# Supplementary material for: SCREEN: A simple layperson administered screening algorithm in low resource international settings significantly reduces waiting time for critically ill children in primary healthcare clinics
Source: PLoS One. 2017 Aug 29;12(8):e0183520. doi: 10.1371/journal.pone.0183520 (PMC5574605; doi:10.1371/journal.pone.0183520)
Supplement: S1 Dataset — (XLSX) [file pone.0183520.s001.xlsx]

## Sheet: Time Analysis
Time Period	clinic	day	entry	questions	exit	entrytime	questionstime	exittime	ambotime	date	Entrysincefirst	First Entry
1	1	1	x	x	x	2015-02-05 07:14:21	2015-02-05 07:14:42	2015-02-05 07:44:15		2015-02-05	0	2015-02-05 07:14:21
1	1	1	x	x		2015-02-05 07:14:49	2015-02-05 07:14:51			2015-02-05	0.466667	2015-02-05 07:14:21
1	1	1	x	x	x	2015-02-05 07:15:23	2015-02-05 07:15:28	2015-02-05 07:44:23		2015-02-05	1.03342	2015-02-05 07:14:20
1	1	1	x	x	x	2015-02-05 07:19:08	2015-02-05 07:19:12	2015-02-05 07:44:26		2015-02-05	4.78342	2015-02-05 07:14:20
1	1	1	x	x		2015-02-05 07:20:59	2015-02-05 07:21:16			2015-02-05	6.63342	2015-02-05 07:14:20
1	1	1	x	x	x	2015-02-05 07:22:44	2015-02-05 07:22:52	2015-02-05 07:45:03		2015-02-05	8.38342	2015-02-05 07:14:20
1	1	1	x	x		2015-02-05 07:23:05	2015-02-05 07:23:07			2015-02-05	8.73342	2015-02-05 07:14:20
1	1	1	x	x		2015-02-05 07:23:27	2015-02-05 07:23:35			2015-02-05	9.10008	2015-02-05 07:14:20
1	1	1	x	x		2015-02-05 07:25:28	2015-02-05 07:25:55			2015-02-05	11.1167	2015-02-05 07:14:20
1	1	1	x	x		2015-02-05 07:26:04	2015-02-05 07:26:21			2015-02-05	11.7167	2015-02-05 07:14:20
1	1	1	x	x		2015-02-05 07:28:13	2015-02-05 07:28:22			2015-02-05	13.8667	2015-02-05 07:14:20
1	1	1	x	x		2015-02-05 07:28:27	2015-02-05 07:28:37			2015-02-05	14.1001	2015-02-05 07:14:20
1	1	1	x	x		2015-02-05 07:29:00	2015-02-05 07:29:09			2015-02-05	14.6501	2015-02-05 07:14:20
1	1	1	x	x		2015-02-05 07:29:43	2015-02-05 07:29:50			2015-02-05	15.3667	2015-02-05 07:14:20
1	1	1	x	x		2015-02-05 07:30:32	2015-02-05 07:30:39			2015-02-05	16.1834	2015-02-05 07:14:20
1	1	1	x	x		2015-02-05 07:31:08	2015-02-05 07:31:57			2015-02-05	16.7834	2015-02-05 07:14:20
1	1	1	x	x		2015-02-05 07:32:14	2015-02-05 07:32:16			2015-02-05	17.8834	2015-02-05 07:14:20
1	1	1	x	x		2015-02-05 07:32:52	2015-02-05 07:32:55			2015-02-05	18.5167	2015-02-05 07:14:20
1	1	1	x	x		2015-02-05 07:33:17	2015-02-05 07:33:31			2015-02-05	18.9334	2015-02-05 07:14:20
1	1	1	x	x		2015-02-05 07:33:47	2015-02-05 07:33:55			2015-02-05	19.4334	2015-02-05 07:14:20
1	1	1	x	x		2015-02-05 07:34:46	2015-02-05 07:35:01			2015-02-05	20.4167	2015-02-05 07:14:20
1	1	1	x	x		2015-02-05 07:35:13	2015-02-05 07:35:55			2015-02-05	20.8667	2015-02-05 07:14:20
1	1	1	x	x		2015-02-05 07:42:47	2015-02-05 07:42:50			2015-02-05	28.4334	2015-02-05 07:14:20
1	1	1	x	x		2015-02-05 07:43:57	2015-02-05 07:44:11			2015-02-05	29.6001	2015-02-05 07:14:20
1	1	1	x	x		2015-02-05 07:45:05	2015-02-05 07:45:28			2015-02-05	30.7334	2015-02-05 07:14:20
1	1	1	x	x		2015-02-05 07:47:45	2015-02-05 07:50:19			2015-02-05	33.4001	2015-02-05 07:14:20
1	1	1	x	x		2015-02-05 07:51:34	2015-02-05 07:55:25			2015-02-05	37.2167	2015-02-05 07:14:20
1	1	1	x	x		2015-02-05 07:56:31	2015-02-05 07:57:03			2015-02-05	42.1667	2015-02-05 07:14:20
1	1	1	x	x		2015-02-05 07:59:58	2015-02-05 08:00:04			2015-02-05	45.6167	2015-02-05 07:14:20
1	1	1	x	x		2015-02-05 08:00:50	2015-02-05 08:01:49			2015-02-05	46.4834	2015-02-05 07:14:20
1	1	1	x	x		2015-02-05 08:02:57	2015-02-05 08:03:18			2015-02-05	48.6001	2015-02-05 07:14:20
1	1	1	x	x		2015-02-05 08:05:55	2015-02-05 08:05:57			2015-02-05	51.5667	2015-02-05 07:14:20
1	1	1	x	x		2015-02-05 08:06:46	2015-02-05 08:06:52			2015-02-05	52.4167	2015-02-05 07:14:20
1	1	1	x	x	x	2015-02-05 08:11:11	2015-02-05 08:11:24	2015-02-05 08:12:28		2015-02-05	56.8334	2015-02-05 07:14:20
1	1	1	x	x		2015-02-05 08:12:34	2015-02-05 08:13:39			2015-02-05	58.2167	2015-02-05 07:14:20
1	1	1	x	x		2015-02-05 08:13:41	2015-02-05 08:13:50			2015-02-05	59.3334	2015-02-05 07:14:20
1	1	1	x			2015-02-05 08:14:15				2015-02-05	59.9001	2015-02-05 07:14:20
1	1	1	x	x		2015-02-05 08:14:25	2015-02-05 08:14:31			2015-02-05	60.0667	2015-02-05 07:14:20
1	1	1	x			2015-02-05 08:19:36				2015-02-05	65.2501	2015-02-05 07:14:20
1	1	1	x	x		2015-02-05 08:28:01	2015-02-05 08:29:27			2015-02-05	73.6667	2015-02-05 07:14:20
1	1	1	x			2015-02-05 08:30:27				2015-02-05	76.1001	2015-02-05 07:14:20
1	1	1	x			2015-02-05 08:32:00				2015-02-05	77.6501	2015-02-05 07:14:20
1	1	1	x	x		2015-02-05 08:33:18	2015-02-05 08:34:39			2015-02-05	78.9501	2015-02-05 07:14:20
1	1	1	x	x		2015-02-05 08:33:27	2015-02-05 08:34:15			2015-02-05	79.1001	2015-02-05 07:14:20
1	1	1	x	x		2015-02-05 08:42:02	2015-02-05 08:45:38			2015-02-05	87.6834	2015-02-05 07:14:20
1	1	1	x	x		2015-02-05 08:45:05	2015-02-05 08:46:01			2015-02-05	90.7334	2015-02-05 07:14:20
1	1	1	x	x		2015-02-05 08:46:23	2015-02-05 08:46:38			2015-02-05	92.0334	2015-02-05 07:14:20
1	1	1	x	x		2015-02-05 08:51:49	2015-02-05 08:52:26			2015-02-05	97.4667	2015-02-05 07:14:20
1	1	1	x	x		2015-02-05 08:53:37	2015-02-05 08:53:56			2015-02-05	99.2667	2015-02-05 07:14:20
1	1	1	x	x		2015-02-05 09:02:57	2015-02-05 09:03:29			2015-02-05	108.6	2015-02-05 07:14:20
1	1	1	x	x		2015-02-05 09:04:27	2015-02-05 09:04:33			2015-02-05	110.1	2015-02-05 07:14:20
1	1	1	x	x		2015-02-05 09:11:43	2015-02-05 09:11:50			2015-02-05	117.367	2015-02-05 07:14:20
1	1	1	x	x		2015-02-05 09:11:46	2015-02-05 09:12:13			2015-02-05	117.417	2015-02-05 07:14:20
1	1	1	x	x		2015-02-05 09:20:35	2015-02-05 09:21:34			2015-02-05	126.233	2015-02-05 07:14:20
1	1	1	x	x	x	2015-02-05 09:29:53	2015-02-05 09:30:06	2015-02-05 09:38:02		2015-02-05	135.533	2015-02-05 07:14:20
1	1	1	x	x		2015-02-05 09:33:58	2015-02-05 09:44:43			2015-02-05	139.617	2015-02-05 07:14:20
1	1	1	x	x		2015-02-05 09:44:25	2015-02-05 09:44:46			2015-02-05	150.067	2015-02-05 07:14:20
1	1	1	x	x		2015-02-05 10:01:19	2015-02-05 10:02:00			2015-02-05	166.967	2015-02-05 07:14:20
1	1	1	x	x		2015-02-05 10:08:38	2015-02-05 10:09:44			2015-02-05	174.283	2015-02-05 07:14:20
1	1	1	x	x		2015-02-05 10:16:42	2015-02-05 10:16:55			2015-02-05	182.35	2015-02-05 07:14:20
1	1	1	x	x		2015-02-05 10:56:55	2015-02-05 10:57:56			2015-02-05	222.567	2015-02-05 07:14:20
1	1	1	x	x		2015-02-05 10:57:58	2015-02-05 10:57:59			2015-02-05	223.617	2015-02-05 07:14:20
1	1	1	x	x		2015-02-05 11:00:56	2015-02-05 11:01:10			2015-02-05	226.583	2015-02-05 07:14:20
1	1	1	x	x		2015-02-05 11:01:06	2015-02-05 11:01:57			2015-02-05	226.75	2015-02-05 07:14:20
1	1	1	x	x		2015-02-05 11:13:56	2015-02-05 11:15:03			2015-02-05	239.583	2015-02-05 07:14:20
1	1	1	x	x		2015-02-05 11:15:05	2015-02-05 11:15:07			2015-02-05	240.733	2015-02-05 07:14:20
1	1	1	x	x	x	2015-02-05 11:30:55	2015-02-05 11:30:57	2015-02-05 11:32:57		2015-02-05	256.567	2015-02-05 07:14:20
1	1	1	x	x		2015-02-05 11:46:09	2015-02-05 11:46:47			2015-02-05	271.8	2015-02-05 07:14:20
1	1	1	x	x		2015-02-05 12:19:01	2015-02-05 12:22:14			2015-02-05	304.667	2015-02-05 07:14:20
1	1	1	x	x		2015-02-05 12:38:30	2015-02-05 12:38:38			2015-02-05	324.15	2015-02-05 07:14:20
1	1	1	x	x		2015-02-05 13:15:55	2015-02-05 13:16:00			2015-02-05	361.567	2015-02-05 07:14:20
1	1	1	x	x	x	2015-02-05 13:16:47	2015-02-05 13:16:53	2015-02-05 13:23:51		2015-02-05	362.433	2015-02-05 07:14:20
1	1	1	x	x		2015-02-05 13:37:48	2015-02-05 16:41:57			2015-02-05	383.45	2015-02-05 07:14:20
1	1	2	x	x		2015-02-06 07:29:13	2015-02-06 07:29:16			2015-02-06	0	2015-02-06 07:29:13
1	1	2	x	x	x	2015-02-06 07:29:21	2015-02-06 07:29:31	2015-02-06 07:57:21		2015-02-06	0.133333	2015-02-06 07:29:13
1	1	2	x	x		2015-02-06 07:29:47	2015-02-06 07:30:40			2015-02-06	0.56675	2015-02-06 07:29:12
1	1	2	x	x	x	2015-02-06 07:30:07	2015-02-06 07:30:20	2015-02-06 07:57:33		2015-02-06	0.900083	2015-02-06 07:29:12
1	1	2	x	x	x	2015-02-06 07:30:30	2015-02-06 07:30:38	2015-02-06 07:57:28		2015-02-06	1.28342	2015-02-06 07:29:12
1	1	2	x	x		2015-02-06 07:31:16	2015-02-06 07:31:24			2015-02-06	2.05008	2015-02-06 07:29:12
1	1	2	x	x	x	2015-02-06 07:31:28	2015-02-06 07:31:56	2015-02-06 07:57:36		2015-02-06	2.25008	2015-02-06 07:29:12
1	1	2	x	x	x	2015-02-06 07:33:31	2015-02-06 07:33:59	2015-02-06 07:57:44		2015-02-06	4.30008	2015-02-06 07:29:12
1	1	2	x	x		2015-02-06 07:35:13	2015-02-06 07:35:44			2015-02-06	6.00008	2015-02-06 07:29:12
1	1	2	x	x		2015-02-06 07:35:47	2015-02-06 08:01:35			2015-02-06	6.56675	2015-02-06 07:29:12
1	1	2	x	x		2015-02-06 07:37:09	2015-02-06 07:37:44			2015-02-06	7.93342	2015-02-06 07:29:12
1	1	2	x	x		2015-02-06 07:37:52	2015-02-06 07:37:58			2015-02-06	8.65008	2015-02-06 07:29:12
1	1	2	x	x		2015-02-06 07:39:05	2015-02-06 08:02:15			2015-02-06	9.86675	2015-02-06 07:29:12
1	1	2	x	x		2015-02-06 07:39:44	2015-02-06 07:40:00			2015-02-06	10.5167	2015-02-06 07:29:12
1	1	2	x	x		2015-02-06 07:42:14	2015-02-06 08:00:28			2015-02-06	13.0167	2015-02-06 07:29:12
1	1	2	x	x		2015-02-06 07:43:03	2015-02-06 08:00:55			2015-02-06	13.8334	2015-02-06 07:29:12
1	1	2	x	x		2015-02-06 07:43:25	2015-02-06 08:00:57			2015-02-06	14.2001	2015-02-06 07:29:12
1	1	2	x	x		2015-02-06 07:44:00	2015-02-06 08:00:59			2015-02-06	14.7834	2015-02-06 07:29:12
1	1	2	x	x		2015-02-06 07:44:44	2015-02-06 08:01:01			2015-02-06	15.5167	2015-02-06 07:29:12
1	1	2	x	x	x	2015-02-06 07:45:24	2015-02-06 08:01:03	2015-02-06 08:16:56		2015-02-06	16.1834	2015-02-06 07:29:12
1	1	2	x	x		2015-02-06 07:48:17	2015-02-06 08:01:05			2015-02-06	19.0667	2015-02-06 07:29:12
1	1	2	x	x	x	2015-02-06 07:49:08	2015-02-06 08:01:08	2015-02-06 08:16:59		2015-02-06	19.9167	2015-02-06 07:29:12
1	1	2	x	x		2015-02-06 07:49:23	2015-02-06 07:49:26			2015-02-06	20.1668	2015-02-06 07:29:12
1	1	2	x	x	x	2015-02-06 07:50:27	2015-02-06 07:50:35	2015-02-06 08:17:27		2015-02-06	21.2334	2015-02-06 07:29:12
1	1	2	x	x		2015-02-06 07:50:44	2015-02-06 08:01:11			2015-02-06	21.5167	2015-02-06 07:29:12
1	1	2	x	x		2015-02-06 07:52:16	2015-02-06 07:52:18			2015-02-06	23.0501	2015-02-06 07:29:12
1	1	2	x	x		2015-02-06 07:52:48	2015-02-06 08:01:13			2015-02-06	23.5834	2015-02-06 07:29:12
1	1	2	x	x		2015-02-06 07:53:00	2015-02-06 08:01:15			2015-02-06	23.7834	2015-02-06 07:29:12
1	1	2	x	x		2015-02-06 07:53:52	2015-02-06 08:01:17			2015-02-06	24.6501	2015-02-06 07:29:12
1	1	2	x	x		2015-02-06 07:56:18	2015-02-06 08:01:19			2015-02-06	27.0834	2015-02-06 07:29:12
1	1	2	x	x		2015-02-06 07:56:20	2015-02-06 07:57:19			2015-02-06	27.1167	2015-02-06 07:29:12
1	1	2	x	x		2015-02-06 07:58:39	2015-02-06 08:01:23			2015-02-06	29.4334	2015-02-06 07:29:12
1	1	2	x	x	x	2015-02-06 08:05:33	2015-02-06 08:05:47	2015-02-06 08:20:36		2015-02-06	36.3334	2015-02-06 07:29:12
1	1	2	x	x	x	2015-02-06 08:06:05	2015-02-06 08:07:22	2015-02-06 08:20:38		2015-02-06	36.8667	2015-02-06 07:29:12
1	1	2	x	x	x	2015-02-06 08:11:09	2015-02-06 08:13:42	2015-02-06 08:20:47		2015-02-06	41.9334	2015-02-06 07:29:12
1	1	2	x	x		2015-02-06 08:11:11	2015-02-06 08:14:24			2015-02-06	41.9667	2015-02-06 07:29:12
1	1	2	x	x		2015-02-06 08:11:15	2015-02-06 08:14:51			2015-02-06	42.0334	2015-02-06 07:29:12
1	1	2	x	x		2015-02-06 08:11:22	2015-02-06 08:18:34			2015-02-06	42.1501	2015-02-06 07:29:12
1	1	2	x	x		2015-02-06 08:12:55	2015-02-06 08:19:06			2015-02-06	43.7001	2015-02-06 07:29:12
1	1	2	x	x		2015-02-06 08:23:40	2015-02-06 08:28:25			2015-02-06	54.4501	2015-02-06 07:29:12
1	1	2	x	x		2015-02-06 08:31:44	2015-02-06 08:31:59			2015-02-06	62.5168	2015-02-06 07:29:12
1	1	2	x	x		2015-02-06 08:32:01	2015-02-06 08:32:53			2015-02-06	62.8001	2015-02-06 07:29:12
1	1	2	x	x		2015-02-06 08:32:57	2015-02-06 08:35:01			2015-02-06	63.7334	2015-02-06 07:29:12
1	1	2	x	x		2015-02-06 08:39:13	2015-02-06 08:43:13			2015-02-06	70.0001	2015-02-06 07:29:12
1	1	2	x	x		2015-02-06 08:44:14	2015-02-06 08:46:54			2015-02-06	75.0168	2015-02-06 07:29:12
1	1	2	x	x		2015-02-06 08:44:17	2015-02-06 08:47:38			2015-02-06	75.0668	2015-02-06 07:29:12
1	1	2	x	x		2015-02-06 09:04:29	2015-02-06 09:04:55			2015-02-06	95.2667	2015-02-06 07:29:12
1	1	2	x	x		2015-02-06 09:13:32	2015-02-06 09:22:04			2015-02-06	104.317	2015-02-06 07:29:12
1	1	2	x			2015-02-06 09:22:17				2015-02-06	113.067	2015-02-06 07:29:12
1	1	2	x	x		2015-02-06 09:25:35	2015-02-06 09:27:34			2015-02-06	116.367	2015-02-06 07:29:12
1	1	2	x	x		2015-02-06 09:29:43	2015-02-06 09:30:02			2015-02-06	120.5	2015-02-06 07:29:12
1	1	2	x	x		2015-02-06 09:38:08	2015-02-06 09:38:12			2015-02-06	128.917	2015-02-06 07:29:12
1	1	2	x	x		2015-02-06 09:39:00	2015-02-06 09:39:05			2015-02-06	129.783	2015-02-06 07:29:12
1	1	2	x	x		2015-02-06 09:51:20	2015-02-06 09:51:49			2015-02-06	142.117	2015-02-06 07:29:12
1	1	2	x	x		2015-02-06 09:52:31	2015-02-06 09:52:37			2015-02-06	143.3	2015-02-06 07:29:12
1	1	2	x	x		2015-02-06 09:59:23	2015-02-06 09:59:56			2015-02-06	150.167	2015-02-06 07:29:12
1	1	2	x	x	x	2015-02-06 10:00:01	2015-02-06 10:00:05	2015-02-06 10:02:36		2015-02-06	150.8	2015-02-06 07:29:12
1	1	2	x	x		2015-02-06 10:31:33	2015-02-06 10:32:50			2015-02-06	182.333	2015-02-06 07:29:12
1	1	2	x	x		2015-02-06 10:39:25	2015-02-06 10:39:36			2015-02-06	190.2	2015-02-06 07:29:12
1	1	2	x	x		2015-02-06 11:26:26	2015-02-06 11:26:31			2015-02-06	237.217	2015-02-06 07:29:12
1	1	2	x	x	x	2015-02-06 11:28:09	2015-02-06 11:28:22	2015-02-06 11:29:18		2015-02-06	238.933	2015-02-06 07:29:12
1	1	2	x	x		2015-02-06 11:46:41	2015-02-06 11:46:43			2015-02-06	257.467	2015-02-06 07:29:12
1	1	2	x	x		2015-02-06 12:04:15	2015-02-06 12:07:48			2015-02-06	275.033	2015-02-06 07:29:12
1	1	2	x			2015-02-06 12:06:32				2015-02-06	277.317	2015-02-06 07:29:12
1	1	2	x			2015-02-06 12:08:09				2015-02-06	278.933	2015-02-06 07:29:12
1	1	2	x	x		2015-02-06 12:55:24	2015-02-06 12:56:05			2015-02-06	326.183	2015-02-06 07:29:12
1	1	2	x	x		2015-02-06 13:02:56	2015-02-06 13:02:58			2015-02-06	333.717	2015-02-06 07:29:12
1	1	2	x	x		2015-02-06 13:03:28	2015-02-06 13:03:31			2015-02-06	334.25	2015-02-06 07:29:12
1	1	2	x	x		2015-02-06 13:50:21	2015-02-06 13:50:23			2015-02-06	381.133	2015-02-06 07:29:12
1	2	1	x	x		2015-02-10 07:19:35	2015-02-10 07:23:39			2015-02-10	0	2015-02-10 07:19:35
1	2	1	x	x		2015-02-10 07:19:54	2015-02-10 07:23:54			2015-02-10	0.316667	2015-02-10 07:19:35
1	2	1	x	x		2015-02-10 07:20:14	2015-02-10 07:24:28			2015-02-10	0.650083	2015-02-10 07:19:34
1	2	1	x	x		2015-02-10 07:20:46	2015-02-10 07:24:34			2015-02-10	1.18342	2015-02-10 07:19:34
1	2	1	x	x		2015-02-10 07:20:48	2015-02-10 07:24:55			2015-02-10	1.21675	2015-02-10 07:19:34
1	2	1	x	x		2015-02-10 07:21:25	2015-02-10 07:25:03			2015-02-10	1.83342	2015-02-10 07:19:34
1	2	1	x	x		2015-02-10 07:23:28	2015-02-10 07:29:24			2015-02-10	3.88342	2015-02-10 07:19:34
1	2	1	x	x		2015-02-10 07:24:51	2015-02-10 07:32:35			2015-02-10	5.26675	2015-02-10 07:19:34
1	2	1	x			2015-02-10 07:26:15				2015-02-10	6.66675	2015-02-10 07:19:34
1	2	1	x			2015-02-10 07:26:19				2015-02-10	6.73342	2015-02-10 07:19:34
1	2	1	x	x		2015-02-10 07:30:42	2015-02-10 07:30:46			2015-02-10	11.1167	2015-02-10 07:19:34
1	2	1	x	x		2015-02-10 07:31:20	2015-02-10 07:31:39			2015-02-10	11.7501	2015-02-10 07:19:34
1	2	1	x	x		2015-02-10 07:33:00	2015-02-10 07:33:15			2015-02-10	13.4167	2015-02-10 07:19:34
1	2	1	x	x		2015-02-10 07:35:26	2015-02-10 07:36:08			2015-02-10	15.8501	2015-02-10 07:19:34
1	2	1	x	x		2015-02-10 07:37:14	2015-02-10 07:37:43			2015-02-10	17.6501	2015-02-10 07:19:34
1	2	1	x	x		2015-02-10 07:37:56	2015-02-10 07:38:06			2015-02-10	18.3501	2015-02-10 07:19:34
1	2	1	x	x		2015-02-10 07:39:42	2015-02-10 07:40:38			2015-02-10	20.1168	2015-02-10 07:19:34
1	2	1	x	x		2015-02-10 07:41:58	2015-02-10 07:42:02			2015-02-10	22.3834	2015-02-10 07:19:34
1	2	1	x	x		2015-02-10 07:41:59	2015-02-10 07:42:07			2015-02-10	22.4001	2015-02-10 07:19:34
1	2	1	x	x		2015-02-10 07:42:11	2015-02-10 07:43:14			2015-02-10	22.6001	2015-02-10 07:19:34
1	2	1	x	x	x	2015-02-10 07:42:42	2015-02-10 07:43:41	2015-02-10 07:45:43		2015-02-10	23.1168	2015-02-10 07:19:34
1	2	1	x	x		2015-02-10 07:51:56	2015-02-10 07:53:31			2015-02-10	32.3501	2015-02-10 07:19:34
1	2	1	x	x		2015-02-10 07:52:01	2015-02-10 07:53:33			2015-02-10	32.4334	2015-02-10 07:19:34
1	2	1	x	x		2015-02-10 07:54:15	2015-02-10 07:54:48			2015-02-10	34.6667	2015-02-10 07:19:34
1	2	1	x	x		2015-02-10 08:01:02	2015-02-10 08:01:12			2015-02-10	41.4501	2015-02-10 07:19:34
1	2	1	x	x		2015-02-10 08:01:30	2015-02-10 08:01:55			2015-02-10	41.9167	2015-02-10 07:19:34
1	2	1	x	x		2015-02-10 08:02:20	2015-02-10 08:02:41			2015-02-10	42.7501	2015-02-10 07:19:34
1	2	1	x	x		2015-02-10 08:03:55	2015-02-10 08:04:03			2015-02-10	44.3334	2015-02-10 07:19:34
1	2	1	x	x		2015-02-10 08:05:52	2015-02-10 08:06:15			2015-02-10	46.2834	2015-02-10 07:19:34
1	2	1	x	x		2015-02-10 08:09:43	2015-02-10 08:10:15			2015-02-10	50.1334	2015-02-10 07:19:34
1	2	1	x	x	x	2015-02-10 08:09:48	2015-02-10 08:11:03	2015-02-10 08:13:06		2015-02-10	50.2167	2015-02-10 07:19:34
1	2	1	x	x		2015-02-10 08:15:19	2015-02-10 08:15:39			2015-02-10	55.7334	2015-02-10 07:19:34
1	2	1	x	x		2015-02-10 08:18:41	2015-02-10 08:18:57			2015-02-10	59.1001	2015-02-10 07:19:34
1	2	1	x	x		2015-02-10 08:18:43	2015-02-10 08:19:13			2015-02-10	59.1334	2015-02-10 07:19:34
1	2	1	x	x		2015-02-10 08:19:54	2015-02-10 08:20:15			2015-02-10	60.3168	2015-02-10 07:19:34
1	2	1	x			2015-02-10 08:31:09				2015-02-10	71.5668	2015-02-10 07:19:34
1	2	1	x	x		2015-02-10 08:35:55	2015-02-10 08:36:13			2015-02-10	76.3334	2015-02-10 07:19:34
1	2	1	x	x		2015-02-10 08:36:14	2015-02-10 08:36:29			2015-02-10	76.6501	2015-02-10 07:19:34
1	2	1	x	x		2015-02-10 08:37:38	2015-02-10 08:38:07			2015-02-10	78.0501	2015-02-10 07:19:34
1	2	1	x	x		2015-02-10 08:43:16	2015-02-10 08:43:27			2015-02-10	83.6834	2015-02-10 07:19:34
1	2	1	x	x		2015-02-10 08:47:25	2015-02-10 08:47:35			2015-02-10	87.8334	2015-02-10 07:19:34
1	2	1	x	x		2015-02-10 08:48:57	2015-02-10 08:49:16			2015-02-10	89.3668	2015-02-10 07:19:34
1	2	1	x	x		2015-02-10 08:49:08	2015-02-10 08:49:28			2015-02-10	89.5501	2015-02-10 07:19:34
1	2	1	x	x		2015-02-10 08:50:47	2015-02-10 08:50:49			2015-02-10	91.2001	2015-02-10 07:19:34
1	2	1	x	x		2015-02-10 08:53:13	2015-02-10 08:54:06			2015-02-10	93.6334	2015-02-10 07:19:34
1	2	1	x	x		2015-02-10 08:55:00	2015-02-10 08:55:02			2015-02-10	95.4168	2015-02-10 07:19:34
1	2	1	x	x		2015-02-10 08:56:05	2015-02-10 08:56:21			2015-02-10	96.5001	2015-02-10 07:19:34
1	2	1	x	x		2015-02-10 08:56:12	2015-02-10 08:56:24			2015-02-10	96.6167	2015-02-10 07:19:34
1	2	1	x	x		2015-02-10 08:56:15	2015-02-10 08:57:34			2015-02-10	96.6668	2015-02-10 07:19:34
1	2	1	x	x		2015-02-10 09:00:16	2015-02-10 09:00:51			2015-02-10	100.683	2015-02-10 07:19:34
1	2	1	x	x		2015-02-10 09:06:18	2015-02-10 09:06:58			2015-02-10	106.717	2015-02-10 07:19:34
1	2	1	x	x		2015-02-10 09:06:22	2015-02-10 09:07:01			2015-02-10	106.783	2015-02-10 07:19:34
1	2	1	x			2015-02-10 09:07:35				2015-02-10	108	2015-02-10 07:19:34
1	2	1	x	x		2015-02-10 09:15:40	2015-02-10 09:15:53			2015-02-10	116.083	2015-02-10 07:19:34
1	2	1	x	x		2015-02-10 09:15:51	2015-02-10 09:17:01			2015-02-10	116.267	2015-02-10 07:19:34
1	2	1	x	x		2015-02-10 09:19:15	2015-02-10 09:19:20			2015-02-10	119.667	2015-02-10 07:19:34
1	2	1	x	x		2015-02-10 09:21:32	2015-02-10 09:22:37			2015-02-10	121.95	2015-02-10 07:19:34
1	2	1	x	x		2015-02-10 09:23:45	2015-02-10 09:24:55			2015-02-10	124.167	2015-02-10 07:19:34
1	2	1	x	x		2015-02-10 09:28:51	2015-02-10 09:29:16			2015-02-10	129.267	2015-02-10 07:19:34
1	2	1	x	x		2015-02-10 09:39:08	2015-02-10 09:39:22			2015-02-10	139.55	2015-02-10 07:19:34
1	2	1	x	x		2015-02-10 09:39:16	2015-02-10 09:41:04			2015-02-10	139.683	2015-02-10 07:19:34
1	2	1	x	x		2015-02-10 09:39:19	2015-02-10 09:41:41			2015-02-10	139.733	2015-02-10 07:19:34
1	2	1	x			2015-02-10 10:42:50				2015-02-10	203.25	2015-02-10 07:19:34
1	2	1	x	x		2015-02-10 10:50:38	2015-02-10 10:50:59			2015-02-10	211.05	2015-02-10 07:19:34
1	2	1	x	x		2015-02-10 11:37:25	2015-02-10 11:37:36			2015-02-10	257.833	2015-02-10 07:19:34
1	2	1	x			2015-02-10 12:14:12				2015-02-10	294.617	2015-02-10 07:19:34
1	2	1	x	x		2015-02-10 13:42:42	2015-02-10 14:17:25			2015-02-10	383.117	2015-02-10 07:19:34
1	2	1	x	x		2015-02-10 14:16:50	2015-02-10 14:16:52			2015-02-10	417.25	2015-02-10 07:19:34
1	2	2	x	x		2015-02-11 07:22:57	2015-02-11 07:25:54			2015-02-11	0	2015-02-11 07:22:57
1	2	2	x	x		2015-02-11 07:23:03	2015-02-11 07:26:02			2015-02-11	0.1	2015-02-11 07:22:57
1	2	2	x	x		2015-02-11 07:23:14	2015-02-11 07:26:06			2015-02-11	0.283417	2015-02-11 07:22:56
1	2	2	x	x		2015-02-11 07:29:41	2015-02-11 07:29:46			2015-02-11	6.73342	2015-02-11 07:22:56
1	2	2	x	x		2015-02-11 07:32:40	2015-02-11 07:33:35			2015-02-11	9.71675	2015-02-11 07:22:56
1	2	2	x	x		2015-02-11 07:33:52	2015-02-11 07:34:59		2015-02-11 13:45:00	2015-02-11	10.9167	2015-02-11 07:22:56
1	2	2	x	x		2015-02-11 07:35:33	2015-02-11 07:35:51			2015-02-11	12.6001	2015-02-11 07:22:56
1	2	2	x	x		2015-02-11 07:39:04	2015-02-11 07:49:57			2015-02-11	16.1167	2015-02-11 07:22:56
1	2	2	x	x		2015-02-11 07:39:51	2015-02-11 07:49:58			2015-02-11	16.9001	2015-02-11 07:22:56
1	2	2	x	x		2015-02-11 07:42:40	2015-02-11 07:50:02			2015-02-11	19.7167	2015-02-11 07:22:56
1	2	2	x	x		2015-02-11 07:44:34	2015-02-11 07:50:06			2015-02-11	21.6167	2015-02-11 07:22:56
1	2	2	x	x		2015-02-11 07:44:45	2015-02-11 07:49:17			2015-02-11	21.8001	2015-02-11 07:22:56
1	2	2	x	x		2015-02-11 07:46:36	2015-02-11 07:48:16			2015-02-11	23.6501	2015-02-11 07:22:56
1	2	2	x	x		2015-02-11 07:46:59	2015-02-11 07:47:08			2015-02-11	24.0334	2015-02-11 07:22:56
1	2	2	x	x		2015-02-11 07:47:40	2015-02-11 07:50:10			2015-02-11	24.7167	2015-02-11 07:22:56
1	2	2	x	x		2015-02-11 07:57:09	2015-02-11 07:57:19			2015-02-11	34.2001	2015-02-11 07:22:56
1	2	2	x	x		2015-02-11 07:58:00	2015-02-11 07:58:31			2015-02-11	35.0501	2015-02-11 07:22:56
1	2	2	x	x		2015-02-11 07:59:20	2015-02-11 08:00:13			2015-02-11	36.3834	2015-02-11 07:22:56
1	2	2	x			2015-02-11 08:06:42				2015-02-11	43.7501	2015-02-11 07:22:56
1	2	2	x	x		2015-02-11 08:07:57	2015-02-11 08:08:23			2015-02-11	45.0001	2015-02-11 07:22:56
1	2	2	x	x		2015-02-11 08:07:59	2015-02-11 08:08:20			2015-02-11	45.0334	2015-02-11 07:22:56
1	2	2	x	x		2015-02-11 08:10:11	2015-02-11 08:10:22			2015-02-11	47.2334	2015-02-11 07:22:56
1	2	2	x	x		2015-02-11 08:12:11	2015-02-11 08:13:52			2015-02-11	49.2334	2015-02-11 07:22:56
1	2	2	x	x		2015-02-11 08:14:49	2015-02-11 08:15:39			2015-02-11	51.8667	2015-02-11 07:22:56
1	2	2	x	x		2015-02-11 08:15:09	2015-02-11 08:17:15			2015-02-11	52.2001	2015-02-11 07:22:56
1	2	2	x	x		2015-02-11 08:17:49	2015-02-11 08:17:51			2015-02-11	54.8667	2015-02-11 07:22:56
1	2	2	x	x		2015-02-11 08:20:31	2015-02-11 08:20:37			2015-02-11	57.5667	2015-02-11 07:22:56
1	2	2	x	x		2015-02-11 08:22:23	2015-02-11 08:22:30			2015-02-11	59.4334	2015-02-11 07:22:56
1	2	2	x	x		2015-02-11 08:22:47	2015-02-11 08:22:50			2015-02-11	59.8334	2015-02-11 07:22:56
1	2	2	x	x		2015-02-11 08:23:59	2015-02-11 08:24:51			2015-02-11	61.0334	2015-02-11 07:22:56
1	2	2	x	x		2015-02-11 08:30:19	2015-02-11 08:32:25			2015-02-11	67.3667	2015-02-11 07:22:56
1	2	2	x	x		2015-02-11 08:32:27	2015-02-11 08:32:30			2015-02-11	69.5001	2015-02-11 07:22:56
1	2	2	x	x		2015-02-11 08:35:44	2015-02-11 08:36:54			2015-02-11	72.7834	2015-02-11 07:22:56
1	2	2	x	x		2015-02-11 08:36:57	2015-02-11 08:37:03			2015-02-11	74.0001	2015-02-11 07:22:56
1	2	2	x	x		2015-02-11 08:52:49	2015-02-11 08:52:51			2015-02-11	89.8667	2015-02-11 07:22:56
1	2	2	x	x		2015-02-11 08:52:54	2015-02-11 08:53:45			2015-02-11	89.9501	2015-02-11 07:22:56
1	2	2	x	x		2015-02-11 08:52:58	2015-02-11 08:53:01			2015-02-11	90.0167	2015-02-11 07:22:56
1	2	2	x	x		2015-02-11 08:53:03	2015-02-11 08:53:05			2015-02-11	90.1001	2015-02-11 07:22:56
1	2	2	x	x		2015-02-11 08:53:12	2015-02-11 08:53:39			2015-02-11	90.2501	2015-02-11 07:22:56
1	2	2	x	x		2015-02-11 08:53:35	2015-02-11 08:52:56			2015-02-11	90.6334	2015-02-11 07:22:56
1	2	2	x	x		2015-02-11 08:53:54	2015-02-11 08:55:09			2015-02-11	90.9501	2015-02-11 07:22:56
1	2	2	x	x	x	2015-02-11 08:55:11	2015-02-11 08:55:13	2015-02-11 08:59:02	2015-02-11 10:37:00	2015-02-11	92.2334	2015-02-11 07:22:56
1	2	2	x	x		2015-02-11 09:00:26	2015-02-11 09:01:02			2015-02-11	97.4834	2015-02-11 07:22:56
1	2	2	x	x		2015-02-11 09:03:47	2015-02-11 09:04:58			2015-02-11	100.833	2015-02-11 07:22:56
1	2	2	x	x		2015-02-11 09:06:10	2015-02-11 09:06:19			2015-02-11	103.217	2015-02-11 07:22:56
1	2	2	x	x	x	2015-02-11 09:22:12	2015-02-11 09:22:17	2015-02-11 09:26:55		2015-02-11	119.25	2015-02-11 07:22:56
1	2	2	x	x		2015-02-11 09:26:57	2015-02-11 09:27:06			2015-02-11	124	2015-02-11 07:22:56
1	2	2	x	x		2015-02-11 09:28:02	2015-02-11 09:28:08			2015-02-11	125.083	2015-02-11 07:22:56
1	2	2	x	x		2015-02-11 09:29:47	2015-02-11 09:30:11			2015-02-11	126.833	2015-02-11 07:22:56
1	2	2	x	x		2015-02-11 09:32:23	2015-02-11 09:33:53			2015-02-11	129.433	2015-02-11 07:22:56
1	2	2	x	x		2015-02-11 09:43:17	2015-02-11 09:43:19			2015-02-11	140.333	2015-02-11 07:22:56
1	2	2	x	x		2015-02-11 09:56:49	2015-02-11 10:01:43			2015-02-11	153.867	2015-02-11 07:22:56
1	2	2	x	x		2015-02-11 10:01:50	2015-02-11 10:01:47			2015-02-11	158.883	2015-02-11 07:22:56
1	2	2	x			2015-02-11 10:14:30				2015-02-11	171.55	2015-02-11 07:22:56
1	2	2	x			2015-02-11 10:33:48				2015-02-11	190.85	2015-02-11 07:22:56
1	2	2	x	x		2015-02-11 10:35:27	2015-02-11 10:35:35			2015-02-11	192.5	2015-02-11 07:22:56
1	2	2	x	x		2015-02-11 10:37:26	2015-02-11 10:39:28			2015-02-11	194.483	2015-02-11 07:22:56
1	2	2	x	x		2015-02-11 11:44:37	2015-02-11 11:44:41			2015-02-11	261.667	2015-02-11 07:22:56
1	2	2	x	x		2015-02-11 12:29:08	2015-02-11 12:29:15			2015-02-11	306.183	2015-02-11 07:22:56
1	2	2	x	x		2015-02-11 12:29:16	2015-02-11 12:29:18			2015-02-11	306.317	2015-02-11 07:22:56
1	2	2	x	x		2015-02-11 12:29:19	2015-02-11 12:29:22			2015-02-11	306.367	2015-02-11 07:22:56
1	2	2	x	x		2015-02-11 13:35:38	2015-02-11 13:35:40			2015-02-11	372.683	2015-02-11 07:22:56
1	2	2	x	x		2015-02-11 13:55:02	2015-02-11 13:55:03			2015-02-11	392.083	2015-02-11 07:22:56
1	2	2	x	x		2015-02-11 14:04:29	2015-02-11 14:04:32			2015-02-11	401.533	2015-02-11 07:22:56
1	2	2	x			2015-02-11 14:04:36				2015-02-11	401.65	2015-02-11 07:22:56
1	2	2	x	x		2015-02-11 14:08:47	2015-02-11 14:08:49			2015-02-11	405.833	2015-02-11 07:22:56
1	2	2	x	x		2015-02-11 14:16:32	2015-02-11 14:16:34			2015-02-11	413.583	2015-02-11 07:22:56
1	2	2	x	x		2015-02-11 14:32:48	2015-02-11 14:32:49			2015-02-11	429.85	2015-02-11 07:22:56
1	2	2	x			2015-02-11 14:56:33				2015-02-11	453.6	2015-02-11 07:22:56
1	2	2	x			2015-02-11 14:56:36				2015-02-11	453.65	2015-02-11 07:22:56
1	3	1	x	x		2015-02-12 07:37:51	2015-02-12 07:38:09			2015-02-12	0	2015-02-12 07:37:51
1	3	1	x	x		2015-02-12 07:38:16	2015-02-12 07:38:40			2015-02-12	0.416667	2015-02-12 07:37:51
1	3	1	x	x		2015-02-12 07:38:49	2015-02-12 07:38:53			2015-02-12	0.966667	2015-02-12 07:37:51
1	3	1	x	x	x	2015-02-12 07:38:56	2015-02-12 07:39:02	2015-02-12 07:40:47		2015-02-12	1.08333	2015-02-12 07:37:51
1	3	1	x	x		2015-02-12 07:42:01	2015-02-12 07:42:38			2015-02-12	4.16667	2015-02-12 07:37:51
1	3	1	x	x		2015-02-12 07:42:52	2015-02-12 07:43:20			2015-02-12	5.01667	2015-02-12 07:37:51
1	3	1	x	x		2015-02-12 07:43:34	2015-02-12 07:43:38			2015-02-12	5.71667	2015-02-12 07:37:51
1	3	1	x	x		2015-02-12 07:44:05	2015-02-12 07:44:11			2015-02-12	6.23333	2015-02-12 07:37:51
1	3	1	x	x		2015-02-12 07:44:16	2015-02-12 07:44:33			2015-02-12	6.41667	2015-02-12 07:37:51
1	3	1	x	x		2015-02-12 07:44:48	2015-02-12 07:45:04			2015-02-12	6.95	2015-02-12 07:37:51
1	3	1	x	x		2015-02-12 07:45:07	2015-02-12 07:45:37			2015-02-12	7.26667	2015-02-12 07:37:51
1	3	1	x	x		2015-02-12 07:45:55	2015-02-12 07:46:03			2015-02-12	8.06667	2015-02-12 07:37:51
1	3	1	x	x	x	2015-02-12 07:46:08	2015-02-12 07:46:49	2015-02-12 07:50:03		2015-02-12	8.28333	2015-02-12 07:37:51
1	3	1	x	x		2015-02-12 07:46:54	2015-02-12 07:48:10			2015-02-12	9.05	2015-02-12 07:37:51
1	3	1	x	x		2015-02-12 07:48:13	2015-02-12 07:48:16			2015-02-12	10.3667	2015-02-12 07:37:51
1	3	1	x	x		2015-02-12 07:48:44	2015-02-12 07:49:00			2015-02-12	10.8833	2015-02-12 07:37:51
1	3	1	x	x		2015-02-12 07:49:04	2015-02-12 07:49:07			2015-02-12	11.2167	2015-02-12 07:37:51
1	3	1	x	x		2015-02-12 07:49:09	2015-02-12 07:49:12			2015-02-12	11.3	2015-02-12 07:37:51
1	3	1	x	x		2015-02-12 07:49:26	2015-02-12 07:49:43			2015-02-12	11.5833	2015-02-12 07:37:51
1	3	1	x	x		2015-02-12 07:49:46	2015-02-12 07:49:54			2015-02-12	11.9167	2015-02-12 07:37:51
1	3	1	x	x		2015-02-12 07:50:12	2015-02-12 07:50:16			2015-02-12	12.35	2015-02-12 07:37:51
1	3	1	x	x		2015-02-12 07:50:32	2015-02-12 07:51:04			2015-02-12	12.6833	2015-02-12 07:37:51
1	3	1	x	x		2015-02-12 07:51:15	2015-02-12 07:51:17			2015-02-12	13.4	2015-02-12 07:37:51
1	3	1	x	x		2015-02-12 07:51:30	2015-02-12 07:51:32			2015-02-12	13.65	2015-02-12 07:37:51
1	3	1	x	x		2015-02-12 07:52:16	2015-02-12 07:52:47			2015-02-12	14.4167	2015-02-12 07:37:51
1	3	1	x	x		2015-02-12 07:52:50	2015-02-12 07:53:00			2015-02-12	14.9833	2015-02-12 07:37:51
1	3	1	x	x		2015-02-12 07:53:03	2015-02-12 07:53:31			2015-02-12	15.2	2015-02-12 07:37:51
1	3	1	x	x		2015-02-12 07:53:44	2015-02-12 07:54:13			2015-02-12	15.8833	2015-02-12 07:37:51
1	3	1	x	x		2015-02-12 07:54:16	2015-02-12 07:54:28			2015-02-12	16.4167	2015-02-12 07:37:51
1	3	1	x	x		2015-02-12 07:54:33	2015-02-12 07:54:52			2015-02-12	16.7	2015-02-12 07:37:51
1	3	1	x	x		2015-02-12 07:55:09	2015-02-12 07:55:28			2015-02-12	17.3	2015-02-12 07:37:51
1	3	1	x	x		2015-02-12 07:56:14	2015-02-12 07:56:29			2015-02-12	18.3833	2015-02-12 07:37:51
1	3	1	x	x		2015-02-12 07:56:36	2015-02-12 07:56:50			2015-02-12	18.75	2015-02-12 07:37:51
1	3	1	x	x		2015-02-12 07:56:55	2015-02-12 07:56:57			2015-02-12	19.0667	2015-02-12 07:37:51
1	3	1	x	x	x	2015-02-12 07:57:01	2015-02-12 07:57:26	2015-02-12 08:11:50		2015-02-12	19.1667	2015-02-12 07:37:51
1	3	1	x	x		2015-02-12 08:04:09	2015-02-12 08:04:11			2015-02-12	26.3	2015-02-12 07:37:51
1	3	1	x	x		2015-02-12 08:05:11	2015-02-12 08:05:14			2015-02-12	27.3333	2015-02-12 07:37:51
1	3	1	x	x	x	2015-02-12 08:05:56	2015-02-12 08:05:58	2015-02-12 08:06:41		2015-02-12	28.0833	2015-02-12 07:37:51
1	3	1	x	x		2015-02-12 08:07:27	2015-02-12 08:08:59			2015-02-12	29.6	2015-02-12 07:37:51
1	3	1	x	x		2015-02-12 08:07:29	2015-02-12 08:09:28			2015-02-12	29.6333	2015-02-12 07:37:51
1	3	1	x	x		2015-02-12 08:07:35	2015-02-12 08:10:44			2015-02-12	29.7333	2015-02-12 07:37:51
1	3	1	x	x		2015-02-12 08:09:18	2015-02-12 08:10:59			2015-02-12	31.45	2015-02-12 07:37:51
1	3	1	x	x		2015-02-12 08:17:05	2015-02-12 08:17:08			2015-02-12	39.2333	2015-02-12 07:37:51
1	3	1	x	x		2015-02-12 08:17:06	2015-02-12 08:17:10			2015-02-12	39.25	2015-02-12 07:37:51
1	3	1	x	x		2015-02-12 08:21:51	2015-02-12 08:22:11			2015-02-12	44	2015-02-12 07:37:51
1	3	1	x	x		2015-02-12 08:23:04	2015-02-12 08:23:41			2015-02-12	45.2167	2015-02-12 07:37:51
1	3	1	x	x		2015-02-12 08:23:15	2015-02-12 08:24:27			2015-02-12	45.4	2015-02-12 07:37:51
1	3	1	x	x	x	2015-02-12 08:23:25	2015-02-12 08:24:57	2015-02-12 08:27:35		2015-02-12	45.5667	2015-02-12 07:37:51
1	3	1	x	x		2015-02-12 08:26:28	2015-02-12 08:28:41			2015-02-12	48.6167	2015-02-12 07:37:51
1	3	1	x	x		2015-02-12 08:31:02	2015-02-12 08:36:14			2015-02-12	53.1833	2015-02-12 07:37:51
1	3	1	x	x		2015-02-12 08:31:03	2015-02-12 08:38:27			2015-02-12	53.2	2015-02-12 07:37:51
1	3	1	x	x		2015-02-12 08:31:12	2015-02-12 08:39:18			2015-02-12	53.35	2015-02-12 07:37:51
1	3	1	x	x		2015-02-12 08:31:14	2015-02-12 08:40:05			2015-02-12	53.3833	2015-02-12 07:37:51
1	3	1	x	x	x	2015-02-12 08:31:15	2015-02-12 08:41:52	2015-02-12 08:45:33		2015-02-12	53.4	2015-02-12 07:37:51
1	3	1	x	x		2015-02-12 08:37:17	2015-02-12 08:45:56			2015-02-12	59.4333	2015-02-12 07:37:51
1	3	1	x	x		2015-02-12 08:39:12	2015-02-12 08:48:41			2015-02-12	61.35	2015-02-12 07:37:51
1	3	1	x	x	x	2015-02-12 08:39:23	2015-02-12 08:49:18	2015-02-12 08:51:10		2015-02-12	61.5333	2015-02-12 07:37:51
1	3	1	x	x		2015-02-12 08:46:39	2015-02-12 09:01:16			2015-02-12	68.8	2015-02-12 07:37:51
1	3	1	x	x		2015-02-12 08:48:52	2015-02-12 09:04:26			2015-02-12	71.0167	2015-02-12 07:37:51
1	3	1	x	x		2015-02-12 08:50:26	2015-02-12 09:05:06			2015-02-12	72.5833	2015-02-12 07:37:51
1	3	1	x	x		2015-02-12 09:03:05	2015-02-12 09:05:22			2015-02-12	85.2333	2015-02-12 07:37:51
1	3	1	x	x	x	2015-02-12 09:03:29	2015-02-12 09:06:11	2015-02-12 09:07:02		2015-02-12	85.6333	2015-02-12 07:37:51
1	3	1	x	x		2015-02-12 09:05:45	2015-02-12 09:10:46			2015-02-12	87.9	2015-02-12 07:37:51
1	3	1	x			2015-02-12 09:08:51				2015-02-12	91	2015-02-12 07:37:51
1	3	1	x	x		2015-02-12 09:15:11	2015-02-12 09:15:15			2015-02-12	97.3333	2015-02-12 07:37:51
1	3	1	x	x		2015-02-12 09:26:50	2015-02-12 09:27:05			2015-02-12	108.983	2015-02-12 07:37:51
1	3	1	x	x		2015-02-12 09:27:30	2015-02-12 09:27:52			2015-02-12	109.65	2015-02-12 07:37:51
1	3	1	x	x		2015-02-12 09:29:11	2015-02-12 09:29:20			2015-02-12	111.333	2015-02-12 07:37:51
1	3	1	x	x		2015-02-12 09:29:52	2015-02-12 09:29:54			2015-02-12	112.017	2015-02-12 07:37:51
1	3	1	x	x		2015-02-12 09:30:30	2015-02-12 09:31:57			2015-02-12	112.65	2015-02-12 07:37:51
1	3	1	x	x		2015-02-12 09:31:59	2015-02-12 09:32:19			2015-02-12	114.133	2015-02-12 07:37:51
1	3	1	x			2015-02-12 09:34:49				2015-02-12	116.967	2015-02-12 07:37:51
1	3	1	x	x		2015-02-12 09:40:08	2015-02-12 09:42:28			2015-02-12	122.283	2015-02-12 07:37:51
1	3	1	x	x		2015-02-12 09:42:52	2015-02-12 09:43:42			2015-02-12	125.017	2015-02-12 07:37:51
1	3	1	x	x		2015-02-12 09:43:47	2015-02-12 09:44:03			2015-02-12	125.933	2015-02-12 07:37:51
1	3	1	x	x		2015-02-12 09:44:25	2015-02-12 09:45:22			2015-02-12	126.567	2015-02-12 07:37:51
1	3	1	x	x		2015-02-12 09:46:14	2015-02-12 09:47:40			2015-02-12	128.383	2015-02-12 07:37:51
1	3	1	x			2015-02-12 09:48:55				2015-02-12	131.067	2015-02-12 07:37:51
1	3	1	x	x	x	2015-02-12 09:49:45	2015-02-12 09:51:37	2015-02-12 09:53:24		2015-02-12	131.9	2015-02-12 07:37:51
1	3	1	x	x		2015-02-12 09:54:32	2015-02-12 09:54:54			2015-02-12	136.683	2015-02-12 07:37:51
1	3	1	x	x		2015-02-12 09:55:08	2015-02-12 09:56:19			2015-02-12	137.283	2015-02-12 07:37:51
1	3	1	x	x		2015-02-12 10:00:25	2015-02-12 10:00:56			2015-02-12	142.567	2015-02-12 07:37:51
1	3	1	x	x		2015-02-12 10:03:47	2015-02-12 10:06:41			2015-02-12	145.933	2015-02-12 07:37:51
1	3	1	x	x		2015-02-12 10:13:31	2015-02-12 10:17:59			2015-02-12	155.667	2015-02-12 07:37:51
1	3	1	x			2015-02-12 10:24:51				2015-02-12	167	2015-02-12 07:37:51
1	3	1	x	x		2015-02-12 10:25:04	2015-02-12 10:26:40			2015-02-12	167.217	2015-02-12 07:37:51
1	3	1	x	x		2015-02-12 10:28:57	2015-02-12 10:47:12			2015-02-12	171.1	2015-02-12 07:37:51
1	3	1	x	x		2015-02-12 11:26:49	2015-02-12 11:27:09			2015-02-12	228.967	2015-02-12 07:37:51
1	3	1	x	x		2015-02-12 11:28:41	2015-02-12 11:28:43			2015-02-12	230.833	2015-02-12 07:37:51
1	3	1	x	x		2015-02-12 11:28:45	2015-02-12 11:29:36			2015-02-12	230.9	2015-02-12 07:37:51
1	3	1	x	x		2015-02-12 11:30:34	2015-02-12 11:30:45			2015-02-12	232.717	2015-02-12 07:37:51
1	3	1	x	x		2015-02-12 11:38:15	2015-02-12 11:39:11			2015-02-12	240.4	2015-02-12 07:37:51
1	3	1	x	x		2015-02-12 11:45:26	2015-02-12 11:45:44			2015-02-12	247.583	2015-02-12 07:37:51
1	3	1	x	x	x	2015-02-12 12:21:58	2015-02-12 12:22:01	2015-02-12 12:23:06		2015-02-12	284.117	2015-02-12 07:37:51
1	3	1	x			2015-02-12 13:38:54				2015-02-12	361.05	2015-02-12 07:37:51
1	3	2	x	x		2015-02-13 07:27:05	2015-02-13 07:27:37			2015-02-13	0	2015-02-13 07:27:05
1	3	2	x	x		2015-02-13 07:27:42	2015-02-13 07:27:44			2015-02-13	0.616667	2015-02-13 07:27:05
1	3	2	x	x		2015-02-13 07:27:46	2015-02-13 07:27:56			2015-02-13	0.683417	2015-02-13 07:27:04
1	3	2	x	x		2015-02-13 07:28:01	2015-02-13 07:28:10			2015-02-13	0.933417	2015-02-13 07:27:04
1	3	2	x	x		2015-02-13 07:28:14	2015-02-13 07:28:26			2015-02-13	1.15008	2015-02-13 07:27:04
1	3	2	x	x	x	2015-02-13 07:29:07	2015-02-13 07:31:12	2015-02-13 07:33:00		2015-02-13	2.03342	2015-02-13 07:27:04
1	3	2	x	x		2015-02-13 07:31:32	2015-02-13 07:31:35			2015-02-13	4.45008	2015-02-13 07:27:04
1	3	2	x	x		2015-02-13 07:31:44	2015-02-13 07:32:01			2015-02-13	4.65008	2015-02-13 07:27:04
1	3	2	x	x		2015-02-13 07:32:15	2015-02-13 07:32:18			2015-02-13	5.16675	2015-02-13 07:27:04
1	3	2	x	x		2015-02-13 07:32:25	2015-02-13 07:32:41			2015-02-13	5.33342	2015-02-13 07:27:04
1	3	2	x	x		2015-02-13 07:32:44	2015-02-13 07:32:46			2015-02-13	5.65008	2015-02-13 07:27:04
1	3	2	x	x		2015-02-13 07:32:52	2015-02-13 07:33:36			2015-02-13	5.78342	2015-02-13 07:27:04
1	3	2	x	x		2015-02-13 07:33:38	2015-02-13 07:33:41			2015-02-13	6.55008	2015-02-13 07:27:04
1	3	2	x			2015-02-13 07:34:15				2015-02-13	7.16675	2015-02-13 07:27:04
1	3	2	x			2015-02-13 07:35:08				2015-02-13	8.05008	2015-02-13 07:27:04
1	3	2	x			2015-02-13 07:35:20				2015-02-13	8.25008	2015-02-13 07:27:04
1	3	2	x	x		2015-02-13 07:36:11	2015-02-13 07:36:18			2015-02-13	9.10008	2015-02-13 07:27:04
1	3	2	x			2015-02-13 07:36:37				2015-02-13	9.53342	2015-02-13 07:27:04
1	3	2	x	x		2015-02-13 07:39:17	2015-02-13 07:40:21			2015-02-13	12.2001	2015-02-13 07:27:04
1	3	2	x	x		2015-02-13 07:42:06	2015-02-13 07:42:08			2015-02-13	15.0168	2015-02-13 07:27:04
1	3	2	x	x		2015-02-13 07:42:11	2015-02-13 07:43:10			2015-02-13	15.1001	2015-02-13 07:27:04
1	3	2	x	x		2015-02-13 07:43:11	2015-02-13 07:43:36			2015-02-13	16.1001	2015-02-13 07:27:04
1	3	2	x	x		2015-02-13 07:43:37	2015-02-13 07:44:32			2015-02-13	16.5334	2015-02-13 07:27:04
1	3	2	x	x		2015-02-13 07:44:40	2015-02-13 07:45:22			2015-02-13	17.5834	2015-02-13 07:27:04
1	3	2	x	x		2015-02-13 07:46:20	2015-02-13 07:47:42			2015-02-13	19.2501	2015-02-13 07:27:04
1	3	2	x	x		2015-02-13 07:48:47	2015-02-13 07:48:49			2015-02-13	21.7001	2015-02-13 07:27:04
1	3	2	x	x		2015-02-13 07:48:54	2015-02-13 07:50:10			2015-02-13	21.8168	2015-02-13 07:27:04
1	3	2	x	x	x	2015-02-13 07:52:57	2015-02-13 07:53:00	2015-02-13 07:55:00		2015-02-13	25.8668	2015-02-13 07:27:04
1	3	2	x	x		2015-02-13 07:53:24	2015-02-13 07:53:34			2015-02-13	26.3168	2015-02-13 07:27:04
1	3	2	x	x		2015-02-13 07:56:35	2015-02-13 07:57:04			2015-02-13	29.5001	2015-02-13 07:27:04
1	3	2	x	x		2015-02-13 07:58:57	2015-02-13 08:00:24			2015-02-13	31.8668	2015-02-13 07:27:04
1	3	2	x	x		2015-02-13 08:01:01	2015-02-13 08:01:07			2015-02-13	33.9334	2015-02-13 07:27:04
1	3	2	x	x		2015-02-13 08:01:10	2015-02-13 08:01:14			2015-02-13	34.0834	2015-02-13 07:27:04
1	3	2	x	x		2015-02-13 08:03:16	2015-02-13 08:03:17			2015-02-13	36.1834	2015-02-13 07:27:04
1	3	2	x	x		2015-02-13 08:07:10	2015-02-13 08:07:30			2015-02-13	40.0834	2015-02-13 07:27:04
1	3	2	x	x		2015-02-13 08:07:13	2015-02-13 08:07:32			2015-02-13	40.1334	2015-02-13 07:27:04
1	3	2	x	x		2015-02-13 08:08:12	2015-02-13 08:09:00			2015-02-13	41.1168	2015-02-13 07:27:04
1	3	2	x	x		2015-02-13 08:09:03	2015-02-13 08:09:27			2015-02-13	41.9668	2015-02-13 07:27:04
1	3	2	x	x		2015-02-13 08:15:16	2015-02-13 08:15:20			2015-02-13	48.1834	2015-02-13 07:27:04
1	3	2	x	x	x	2015-02-13 08:17:07	2015-02-13 08:17:34	2015-02-13 08:18:21		2015-02-13	50.0334	2015-02-13 07:27:04
1	3	2	x	x		2015-02-13 08:19:07	2015-02-13 08:19:55			2015-02-13	52.0334	2015-02-13 07:27:04
1	3	2	x			2015-02-13 08:23:04				2015-02-13	55.9834	2015-02-13 07:27:04
1	3	2	x	x		2015-02-13 08:23:20	2015-02-13 08:27:37			2015-02-13	56.2501	2015-02-13 07:27:04
1	3	2	x	x		2015-02-13 08:23:35	2015-02-13 08:27:39			2015-02-13	56.5001	2015-02-13 07:27:04
1	3	2	x	x		2015-02-13 08:24:45	2015-02-13 08:27:41			2015-02-13	57.6667	2015-02-13 07:27:04
1	3	2	x	x		2015-02-13 08:26:06	2015-02-13 08:26:28			2015-02-13	59.0168	2015-02-13 07:27:04
1	3	2	x	x		2015-02-13 08:27:57	2015-02-13 08:29:57			2015-02-13	60.8668	2015-02-13 07:27:04
1	3	2	x	x		2015-02-13 08:32:56	2015-02-13 08:33:12			2015-02-13	65.8501	2015-02-13 07:27:04
1	3	2	x	x		2015-02-13 08:40:24	2015-02-13 08:41:02			2015-02-13	73.3168	2015-02-13 07:27:04
1	3	2	x	x		2015-02-13 08:40:28	2015-02-13 08:41:08			2015-02-13	73.3834	2015-02-13 07:27:04
1	3	2	x	x	x	2015-02-13 08:41:13	2015-02-13 08:42:37	2015-02-13 08:42:57		2015-02-13	74.1334	2015-02-13 07:27:04
1	3	2	x	x		2015-02-13 08:41:51	2015-02-13 08:47:43			2015-02-13	74.7668	2015-02-13 07:27:04
1	3	2	x	x	x	2015-02-13 08:47:44	2015-02-13 08:48:46	2015-02-13 08:50:11		2015-02-13	80.6501	2015-02-13 07:27:04
1	3	2	x	x		2015-02-13 08:47:45	2015-02-13 08:51:14			2015-02-13	80.6668	2015-02-13 07:27:04
1	3	2	x	x		2015-02-13 08:48:22	2015-02-13 08:51:24			2015-02-13	81.2834	2015-02-13 07:27:04
1	3	2	x	x		2015-02-13 08:48:44	2015-02-13 08:52:17			2015-02-13	81.6501	2015-02-13 07:27:04
1	3	2	x	x	x	2015-02-13 08:48:52	2015-02-13 08:53:13	2015-02-13 08:53:54		2015-02-13	81.7834	2015-02-13 07:27:04
1	3	2	x	x		2015-02-13 08:49:24	2015-02-13 08:55:00			2015-02-13	82.3167	2015-02-13 07:27:04
1	3	2	x			2015-02-13 08:50:21				2015-02-13	83.2668	2015-02-13 07:27:04
1	3	2	x	x		2015-02-13 08:55:02	2015-02-13 08:56:50			2015-02-13	87.9501	2015-02-13 07:27:04
1	3	2	x	x		2015-02-13 08:57:37	2015-02-13 08:58:06			2015-02-13	90.5334	2015-02-13 07:27:04
1	3	2	x	x		2015-02-13 08:58:09	2015-02-13 08:58:22			2015-02-13	91.0668	2015-02-13 07:27:04
1	3	2	x	x		2015-02-13 08:58:27	2015-02-13 08:59:42			2015-02-13	91.3668	2015-02-13 07:27:04
1	3	2	x	x		2015-02-13 08:58:33	2015-02-13 09:00:49			2015-02-13	91.4668	2015-02-13 07:27:04
1	3	2	x	x		2015-02-13 09:01:51	2015-02-13 09:03:47			2015-02-13	94.7668	2015-02-13 07:27:04
1	3	2	x			2015-02-13 09:02:04				2015-02-13	94.9834	2015-02-13 07:27:04
1	3	2	x	x		2015-02-13 09:03:28	2015-02-13 09:05:49			2015-02-13	96.3834	2015-02-13 07:27:04
1	3	2	x	x		2015-02-13 09:04:50	2015-02-13 09:06:18			2015-02-13	97.7501	2015-02-13 07:27:04
1	3	2	x	x		2015-02-13 09:07:52	2015-02-13 09:07:59			2015-02-13	100.783	2015-02-13 07:27:04
1	3	2	x			2015-02-13 09:11:30				2015-02-13	104.417	2015-02-13 07:27:04
1	3	2	x			2015-02-13 09:12:57				2015-02-13	105.867	2015-02-13 07:27:04
1	3	2	x			2015-02-13 09:18:09				2015-02-13	111.067	2015-02-13 07:27:04
1	3	2	x	x		2015-02-13 09:35:13	2015-02-13 09:35:35			2015-02-13	128.133	2015-02-13 07:27:04
1	3	2	x	x		2015-02-13 09:37:46	2015-02-13 09:38:07			2015-02-13	130.683	2015-02-13 07:27:04
1	3	2	x	x		2015-02-13 09:40:36	2015-02-13 09:41:33			2015-02-13	133.517	2015-02-13 07:27:04
1	3	2	x	x		2015-02-13 09:41:31	2015-02-13 09:42:38			2015-02-13	134.433	2015-02-13 07:27:04
1	3	2	x	x		2015-02-13 09:51:17	2015-02-13 09:53:51			2015-02-13	144.2	2015-02-13 07:27:04
1	3	2	x	x		2015-02-13 09:54:46	2015-02-13 09:56:01			2015-02-13	147.683	2015-02-13 07:27:04
1	3	2	x			2015-02-13 10:09:24				2015-02-13	162.317	2015-02-13 07:27:04
1	3	2	x			2015-02-13 10:19:28				2015-02-13	172.383	2015-02-13 07:27:04
1	3	2	x			2015-02-13 10:19:30				2015-02-13	172.417	2015-02-13 07:27:04
1	3	2	x	x		2015-02-13 10:39:42	2015-02-13 10:39:44			2015-02-13	192.617	2015-02-13 07:27:04
1	3	2	x	x		2015-02-13 10:39:45	2015-02-13 10:39:47			2015-02-13	192.667	2015-02-13 07:27:04
1	3	2	x	x		2015-02-13 10:45:55	2015-02-13 10:50:34			2015-02-13	198.833	2015-02-13 07:27:04
1	3	2	x	x		2015-02-13 11:25:43	2015-02-13 11:26:38			2015-02-13	238.633	2015-02-13 07:27:04
1	3	2	x	x		2015-02-13 11:27:06	2015-02-13 11:27:10			2015-02-13	240.017	2015-02-13 07:27:04
1	3	2	x			2015-02-13 11:41:27				2015-02-13	254.367	2015-02-13 07:27:04
1	3	2	x			2015-02-13 11:48:42				2015-02-13	261.617	2015-02-13 07:27:04
1	3	2	x			2015-02-13 14:14:32				2015-02-13	407.45	2015-02-13 07:27:04
1	3	2	x	x		2015-02-13 15:19:24	2015-02-13 15:42:27			2015-02-13	472.317	2015-02-13 07:27:04
1	4	1	x	x		2015-02-16 06:57:00	2015-02-16 07:02:00			2015-02-16	0	2015-02-16 06:57:00
1	4	1	x	x	x	2015-02-16 06:57:00	2015-02-16 07:05:00	2015-02-16 08:13:00		2015-02-16	0	2015-02-16 06:57:00
1	4	1	x	x	x	2015-02-16 06:57:00	2015-02-16 07:06:00	2015-02-16 08:13:00		2015-02-16	8.33266e-05	2015-02-16 06:56:59
1	4	1	x	x		2015-02-16 06:57:00	2015-02-16 07:06:00			2015-02-16	8.33266e-05	2015-02-16 06:56:59
1	4	1	x	x		2015-02-16 06:57:00	2015-02-16 07:10:00			2015-02-16	8.33266e-05	2015-02-16 06:56:59
1	4	1	x	x		2015-02-16 06:57:00	2015-02-16 07:10:00			2015-02-16	8.33266e-05	2015-02-16 06:56:59
1	4	1	x	x		2015-02-16 06:57:00	2015-02-16 07:12:00			2015-02-16	8.33266e-05	2015-02-16 06:56:59
1	4	1	x	x		2015-02-16 06:57:00	2015-02-16 07:14:00			2015-02-16	8.33266e-05	2015-02-16 06:56:59
1	4	1	x	x		2015-02-16 06:57:00	2015-02-16 07:14:00			2015-02-16	8.33266e-05	2015-02-16 06:56:59
1	4	1	x	x		2015-02-16 06:57:00	2015-02-16 07:16:00			2015-02-16	8.33266e-05	2015-02-16 06:56:59
1	4	1	x	x		2015-02-16 06:57:00	2015-02-16 07:18:00			2015-02-16	8.33266e-05	2015-02-16 06:56:59
1	4	1	x	x		2015-02-16 06:58:00	2015-02-16 07:19:00			2015-02-16	1.00008	2015-02-16 06:56:59
1	4	1	x	x		2015-02-16 06:58:00	2015-02-16 07:19:00			2015-02-16	1.00008	2015-02-16 06:56:59
1	4	1	x	x		2015-02-16 07:00:00	2015-02-16 07:21:00			2015-02-16	3.00008	2015-02-16 06:56:59
1	4	1	x	x		2015-02-16 07:01:00	2015-02-16 07:22:00			2015-02-16	4.00008	2015-02-16 06:56:59
1	4	1	x	x	x	2015-02-16 07:05:00	2015-02-16 07:23:00	2015-02-16 08:13:00		2015-02-16	8.00008	2015-02-16 06:56:59
1	4	1	x	x	x	2015-02-16 07:06:00	2015-02-16 07:24:00	2015-02-16 08:13:00		2015-02-16	9.00008	2015-02-16 06:56:59
1	4	1	x	x	x	2015-02-16 07:06:00	2015-02-16 07:25:00	2015-02-16 08:13:00		2015-02-16	9.00008	2015-02-16 06:56:59
1	4	1	x	x		2015-02-16 07:12:00	2015-02-16 07:26:00			2015-02-16	15.0001	2015-02-16 06:56:59
1	4	1	x	x		2015-02-16 07:14:00	2015-02-16 07:29:00			2015-02-16	17.0001	2015-02-16 06:56:59
1	4	1	x	x		2015-02-16 07:15:00	2015-02-16 07:30:00			2015-02-16	18.0001	2015-02-16 06:56:59
1	4	1	x	x		2015-02-16 07:15:00	2015-02-16 07:31:00			2015-02-16	18.0001	2015-02-16 06:56:59
1	4	1	x	x		2015-02-16 07:15:00	2015-02-16 07:32:00			2015-02-16	18.0001	2015-02-16 06:56:59
1	4	1	x	x		2015-02-16 07:16:00	2015-02-16 07:33:00			2015-02-16	19.0001	2015-02-16 06:56:59
1	4	1	x	x		2015-02-16 07:20:00	2015-02-16 07:33:00			2015-02-16	23.0001	2015-02-16 06:56:59
1	4	1	x	x		2015-02-16 07:20:00	2015-02-16 07:34:00			2015-02-16	23.0001	2015-02-16 06:56:59
1	4	1	x	x	x	2015-02-16 07:20:00	2015-02-16 07:35:00	2015-02-16 08:13:00		2015-02-16	23.0001	2015-02-16 06:56:59
1	4	1	x	x		2015-02-16 07:21:00	2015-02-16 07:41:00			2015-02-16	24.0001	2015-02-16 06:56:59
1	4	1	x	x		2015-02-16 07:23:00	2015-02-16 07:43:00			2015-02-16	26.0001	2015-02-16 06:56:59
1	4	1	x	x	x	2015-02-16 07:26:00	2015-02-16 07:43:00	2015-02-16 08:14:00		2015-02-16	29.0001	2015-02-16 06:56:59
1	4	1	x	x		2015-02-16 07:26:00	2015-02-16 07:48:00			2015-02-16	29.0001	2015-02-16 06:56:59
1	4	1	x	x		2015-02-16 07:26:00	2015-02-16 07:49:00			2015-02-16	29.0001	2015-02-16 06:56:59
1	4	1	x	x		2015-02-16 07:28:00	2015-02-16 07:50:00			2015-02-16	31.0001	2015-02-16 06:56:59
1	4	1	x	x		2015-02-16 07:28:00	2015-02-16 07:53:00			2015-02-16	31.0001	2015-02-16 06:56:59
1	4	1	x	x		2015-02-16 07:33:00	2015-02-16 07:57:00			2015-02-16	36.0001	2015-02-16 06:56:59
1	4	1	x	x		2015-02-16 07:33:00	2015-02-16 08:03:00			2015-02-16	36.0001	2015-02-16 06:56:59
1	4	1	x	x		2015-02-16 07:33:00	2015-02-16 08:04:00			2015-02-16	36.0001	2015-02-16 06:56:59
1	4	1	x	x		2015-02-16 07:41:00	2015-02-16 08:08:00			2015-02-16	44.0001	2015-02-16 06:56:59
1	4	1	x	x		2015-02-16 07:42:00	2015-02-16 08:09:00			2015-02-16	45.0001	2015-02-16 06:56:59
1	4	1	x	x		2015-02-16 07:47:00	2015-02-16 08:09:00			2015-02-16	50.0001	2015-02-16 06:56:59
1	4	1	x	x		2015-02-16 07:48:00	2015-02-16 08:10:00			2015-02-16	51.0001	2015-02-16 06:56:59
1	4	1	x	x		2015-02-16 07:48:00	2015-02-16 08:11:00			2015-02-16	51.0001	2015-02-16 06:56:59
1	4	1	x	x		2015-02-16 07:49:00	2015-02-16 08:14:00			2015-02-16	52.0001	2015-02-16 06:56:59
1	4	1	x	x		2015-02-16 07:50:00	2015-02-16 08:16:00			2015-02-16	53.0001	2015-02-16 06:56:59
1	4	1	x	x		2015-02-16 07:53:00	2015-02-16 08:17:00			2015-02-16	56.0001	2015-02-16 06:56:59
1	4	1	x	x		2015-02-16 07:57:00	2015-02-16 08:17:00			2015-02-16	60.0001	2015-02-16 06:56:59
1	4	1	x	x		2015-02-16 07:57:00	2015-02-16 08:18:00			2015-02-16	60.0001	2015-02-16 06:56:59
1	4	1	x	x		2015-02-16 07:57:00	2015-02-16 08:18:00			2015-02-16	60.0001	2015-02-16 06:56:59
1	4	1	x	x		2015-02-16 08:00:00	2015-02-16 08:19:00			2015-02-16	63.0001	2015-02-16 06:56:59
1	4	1	x	x		2015-02-16 08:00:00	2015-02-16 08:20:00			2015-02-16	63.0001	2015-02-16 06:56:59
1	4	1	x	x		2015-02-16 08:02:00	2015-02-16 08:22:00			2015-02-16	65.0001	2015-02-16 06:56:59
1	4	1	x	x		2015-02-16 08:02:00	2015-02-16 08:22:00			2015-02-16	65.0001	2015-02-16 06:56:59
1	4	1	x	x		2015-02-16 08:03:00	2015-02-16 08:23:00			2015-02-16	66.0001	2015-02-16 06:56:59
1	4	1	x	x		2015-02-16 08:05:00	2015-02-16 08:27:00			2015-02-16	68.0001	2015-02-16 06:56:59
1	4	1	x	x		2015-02-16 08:05:00	2015-02-16 08:29:00			2015-02-16	68.0001	2015-02-16 06:56:59
1	4	1	x	x		2015-02-16 08:08:00	2015-02-16 08:29:00			2015-02-16	71.0001	2015-02-16 06:56:59
1	4	1	x	x		2015-02-16 08:08:00	2015-02-16 08:30:00			2015-02-16	71.0001	2015-02-16 06:56:59
1	4	1	x	x		2015-02-16 08:09:00	2015-02-16 08:32:00			2015-02-16	72.0001	2015-02-16 06:56:59
1	4	1	x	x		2015-02-16 08:11:00	2015-02-16 08:33:00			2015-02-16	74.0001	2015-02-16 06:56:59
1	4	1	x	x		2015-02-16 08:12:00	2015-02-16 08:33:00			2015-02-16	75.0001	2015-02-16 06:56:59
1	4	1	x	x		2015-02-16 08:16:00	2015-02-16 08:33:00			2015-02-16	79.0001	2015-02-16 06:56:59
1	4	1	x	x		2015-02-16 08:17:00	2015-02-16 08:35:00			2015-02-16	80.0001	2015-02-16 06:56:59
1	4	1	x	x		2015-02-16 08:22:00	2015-02-16 08:35:00			2015-02-16	85.0001	2015-02-16 06:56:59
1	4	1	x	x		2015-02-16 08:22:00	2015-02-16 08:38:00			2015-02-16	85.0001	2015-02-16 06:56:59
1	4	1	x	x		2015-02-16 08:23:00	2015-02-16 08:39:00			2015-02-16	86.0001	2015-02-16 06:56:59
1	4	1	x	x		2015-02-16 08:23:00	2015-02-16 08:40:00			2015-02-16	86.0001	2015-02-16 06:56:59
1	4	1	x	x		2015-02-16 08:23:00	2015-02-16 08:40:00			2015-02-16	86.0001	2015-02-16 06:56:59
1	4	1	x	x		2015-02-16 08:23:00	2015-02-16 08:41:00			2015-02-16	86.0001	2015-02-16 06:56:59
1	4	1	x	x		2015-02-16 08:25:00	2015-02-16 08:44:00			2015-02-16	88.0001	2015-02-16 06:56:59
1	4	1	x	x		2015-02-16 08:31:00	2015-02-16 08:44:00			2015-02-16	94.0001	2015-02-16 06:56:59
1	4	1	x	x		2015-02-16 08:31:00	2015-02-16 08:45:00			2015-02-16	94.0001	2015-02-16 06:56:59
1	4	1	x	x		2015-02-16 08:31:00	2015-02-16 08:46:00			2015-02-16	94.0001	2015-02-16 06:56:59
1	4	1	x	x		2015-02-16 08:34:00	2015-02-16 08:46:00			2015-02-16	97.0001	2015-02-16 06:56:59
1	4	1	x	x		2015-02-16 08:39:00	2015-02-16 08:48:00			2015-02-16	102	2015-02-16 06:56:59
1	4	1	x	x		2015-02-16 08:40:00	2015-02-16 08:54:00			2015-02-16	103	2015-02-16 06:56:59
1	4	1	x	x		2015-02-16 08:43:00	2015-02-16 08:55:00			2015-02-16	106	2015-02-16 06:56:59
1	4	1	x	x		2015-02-16 08:48:00	2015-02-16 08:55:00			2015-02-16	111	2015-02-16 06:56:59
1	4	1	x	x		2015-02-16 08:48:00	2015-02-16 08:56:00			2015-02-16	111	2015-02-16 06:56:59
1	4	1	x	x		2015-02-16 08:48:00	2015-02-16 08:57:00			2015-02-16	111	2015-02-16 06:56:59
1	4	1	x	x		2015-02-16 08:50:00	2015-02-16 09:00:00			2015-02-16	113	2015-02-16 06:56:59
1	4	1	x	x		2015-02-16 09:01:00	2015-02-16 09:04:00			2015-02-16	124	2015-02-16 06:56:59
1	4	1	x	x		2015-02-16 09:03:00	2015-02-16 09:05:00			2015-02-16	126	2015-02-16 06:56:59
1	4	1	x	x		2015-02-16 09:03:00	2015-02-16 09:05:00			2015-02-16	126	2015-02-16 06:56:59
1	4	1	x	x		2015-02-16 09:03:00	2015-02-16 09:06:00			2015-02-16	126	2015-02-16 06:56:59
1	4	1	x	x		2015-02-16 09:13:00	2015-02-16 09:13:00			2015-02-16	136	2015-02-16 06:56:59
1	4	1	x	x		2015-02-16 09:27:00	2015-02-16 09:27:00			2015-02-16	150	2015-02-16 06:56:59
1	4	1	x	x		2015-02-16 09:27:00	2015-02-16 09:28:00			2015-02-16	150	2015-02-16 06:56:59
1	4	1	x	x		2015-02-16 09:28:00	2015-02-16 09:32:00			2015-02-16	151	2015-02-16 06:56:59
1	4	1	x	x		2015-02-16 09:32:00	2015-02-16 09:33:00			2015-02-16	155	2015-02-16 06:56:59
1	4	1	x	x		2015-02-16 09:32:00	2015-02-16 09:33:00			2015-02-16	155	2015-02-16 06:56:59
1	4	1	x	x		2015-02-16 09:35:00	2015-02-16 09:37:00			2015-02-16	158	2015-02-16 06:56:59
1	4	1	x	x		2015-02-16 09:40:00	2015-02-16 09:41:00			2015-02-16	163	2015-02-16 06:56:59
1	4	1	x	x		2015-02-16 09:40:00	2015-02-16 09:42:00			2015-02-16	163	2015-02-16 06:56:59
1	4	1	x	x		2015-02-16 09:53:00	2015-02-16 09:54:00			2015-02-16	176	2015-02-16 06:56:59
1	4	1	x	x		2015-02-16 09:55:00	2015-02-16 09:59:00			2015-02-16	178	2015-02-16 06:56:59
1	4	1	x	x		2015-02-16 09:58:00	2015-02-16 09:58:00			2015-02-16	181	2015-02-16 06:56:59
1	4	1	x	x		2015-02-16 10:00:00	2015-02-16 10:00:00			2015-02-16	183	2015-02-16 06:56:59
1	4	1	x	x		2015-02-16 10:10:00	2015-02-16 10:11:00			2015-02-16	193	2015-02-16 06:56:59
1	4	1	x	x		2015-02-16 10:10:00	2015-02-16 10:11:00			2015-02-16	193	2015-02-16 06:56:59
1	4	1	x	x		2015-02-16 10:15:00	2015-02-16 10:17:00			2015-02-16	198	2015-02-16 06:56:59
1	4	1	x	x		2015-02-16 10:15:00	2015-02-16 10:17:00			2015-02-16	198	2015-02-16 06:56:59
1	4	1	x	x		2015-02-16 10:55:00	2015-02-16 10:58:00			2015-02-16	238	2015-02-16 06:56:59
1	4	1	x	x	x	2015-02-16 11:12:00	2015-02-16 11:12:00	2015-02-16 11:20:00		2015-02-16	255	2015-02-16 06:56:59
1	4	1	x	x		2015-02-16 11:14:00	2015-02-16 11:14:00			2015-02-16	257	2015-02-16 06:56:59
1	4	1	x	x		2015-02-16 11:16:00	2015-02-16 11:17:00			2015-02-16	259	2015-02-16 06:56:59
1	4	1	x	x		2015-02-16 11:47:00	2015-02-16 11:48:00			2015-02-16	290	2015-02-16 06:56:59
1	4	1	x	x		2015-02-16 11:59:00	2015-02-16 11:59:00			2015-02-16	302	2015-02-16 06:56:59
1	4	1	x	x		2015-02-16 14:05:00	2015-02-16 14:06:00			2015-02-16	428	2015-02-16 06:56:59
1	4	2	x	x		2015-02-17 07:03:25	2015-02-17 07:09:23			2015-02-17	0	2015-02-17 07:03:25
1	4	2	x	x	x	2015-02-17 07:04:26	2015-02-17 07:10:38	2015-02-17 08:09:43		2015-02-17	1.01667	2015-02-17 07:03:25
1	4	2	x	x		2015-02-17 07:04:33	2015-02-17 07:15:04			2015-02-17	1.13342	2015-02-17 07:03:24
1	4	2	x	x		2015-02-17 07:04:53	2015-02-17 07:16:01			2015-02-17	1.46675	2015-02-17 07:03:24
1	4	2	x	x		2015-02-17 07:05:29	2015-02-17 07:16:35			2015-02-17	2.06675	2015-02-17 07:03:24
1	4	2	x	x		2015-02-17 07:05:38	2015-02-17 07:17:25			2015-02-17	2.21675	2015-02-17 07:03:24
1	4	2	x	x		2015-02-17 07:05:44	2015-02-17 07:19:43			2015-02-17	2.31675	2015-02-17 07:03:24
1	4	2	x	x		2015-02-17 07:08:27	2015-02-17 07:20:19			2015-02-17	5.03342	2015-02-17 07:03:24
1	4	2	x	x		2015-02-17 07:08:29	2015-02-17 07:21:49			2015-02-17	5.06675	2015-02-17 07:03:24
1	4	2	x	x		2015-02-17 07:08:31	2015-02-17 07:22:26			2015-02-17	5.10008	2015-02-17 07:03:24
1	4	2	x	x		2015-02-17 07:08:34	2015-02-17 07:23:09			2015-02-17	5.15008	2015-02-17 07:03:24
1	4	2	x	x		2015-02-17 07:09:06	2015-02-17 07:23:48			2015-02-17	5.68342	2015-02-17 07:03:24
1	4	2	x	x		2015-02-17 07:12:51	2015-02-17 07:24:28			2015-02-17	9.43342	2015-02-17 07:03:24
1	4	2	x	x		2015-02-17 07:15:39	2015-02-17 07:25:04			2015-02-17	12.2334	2015-02-17 07:03:24
1	4	2	x	x		2015-02-17 07:19:49	2015-02-17 07:26:04			2015-02-17	16.4001	2015-02-17 07:03:24
1	4	2	x	x		2015-02-17 07:20:36	2015-02-17 07:33:55			2015-02-17	17.1834	2015-02-17 07:03:24
1	4	2	x	x		2015-02-17 07:20:38	2015-02-17 07:34:34			2015-02-17	17.2168	2015-02-17 07:03:24
1	4	2	x	x		2015-02-17 07:23:17	2015-02-17 07:35:29			2015-02-17	19.8668	2015-02-17 07:03:24
1	4	2	x	x		2015-02-17 07:24:11	2015-02-17 07:36:59			2015-02-17	20.7668	2015-02-17 07:03:24
1	4	2	x	x		2015-02-17 07:28:02	2015-02-17 07:37:20			2015-02-17	24.6168	2015-02-17 07:03:24
1	4	2	x	x		2015-02-17 07:29:52	2015-02-17 07:37:58			2015-02-17	26.4501	2015-02-17 07:03:24
1	4	2	x	x		2015-02-17 07:32:05	2015-02-17 07:38:36			2015-02-17	28.6668	2015-02-17 07:03:24
1	4	2	x	x		2015-02-17 07:32:06	2015-02-17 07:39:34			2015-02-17	28.6834	2015-02-17 07:03:24
1	4	2	x	x		2015-02-17 07:34:21	2015-02-17 07:40:41			2015-02-17	30.9334	2015-02-17 07:03:24
1	4	2	x	x		2015-02-17 07:34:29	2015-02-17 07:41:35			2015-02-17	31.0668	2015-02-17 07:03:24
1	4	2	x	x		2015-02-17 07:35:31	2015-02-17 07:42:44			2015-02-17	32.1001	2015-02-17 07:03:24
1	4	2	x	x		2015-02-17 07:35:56	2015-02-17 07:44:10			2015-02-17	32.5168	2015-02-17 07:03:24
1	4	2	x	x		2015-02-17 07:36:44	2015-02-17 07:44:24			2015-02-17	33.3168	2015-02-17 07:03:24
1	4	2	x	x		2015-02-17 07:39:53	2015-02-17 07:46:33			2015-02-17	36.4667	2015-02-17 07:03:24
1	4	2	x	x		2015-02-17 07:40:27	2015-02-17 07:46:57			2015-02-17	37.0334	2015-02-17 07:03:24
1	4	2	x	x		2015-02-17 07:41:43	2015-02-17 07:47:14			2015-02-17	38.3001	2015-02-17 07:03:24
1	4	2	x	x		2015-02-17 07:42:12	2015-02-17 07:48:39			2015-02-17	38.7834	2015-02-17 07:03:24
1	4	2	x	x		2015-02-17 07:43:05	2015-02-17 07:48:58			2015-02-17	39.6668	2015-02-17 07:03:24
1	4	2	x	x		2015-02-17 07:44:46	2015-02-17 07:49:24			2015-02-17	41.3501	2015-02-17 07:03:24
1	4	2	x	x	x	2015-02-17 07:51:33	2015-02-17 07:51:39	2015-02-17 08:28:34		2015-02-17	48.1334	2015-02-17 07:03:24
1	4	2	x	x		2015-02-17 07:51:41	2015-02-17 07:52:23			2015-02-17	48.2668	2015-02-17 07:03:24
1	4	2	x	x		2015-02-17 07:52:32	2015-02-17 07:52:52			2015-02-17	49.1168	2015-02-17 07:03:24
1	4	2	x	x		2015-02-17 07:53:42	2015-02-17 07:55:54			2015-02-17	50.2834	2015-02-17 07:03:24
1	4	2	x	x		2015-02-17 07:53:44	2015-02-17 07:56:37			2015-02-17	50.3167	2015-02-17 07:03:24
1	4	2	x	x		2015-02-17 07:55:01	2015-02-17 08:00:53			2015-02-17	51.6001	2015-02-17 07:03:24
1	4	2	x	x		2015-02-17 07:55:56	2015-02-17 08:02:16			2015-02-17	52.5168	2015-02-17 07:03:24
1	4	2	x	x		2015-02-17 07:56:50	2015-02-17 08:02:56			2015-02-17	53.4168	2015-02-17 07:03:24
1	4	2	x	x		2015-02-17 07:58:37	2015-02-17 08:03:27			2015-02-17	55.2001	2015-02-17 07:03:24
1	4	2	x	x		2015-02-17 08:00:04	2015-02-17 08:04:24			2015-02-17	56.6501	2015-02-17 07:03:24
1	4	2	x	x		2015-02-17 08:03:23	2015-02-17 08:04:36			2015-02-17	59.9668	2015-02-17 07:03:24
1	4	2	x	x		2015-02-17 08:03:48	2015-02-17 08:05:36			2015-02-17	60.3834	2015-02-17 07:03:24
1	4	2	x	x		2015-02-17 08:03:54	2015-02-17 08:06:27			2015-02-17	60.4834	2015-02-17 07:03:24
1	4	2	x	x		2015-02-17 08:05:39	2015-02-17 08:06:51			2015-02-17	62.2334	2015-02-17 07:03:24
1	4	2	x	x		2015-02-17 08:05:41	2015-02-17 08:09:49			2015-02-17	62.2668	2015-02-17 07:03:24
1	4	2	x	x		2015-02-17 08:05:43	2015-02-17 08:11:09			2015-02-17	62.3001	2015-02-17 07:03:24
1	4	2	x	x		2015-02-17 08:06:18	2015-02-17 08:11:45			2015-02-17	62.8834	2015-02-17 07:03:24
1	4	2	x	x		2015-02-17 08:06:25	2015-02-17 08:14:32			2015-02-17	63.0001	2015-02-17 07:03:24
1	4	2	x	x		2015-02-17 08:08:54	2015-02-17 08:15:19			2015-02-17	65.4834	2015-02-17 07:03:24
1	4	2	x	x		2015-02-17 08:09:02	2015-02-17 08:15:49			2015-02-17	65.6168	2015-02-17 07:03:24
1	4	2	x	x		2015-02-17 08:14:14	2015-02-17 08:16:18			2015-02-17	70.8168	2015-02-17 07:03:24
1	4	2	x	x		2015-02-17 08:15:34	2015-02-17 08:16:20			2015-02-17	72.1501	2015-02-17 07:03:24
1	4	2	x	x		2015-02-17 08:17:11	2015-02-17 08:18:41			2015-02-17	73.7668	2015-02-17 07:03:24
1	4	2	x	x		2015-02-17 08:21:11	2015-02-17 08:31:05			2015-02-17	77.7668	2015-02-17 07:03:24
1	4	2	x	x		2015-02-17 08:22:05	2015-02-17 08:32:55			2015-02-17	78.6668	2015-02-17 07:03:24
1	4	2	x	x		2015-02-17 08:22:30	2015-02-17 08:34:24			2015-02-17	79.0834	2015-02-17 07:03:24
1	4	2	x	x		2015-02-17 08:24:07	2015-02-17 08:35:08			2015-02-17	80.7001	2015-02-17 07:03:24
1	4	2	x	x		2015-02-17 08:28:18	2015-02-17 08:36:22			2015-02-17	84.8834	2015-02-17 07:03:24
1	4	2	x	x	x	2015-02-17 08:30:26	2015-02-17 08:36:40	2015-02-17 08:52:08		2015-02-17	87.0168	2015-02-17 07:03:24
1	4	2	x	x		2015-02-17 08:32:50	2015-02-17 08:37:52			2015-02-17	89.4168	2015-02-17 07:03:24
1	4	2	x	x		2015-02-17 08:36:01	2015-02-17 08:38:46			2015-02-17	92.6001	2015-02-17 07:03:24
1	4	2	x	x		2015-02-17 08:38:01	2015-02-17 08:40:32			2015-02-17	94.6001	2015-02-17 07:03:24
1	4	2	x	x		2015-02-17 08:39:23	2015-02-17 08:41:47			2015-02-17	95.9668	2015-02-17 07:03:24
1	4	2	x	x		2015-02-17 08:39:25	2015-02-17 08:42:44			2015-02-17	96.0001	2015-02-17 07:03:24
1	4	2	x	x		2015-02-17 08:42:12	2015-02-17 08:43:27			2015-02-17	98.7834	2015-02-17 07:03:24
1	4	2	x	x		2015-02-17 08:42:19	2015-02-17 08:43:48			2015-02-17	98.9001	2015-02-17 07:03:24
1	4	2	x	x		2015-02-17 08:42:24	2015-02-17 08:44:29			2015-02-17	98.9834	2015-02-17 07:03:24
1	4	2	x	x		2015-02-17 08:47:46	2015-02-17 08:48:38			2015-02-17	104.35	2015-02-17 07:03:24
1	4	2	x	x		2015-02-17 08:48:33	2015-02-17 08:49:05			2015-02-17	105.133	2015-02-17 07:03:24
1	4	2	x	x		2015-02-17 08:52:16	2015-02-17 08:53:27			2015-02-17	108.85	2015-02-17 07:03:24
1	4	2	x	x		2015-02-17 08:53:44	2015-02-17 08:54:10			2015-02-17	110.317	2015-02-17 07:03:24
1	4	2	x	x		2015-02-17 08:58:07	2015-02-17 08:58:25			2015-02-17	114.7	2015-02-17 07:03:24
1	4	2	x	x		2015-02-17 08:59:41	2015-02-17 08:59:45			2015-02-17	116.267	2015-02-17 07:03:24
1	4	2	x	x		2015-02-17 09:01:34	2015-02-17 09:02:03			2015-02-17	118.15	2015-02-17 07:03:24
1	4	2	x	x		2015-02-17 09:01:35	2015-02-17 09:02:05			2015-02-17	118.167	2015-02-17 07:03:24
1	4	2	x	x		2015-02-17 09:02:16	2015-02-17 09:02:22			2015-02-17	118.85	2015-02-17 07:03:24
1	4	2	x	x		2015-02-17 09:10:03	2015-02-17 09:10:10			2015-02-17	126.633	2015-02-17 07:03:24
1	4	2	x	x		2015-02-17 09:10:05	2015-02-17 09:10:33			2015-02-17	126.667	2015-02-17 07:03:24
1	4	2	x	x		2015-02-17 09:18:52	2015-02-17 09:19:15			2015-02-17	135.45	2015-02-17 07:03:24
1	4	2	x	x		2015-02-17 09:19:02	2015-02-17 09:19:30			2015-02-17	135.617	2015-02-17 07:03:24
1	4	2	x	x		2015-02-17 09:30:20	2015-02-17 09:30:39			2015-02-17	146.917	2015-02-17 07:03:24
1	4	2	x	x		2015-02-17 09:30:58	2015-02-17 09:31:27			2015-02-17	147.55	2015-02-17 07:03:24
1	4	2	x	x		2015-02-17 09:31:00	2015-02-17 09:33:06			2015-02-17	147.583	2015-02-17 07:03:24
1	4	2	x	x		2015-02-17 09:31:58	2015-02-17 09:33:41			2015-02-17	148.55	2015-02-17 07:03:24
1	4	2	x	x		2015-02-17 09:33:44	2015-02-17 09:35:05			2015-02-17	150.317	2015-02-17 07:03:24
1	4	2	x	x		2015-02-17 09:34:33	2015-02-17 09:35:12			2015-02-17	151.133	2015-02-17 07:03:24
1	4	2	x	x		2015-02-17 09:35:37	2015-02-17 09:36:19			2015-02-17	152.2	2015-02-17 07:03:24
1	4	2	x	x		2015-02-17 09:37:03	2015-02-17 09:37:56			2015-02-17	153.633	2015-02-17 07:03:24
1	4	2	x	x		2015-02-17 09:38:18	2015-02-17 09:38:32			2015-02-17	154.883	2015-02-17 07:03:24
1	4	2	x	x		2015-02-17 10:05:22	2015-02-17 10:05:38			2015-02-17	181.95	2015-02-17 07:03:24
1	4	2	x	x		2015-02-17 10:12:59	2015-02-17 10:13:14			2015-02-17	189.567	2015-02-17 07:03:24
1	4	2	x	x		2015-02-17 10:15:28	2015-02-17 10:17:07			2015-02-17	192.05	2015-02-17 07:03:24
1	4	2	x	x		2015-02-17 10:24:05	2015-02-17 10:25:34			2015-02-17	200.667	2015-02-17 07:03:24
1	4	2	x	x	x	2015-02-17 10:32:42	2015-02-17 10:32:45	2015-02-17 10:32:50		2015-02-17	209.283	2015-02-17 07:03:24
1	4	2	x	x	x	2015-02-17 10:33:24	2015-02-17 10:33:39	2015-02-17 10:36:18		2015-02-17	209.983	2015-02-17 07:03:24
1	4	2	x	x		2015-02-17 10:33:27	2015-02-17 10:36:37			2015-02-17	210.033	2015-02-17 07:03:24
1	4	2	x	x		2015-02-17 10:36:46	2015-02-17 10:36:53			2015-02-17	213.35	2015-02-17 07:03:24
1	4	2	x	x		2015-02-17 11:12:14	2015-02-17 11:12:15			2015-02-17	248.817	2015-02-17 07:03:24
1	4	2	x	x		2015-02-17 11:15:27	2015-02-17 11:15:28			2015-02-17	252.033	2015-02-17 07:03:24
1	4	2	x	x		2015-02-17 11:15:42	2015-02-17 11:15:57			2015-02-17	252.283	2015-02-17 07:03:24
1	4	2	x	x	x	2015-02-17 11:27:40	2015-02-17 11:27:47	2015-02-17 11:28:39		2015-02-17	264.25	2015-02-17 07:03:24
1	4	2	x	x		2015-02-17 11:27:53	2015-02-17 11:29:09			2015-02-17	264.467	2015-02-17 07:03:24
1	4	2	x	x	x	2015-02-17 11:33:49	2015-02-17 11:34:10	2015-02-17 11:40:08		2015-02-17	270.4	2015-02-17 07:03:24
1	4	2	x	x	x	2015-02-17 14:11:32	2015-02-17 14:11:34	2015-02-17 14:13:24		2015-02-17	428.117	2015-02-17 07:03:24
1	4	2	x	x		2015-02-17 14:15:05	2015-02-17 14:15:30			2015-02-17	431.667	2015-02-17 07:03:24
1	5	1	x	x		2015-02-18 07:32:07	2015-02-18 07:32:25			2015-02-18	0	2015-02-18 07:32:07
1	5	1	x	x		2015-02-18 07:33:56	2015-02-18 07:34:20			2015-02-18	1.81667	2015-02-18 07:32:07
1	5	1	x	x		2015-02-18 07:35:53	2015-02-18 07:36:11			2015-02-18	3.76667	2015-02-18 07:32:07
1	5	1	x	x		2015-02-18 07:40:29	2015-02-18 07:40:38			2015-02-18	8.36667	2015-02-18 07:32:07
1	5	1	x	x		2015-02-18 07:40:39	2015-02-18 07:40:47			2015-02-18	8.53333	2015-02-18 07:32:07
1	5	1	x	x		2015-02-18 07:41:15	2015-02-18 07:42:22			2015-02-18	9.13333	2015-02-18 07:32:07
1	5	1	x	x		2015-02-18 07:42:55	2015-02-18 07:43:18			2015-02-18	10.8	2015-02-18 07:32:07
1	5	1	x	x		2015-02-18 07:43:32	2015-02-18 07:43:35			2015-02-18	11.4167	2015-02-18 07:32:07
1	5	1	x	x		2015-02-18 07:46:24	2015-02-18 07:46:54			2015-02-18	14.2833	2015-02-18 07:32:07
1	5	1	x	x		2015-02-18 07:46:26	2015-02-18 07:46:55			2015-02-18	14.3167	2015-02-18 07:32:07
1	5	1	x	x		2015-02-18 07:46:27	2015-02-18 07:47:17			2015-02-18	14.3333	2015-02-18 07:32:07
1	5	1	x	x		2015-02-18 07:47:28	2015-02-18 07:48:09			2015-02-18	15.35	2015-02-18 07:32:07
1	5	1	x	x		2015-02-18 07:53:51	2015-02-18 07:54:01			2015-02-18	21.7333	2015-02-18 07:32:07
1	5	1	x	x		2015-02-18 07:54:20	2015-02-18 07:54:40			2015-02-18	22.2167	2015-02-18 07:32:07
1	5	1	x	x		2015-02-18 07:55:11	2015-02-18 07:55:20			2015-02-18	23.0667	2015-02-18 07:32:07
1	5	1	x	x		2015-02-18 07:57:55	2015-02-18 07:58:07			2015-02-18	25.8	2015-02-18 07:32:07
1	5	1	x	x		2015-02-18 07:58:26	2015-02-18 07:58:28			2015-02-18	26.3167	2015-02-18 07:32:07
1	5	1	x	x		2015-02-18 07:59:08	2015-02-18 07:59:13			2015-02-18	27.0167	2015-02-18 07:32:07
1	5	1	x	x	x	2015-02-18 08:01:07	2015-02-18 08:01:34	2015-02-18 08:02:45		2015-02-18	29	2015-02-18 07:32:07
1	5	1	x	x		2015-02-18 08:03:12	2015-02-18 08:03:28			2015-02-18	31.0833	2015-02-18 07:32:07
1	5	1	x	x		2015-02-18 08:03:38	2015-02-18 08:03:53			2015-02-18	31.5167	2015-02-18 07:32:07
1	5	1	x	x		2015-02-18 08:04:28	2015-02-18 08:04:30			2015-02-18	32.35	2015-02-18 07:32:07
1	5	1	x	x		2015-02-18 08:04:36	2015-02-18 08:04:52			2015-02-18	32.4833	2015-02-18 07:32:07
1	5	1	x	x		2015-02-18 08:06:12	2015-02-18 08:06:26			2015-02-18	34.0833	2015-02-18 07:32:07
1	5	1	x	x		2015-02-18 08:10:05	2015-02-18 08:10:11			2015-02-18	37.9667	2015-02-18 07:32:07
1	5	1	x	x		2015-02-18 08:24:55	2015-02-18 08:25:11			2015-02-18	52.8	2015-02-18 07:32:07
1	5	1	x	x		2015-02-18 08:25:23	2015-02-18 08:25:33			2015-02-18	53.2667	2015-02-18 07:32:07
1	5	1	x	x		2015-02-18 08:27:03	2015-02-18 08:27:28			2015-02-18	54.9333	2015-02-18 07:32:07
1	5	1	x	x		2015-02-18 08:27:42	2015-02-18 08:28:00			2015-02-18	55.5833	2015-02-18 07:32:07
1	5	1	x	x		2015-02-18 08:29:28	2015-02-18 08:30:17			2015-02-18	57.35	2015-02-18 07:32:07
1	5	1	x	x	x	2015-02-18 08:33:00	2015-02-18 08:33:10	2015-02-18 08:35:56		2015-02-18	60.8833	2015-02-18 07:32:07
1	5	1	x	x		2015-02-18 08:36:58	2015-02-18 08:37:42			2015-02-18	64.85	2015-02-18 07:32:07
1	5	1	x	x		2015-02-18 08:39:48	2015-02-18 08:40:11			2015-02-18	67.6833	2015-02-18 07:32:07
1	5	1	x	x		2015-02-18 08:40:41	2015-02-18 08:41:24			2015-02-18	68.5667	2015-02-18 07:32:07
1	5	1	x	x		2015-02-18 08:46:59	2015-02-18 08:47:05			2015-02-18	74.8667	2015-02-18 07:32:07
1	5	1	x	x		2015-02-18 08:49:32	2015-02-18 08:49:37			2015-02-18	77.4167	2015-02-18 07:32:07
1	5	1	x	x		2015-02-18 08:56:05	2015-02-18 08:56:35			2015-02-18	83.9667	2015-02-18 07:32:07
1	5	1	x	x		2015-02-18 08:56:13	2015-02-18 08:56:37			2015-02-18	84.1	2015-02-18 07:32:07
1	5	1	x	x		2015-02-18 08:56:15	2015-02-18 08:56:41			2015-02-18	84.1333	2015-02-18 07:32:07
1	5	1	x	x		2015-02-18 09:02:36	2015-02-18 09:02:38			2015-02-18	90.4833	2015-02-18 07:32:07
1	5	1	x	x		2015-02-18 09:13:20	2015-02-18 09:13:21			2015-02-18	101.217	2015-02-18 07:32:07
1	5	1	x	x		2015-02-18 09:14:09	2015-02-18 09:14:10			2015-02-18	102.033	2015-02-18 07:32:07
1	5	1	x	x		2015-02-18 09:14:12	2015-02-18 09:14:14			2015-02-18	102.083	2015-02-18 07:32:07
1	5	1	x	x		2015-02-18 09:34:00	2015-02-18 09:34:09			2015-02-18	121.883	2015-02-18 07:32:07
1	5	2	x	x		2015-02-19 07:40:08	2015-02-19 07:39:53			2015-02-19	0	2015-02-19 07:40:08
1	5	2	x	x		2015-02-19 07:41:05	2015-02-19 07:41:33			2015-02-19	0.95	2015-02-19 07:40:08
1	5	2	x	x		2015-02-19 07:44:42	2015-02-19 07:44:51			2015-02-19	4.56667	2015-02-19 07:40:08
1	5	2	x	x		2015-02-19 07:46:19	2015-02-19 07:47:16			2015-02-19	6.18333	2015-02-19 07:40:08
1	5	2	x	x		2015-02-19 07:51:39	2015-02-19 07:51:46			2015-02-19	11.5167	2015-02-19 07:40:08
1	5	2	x	x		2015-02-19 07:51:50	2015-02-19 07:52:26			2015-02-19	11.7	2015-02-19 07:40:08
1	5	2	x	x		2015-02-19 07:53:49	2015-02-19 07:54:58			2015-02-19	13.6833	2015-02-19 07:40:08
1	5	2	x	x		2015-02-19 07:55:31	2015-02-19 07:56:01			2015-02-19	15.3833	2015-02-19 07:40:08
1	5	2	x	x		2015-02-19 07:56:53	2015-02-19 07:57:22			2015-02-19	16.75	2015-02-19 07:40:08
1	5	2	x	x		2015-02-19 07:57:32	2015-02-19 07:58:05			2015-02-19	17.4	2015-02-19 07:40:08
1	5	2	x	x	x	2015-02-19 08:00:23	2015-02-19 08:00:47	2015-02-19 08:00:57		2015-02-19	20.25	2015-02-19 07:40:08
1	5	2	x	x		2015-02-19 08:00:24	2015-02-19 08:02:21			2015-02-19	20.2667	2015-02-19 07:40:08
1	5	2	x	x		2015-02-19 08:01:01	2015-02-19 08:03:16			2015-02-19	20.8833	2015-02-19 07:40:08
1	5	2	x	x		2015-02-19 08:03:15	2015-02-19 08:08:12			2015-02-19	23.1167	2015-02-19 07:40:08
1	5	2	x	x		2015-02-19 08:08:18	2015-02-19 08:08:22			2015-02-19	28.1667	2015-02-19 07:40:08
1	5	2	x	x		2015-02-19 08:12:05	2015-02-19 08:12:39			2015-02-19	31.95	2015-02-19 07:40:08
1	5	2	x	x		2015-02-19 08:12:41	2015-02-19 08:12:59			2015-02-19	32.55	2015-02-19 07:40:08
1	5	2	x	x		2015-02-19 08:13:36	2015-02-19 08:14:13			2015-02-19	33.4667	2015-02-19 07:40:08
1	5	2	x	x		2015-02-19 08:13:48	2015-02-19 08:14:34			2015-02-19	33.6667	2015-02-19 07:40:08
1	5	2	x	x		2015-02-19 08:17:05	2015-02-19 08:17:17			2015-02-19	36.95	2015-02-19 07:40:08
1	5	2	x	x		2015-02-19 08:17:55	2015-02-19 08:18:06			2015-02-19	37.7833	2015-02-19 07:40:08
1	5	2	x	x		2015-02-19 08:18:07	2015-02-19 08:19:25			2015-02-19	37.9833	2015-02-19 07:40:08
1	5	2	x	x		2015-02-19 08:18:11	2015-02-19 08:21:50			2015-02-19	38.05	2015-02-19 07:40:08
1	5	2	x	x		2015-02-19 08:19:43	2015-02-19 08:23:22			2015-02-19	39.5833	2015-02-19 07:40:08
1	5	2	x	x		2015-02-19 08:21:39	2015-02-19 08:25:57			2015-02-19	41.5167	2015-02-19 07:40:08
1	5	2	x	x		2015-02-19 08:24:58	2015-02-19 08:27:35			2015-02-19	44.8333	2015-02-19 07:40:08
1	5	2	x	x		2015-02-19 08:25:23	2015-02-19 08:28:57			2015-02-19	45.25	2015-02-19 07:40:08
1	5	2	x	x		2015-02-19 08:28:45	2015-02-19 08:31:53			2015-02-19	48.6167	2015-02-19 07:40:08
1	5	2	x	x		2015-02-19 08:35:26	2015-02-19 08:35:38			2015-02-19	55.3	2015-02-19 07:40:08
1	5	2	x	x		2015-02-19 08:38:23	2015-02-19 08:38:56			2015-02-19	58.25	2015-02-19 07:40:08
1	5	2	x	x		2015-02-19 08:40:27	2015-02-19 08:40:45			2015-02-19	60.3167	2015-02-19 07:40:08
1	5	2	x	x		2015-02-19 08:45:07	2015-02-19 08:46:50			2015-02-19	64.9833	2015-02-19 07:40:08
1	5	2	x	x		2015-02-19 08:45:51	2015-02-19 08:47:23			2015-02-19	65.7167	2015-02-19 07:40:08
1	5	2	x	x		2015-02-19 08:46:31	2015-02-19 08:47:43			2015-02-19	66.3833	2015-02-19 07:40:08
1	5	2	x	x	x	2015-02-19 09:00:25	2015-02-19 09:00:27	2015-02-19 09:02:04		2015-02-19	80.2833	2015-02-19 07:40:08
1	5	2	x	x		2015-02-19 09:03:57	2015-02-19 09:05:55			2015-02-19	83.8167	2015-02-19 07:40:08
1	5	2	x	x		2015-02-19 09:33:44	2015-02-19 09:33:46			2015-02-19	113.6	2015-02-19 07:40:08
1	5	2	x	x		2015-02-19 09:36:33	2015-02-19 09:36:35			2015-02-19	116.417	2015-02-19 07:40:08
1	5	2	x	x		2015-02-19 09:57:26	2015-02-19 09:57:31			2015-02-19	137.3	2015-02-19 07:40:08
1	5	2	x	x		2015-02-19 10:05:58	2015-02-19 10:06:02			2015-02-19	145.833	2015-02-19 07:40:08
1	6	1	x	x		2015-02-19 07:55:49	2015-02-19 07:56:15			2015-02-19	0	2015-02-19 07:55:49
1	6	1	x	x	x	2015-02-19 07:55:50	2015-02-19 08:13:01	2015-02-19 08:18:11		2015-02-19	0.0166667	2015-02-19 07:55:49
1	6	1	x	x	x	2015-02-19 07:55:50	2015-02-19 08:14:37	2015-02-19 08:18:16		2015-02-19	0.01675	2015-02-19 07:55:48
1	6	1	x	x		2015-02-19 07:55:51	2015-02-19 08:15:11			2015-02-19	0.0334167	2015-02-19 07:55:48
1	6	1	x	x		2015-02-19 07:55:52	2015-02-19 08:15:43			2015-02-19	0.0500833	2015-02-19 07:55:48
1	6	1	x	x		2015-02-19 07:55:52	2015-02-19 08:17:22			2015-02-19	0.0500833	2015-02-19 07:55:48
1	6	1	x	x		2015-02-19 07:55:53	2015-02-19 08:17:29			2015-02-19	0.06675	2015-02-19 07:55:48
1	6	1	x	x		2015-02-19 07:55:53	2015-02-19 08:17:49			2015-02-19	0.06675	2015-02-19 07:55:48
1	6	1	x	x		2015-02-19 07:55:54	2015-02-19 08:17:52			2015-02-19	0.0834167	2015-02-19 07:55:48
1	6	1	x	x		2015-02-19 07:55:54	2015-02-19 08:17:53			2015-02-19	0.0834167	2015-02-19 07:55:48
1	6	1	x	x		2015-02-19 07:55:55	2015-02-19 08:17:56			2015-02-19	0.100083	2015-02-19 07:55:48
1	6	1	x	x		2015-02-19 07:56:03	2015-02-19 08:18:04			2015-02-19	0.233417	2015-02-19 07:55:48
1	6	1	x	x		2015-02-19 08:08:40	2015-02-19 08:17:58			2015-02-19	12.8501	2015-02-19 07:55:48
1	6	1	x	x		2015-02-19 08:10:41	2015-02-19 08:18:00			2015-02-19	14.8668	2015-02-19 07:55:48
1	6	1	x	x		2015-02-19 08:18:34	2015-02-19 08:20:04			2015-02-19	22.7501	2015-02-19 07:55:48
1	6	1	x	x		2015-02-19 08:25:59	2015-02-19 08:30:15			2015-02-19	30.1668	2015-02-19 07:55:48
1	6	1	x	x		2015-02-19 08:31:38	2015-02-19 08:32:43			2015-02-19	35.8168	2015-02-19 07:55:48
1	6	1	x	x		2015-02-19 08:33:55	2015-02-19 08:34:20			2015-02-19	38.1001	2015-02-19 07:55:48
1	6	1	x	x	x	2015-02-19 09:48:10	2015-02-19 09:52:00	2015-02-19 10:01:33		2015-02-19	112.35	2015-02-19 07:55:48
1	6	1	x	x		2015-02-19 09:52:26	2015-02-19 10:16:40			2015-02-19	116.617	2015-02-19 07:55:48
1	6	1	x	x		2015-02-19 10:05:29	2015-02-19 10:13:44		2015-02-19 10:31:00	2015-02-19	129.667	2015-02-19 07:55:48
1	6	1	x	x		2015-02-19 10:48:01	2015-02-19 10:48:38			2015-02-19	172.2	2015-02-19 07:55:48
1	6	1	x	x		2015-02-19 11:04:47	2015-02-19 11:04:59			2015-02-19	188.967	2015-02-19 07:55:48
1	6	2	x	x		2015-02-20 07:26:13	2015-02-20 07:50:33			2015-02-20	0	2015-02-20 07:26:13
1	6	2	x	x		2015-02-20 07:26:14	2015-02-20 07:51:59			2015-02-20	0.0166667	2015-02-20 07:26:13
1	6	2	x	x		2015-02-20 07:26:20	2015-02-20 07:52:31			2015-02-20	0.11675	2015-02-20 07:26:12
1	6	2	x	x		2015-02-20 07:28:56	2015-02-20 07:53:10			2015-02-20	2.71675	2015-02-20 07:26:12
1	6	2	x	x		2015-02-20 07:29:56	2015-02-20 07:54:35			2015-02-20	3.71675	2015-02-20 07:26:12
1	6	2	x	x		2015-02-20 07:37:34	2015-02-20 08:04:22			2015-02-20	11.3501	2015-02-20 07:26:12
1	6	2	x	x		2015-02-20 07:38:47	2015-02-20 08:05:05			2015-02-20	12.5667	2015-02-20 07:26:12
1	6	2	x	x		2015-02-20 07:47:34	2015-02-20 08:07:11			2015-02-20	21.3501	2015-02-20 07:26:12
1	6	2	x	x		2015-02-20 07:53:26	2015-02-20 08:08:17			2015-02-20	27.2167	2015-02-20 07:26:12
1	6	2	x	x		2015-02-20 07:58:45	2015-02-20 08:10:03			2015-02-20	32.5334	2015-02-20 07:26:12
1	6	2	x	x		2015-02-20 08:00:08	2015-02-20 08:14:18			2015-02-20	33.9168	2015-02-20 07:26:12
1	6	2	x	x		2015-02-20 08:01:15	2015-02-20 08:15:30			2015-02-20	35.0334	2015-02-20 07:26:12
1	6	2	x	x		2015-02-20 08:01:16	2015-02-20 08:17:40			2015-02-20	35.0501	2015-02-20 07:26:12
1	6	2	x	x		2015-02-20 08:01:56	2015-02-20 08:22:11			2015-02-20	35.7168	2015-02-20 07:26:12
1	6	2	x	x		2015-02-20 08:08:45	2015-02-20 08:23:49			2015-02-20	42.5334	2015-02-20 07:26:12
1	6	2	x	x	x	2015-02-20 08:09:30	2015-02-20 08:24:48	2015-02-20 08:27:00		2015-02-20	43.2834	2015-02-20 07:26:12
1	6	2	x	x		2015-02-20 08:23:39	2015-02-20 08:31:27			2015-02-20	57.4334	2015-02-20 07:26:12
1	6	2	x	x		2015-02-20 08:30:22	2015-02-20 08:32:11			2015-02-20	64.1501	2015-02-20 07:26:12
1	6	2	x	x		2015-02-20 08:53:57	2015-02-20 08:56:38			2015-02-20	87.7334	2015-02-20 07:26:12
1	6	2	x	x		2015-02-20 08:54:27	2015-02-20 08:57:47			2015-02-20	88.2334	2015-02-20 07:26:12
1	6	2	x	x		2015-02-20 09:24:59	2015-02-20 09:25:02			2015-02-20	118.767	2015-02-20 07:26:12
1	6	2	x	x		2015-02-20 09:36:02	2015-02-20 09:36:16			2015-02-20	129.817	2015-02-20 07:26:12
1	6	2	x	x		2015-02-20 09:43:53	2015-02-20 09:44:03			2015-02-20	137.667	2015-02-20 07:26:12
1	6	2	x	x		2015-02-20 09:43:55	2015-02-20 09:44:19			2015-02-20	137.7	2015-02-20 07:26:12
1	6	2	x	x		2015-02-20 09:43:56	2015-02-20 09:44:52			2015-02-20	137.717	2015-02-20 07:26:12
1	6	2	x	x		2015-02-20 09:55:19	2015-02-20 09:55:20			2015-02-20	149.1	2015-02-20 07:26:12
1	6	2	x	x		2015-02-20 10:07:47	2015-02-20 10:07:53			2015-02-20	161.567	2015-02-20 07:26:12
1	6	2	x	x		2015-02-20 10:31:46	2015-02-20 10:31:48			2015-02-20	185.55	2015-02-20 07:26:12
1	6	2	x			2015-02-20 10:38:14				2015-02-20	192.017	2015-02-20 07:26:12
1	7	1	x	x		2015-02-23 07:25:08	2015-02-23 07:29:10			2015-02-23	0	2015-02-23 07:25:08
1	7	1	x	x		2015-02-23 07:25:09	2015-02-23 07:29:19			2015-02-23	0.0166667	2015-02-23 07:25:08
1	7	1	x	x	x	2015-02-23 07:25:10	2015-02-23 07:30:22	2015-02-23 07:32:58		2015-02-23	0.0333333	2015-02-23 07:25:08
1	7	1	x	x		2015-02-23 07:25:10	2015-02-23 07:31:30			2015-02-23	0.0333333	2015-02-23 07:25:08
1	7	1	x	x		2015-02-23 07:25:11	2015-02-23 07:32:16			2015-02-23	0.05	2015-02-23 07:25:08
1	7	1	x	x		2015-02-23 07:25:11	2015-02-23 07:33:15			2015-02-23	0.05	2015-02-23 07:25:08
1	7	1	x	x		2015-02-23 07:25:12	2015-02-23 07:33:36			2015-02-23	0.0666667	2015-02-23 07:25:08
1	7	1	x	x		2015-02-23 07:25:39	2015-02-23 07:34:17			2015-02-23	0.516667	2015-02-23 07:25:08
1	7	1	x	x		2015-02-23 07:25:42	2015-02-23 07:35:16			2015-02-23	0.566667	2015-02-23 07:25:08
1	7	1	x	x		2015-02-23 07:26:52	2015-02-23 07:36:16			2015-02-23	1.73333	2015-02-23 07:25:08
1	7	1	x	x		2015-02-23 07:28:04	2015-02-23 07:36:40			2015-02-23	2.93333	2015-02-23 07:25:08
1	7	1	x	x		2015-02-23 07:30:32	2015-02-23 07:37:27			2015-02-23	5.4	2015-02-23 07:25:08
1	7	1	x	x		2015-02-23 07:30:34	2015-02-23 07:38:17			2015-02-23	5.43333	2015-02-23 07:25:08
1	7	1	x	x		2015-02-23 07:34:58	2015-02-23 07:39:19			2015-02-23	9.83333	2015-02-23 07:25:08
1	7	1	x	x		2015-02-23 07:39:22	2015-02-23 07:39:28			2015-02-23	14.2333	2015-02-23 07:25:08
1	7	1	x	x		2015-02-23 07:40:48	2015-02-23 07:41:03			2015-02-23	15.6667	2015-02-23 07:25:08
1	7	1	x	x		2015-02-23 07:41:06	2015-02-23 07:41:19			2015-02-23	15.9667	2015-02-23 07:25:08
1	7	1	x	x		2015-02-23 07:43:56	2015-02-23 07:43:59			2015-02-23	18.8	2015-02-23 07:25:08
1	7	1	x	x		2015-02-23 07:45:24	2015-02-23 07:45:31			2015-02-23	20.2667	2015-02-23 07:25:08
1	7	1	x	x		2015-02-23 07:45:34	2015-02-23 07:46:36			2015-02-23	20.4333	2015-02-23 07:25:08
1	7	1	x	x		2015-02-23 07:46:46	2015-02-23 07:47:08			2015-02-23	21.6333	2015-02-23 07:25:08
1	7	1	x	x		2015-02-23 07:48:07	2015-02-23 07:48:12			2015-02-23	22.9833	2015-02-23 07:25:08
1	7	1	x	x		2015-02-23 07:48:41	2015-02-23 07:48:45			2015-02-23	23.55	2015-02-23 07:25:08
1	7	1	x	x		2015-02-23 07:51:20	2015-02-23 07:51:22			2015-02-23	26.2	2015-02-23 07:25:08
1	7	1	x	x		2015-02-23 07:52:27	2015-02-23 07:53:59			2015-02-23	27.3167	2015-02-23 07:25:08
1	7	1	x	x		2015-02-23 07:52:52	2015-02-23 07:53:25			2015-02-23	27.7333	2015-02-23 07:25:08
1	7	1	x	x		2015-02-23 07:53:17	2015-02-23 07:53:33			2015-02-23	28.15	2015-02-23 07:25:08
1	7	1	x	x		2015-02-23 07:57:39	2015-02-23 07:57:45			2015-02-23	32.5167	2015-02-23 07:25:08
1	7	1	x	x		2015-02-23 08:00:21	2015-02-23 08:00:32			2015-02-23	35.2167	2015-02-23 07:25:08
1	7	1	x	x		2015-02-23 08:00:37	2015-02-23 08:00:54			2015-02-23	35.4833	2015-02-23 07:25:08
1	7	1	x	x		2015-02-23 08:01:04	2015-02-23 08:01:08			2015-02-23	35.9333	2015-02-23 07:25:08
1	7	1	x	x		2015-02-23 08:06:23	2015-02-23 08:06:26			2015-02-23	41.25	2015-02-23 07:25:08
1	7	1	x	x		2015-02-23 08:07:12	2015-02-23 08:07:28			2015-02-23	42.0667	2015-02-23 07:25:08
1	7	1	x	x		2015-02-23 08:08:31	2015-02-23 08:08:41			2015-02-23	43.3833	2015-02-23 07:25:08
1	7	1	x	x		2015-02-23 08:08:47	2015-02-23 08:08:55			2015-02-23	43.65	2015-02-23 07:25:08
1	7	1	x	x		2015-02-23 08:09:43	2015-02-23 08:10:27			2015-02-23	44.5833	2015-02-23 07:25:08
1	7	1	x	x		2015-02-23 08:10:17	2015-02-23 08:10:46			2015-02-23	45.15	2015-02-23 07:25:08
1	7	1	x	x		2015-02-23 08:14:07	2015-02-23 08:16:09			2015-02-23	48.9833	2015-02-23 07:25:08
1	7	1	x	x		2015-02-23 08:15:49	2015-02-23 08:15:53			2015-02-23	50.6833	2015-02-23 07:25:08
1	7	1	x	x		2015-02-23 08:17:08	2015-02-23 08:17:25			2015-02-23	52	2015-02-23 07:25:08
1	7	1	x	x		2015-02-23 08:19:08	2015-02-23 08:19:13			2015-02-23	54	2015-02-23 07:25:08
1	7	1	x	x		2015-02-23 08:19:21	2015-02-23 08:19:25			2015-02-23	54.2167	2015-02-23 07:25:08
1	7	1	x	x		2015-02-23 08:20:31	2015-02-23 08:20:46			2015-02-23	55.3833	2015-02-23 07:25:08
1	7	1	x	x		2015-02-23 08:21:51	2015-02-23 08:21:57			2015-02-23	56.7167	2015-02-23 07:25:08
1	7	1	x	x		2015-02-23 08:21:58	2015-02-23 08:22:25			2015-02-23	56.8333	2015-02-23 07:25:08
1	7	1	x	x		2015-02-23 08:32:18	2015-02-23 08:32:40			2015-02-23	67.1667	2015-02-23 07:25:08
1	7	1	x	x		2015-02-23 08:32:31	2015-02-23 08:32:45			2015-02-23	67.3833	2015-02-23 07:25:08
1	7	1	x	x		2015-02-23 08:32:36	2015-02-23 08:32:48			2015-02-23	67.4667	2015-02-23 07:25:08
1	7	1	x	x		2015-02-23 08:32:52	2015-02-23 08:32:57			2015-02-23	67.7333	2015-02-23 07:25:08
1	7	1	x	x		2015-02-23 08:32:59	2015-02-23 08:33:11			2015-02-23	67.85	2015-02-23 07:25:08
1	7	1	x	x	x	2015-02-23 08:33:25	2015-02-23 08:33:37	2015-02-23 08:36:13		2015-02-23	68.2833	2015-02-23 07:25:08
1	7	1	x	x	x	2015-02-23 08:33:48	2015-02-23 08:33:51	2015-02-23 08:41:46		2015-02-23	68.6667	2015-02-23 07:25:08
1	7	1	x	x		2015-02-23 08:34:08	2015-02-23 08:34:23			2015-02-23	69	2015-02-23 07:25:08
1	7	1	x	x		2015-02-23 08:34:55	2015-02-23 08:35:30			2015-02-23	69.7833	2015-02-23 07:25:08
1	7	1	x			2015-02-23 08:40:12				2015-02-23	75.0667	2015-02-23 07:25:08
1	7	1	x			2015-02-23 08:40:37				2015-02-23	75.4833	2015-02-23 07:25:08
1	7	1	x			2015-02-23 08:44:11				2015-02-23	79.05	2015-02-23 07:25:08
1	7	1	x			2015-02-23 08:45:49				2015-02-23	80.6833	2015-02-23 07:25:08
1	7	1	x	x		2015-02-23 08:46:27	2015-02-23 08:46:30			2015-02-23	81.3167	2015-02-23 07:25:08
1	7	1	x	x		2015-02-23 08:48:12	2015-02-23 08:48:18			2015-02-23	83.0667	2015-02-23 07:25:08
1	7	1	x	x		2015-02-23 08:50:18	2015-02-23 08:50:46			2015-02-23	85.1667	2015-02-23 07:25:08
1	7	1	x	x		2015-02-23 08:51:23	2015-02-23 08:51:26			2015-02-23	86.25	2015-02-23 07:25:08
1	7	1	x	x		2015-02-23 08:54:07	2015-02-23 08:54:25			2015-02-23	88.9833	2015-02-23 07:25:08
1	7	1	x	x		2015-02-23 08:58:51	2015-02-23 08:59:00			2015-02-23	93.7167	2015-02-23 07:25:08
1	7	1	x	x		2015-02-23 08:59:43	2015-02-23 08:59:48			2015-02-23	94.5833	2015-02-23 07:25:08
1	7	1	x			2015-02-23 09:21:21				2015-02-23	116.217	2015-02-23 07:25:08
1	7	1	x			2015-02-23 09:21:23				2015-02-23	116.25	2015-02-23 07:25:08
1	7	1	x	x		2015-02-23 09:22:51	2015-02-23 09:23:01			2015-02-23	117.717	2015-02-23 07:25:08
1	7	1	x	x		2015-02-23 09:32:38	2015-02-23 09:32:41			2015-02-23	127.5	2015-02-23 07:25:08
1	7	1	x	x		2015-02-23 09:35:06	2015-02-23 09:35:14			2015-02-23	129.967	2015-02-23 07:25:08
1	7	1	x	x		2015-02-23 09:41:30	2015-02-23 09:41:54			2015-02-23	136.367	2015-02-23 07:25:08
1	7	1	x	x		2015-02-23 09:49:56	2015-02-23 09:49:57			2015-02-23	144.8	2015-02-23 07:25:08
1	7	1	x	x		2015-02-23 09:55:26	2015-02-23 09:55:27			2015-02-23	150.3	2015-02-23 07:25:08
1	7	1	x	x		2015-02-23 10:05:26	2015-02-23 10:05:34			2015-02-23	160.3	2015-02-23 07:25:08
1	7	1	x	x		2015-02-23 10:06:05	2015-02-23 10:06:07			2015-02-23	160.95	2015-02-23 07:25:08
1	7	1	x	x		2015-02-23 10:07:48	2015-02-23 10:07:51			2015-02-23	162.667	2015-02-23 07:25:08
1	7	1	x	x		2015-02-23 10:07:53	2015-02-23 10:07:56			2015-02-23	162.75	2015-02-23 07:25:08
1	7	1	x	x		2015-02-23 10:09:06	2015-02-23 10:09:22			2015-02-23	163.967	2015-02-23 07:25:08
1	7	1	x	x		2015-02-23 10:09:13	2015-02-23 10:09:37			2015-02-23	164.083	2015-02-23 07:25:08
1	7	1	x	x		2015-02-23 11:04:50	2015-02-23 11:04:51			2015-02-23	219.7	2015-02-23 07:25:08
1	7	1	x	x		2015-02-23 12:07:29	2015-02-23 12:08:11			2015-02-23	282.35	2015-02-23 07:25:08
1	7	1	x	x		2015-02-23 12:19:54	2015-02-23 12:20:05			2015-02-23	294.767	2015-02-23 07:25:08
1	7	1	x	x		2015-02-23 12:19:56	2015-02-23 12:20:32			2015-02-23	294.8	2015-02-23 07:25:08
1	7	1	x	x		2015-02-23 13:45:50	2015-02-23 13:46:03			2015-02-23	380.7	2015-02-23 07:25:08
1	7	1	x			2015-02-23 14:18:17				2015-02-23	413.15	2015-02-23 07:25:08
1	7	2	x	x		2015-02-24 07:26:36	2015-02-24 07:33:56			2015-02-24	0	2015-02-24 07:26:36
1	7	2	x	x		2015-02-24 07:26:44	2015-02-24 07:34:00			2015-02-24	0.133333	2015-02-24 07:26:36
1	7	2	x	x		2015-02-24 07:26:46	2015-02-24 07:34:03			2015-02-24	0.166667	2015-02-24 07:26:36
1	7	2	x	x		2015-02-24 07:26:48	2015-02-24 07:34:04			2015-02-24	0.2	2015-02-24 07:26:36
1	7	2	x	x		2015-02-24 07:26:49	2015-02-24 07:34:10			2015-02-24	0.216667	2015-02-24 07:26:36
1	7	2	x	x		2015-02-24 07:26:51	2015-02-24 07:34:11			2015-02-24	0.25	2015-02-24 07:26:36
1	7	2	x	x		2015-02-24 07:26:53	2015-02-24 07:34:13			2015-02-24	0.283333	2015-02-24 07:26:36
1	7	2	x	x		2015-02-24 07:26:54	2015-02-24 07:34:16			2015-02-24	0.3	2015-02-24 07:26:36
1	7	2	x	x		2015-02-24 07:26:56	2015-02-24 07:34:18			2015-02-24	0.333333	2015-02-24 07:26:36
1	7	2	x	x		2015-02-24 07:26:57	2015-02-24 07:34:20			2015-02-24	0.35	2015-02-24 07:26:36
1	7	2	x	x		2015-02-24 07:27:30	2015-02-24 07:34:21			2015-02-24	0.9	2015-02-24 07:26:36
1	7	2	x	x		2015-02-24 07:29:08	2015-02-24 07:34:23			2015-02-24	2.53333	2015-02-24 07:26:36
1	7	2	x	x		2015-02-24 07:33:53	2015-02-24 07:34:24			2015-02-24	7.28333	2015-02-24 07:26:36
1	7	2	x	x		2015-02-24 07:39:39	2015-02-24 07:41:53			2015-02-24	13.05	2015-02-24 07:26:36
1	7	2	x	x		2015-02-24 07:42:17	2015-02-24 07:42:21			2015-02-24	15.6833	2015-02-24 07:26:36
1	7	2	x	x		2015-02-24 07:42:19	2015-02-24 07:42:29			2015-02-24	15.7167	2015-02-24 07:26:36
1	7	2	x	x		2015-02-24 07:43:03	2015-02-24 07:43:07			2015-02-24	16.45	2015-02-24 07:26:36
1	7	2	x	x		2015-02-24 07:43:24	2015-02-24 07:43:35			2015-02-24	16.8	2015-02-24 07:26:36
1	7	2	x	x		2015-02-24 07:43:25	2015-02-24 07:43:36			2015-02-24	16.8167	2015-02-24 07:26:36
1	7	2	x	x		2015-02-24 07:43:44	2015-02-24 07:43:51			2015-02-24	17.1333	2015-02-24 07:26:36
1	7	2	x	x		2015-02-24 07:44:39	2015-02-24 07:44:53			2015-02-24	18.05	2015-02-24 07:26:36
1	7	2	x	x		2015-02-24 07:45:01	2015-02-24 07:45:05			2015-02-24	18.4167	2015-02-24 07:26:36
1	7	2	x	x		2015-02-24 07:46:16	2015-02-24 07:47:02			2015-02-24	19.6667	2015-02-24 07:26:36
1	7	2	x	x		2015-02-24 07:47:16	2015-02-24 07:47:31			2015-02-24	20.6667	2015-02-24 07:26:36
1	7	2	x	x		2015-02-24 07:48:14	2015-02-24 07:48:31			2015-02-24	21.6333	2015-02-24 07:26:36
1	7	2	x	x		2015-02-24 07:50:50	2015-02-24 07:50:51			2015-02-24	24.2333	2015-02-24 07:26:36
1	7	2	x	x		2015-02-24 07:51:50	2015-02-24 07:51:53			2015-02-24	25.2333	2015-02-24 07:26:36
1	7	2	x	x		2015-02-24 07:51:56	2015-02-24 07:52:35			2015-02-24	25.3333	2015-02-24 07:26:36
1	7	2	x	x		2015-02-24 07:52:36	2015-02-24 07:52:38			2015-02-24	26	2015-02-24 07:26:36
1	7	2	x	x		2015-02-24 07:57:17	2015-02-24 07:57:33			2015-02-24	30.6833	2015-02-24 07:26:36
1	7	2	x	x		2015-02-24 07:58:03	2015-02-24 07:58:05			2015-02-24	31.45	2015-02-24 07:26:36
1	7	2	x	x		2015-02-24 07:59:07	2015-02-24 07:59:15			2015-02-24	32.5167	2015-02-24 07:26:36
1	7	2	x	x		2015-02-24 08:00:47	2015-02-24 08:00:51			2015-02-24	34.1833	2015-02-24 07:26:36
1	7	2	x	x		2015-02-24 08:05:52	2015-02-24 08:05:55			2015-02-24	39.2667	2015-02-24 07:26:36
1	7	2	x	x		2015-02-24 08:06:01	2015-02-24 08:06:08			2015-02-24	39.4167	2015-02-24 07:26:36
1	7	2	x	x		2015-02-24 08:06:04	2015-02-24 08:06:20			2015-02-24	39.4667	2015-02-24 07:26:36
1	7	2	x	x		2015-02-24 08:06:22	2015-02-24 08:06:31			2015-02-24	39.7667	2015-02-24 07:26:36
1	7	2	x	x		2015-02-24 08:09:04	2015-02-24 08:09:07			2015-02-24	42.4667	2015-02-24 07:26:36
1	7	2	x	x		2015-02-24 08:09:44	2015-02-24 08:10:01			2015-02-24	43.1333	2015-02-24 07:26:36
1	7	2	x	x		2015-02-24 08:10:07	2015-02-24 08:10:28			2015-02-24	43.5167	2015-02-24 07:26:36
1	7	2	x	x		2015-02-24 08:11:07	2015-02-24 08:11:11			2015-02-24	44.5167	2015-02-24 07:26:36
1	7	2	x	x		2015-02-24 08:11:10	2015-02-24 08:11:13			2015-02-24	44.5667	2015-02-24 07:26:36
1	7	2	x	x		2015-02-24 08:13:55	2015-02-24 08:14:00			2015-02-24	47.3167	2015-02-24 07:26:36
1	7	2	x	x		2015-02-24 08:16:27	2015-02-24 08:16:39			2015-02-24	49.85	2015-02-24 07:26:36
1	7	2	x	x		2015-02-24 08:16:41	2015-02-24 08:16:44			2015-02-24	50.0833	2015-02-24 07:26:36
1	7	2	x	x		2015-02-24 08:17:01	2015-02-24 08:17:35			2015-02-24	50.4167	2015-02-24 07:26:36
1	7	2	x	x		2015-02-24 08:19:28	2015-02-24 08:19:32			2015-02-24	52.8667	2015-02-24 07:26:36
1	7	2	x	x		2015-02-24 08:35:35	2015-02-24 08:35:37			2015-02-24	68.9833	2015-02-24 07:26:36
1	7	2	x	x		2015-02-24 08:36:28	2015-02-24 08:36:48			2015-02-24	69.8667	2015-02-24 07:26:36
1	7	2	x	x		2015-02-24 08:44:34	2015-02-24 08:44:45			2015-02-24	77.9667	2015-02-24 07:26:36
1	7	2	x	x		2015-02-24 08:44:36	2015-02-24 08:44:48			2015-02-24	78	2015-02-24 07:26:36
1	7	2	x	x		2015-02-24 08:49:10	2015-02-24 08:49:12			2015-02-24	82.5667	2015-02-24 07:26:36
1	7	2	x	x		2015-02-24 08:51:59	2015-02-24 08:52:04			2015-02-24	85.3833	2015-02-24 07:26:36
1	7	2	x	x		2015-02-24 08:52:58	2015-02-24 08:53:05			2015-02-24	86.3667	2015-02-24 07:26:36
1	7	2	x	x		2015-02-24 08:53:03	2015-02-24 08:53:16			2015-02-24	86.45	2015-02-24 07:26:36
1	7	2	x	x		2015-02-24 08:54:31	2015-02-24 08:54:36			2015-02-24	87.9167	2015-02-24 07:26:36
1	7	2	x	x		2015-02-24 09:02:47	2015-02-24 09:02:52			2015-02-24	96.1833	2015-02-24 07:26:36
1	7	2	x	x		2015-02-24 09:04:50	2015-02-24 09:04:52			2015-02-24	98.2333	2015-02-24 07:26:36
1	7	2	x	x		2015-02-24 09:10:38	2015-02-24 09:10:40			2015-02-24	104.033	2015-02-24 07:26:36
1	7	2	x	x		2015-02-24 09:18:46	2015-02-24 09:18:47			2015-02-24	112.167	2015-02-24 07:26:36
1	7	2	x	x		2015-02-24 09:23:02	2015-02-24 09:23:08			2015-02-24	116.433	2015-02-24 07:26:36
1	7	2	x	x		2015-02-24 09:24:45	2015-02-24 09:24:50			2015-02-24	118.15	2015-02-24 07:26:36
1	7	2	x	x		2015-02-24 09:37:29	2015-02-24 09:37:36			2015-02-24	130.883	2015-02-24 07:26:36
1	7	2	x	x		2015-02-24 09:37:33	2015-02-24 09:39:04			2015-02-24	130.95	2015-02-24 07:26:36
1	7	2	x	x		2015-02-24 09:47:00	2015-02-24 09:47:02			2015-02-24	140.4	2015-02-24 07:26:36
1	7	2	x	x		2015-02-24 09:48:56	2015-02-24 09:49:00			2015-02-24	142.333	2015-02-24 07:26:36
1	7	2	x	x		2015-02-24 10:19:22	2015-02-24 10:19:35			2015-02-24	172.767	2015-02-24 07:26:36
1	7	2	x			2015-02-24 10:41:43				2015-02-24	195.117	2015-02-24 07:26:36
1	7	2	x			2015-02-24 11:00:32				2015-02-24	213.933	2015-02-24 07:26:36
1	7	2	x	x		2015-02-24 14:43:28	2015-02-24 14:43:29			2015-02-24	436.867	2015-02-24 07:26:36
1	8	1	x	x		2015-02-24 07:40:32	2015-02-24 07:41:41			2015-02-24	13.9333	2015-02-24 07:26:36
1	8	1	x	x		2015-02-24 07:40:33	2015-02-24 07:41:50			2015-02-24	13.95	2015-02-24 07:26:36
1	8	1	x	x		2015-02-24 07:40:35	2015-02-24 07:41:56			2015-02-24	13.9833	2015-02-24 07:26:36
1	8	1	x	x		2015-02-24 07:40:45	2015-02-24 07:42:03			2015-02-24	14.15	2015-02-24 07:26:36
1	8	1	x	x		2015-02-24 07:40:46	2015-02-24 07:42:08			2015-02-24	14.1667	2015-02-24 07:26:36
1	8	1	x	x		2015-02-24 07:40:47	2015-02-24 07:42:12			2015-02-24	14.1833	2015-02-24 07:26:36
1	8	1	x	x		2015-02-24 07:40:49	2015-02-24 07:42:21			2015-02-24	14.2167	2015-02-24 07:26:36
1	8	1	x	x		2015-02-24 07:40:50	2015-02-24 07:42:28			2015-02-24	14.2333	2015-02-24 07:26:36
1	8	1	x	x		2015-02-24 07:40:54	2015-02-24 07:42:34			2015-02-24	14.3	2015-02-24 07:26:36
1	8	1	x	x		2015-02-24 07:40:55	2015-02-24 07:42:38			2015-02-24	14.3167	2015-02-24 07:26:36
1	8	1	x	x		2015-02-24 07:40:56	2015-02-24 07:42:42			2015-02-24	14.3333	2015-02-24 07:26:36
1	8	1	x	x		2015-02-24 07:40:58	2015-02-24 07:42:51			2015-02-24	14.3667	2015-02-24 07:26:36
1	8	1	x	x		2015-02-24 07:41:00	2015-02-24 07:42:53			2015-02-24	14.4	2015-02-24 07:26:36
1	8	1	x	x		2015-02-24 07:41:04	2015-02-24 07:43:17			2015-02-24	14.4667	2015-02-24 07:26:36
1	8	1	x	x		2015-02-24 07:41:05	2015-02-24 07:43:26			2015-02-24	14.4833	2015-02-24 07:26:36
1	8	1	x	x		2015-02-24 07:41:06	2015-02-24 07:43:33			2015-02-24	14.5	2015-02-24 07:26:36
1	8	1	x	x		2015-02-24 07:41:08	2015-02-24 07:43:43			2015-02-24	14.5333	2015-02-24 07:26:36
1	8	1	x	x		2015-02-24 07:41:13	2015-02-24 07:43:16			2015-02-24	14.6167	2015-02-24 07:26:36
1	8	1	x	x		2015-02-24 07:41:18	2015-02-24 07:44:03			2015-02-24	14.7	2015-02-24 07:26:36
1	8	1	x	x		2015-02-24 07:41:19	2015-02-24 07:44:17			2015-02-24	14.7167	2015-02-24 07:26:36
1	8	1	x	x		2015-02-24 07:44:38	2015-02-24 07:44:40			2015-02-24	18.0333	2015-02-24 07:26:36
1	8	1	x	x		2015-02-24 07:48:04	2015-02-24 07:48:13			2015-02-24	21.4667	2015-02-24 07:26:36
1	8	1	x	x		2015-02-24 07:48:08	2015-02-24 07:48:18			2015-02-24	21.5333	2015-02-24 07:26:36
1	8	1	x	x		2015-02-24 07:48:23	2015-02-24 07:49:02			2015-02-24	21.7833	2015-02-24 07:26:36
1	8	1	x	x		2015-02-24 07:49:34	2015-02-24 07:49:36			2015-02-24	22.9667	2015-02-24 07:26:36
1	8	1	x	x		2015-02-24 07:51:27	2015-02-24 07:51:38			2015-02-24	24.85	2015-02-24 07:26:36
1	8	1	x	x		2015-02-24 07:51:39	2015-02-24 07:52:42			2015-02-24	25.05	2015-02-24 07:26:36
1	8	1	x	x		2015-02-24 07:52:04	2015-02-24 07:52:44			2015-02-24	25.4667	2015-02-24 07:26:36
1	8	1	x	x		2015-02-24 07:53:27	2015-02-24 07:53:32			2015-02-24	26.85	2015-02-24 07:26:36
1	8	1	x	x		2015-02-24 07:55:41	2015-02-24 07:55:43			2015-02-24	29.0833	2015-02-24 07:26:36
1	8	1	x	x		2015-02-24 07:57:16	2015-02-24 07:57:42			2015-02-24	30.6667	2015-02-24 07:26:36
1	8	1	x	x		2015-02-24 07:57:17	2015-02-24 07:57:44			2015-02-24	30.6833	2015-02-24 07:26:36
1	8	1	x	x		2015-02-24 08:00:02	2015-02-24 08:00:04			2015-02-24	33.4333	2015-02-24 07:26:36
1	8	1	x	x		2015-02-24 08:01:19	2015-02-24 08:01:20			2015-02-24	34.7167	2015-02-24 07:26:36
1	8	1	x	x		2015-02-24 08:07:10	2015-02-24 08:07:11			2015-02-24	40.5667	2015-02-24 07:26:36
1	8	1	x	x		2015-02-24 08:09:02	2015-02-24 08:09:04			2015-02-24	42.4333	2015-02-24 07:26:36
1	8	1	x	x		2015-02-24 08:10:47	2015-02-24 08:10:49			2015-02-24	44.1833	2015-02-24 07:26:36
1	8	1	x	x		2015-02-24 08:11:43	2015-02-24 08:11:44			2015-02-24	45.1167	2015-02-24 07:26:36
1	8	1	x	x		2015-02-24 08:11:56	2015-02-24 08:12:22			2015-02-24	45.3333	2015-02-24 07:26:36
1	8	1	x	x		2015-02-24 08:24:55	2015-02-24 08:24:57			2015-02-24	58.3167	2015-02-24 07:26:36
1	8	1	x	x		2015-02-24 08:35:27	2015-02-24 08:35:28			2015-02-24	68.85	2015-02-24 07:26:36
1	8	1	x	x		2015-02-24 08:49:59	2015-02-24 08:50:02			2015-02-24	83.3833	2015-02-24 07:26:36
1	8	1	x	x		2015-02-24 09:00:44	2015-02-24 09:00:46			2015-02-24	94.1333	2015-02-24 07:26:36
1	8	1	x	x	x	2015-02-24 09:24:30	2015-02-24 09:24:32	2015-02-24 09:33:22		2015-02-24	117.9	2015-02-24 07:26:36
1	8	1	x	x	x	2015-02-24 09:33:19	2015-02-24 09:33:21	2015-02-24 09:33:26		2015-02-24	126.717	2015-02-24 07:26:36
1	8	1	x	x		2015-02-24 11:06:34	2015-02-24 11:07:10			2015-02-24	219.967	2015-02-24 07:26:36
1	8	1	x	x		2015-02-24 12:24:47	2015-02-24 12:25:12			2015-02-24	298.183	2015-02-24 07:26:36
1	8	1	x	x		2015-02-24 13:17:25	2015-02-24 13:17:27			2015-02-24	350.817	2015-02-24 07:26:36
1	8	2	x	x		2015-02-25 07:33:08	2015-02-25 07:33:21			2015-02-25	0	2015-02-25 07:33:08
1	8	2	x	x		2015-02-25 07:33:08	2015-02-25 07:33:23			2015-02-25	0	2015-02-25 07:33:08
1	8	2	x	x		2015-02-25 07:33:15	2015-02-25 07:33:53			2015-02-25	0.11675	2015-02-25 07:33:07
1	8	2	x	x		2015-02-25 07:33:15	2015-02-25 07:34:36			2015-02-25	0.11675	2015-02-25 07:33:07
1	8	2	x	x		2015-02-25 07:33:16	2015-02-25 07:36:00			2015-02-25	0.133417	2015-02-25 07:33:07
1	8	2	x	x		2015-02-25 07:33:17	2015-02-25 07:36:08			2015-02-25	0.150083	2015-02-25 07:33:07
1	8	2	x	x		2015-02-25 07:33:17	2015-02-25 07:37:11			2015-02-25	0.150083	2015-02-25 07:33:07
1	8	2	x	x		2015-02-25 07:33:18	2015-02-25 07:37:14			2015-02-25	0.16675	2015-02-25 07:33:07
1	8	2	x	x		2015-02-25 07:33:19	2015-02-25 07:37:42			2015-02-25	0.183417	2015-02-25 07:33:07
1	8	2	x	x		2015-02-25 07:33:19	2015-02-25 07:38:14			2015-02-25	0.183417	2015-02-25 07:33:07
1	8	2	x	x		2015-02-25 07:33:30	2015-02-25 07:38:16			2015-02-25	0.36675	2015-02-25 07:33:07
1	8	2	x	x		2015-02-25 07:35:07	2015-02-25 07:38:44			2015-02-25	1.98342	2015-02-25 07:33:07
1	8	2	x	x		2015-02-25 07:37:49	2015-02-25 07:39:12			2015-02-25	4.68342	2015-02-25 07:33:07
1	8	2	x	x		2015-02-25 07:39:34	2015-02-25 07:39:41			2015-02-25	6.43342	2015-02-25 07:33:07
1	8	2	x	x		2015-02-25 07:43:21	2015-02-25 07:43:33			2015-02-25	10.2168	2015-02-25 07:33:07
1	8	2	x	x		2015-02-25 07:44:10	2015-02-25 07:45:06			2015-02-25	11.0334	2015-02-25 07:33:07
1	8	2	x	x		2015-02-25 07:45:18	2015-02-25 07:46:23			2015-02-25	12.1668	2015-02-25 07:33:07
1	8	2	x	x		2015-02-25 07:46:25	2015-02-25 07:46:36			2015-02-25	13.2834	2015-02-25 07:33:07
1	8	2	x	x	x	2015-02-25 07:48:41	2015-02-25 07:48:50	2015-02-25 07:50:19		2015-02-25	15.5501	2015-02-25 07:33:07
1	8	2	x	x		2015-02-25 07:49:10	2015-02-25 07:51:02			2015-02-25	16.0334	2015-02-25 07:33:07
1	8	2	x	x		2015-02-25 07:49:12	2015-02-25 07:51:07			2015-02-25	16.0668	2015-02-25 07:33:07
1	8	2	x	x		2015-02-25 07:50:21	2015-02-25 07:51:43			2015-02-25	17.2168	2015-02-25 07:33:07
1	8	2	x	x		2015-02-25 07:50:34	2015-02-25 07:53:19			2015-02-25	17.4334	2015-02-25 07:33:07
1	8	2	x	x		2015-02-25 07:50:46	2015-02-25 07:54:33			2015-02-25	17.6334	2015-02-25 07:33:07
1	8	2	x			2015-02-25 07:51:38				2015-02-25	18.5001	2015-02-25 07:33:07
1	8	2	x			2015-02-25 07:51:48				2015-02-25	18.6668	2015-02-25 07:33:07
1	8	2	x	x		2015-02-25 07:55:50	2015-02-25 07:56:09			2015-02-25	22.7001	2015-02-25 07:33:07
1	8	2	x	x		2015-02-25 08:01:44	2015-02-25 08:01:47			2015-02-25	28.6001	2015-02-25 07:33:07
1	8	2	x	x		2015-02-25 08:04:59	2015-02-25 08:05:24			2015-02-25	31.8501	2015-02-25 07:33:07
1	8	2	x	x		2015-02-25 08:07:12	2015-02-25 08:07:16			2015-02-25	34.0668	2015-02-25 07:33:07
1	8	2	x	x		2015-02-25 08:10:11	2015-02-25 08:10:18			2015-02-25	37.0501	2015-02-25 07:33:07
1	8	2	x	x		2015-02-25 08:12:53	2015-02-25 08:13:00			2015-02-25	39.7501	2015-02-25 07:33:07
1	8	2	x	x		2015-02-25 08:15:28	2015-02-25 08:15:33			2015-02-25	42.3334	2015-02-25 07:33:07
1	8	2	x	x		2015-02-25 08:16:37	2015-02-25 08:16:39			2015-02-25	43.4834	2015-02-25 07:33:07
1	8	2	x	x		2015-02-25 08:16:41	2015-02-25 08:16:44			2015-02-25	43.5501	2015-02-25 07:33:07
1	8	2	x	x		2015-02-25 08:26:16	2015-02-25 08:26:17			2015-02-25	53.1334	2015-02-25 07:33:07
1	8	2	x	x		2015-02-25 08:31:58	2015-02-25 08:32:03			2015-02-25	58.8334	2015-02-25 07:33:07
1	8	2	x	x		2015-02-25 08:37:13	2015-02-25 08:37:21			2015-02-25	64.0834	2015-02-25 07:33:07
1	8	2	x	x		2015-02-25 08:37:43	2015-02-25 08:38:01			2015-02-25	64.5834	2015-02-25 07:33:07
1	8	2	x	x		2015-02-25 08:40:59	2015-02-25 08:41:05			2015-02-25	67.8501	2015-02-25 07:33:07
1	8	2	x	x		2015-02-25 09:47:27	2015-02-25 09:47:30			2015-02-25	134.317	2015-02-25 07:33:07
1	9	1	x	x		2015-02-26 07:35:40	2015-02-26 07:42:04			2015-02-26	0	2015-02-26 07:35:40
1	9	1	x	x		2015-02-26 07:35:41	2015-02-26 07:42:24			2015-02-26	0.0166667	2015-02-26 07:35:40
1	9	1	x	x		2015-02-26 07:35:42	2015-02-26 07:43:01			2015-02-26	0.0333333	2015-02-26 07:35:40
1	9	1	x	x		2015-02-26 07:35:50	2015-02-26 07:43:29			2015-02-26	0.166667	2015-02-26 07:35:40
1	9	1	x	x		2015-02-26 07:35:51	2015-02-26 07:44:11			2015-02-26	0.183333	2015-02-26 07:35:40
1	9	1	x	x		2015-02-26 07:35:52	2015-02-26 07:44:24			2015-02-26	0.2	2015-02-26 07:35:40
1	9	1	x	x		2015-02-26 07:36:27	2015-02-26 07:44:48			2015-02-26	0.783333	2015-02-26 07:35:40
1	9	1	x	x		2015-02-26 07:39:09	2015-02-26 07:45:13			2015-02-26	3.48333	2015-02-26 07:35:40
1	9	1	x	x		2015-02-26 07:40:31	2015-02-26 07:45:13			2015-02-26	4.85	2015-02-26 07:35:40
1	9	1	x	x		2015-02-26 07:56:26	2015-02-26 07:56:58			2015-02-26	20.7667	2015-02-26 07:35:40
1	9	1	x	x		2015-02-26 07:56:28	2015-02-26 07:57:23			2015-02-26	20.8	2015-02-26 07:35:40
1	9	1	x	x		2015-02-26 07:56:29	2015-02-26 07:57:30			2015-02-26	20.8167	2015-02-26 07:35:40
1	9	1	x			2015-02-26 07:58:31				2015-02-26	22.85	2015-02-26 07:35:40
1	9	1	x			2015-02-26 07:58:31				2015-02-26	22.85	2015-02-26 07:35:40
1	9	1	x	x		2015-02-26 07:59:20	2015-02-26 08:03:50			2015-02-26	23.6667	2015-02-26 07:35:40
1	9	1	x	x		2015-02-26 08:11:21	2015-02-26 08:12:13			2015-02-26	35.6833	2015-02-26 07:35:40
1	9	1	x	x		2015-02-26 08:16:46	2015-02-26 08:19:57			2015-02-26	41.1	2015-02-26 07:35:40
1	9	1	x	x		2015-02-26 08:25:04	2015-02-26 08:28:32			2015-02-26	49.4	2015-02-26 07:35:40
1	9	1	x	x		2015-02-26 08:25:05	2015-02-26 08:28:35			2015-02-26	49.4167	2015-02-26 07:35:40
1	9	1	x			2015-02-26 08:36:23				2015-02-26	60.7167	2015-02-26 07:35:40
1	9	1	x	x		2015-02-26 08:45:19	2015-02-26 08:49:09			2015-02-26	69.65	2015-02-26 07:35:40
1	9	1	x	x		2015-02-26 08:45:54	2015-02-26 08:49:10			2015-02-26	70.2333	2015-02-26 07:35:40
1	9	1	x	x		2015-02-26 08:51:20	2015-02-26 08:51:43			2015-02-26	75.6667	2015-02-26 07:35:40
1	9	1	x	x		2015-02-26 08:56:52	2015-02-26 09:00:27			2015-02-26	81.2	2015-02-26 07:35:40
1	9	1	x	x	x	2015-02-26 09:09:22	2015-02-26 09:09:23	2015-02-26 09:09:53		2015-02-26	93.7	2015-02-26 07:35:40
1	9	1	x	x		2015-02-26 09:13:06	2015-02-26 09:13:08			2015-02-26	97.4333	2015-02-26 07:35:40
1	9	1	x	x		2015-02-26 09:31:54	2015-02-26 09:41:06			2015-02-26	116.233	2015-02-26 07:35:40
1	9	1	x			2015-02-26 09:51:40				2015-02-26	136	2015-02-26 07:35:40
1	9	1	x			2015-02-26 09:56:01				2015-02-26	140.35	2015-02-26 07:35:40
1	9	1	x	x		2015-02-26 10:01:47	2015-02-26 10:02:53			2015-02-26	146.117	2015-02-26 07:35:40
1	9	1	x	x		2015-02-26 11:07:32	2015-02-26 11:07:55			2015-02-26	211.867	2015-02-26 07:35:40
1	9	1	x	x		2015-02-26 11:40:47	2015-02-26 11:40:49			2015-02-26	245.117	2015-02-26 07:35:40
1	10	1	x	x	x	2015-03-03 07:32:09	2015-03-03 07:34:11	2015-03-03 07:34:45		2015-03-03	0	2015-03-03 07:32:09
1	10	1	x	x	x	2015-03-03 07:32:10	2015-03-03 07:34:12	2015-03-03 07:39:48		2015-03-03	0.0166667	2015-03-03 07:32:09
1	10	1	x	x		2015-03-03 07:38:27	2015-03-03 07:39:01			2015-03-03	6.30008	2015-03-03 07:32:08
1	10	1	x	x		2015-03-03 07:40:11	2015-03-03 07:42:50			2015-03-03	8.03342	2015-03-03 07:32:08
1	10	1	x	x		2015-03-03 07:43:26	2015-03-03 07:43:47			2015-03-03	11.2834	2015-03-03 07:32:08
1	10	1	x	x		2015-03-03 07:49:14	2015-03-03 07:49:28			2015-03-03	17.0834	2015-03-03 07:32:08
1	10	1	x	x		2015-03-03 07:57:14	2015-03-03 07:57:45			2015-03-03	25.0834	2015-03-03 07:32:08
1	10	1	x	x		2015-03-03 07:58:33	2015-03-03 07:58:49			2015-03-03	26.4001	2015-03-03 07:32:08
1	10	1	x			2015-03-03 08:02:46				2015-03-03	30.6168	2015-03-03 07:32:08
1	10	1	x	x		2015-03-03 08:08:01	2015-03-03 08:08:24			2015-03-03	35.8668	2015-03-03 07:32:08
1	10	1	x			2015-03-03 08:09:17				2015-03-03	37.1334	2015-03-03 07:32:08
1	10	1	x	x	x	2015-03-03 08:15:57	2015-03-03 08:16:24	2015-03-03 08:20:51		2015-03-03	43.8001	2015-03-03 07:32:08
1	10	1	x			2015-03-03 08:17:50				2015-03-03	45.6834	2015-03-03 07:32:08
1	10	1	x	x		2015-03-03 08:24:04	2015-03-03 08:24:26			2015-03-03	51.9168	2015-03-03 07:32:08
1	10	1	x	x	x	2015-03-03 08:27:42	2015-03-03 08:28:28	2015-03-03 08:31:40		2015-03-03	55.5501	2015-03-03 07:32:08
1	10	1	x	x		2015-03-03 08:28:52	2015-03-03 08:30:20			2015-03-03	56.7168	2015-03-03 07:32:08
1	10	1	x	x		2015-03-03 08:29:52	2015-03-03 08:30:36			2015-03-03	57.7168	2015-03-03 07:32:08
1	10	1	x	x		2015-03-03 08:29:53	2015-03-03 08:33:08			2015-03-03	57.7334	2015-03-03 07:32:08
1	10	1	x			2015-03-03 08:31:46				2015-03-03	59.6168	2015-03-03 07:32:08
1	10	1	x	x		2015-03-03 08:32:28	2015-03-03 08:43:19			2015-03-03	60.3168	2015-03-03 07:32:08
1	10	1	x			2015-03-03 08:37:13				2015-03-03	65.0668	2015-03-03 07:32:08
1	10	1	x	x		2015-03-03 08:38:12	2015-03-03 08:39:04			2015-03-03	66.0501	2015-03-03 07:32:08
1	10	1	x	x		2015-03-03 08:46:35	2015-03-03 08:46:39			2015-03-03	74.4334	2015-03-03 07:32:08
1	10	1	x	x		2015-03-03 08:47:34	2015-03-03 08:47:40			2015-03-03	75.4167	2015-03-03 07:32:08
1	10	1	x	x		2015-03-03 08:48:11	2015-03-03 08:49:36			2015-03-03	76.0334	2015-03-03 07:32:08
1	10	1	x	x		2015-03-03 08:48:25	2015-03-03 08:49:39			2015-03-03	76.2667	2015-03-03 07:32:08
1	10	1	x	x	x	2015-03-03 08:49:33	2015-03-03 08:49:40	2015-03-03 09:06:37		2015-03-03	77.4001	2015-03-03 07:32:08
1	10	1	x	x		2015-03-03 08:50:25	2015-03-03 08:53:46			2015-03-03	78.2668	2015-03-03 07:32:08
1	10	1	x	x		2015-03-03 08:51:25	2015-03-03 08:54:08			2015-03-03	79.2668	2015-03-03 07:32:08
1	10	1	x	x		2015-03-03 08:52:07	2015-03-03 08:54:16			2015-03-03	79.9668	2015-03-03 07:32:08
1	10	1	x	x		2015-03-03 09:02:43	2015-03-03 09:03:47			2015-03-03	90.5667	2015-03-03 07:32:08
1	10	1	x	x		2015-03-03 09:04:48	2015-03-03 09:04:56			2015-03-03	92.6501	2015-03-03 07:32:08
1	10	1	x	x		2015-03-03 09:09:47	2015-03-03 09:10:03			2015-03-03	97.6334	2015-03-03 07:32:08
1	10	1	x	x		2015-03-03 09:22:12	2015-03-03 09:22:22			2015-03-03	110.05	2015-03-03 07:32:08
1	10	1	x	x		2015-03-03 09:22:27	2015-03-03 09:22:34			2015-03-03	110.3	2015-03-03 07:32:08
1	10	1	x	x		2015-03-03 09:37:19	2015-03-03 09:37:20			2015-03-03	125.167	2015-03-03 07:32:08
1	10	1	x	x		2015-03-03 09:38:54	2015-03-03 09:40:43			2015-03-03	126.75	2015-03-03 07:32:08
1	10	1	x	x		2015-03-03 09:45:02	2015-03-03 09:47:33			2015-03-03	132.883	2015-03-03 07:32:08
1	10	1	x			2015-03-03 09:45:02				2015-03-03	132.883	2015-03-03 07:32:08
1	10	1	x	x		2015-03-03 09:59:31	2015-03-03 09:59:32			2015-03-03	147.367	2015-03-03 07:32:08
1	10	1	x			2015-03-03 10:28:05				2015-03-03	175.933	2015-03-03 07:32:08
1	10	1	x			2015-03-03 10:34:18				2015-03-03	182.15	2015-03-03 07:32:08
1	10	1	x			2015-03-03 10:36:48				2015-03-03	184.65	2015-03-03 07:32:08
1	10	1	x	x		2015-03-03 10:59:47	2015-03-03 10:59:56			2015-03-03	207.633	2015-03-03 07:32:08
1	10	1	x	x		2015-03-03 11:32:04	2015-03-03 11:35:22			2015-03-03	239.917	2015-03-03 07:32:08
1	10	1	x			2015-03-03 11:54:35				2015-03-03	262.433	2015-03-03 07:32:08
1	10	1	x			2015-03-03 11:55:14				2015-03-03	263.083	2015-03-03 07:32:08
1	10	1	x	x	x	2015-03-03 12:54:48	2015-03-03 12:55:13	2015-03-03 12:58:44		2015-03-03	322.65	2015-03-03 07:32:08
1	10	1	x	x		2015-03-03 13:09:37	2015-03-03 13:09:54			2015-03-03	337.467	2015-03-03 07:32:08
1	10	1	x	x		2015-03-03 13:09:43	2015-03-03 13:10:20			2015-03-03	337.567	2015-03-03 07:32:08
1	10	1	x			2015-03-03 13:19:07				2015-03-03	346.967	2015-03-03 07:32:08
1	10	2	x	x		2015-03-04 07:27:19	2015-03-04 07:48:47			2015-03-04	0	2015-03-04 07:27:19
1	10	2	x	x		2015-03-04 07:27:31	2015-03-04 07:49:14			2015-03-04	0.2	2015-03-04 07:27:19
1	10	2	x	x		2015-03-04 07:27:33	2015-03-04 07:53:31			2015-03-04	0.233333	2015-03-04 07:27:19
1	10	2	x	x		2015-03-04 07:49:00	2015-03-04 07:53:33			2015-03-04	21.6833	2015-03-04 07:27:19
1	10	2	x	x		2015-03-04 07:57:04	2015-03-04 08:02:28			2015-03-04	29.75	2015-03-04 07:27:19
1	10	2	x	x		2015-03-04 08:04:12	2015-03-04 08:04:51			2015-03-04	36.8833	2015-03-04 07:27:19
1	10	2	x	x		2015-03-04 08:10:03	2015-03-04 08:10:56			2015-03-04	42.7333	2015-03-04 07:27:19
1	10	2	x	x		2015-03-04 08:10:19	2015-03-04 08:11:12			2015-03-04	43	2015-03-04 07:27:19
1	10	2	x	x		2015-03-04 08:14:30	2015-03-04 08:14:32			2015-03-04	47.1833	2015-03-04 07:27:19
1	10	2	x	x		2015-03-04 08:26:27	2015-03-04 08:26:53			2015-03-04	59.1333	2015-03-04 07:27:19
1	10	2	x	x		2015-03-04 08:32:47	2015-03-04 08:33:06			2015-03-04	65.4667	2015-03-04 07:27:19
1	10	2	x	x		2015-03-04 08:32:55	2015-03-04 08:33:42			2015-03-04	65.6	2015-03-04 07:27:19
1	10	2	x	x		2015-03-04 08:34:23	2015-03-04 08:35:09			2015-03-04	67.0667	2015-03-04 07:27:19
1	10	2	x	x		2015-03-04 08:35:14	2015-03-04 08:38:43			2015-03-04	67.9167	2015-03-04 07:27:19
1	10	2	x	x		2015-03-04 08:42:56	2015-03-04 08:43:52			2015-03-04	75.6167	2015-03-04 07:27:19
1	10	2	x	x		2015-03-04 08:44:28	2015-03-04 08:45:29			2015-03-04	77.15	2015-03-04 07:27:19
1	10	2	x	x		2015-03-04 08:44:29	2015-03-04 08:45:32			2015-03-04	77.1667	2015-03-04 07:27:19
1	10	2	x	x		2015-03-04 08:44:58	2015-03-04 08:46:00			2015-03-04	77.65	2015-03-04 07:27:19
1	10	2	x	x		2015-03-04 08:46:29	2015-03-04 09:00:36			2015-03-04	79.1667	2015-03-04 07:27:19
1	10	2	x			2015-03-04 08:46:43				2015-03-04	79.4	2015-03-04 07:27:19
1	10	2	x			2015-03-04 08:48:01				2015-03-04	80.7	2015-03-04 07:27:19
1	10	2	x			2015-03-04 08:51:18				2015-03-04	83.9833	2015-03-04 07:27:19
1	10	2	x	x		2015-03-04 08:56:32	2015-03-04 08:56:34			2015-03-04	89.2167	2015-03-04 07:27:19
1	10	2	x	x		2015-03-04 09:20:42	2015-03-04 09:20:45			2015-03-04	113.383	2015-03-04 07:27:19
1	10	2	x	x		2015-03-04 09:22:43	2015-03-04 09:24:51			2015-03-04	115.4	2015-03-04 07:27:19
1	10	2	x	x		2015-03-04 09:31:09	2015-03-04 09:31:48			2015-03-04	123.833	2015-03-04 07:27:19
1	10	2	x	x		2015-03-04 09:49:32	2015-03-04 09:49:34			2015-03-04	142.217	2015-03-04 07:27:19
1	10	2	x	x		2015-03-04 09:55:22	2015-03-04 09:55:32			2015-03-04	148.05	2015-03-04 07:27:19
1	10	2	x			2015-03-04 10:07:17				2015-03-04	159.967	2015-03-04 07:27:19
1	10	2	x			2015-03-04 10:07:48				2015-03-04	160.483	2015-03-04 07:27:19
1	10	2	x			2015-03-04 10:14:56				2015-03-04	167.617	2015-03-04 07:27:19
1	10	2	x	x		2015-03-04 10:32:38	2015-03-04 10:33:11			2015-03-04	185.317	2015-03-04 07:27:19
1	10	2	x	x		2015-03-04 10:33:16	2015-03-04 10:33:49			2015-03-04	185.95	2015-03-04 07:27:19
1	10	2	x	x		2015-03-04 10:48:02	2015-03-04 10:48:57			2015-03-04	200.717	2015-03-04 07:27:19
1	10	2	x	x		2015-03-04 10:52:21	2015-03-04 10:53:26			2015-03-04	205.033	2015-03-04 07:27:19
1	10	2	x			2015-03-04 10:55:59				2015-03-04	208.667	2015-03-04 07:27:19
1	10	2	x			2015-03-04 10:57:20				2015-03-04	210.017	2015-03-04 07:27:19
1	10	2	x	x		2015-03-04 11:01:08	2015-03-04 11:02:24			2015-03-04	213.817	2015-03-04 07:27:19
1	10	2	x	x		2015-03-04 11:08:45	2015-03-04 11:08:47			2015-03-04	221.433	2015-03-04 07:27:19
1	10	2	x			2015-03-04 11:15:06				2015-03-04	227.783	2015-03-04 07:27:19
1	10	2	x	x		2015-03-04 11:35:50	2015-03-04 11:41:59			2015-03-04	248.517	2015-03-04 07:27:19
1	10	2	x	x		2015-03-04 12:21:14	2015-03-04 12:23:43			2015-03-04	293.917	2015-03-04 07:27:19
1	10	2	x	x		2015-03-04 12:48:48	2015-03-04 12:48:55			2015-03-04	321.483	2015-03-04 07:27:19
1	10	2	x			2015-03-04 12:50:27				2015-03-04	323.133	2015-03-04 07:27:19
1	10	2	x	x		2015-03-04 13:14:19	2015-03-04 13:14:21			2015-03-04	347	2015-03-04 07:27:19
1	10	2	x	x		2015-03-04 13:21:35	2015-03-04 13:22:04			2015-03-04	354.267	2015-03-04 07:27:19
1	10	2	x	x		2015-03-04 13:33:28	2015-03-04 13:33:38			2015-03-04	366.15	2015-03-04 07:27:19
1	10	2	x	x	x	2015-03-04 13:53:08	2015-03-04 13:53:09	2015-03-04 13:54:04		2015-03-04	385.817	2015-03-04 07:27:19
1	11	1	x	x		2015-03-05 07:33:00	2015-03-05 07:35:00			2015-03-05	0	2015-03-05 07:33:00
1	11	1	x	x		2015-03-05 07:33:00	2015-03-05 07:36:00			2015-03-05	0	2015-03-05 07:33:00
1	11	1	x	x		2015-03-05 07:33:00	2015-03-05 07:36:00			2015-03-05	8.33371e-05	2015-03-05 07:32:59
1	11	1	x	x		2015-03-05 07:33:00	2015-03-05 07:41:00			2015-03-05	8.33371e-05	2015-03-05 07:32:59
1	11	1	x	x		2015-03-05 07:33:00	2015-03-05 07:41:00			2015-03-05	8.33371e-05	2015-03-05 07:32:59
1	11	1	x	x		2015-03-05 07:33:00	2015-03-05 07:42:00			2015-03-05	8.33371e-05	2015-03-05 07:32:59
1	11	1	x	x		2015-03-05 07:34:00	2015-03-05 07:42:00			2015-03-05	1.00008	2015-03-05 07:32:59
1	11	1	x	x		2015-03-05 07:34:00	2015-03-05 07:43:00			2015-03-05	1.00008	2015-03-05 07:32:59
1	11	1	x	x		2015-03-05 07:34:00	2015-03-05 07:43:00			2015-03-05	1.00008	2015-03-05 07:32:59
1	11	1	x	x		2015-03-05 07:34:00	2015-03-05 07:43:00			2015-03-05	1.00008	2015-03-05 07:32:59
1	11	1	x	x		2015-03-05 07:34:00	2015-03-05 07:44:00			2015-03-05	1.00008	2015-03-05 07:32:59
1	11	1	x	x		2015-03-05 07:34:00	2015-03-05 07:45:00			2015-03-05	1.00008	2015-03-05 07:32:59
1	11	1	x	x		2015-03-05 07:37:00	2015-03-05 07:47:00			2015-03-05	4.00008	2015-03-05 07:32:59
1	11	1	x	x		2015-03-05 07:40:00	2015-03-05 07:47:00			2015-03-05	7.00008	2015-03-05 07:32:59
1	11	1	x	x		2015-03-05 07:43:00	2015-03-05 07:47:00			2015-03-05	10.0001	2015-03-05 07:32:59
1	11	1	x	x		2015-03-05 07:44:00	2015-03-05 07:48:00			2015-03-05	11.0001	2015-03-05 07:32:59
1	11	1	x	x		2015-03-05 07:46:00	2015-03-05 07:48:00			2015-03-05	13.0001	2015-03-05 07:32:59
1	11	1	x	x		2015-03-05 07:47:00	2015-03-05 07:48:00			2015-03-05	14.0001	2015-03-05 07:32:59
1	11	1	x	x		2015-03-05 07:47:00	2015-03-05 07:49:00			2015-03-05	14.0001	2015-03-05 07:32:59
1	11	1	x	x		2015-03-05 07:48:00	2015-03-05 07:49:00			2015-03-05	15.0001	2015-03-05 07:32:59
1	11	1	x	x		2015-03-05 07:48:00	2015-03-05 07:49:00			2015-03-05	15.0001	2015-03-05 07:32:59
1	11	1	x	x		2015-03-05 07:49:00	2015-03-05 07:51:00			2015-03-05	16.0001	2015-03-05 07:32:59
1	11	1	x	x		2015-03-05 07:50:00	2015-03-05 07:51:00			2015-03-05	17.0001	2015-03-05 07:32:59
1	11	1	x	x		2015-03-05 07:51:00	2015-03-05 07:51:00			2015-03-05	18.0001	2015-03-05 07:32:59
1	11	1	x			2015-03-05 07:54:00				2015-03-05	21.0001	2015-03-05 07:32:59
1	11	1	x			2015-03-05 07:54:00				2015-03-05	21.0001	2015-03-05 07:32:59
1	11	1	x	x	x	2015-03-05 08:00:00	2015-03-05 08:00:00	2015-03-05 08:10:00		2015-03-05	27.0001	2015-03-05 07:32:59
1	11	1	x	x		2015-03-05 08:14:00	2015-03-05 08:14:00			2015-03-05	41.0001	2015-03-05 07:32:59
1	11	1	x			2015-03-05 08:14:00				2015-03-05	41.0001	2015-03-05 07:32:59
1	11	1	x	x		2015-03-05 08:16:00	2015-03-05 08:38:00			2015-03-05	43.0001	2015-03-05 07:32:59
1	11	1	x	x		2015-03-05 08:31:00	2015-03-05 08:38:00			2015-03-05	58.0001	2015-03-05 07:32:59
1	11	1	x	x		2015-03-05 09:07:00	2015-03-05 09:11:00			2015-03-05	94.0001	2015-03-05 07:32:59
1	11	1	x	x		2015-03-05 09:27:00	2015-03-05 09:27:00			2015-03-05	114	2015-03-05 07:32:59
1	11	1	x	x		2015-03-05 11:05:00	2015-03-05 11:24:00			2015-03-05	212	2015-03-05 07:32:59
1	11	1	x	x		2015-03-05 11:25:00	2015-03-05 11:26:00			2015-03-05	232	2015-03-05 07:32:59
1	11	1	x	x		2015-03-05 12:00:00	2015-03-05 12:01:00			2015-03-05	267	2015-03-05 07:32:59
1	11	1	x	x		2015-03-05 12:13:00	2015-03-05 12:14:00			2015-03-05	280	2015-03-05 07:32:59
1	11	1	x	x		2015-03-05 12:13:00	2015-03-05 12:14:00			2015-03-05	280	2015-03-05 07:32:59
1	11	1	x	x		2015-03-05 13:08:00	2015-03-05 13:09:00			2015-03-05	335	2015-03-05 07:32:59
1	11	1	x	x		2015-03-05 13:56:00	2015-03-05 13:58:00			2015-03-05	383	2015-03-05 07:32:59
1	11	1	x	x		2015-03-05 13:56:00	2015-03-05 13:58:00			2015-03-05	383	2015-03-05 07:32:59
1	11	1	x	x		2015-03-05 13:56:00	2015-03-05 13:58:00			2015-03-05	383	2015-03-05 07:32:59
1	11	1	x	x		2015-03-05 14:15:00	2015-03-05 14:20:00			2015-03-05	402	2015-03-05 07:32:59
1	11	2	x	x		2015-03-06 07:32:52	2015-03-06 07:38:54			2015-03-06	0	2015-03-06 07:32:52
1	11	2	x	x		2015-03-06 07:33:06	2015-03-06 07:39:19			2015-03-06	0.233333	2015-03-06 07:32:52
1	11	2	x	x		2015-03-06 07:33:07	2015-03-06 07:39:44			2015-03-06	0.250083	2015-03-06 07:32:51
1	11	2	x	x		2015-03-06 07:33:08	2015-03-06 07:40:20			2015-03-06	0.26675	2015-03-06 07:32:51
1	11	2	x	x		2015-03-06 07:33:11	2015-03-06 07:40:31			2015-03-06	0.31675	2015-03-06 07:32:51
1	11	2	x	x		2015-03-06 07:33:14	2015-03-06 07:42:47			2015-03-06	0.36675	2015-03-06 07:32:51
1	11	2	x	x		2015-03-06 07:33:20	2015-03-06 07:43:38			2015-03-06	0.46675	2015-03-06 07:32:51
1	11	2	x	x		2015-03-06 07:33:21	2015-03-06 07:44:09			2015-03-06	0.483417	2015-03-06 07:32:51
1	11	2	x	x		2015-03-06 07:33:23	2015-03-06 07:44:43			2015-03-06	0.51675	2015-03-06 07:32:51
1	11	2	x	x		2015-03-06 07:33:27	2015-03-06 07:46:34			2015-03-06	0.583417	2015-03-06 07:32:51
1	11	2	x	x		2015-03-06 07:33:28	2015-03-06 07:49:32			2015-03-06	0.600083	2015-03-06 07:32:51
1	11	2	x	x		2015-03-06 07:33:34	2015-03-06 07:49:35			2015-03-06	0.700083	2015-03-06 07:32:51
1	11	2	x	x		2015-03-06 07:33:40	2015-03-06 07:49:49			2015-03-06	0.800083	2015-03-06 07:32:51
1	11	2	x	x		2015-03-06 07:33:42	2015-03-06 07:51:55			2015-03-06	0.833417	2015-03-06 07:32:51
1	11	2	x	x		2015-03-06 07:33:47	2015-03-06 07:52:10			2015-03-06	0.91675	2015-03-06 07:32:51
1	11	2	x	x		2015-03-06 07:33:52	2015-03-06 07:53:09			2015-03-06	1.00008	2015-03-06 07:32:51
1	11	2	x	x		2015-03-06 07:33:55	2015-03-06 07:53:27			2015-03-06	1.05008	2015-03-06 07:32:51
1	11	2	x	x		2015-03-06 07:36:02	2015-03-06 07:53:28			2015-03-06	3.16675	2015-03-06 07:32:51
1	11	2	x	x	x	2015-03-06 07:39:29	2015-03-06 07:54:04	2015-03-06 08:02:36	2015-03-06 10:10:00	2015-03-06	6.61675	2015-03-06 07:32:51
1	11	2	x	x		2015-03-06 07:42:43	2015-03-06 07:54:36			2015-03-06	9.85008	2015-03-06 07:32:51
1	11	2	x	x		2015-03-06 07:44:25	2015-03-06 07:55:10			2015-03-06	11.5501	2015-03-06 07:32:51
1	11	2	x	x		2015-03-06 07:45:17	2015-03-06 07:55:56			2015-03-06	12.4168	2015-03-06 07:32:51
1	11	2	x	x		2015-03-06 07:47:26	2015-03-06 07:56:30			2015-03-06	14.5668	2015-03-06 07:32:51
1	11	2	x	x		2015-03-06 07:50:40	2015-03-06 07:56:35			2015-03-06	17.8001	2015-03-06 07:32:51
1	11	2	x	x		2015-03-06 07:54:51	2015-03-06 07:58:04			2015-03-06	21.9834	2015-03-06 07:32:51
1	11	2	x	x		2015-03-06 07:56:39	2015-03-06 07:58:13			2015-03-06	23.7834	2015-03-06 07:32:51
1	11	2	x	x		2015-03-06 08:13:27	2015-03-06 08:13:28			2015-03-06	40.5834	2015-03-06 07:32:51
1	11	2	x	x		2015-03-06 08:33:14	2015-03-06 08:35:00			2015-03-06	60.3668	2015-03-06 07:32:51
1	11	2	x	x		2015-03-06 08:39:37	2015-03-06 08:41:59			2015-03-06	66.7501	2015-03-06 07:32:51
1	11	2	x			2015-03-06 08:49:17				2015-03-06	76.4168	2015-03-06 07:32:51
1	11	2	x			2015-03-06 08:54:47				2015-03-06	81.9168	2015-03-06 07:32:51
1	11	2	x	x		2015-03-06 08:59:04	2015-03-06 08:59:25			2015-03-06	86.2001	2015-03-06 07:32:51
1	11	2	x	x		2015-03-06 09:00:55	2015-03-06 09:01:12			2015-03-06	88.0501	2015-03-06 07:32:51
1	11	2	x			2015-03-06 09:17:30				2015-03-06	104.633	2015-03-06 07:32:51
1	11	2	x	x		2015-03-06 10:25:30	2015-03-06 10:55:34			2015-03-06	172.633	2015-03-06 07:32:51
1	11	2	x			2015-03-06 10:58:26				2015-03-06	205.567	2015-03-06 07:32:51
1	11	2	x			2015-03-06 11:35:39				2015-03-06	242.783	2015-03-06 07:32:51
1	11	2	x			2015-03-06 11:37:53				2015-03-06	245.017	2015-03-06 07:32:51
1	11	2	x			2015-03-06 11:41:35				2015-03-06	248.717	2015-03-06 07:32:51
1	11	2	x			2015-03-06 11:41:41				2015-03-06	248.817	2015-03-06 07:32:51
1	11	2	x			2015-03-06 12:09:00				2015-03-06	276.133	2015-03-06 07:32:51
1	11	2	x	x		2015-03-06 12:50:59	2015-03-06 12:56:16			2015-03-06	318.117	2015-03-06 07:32:51
1	11	2	x	x		2015-03-06 13:11:26	2015-03-06 13:16:20			2015-03-06	338.567	2015-03-06 07:32:51
1	11	2	x	x		2015-03-06 13:39:15	2015-03-06 13:40:09			2015-03-06	366.383	2015-03-06 07:32:51
1	11	2	x	x		2015-03-06 14:06:33	2015-03-06 14:07:40			2015-03-06	393.683	2015-03-06 07:32:51
1	11	2	x	x		2015-03-06 14:06:35	2015-03-06 14:07:42			2015-03-06	393.717	2015-03-06 07:32:51
1	11	2	x	x		2015-03-06 14:06:36	2015-03-06 14:07:44			2015-03-06	393.733	2015-03-06 07:32:51
1	11	2	x	x		2015-03-06 14:22:08	2015-03-06 14:32:10			2015-03-06	409.267	2015-03-06 07:32:51
1	11	2	x			2015-03-06 14:22:23	2015-03-06 14:49:00			2015-03-06	409.517	2015-03-06 07:32:51
1	11	2	x			2015-03-06 14:35:28				2015-03-06	422.6	2015-03-06 07:32:51
1	12	1	x	x		2015-03-09 07:23:49	2015-03-09 07:46:52			2015-03-09	0	2015-03-09 07:23:49
1	12	1	x	x		2015-03-09 07:24:16	2015-03-09 07:46:47			2015-03-09	0.45	2015-03-09 07:23:49
1	12	1	x			2015-03-09 07:24:19	2015-03-09 07:37:00			2015-03-09	0.5	2015-03-09 07:23:49
1	12	1	x			2015-03-09 07:24:34	2015-03-09 07:37:00			2015-03-09	0.75	2015-03-09 07:23:49
1	12	1	x			2015-03-09 07:24:37	2015-03-09 07:37:00			2015-03-09	0.8	2015-03-09 07:23:49
1	12	1	x			2015-03-09 07:24:43	2015-03-09 07:37:00			2015-03-09	0.9	2015-03-09 07:23:49
1	12	1	x			2015-03-09 07:24:48	2015-03-09 07:37:00			2015-03-09	0.983333	2015-03-09 07:23:49
1	12	1	x			2015-03-09 07:24:53	2015-03-09 07:37:00			2015-03-09	1.06667	2015-03-09 07:23:49
1	12	1	x			2015-03-09 07:25:01	2015-03-09 07:37:00			2015-03-09	1.2	2015-03-09 07:23:49
1	12	1	x	x		2015-03-09 07:25:04	2015-03-09 07:37:00			2015-03-09	1.25	2015-03-09 07:23:49
1	12	1	x			2015-03-09 07:25:09	2015-03-09 07:37:00			2015-03-09	1.33333	2015-03-09 07:23:49
1	12	1	x			2015-03-09 07:25:13	2015-03-09 07:37:00			2015-03-09	1.4	2015-03-09 07:23:49
1	12	1	x			2015-03-09 07:25:15	2015-03-09 07:37:00			2015-03-09	1.43333	2015-03-09 07:23:49
1	12	1	x			2015-03-09 07:25:23	2015-03-09 07:37:00			2015-03-09	1.56667	2015-03-09 07:23:49
1	12	1	x			2015-03-09 07:25:27	2015-03-09 07:37:00			2015-03-09	1.63333	2015-03-09 07:23:49
1	12	1	x			2015-03-09 07:25:35	2015-03-09 07:37:00			2015-03-09	1.76667	2015-03-09 07:23:49
1	12	1	x			2015-03-09 07:25:57	2015-03-09 07:37:00			2015-03-09	2.13333	2015-03-09 07:23:49
1	12	1	x			2015-03-09 07:26:10	2015-03-09 07:37:00			2015-03-09	2.35	2015-03-09 07:23:49
1	12	1	x			2015-03-09 07:26:11	2015-03-09 07:37:00			2015-03-09	2.36667	2015-03-09 07:23:49
1	12	1	x			2015-03-09 07:26:17	2015-03-09 07:37:00			2015-03-09	2.46667	2015-03-09 07:23:49
1	12	1	x	x		2015-03-09 07:26:22	2015-03-09 07:51:18			2015-03-09	2.55	2015-03-09 07:23:49
1	12	1	x	x		2015-03-09 07:26:24	2015-03-09 07:51:22			2015-03-09	2.58333	2015-03-09 07:23:49
1	12	1	x	x		2015-03-09 07:26:33	2015-03-09 07:51:41			2015-03-09	2.73333	2015-03-09 07:23:49
1	12	1	x	x		2015-03-09 07:26:50	2015-03-09 07:54:46			2015-03-09	3.01667	2015-03-09 07:23:49
1	12	1	x	x		2015-03-09 07:27:10	2015-03-09 07:54:48			2015-03-09	3.35	2015-03-09 07:23:49
1	12	1	x	x		2015-03-09 07:27:18	2015-03-09 07:54:54			2015-03-09	3.48333	2015-03-09 07:23:49
1	12	1	x	x		2015-03-09 07:30:04	2015-03-09 07:55:09			2015-03-09	6.25	2015-03-09 07:23:49
1	12	1	x	x		2015-03-09 07:32:15	2015-03-09 07:55:42			2015-03-09	8.43333	2015-03-09 07:23:49
1	12	1	x	x		2015-03-09 07:33:04	2015-03-09 07:55:51			2015-03-09	9.25	2015-03-09 07:23:49
1	12	1	x	x		2015-03-09 07:33:10	2015-03-09 07:56:05			2015-03-09	9.35	2015-03-09 07:23:49
1	12	1	x	x		2015-03-09 07:36:58	2015-03-09 07:56:40			2015-03-09	13.15	2015-03-09 07:23:49
1	12	1	x	x		2015-03-09 07:40:28	2015-03-09 07:59:57			2015-03-09	16.65	2015-03-09 07:23:49
1	12	1	x			2015-03-09 07:42:24	2015-03-09 08:00:04			2015-03-09	18.5833	2015-03-09 07:23:49
1	12	1	x			2015-03-09 07:42:41				2015-03-09	18.8667	2015-03-09 07:23:49
1	12	1	x			2015-03-09 07:43:16				2015-03-09	19.45	2015-03-09 07:23:49
1	12	1	x			2015-03-09 07:43:25				2015-03-09	19.6	2015-03-09 07:23:49
1	12	1	x			2015-03-09 07:52:49				2015-03-09	29	2015-03-09 07:23:49
1	12	1	x			2015-03-09 07:54:42				2015-03-09	30.8833	2015-03-09 07:23:49
1	12	1	x			2015-03-09 07:56:00				2015-03-09	32.1833	2015-03-09 07:23:49
1	12	1	x			2015-03-09 07:56:54				2015-03-09	33.0833	2015-03-09 07:23:49
1	12	1	x			2015-03-09 07:56:57				2015-03-09	33.1333	2015-03-09 07:23:49
1	12	1	x			2015-03-09 07:57:16				2015-03-09	33.45	2015-03-09 07:23:49
1	12	1	x			2015-03-09 08:00:00				2015-03-09	36.1833	2015-03-09 07:23:49
1	12	1	x			2015-03-09 08:02:17				2015-03-09	38.4667	2015-03-09 07:23:49
1	12	1	x			2015-03-09 08:02:24				2015-03-09	38.5833	2015-03-09 07:23:49
1	12	1	x			2015-03-09 08:02:39				2015-03-09	38.8333	2015-03-09 07:23:49
1	12	1	x	x		2015-03-09 08:02:41	2015-03-09 08:06:20			2015-03-09	38.8667	2015-03-09 07:23:49
1	12	1	x	x		2015-03-09 08:06:06	2015-03-09 08:06:33			2015-03-09	42.2833	2015-03-09 07:23:49
1	12	1	x			2015-03-09 08:06:09				2015-03-09	42.3333	2015-03-09 07:23:49
1	12	1	x			2015-03-09 08:06:17				2015-03-09	42.4667	2015-03-09 07:23:49
1	12	1	x			2015-03-09 08:06:41				2015-03-09	42.8667	2015-03-09 07:23:49
1	12	1	x			2015-03-09 08:07:49				2015-03-09	44	2015-03-09 07:23:49
1	12	1	x	x		2015-03-09 08:11:23	2015-03-09 08:11:40			2015-03-09	47.5667	2015-03-09 07:23:49
1	12	1	x			2015-03-09 08:11:59				2015-03-09	48.1667	2015-03-09 07:23:49
1	12	1	x			2015-03-09 08:12:01				2015-03-09	48.2	2015-03-09 07:23:49
1	12	1	x	x		2015-03-09 08:12:30	2015-03-09 08:13:14			2015-03-09	48.6833	2015-03-09 07:23:49
1	12	1	x	x		2015-03-09 08:12:31	2015-03-09 08:18:53			2015-03-09	48.7	2015-03-09 07:23:49
1	12	1	x	x		2015-03-09 08:13:31	2015-03-09 08:19:53			2015-03-09	49.7	2015-03-09 07:23:49
1	12	1	x	x	x	2015-03-09 08:13:51	2015-03-09 08:20:59	2015-03-09 08:31:23		2015-03-09	50.0333	2015-03-09 07:23:49
1	12	1	x			2015-03-09 08:16:29				2015-03-09	52.6667	2015-03-09 07:23:49
1	12	1	x			2015-03-09 08:18:57				2015-03-09	55.1333	2015-03-09 07:23:49
1	12	1	x	x		2015-03-09 08:19:40	2015-03-09 08:20:09			2015-03-09	55.85	2015-03-09 07:23:49
1	12	1	x	x		2015-03-09 08:19:47	2015-03-09 08:36:33			2015-03-09	55.9667	2015-03-09 07:23:49
1	12	1	x	x		2015-03-09 08:21:56	2015-03-09 08:23:31			2015-03-09	58.1167	2015-03-09 07:23:49
1	12	1	x	x		2015-03-09 08:21:58	2015-03-09 08:24:06			2015-03-09	58.15	2015-03-09 07:23:49
1	12	1	x	x		2015-03-09 08:24:40	2015-03-09 08:38:26			2015-03-09	60.85	2015-03-09 07:23:49
1	12	1	x			2015-03-09 08:28:10				2015-03-09	64.35	2015-03-09 07:23:49
1	12	1	x			2015-03-09 08:29:22				2015-03-09	65.55	2015-03-09 07:23:49
1	12	1	x			2015-03-09 08:29:39				2015-03-09	65.8333	2015-03-09 07:23:49
1	12	1	x			2015-03-09 08:33:35				2015-03-09	69.7667	2015-03-09 07:23:49
1	12	1	x			2015-03-09 08:35:09				2015-03-09	71.3333	2015-03-09 07:23:49
1	12	1	x	x		2015-03-09 08:40:38	2015-03-09 08:40:47			2015-03-09	76.8167	2015-03-09 07:23:49
1	12	1	x	x		2015-03-09 08:42:33	2015-03-09 08:42:40			2015-03-09	78.7333	2015-03-09 07:23:49
1	12	1	x	x		2015-03-09 08:45:02	2015-03-09 08:45:07			2015-03-09	81.2167	2015-03-09 07:23:49
1	12	1	x			2015-03-09 08:45:55				2015-03-09	82.1	2015-03-09 07:23:49
1	12	1	x	x	x	2015-03-09 08:50:05	2015-03-09 08:50:07	2015-03-09 09:27:04		2015-03-09	86.2667	2015-03-09 07:23:49
1	12	1	x	x		2015-03-09 08:51:07	2015-03-09 08:51:08			2015-03-09	87.3	2015-03-09 07:23:49
1	12	1	x	x		2015-03-09 09:00:20	2015-03-09 09:00:52			2015-03-09	96.5167	2015-03-09 07:23:49
1	12	1	x	x		2015-03-09 09:17:44	2015-03-09 09:17:45			2015-03-09	113.917	2015-03-09 07:23:49
1	12	1	x	x		2015-03-09 09:26:17	2015-03-09 09:26:19			2015-03-09	122.467	2015-03-09 07:23:49
1	12	1	x	x		2015-03-09 09:33:17	2015-03-09 09:33:19			2015-03-09	129.467	2015-03-09 07:23:49
1	12	1	x	x		2015-03-09 09:54:29	2015-03-09 09:54:31			2015-03-09	150.667	2015-03-09 07:23:49
1	12	1	x	x		2015-03-09 10:05:04	2015-03-09 10:05:59			2015-03-09	161.25	2015-03-09 07:23:49
1	12	1	x	x		2015-03-09 10:05:21	2015-03-09 10:07:14			2015-03-09	161.533	2015-03-09 07:23:49
1	12	1	x	x		2015-03-09 10:05:23	2015-03-09 10:07:43			2015-03-09	161.567	2015-03-09 07:23:49
1	12	1	x	x		2015-03-09 10:05:33	2015-03-09 10:11:31			2015-03-09	161.733	2015-03-09 07:23:49
1	12	1	x	x		2015-03-09 10:07:45	2015-03-09 10:11:38			2015-03-09	163.933	2015-03-09 07:23:49
1	12	1	x	x		2015-03-09 10:07:53	2015-03-09 10:11:44			2015-03-09	164.067	2015-03-09 07:23:49
1	12	1	x	x		2015-03-09 10:08:02	2015-03-09 10:12:03			2015-03-09	164.217	2015-03-09 07:23:49
1	12	1	x	x		2015-03-09 11:34:07	2015-03-09 11:34:10			2015-03-09	250.3	2015-03-09 07:23:49
1	12	1	x	x		2015-03-09 11:34:08	2015-03-09 11:34:11			2015-03-09	250.317	2015-03-09 07:23:49
1	12	1	x	x		2015-03-09 11:34:31	2015-03-09 11:34:33			2015-03-09	250.7	2015-03-09 07:23:49
1	12	1	x	x	x	2015-03-09 11:35:43	2015-03-09 11:35:44	2015-03-09 11:37:56		2015-03-09	251.9	2015-03-09 07:23:49
1	12	1	x	x		2015-03-09 11:55:36	2015-03-09 11:56:40			2015-03-09	271.783	2015-03-09 07:23:49
1	12	1	x	x		2015-03-09 11:55:38	2015-03-09 11:57:05			2015-03-09	271.817	2015-03-09 07:23:49
1	12	1	x	x		2015-03-09 11:55:39	2015-03-09 11:58:02			2015-03-09	271.833	2015-03-09 07:23:49
1	12	1	x	x		2015-03-09 11:55:41	2015-03-09 12:02:07			2015-03-09	271.867	2015-03-09 07:23:49
1	12	1	x	x		2015-03-09 11:55:42	2015-03-09 12:03:42			2015-03-09	271.883	2015-03-09 07:23:49
1	12	1	x	x		2015-03-09 12:37:29	2015-03-09 12:37:30			2015-03-09	313.667	2015-03-09 07:23:49
1	12	1	x	x		2015-03-09 12:37:33	2015-03-09 12:38:27			2015-03-09	313.733	2015-03-09 07:23:49
1	12	1	x	x		2015-03-09 12:48:20	2015-03-09 12:49:08			2015-03-09	324.517	2015-03-09 07:23:49
1	12	1	x	x		2015-03-09 12:54:09	2015-03-09 12:54:17			2015-03-09	330.333	2015-03-09 07:23:49
1	12	1	x	x		2015-03-09 12:54:10	2015-03-09 12:54:17			2015-03-09	330.35	2015-03-09 07:23:49
1	12	1	x	x		2015-03-09 12:54:10	2015-03-09 12:54:18			2015-03-09	330.35	2015-03-09 07:23:49
1	12	1	x	x		2015-03-09 12:54:14	2015-03-09 12:54:18			2015-03-09	330.417	2015-03-09 07:23:49
1	12	1	x	x		2015-03-09 12:54:15	2015-03-09 12:54:19			2015-03-09	330.433	2015-03-09 07:23:49
1	12	1	x	x		2015-03-09 12:54:25	2015-03-09 13:02:55			2015-03-09	330.6	2015-03-09 07:23:49
1	12	1	x			2015-03-09 12:54:38				2015-03-09	330.817	2015-03-09 07:23:49
1	12	1	x			2015-03-09 12:54:40				2015-03-09	330.85	2015-03-09 07:23:49
1	12	1	x			2015-03-09 12:54:43				2015-03-09	330.9	2015-03-09 07:23:49
1	12	1	x	x		2015-03-09 13:37:15	2015-03-09 13:37:34			2015-03-09	373.433	2015-03-09 07:23:49
1	12	1	x	x		2015-03-09 13:37:26	2015-03-09 13:37:36			2015-03-09	373.617	2015-03-09 07:23:49
1	12	1	x			2015-03-09 14:24:37				2015-03-09	420.8	2015-03-09 07:23:49
1	12	2	x	x		2015-03-10 07:23:20	2015-03-10 07:41:18			2015-03-10	0	2015-03-10 07:23:20
1	12	2	x	x		2015-03-10 07:23:22	2015-03-10 07:42:25			2015-03-10	0.0333333	2015-03-10 07:23:20
1	12	2	x	x		2015-03-10 07:23:27	2015-03-10 07:43:09			2015-03-10	0.116667	2015-03-10 07:23:20
1	12	2	x	x	x	2015-03-10 07:23:31	2015-03-10 07:43:19	2015-03-10 07:44:52		2015-03-10	0.183333	2015-03-10 07:23:20
1	12	2	x	x		2015-03-10 07:23:35	2015-03-10 07:45:59			2015-03-10	0.25	2015-03-10 07:23:20
1	12	2	x	x		2015-03-10 07:23:41	2015-03-10 07:46:45			2015-03-10	0.35	2015-03-10 07:23:20
1	12	2	x	x		2015-03-10 07:23:43	2015-03-10 07:46:48			2015-03-10	0.383333	2015-03-10 07:23:20
1	12	2	x	x	x	2015-03-10 07:23:46	2015-03-10 07:47:07	2015-03-10 07:47:17		2015-03-10	0.433333	2015-03-10 07:23:20
1	12	2	x	x		2015-03-10 07:23:48	2015-03-10 07:48:03			2015-03-10	0.466667	2015-03-10 07:23:20
1	12	2	x	x		2015-03-10 07:23:50	2015-03-10 07:48:13			2015-03-10	0.5	2015-03-10 07:23:20
1	12	2	x	x		2015-03-10 07:23:52	2015-03-10 07:48:28			2015-03-10	0.533333	2015-03-10 07:23:20
1	12	2	x	x		2015-03-10 07:23:54	2015-03-10 07:48:36			2015-03-10	0.566667	2015-03-10 07:23:20
1	12	2	x	x		2015-03-10 07:23:57	2015-03-10 07:48:47			2015-03-10	0.616667	2015-03-10 07:23:20
1	12	2	x	x		2015-03-10 07:24:00	2015-03-10 07:48:58			2015-03-10	0.666667	2015-03-10 07:23:20
1	12	2	x	x		2015-03-10 07:24:09	2015-03-10 07:49:02			2015-03-10	0.816667	2015-03-10 07:23:20
1	12	2	x	x		2015-03-10 07:24:13	2015-03-10 07:49:22			2015-03-10	0.883333	2015-03-10 07:23:20
1	12	2	x	x		2015-03-10 07:24:16	2015-03-10 07:49:28			2015-03-10	0.933333	2015-03-10 07:23:20
1	12	2	x	x		2015-03-10 07:24:20	2015-03-10 07:49:35			2015-03-10	1	2015-03-10 07:23:20
1	12	2	x	x		2015-03-10 07:24:23	2015-03-10 07:50:36			2015-03-10	1.05	2015-03-10 07:23:20
1	12	2	x	x		2015-03-10 07:24:25	2015-03-10 07:50:45			2015-03-10	1.08333	2015-03-10 07:23:20
1	12	2	x	x		2015-03-10 07:24:30	2015-03-10 07:51:33			2015-03-10	1.16667	2015-03-10 07:23:20
1	12	2	x	x		2015-03-10 07:24:50	2015-03-10 07:51:55			2015-03-10	1.5	2015-03-10 07:23:20
1	12	2	x	x		2015-03-10 07:25:04	2015-03-10 07:52:26			2015-03-10	1.73333	2015-03-10 07:23:20
1	12	2	x	x		2015-03-10 07:25:18	2015-03-10 08:14:44			2015-03-10	1.96667	2015-03-10 07:23:20
1	12	2	x	x		2015-03-10 07:25:22	2015-03-10 08:26:04			2015-03-10	2.03333	2015-03-10 07:23:20
1	12	2	x	x		2015-03-10 07:25:39	2015-03-10 08:26:20			2015-03-10	2.31667	2015-03-10 07:23:20
1	12	2	x	x		2015-03-10 07:25:42	2015-03-10 08:27:47			2015-03-10	2.36667	2015-03-10 07:23:20
1	12	2	x	x		2015-03-10 07:26:05	2015-03-10 08:27:57			2015-03-10	2.75	2015-03-10 07:23:20
1	12	2	x	x		2015-03-10 07:26:09	2015-03-10 08:28:02			2015-03-10	2.81667	2015-03-10 07:23:20
1	12	2	x	x		2015-03-10 07:26:12	2015-03-10 08:29:38			2015-03-10	2.86667	2015-03-10 07:23:20
1	12	2	x	x		2015-03-10 07:26:15	2015-03-10 08:31:08			2015-03-10	2.91667	2015-03-10 07:23:20
1	12	2	x	x		2015-03-10 07:26:18	2015-03-10 08:31:20			2015-03-10	2.96667	2015-03-10 07:23:20
1	12	2	x	x		2015-03-10 07:26:34	2015-03-10 08:31:24			2015-03-10	3.23333	2015-03-10 07:23:20
1	12	2	x	x		2015-03-10 07:26:45	2015-03-10 08:31:53			2015-03-10	3.41667	2015-03-10 07:23:20
1	12	2	x	x		2015-03-10 07:26:47	2015-03-10 08:33:02			2015-03-10	3.45	2015-03-10 07:23:20
1	12	2	x	x		2015-03-10 07:28:06	2015-03-10 08:32:03			2015-03-10	4.76667	2015-03-10 07:23:20
1	12	2	x	x		2015-03-10 07:28:12	2015-03-10 08:35:27			2015-03-10	4.86667	2015-03-10 07:23:20
1	12	2	x	x		2015-03-10 07:28:21	2015-03-10 08:32:33			2015-03-10	5.01667	2015-03-10 07:23:20
1	12	2	x	x		2015-03-10 07:29:25	2015-03-10 08:33:47			2015-03-10	6.08333	2015-03-10 07:23:20
1	12	2	x	x		2015-03-10 07:31:41	2015-03-10 08:35:23			2015-03-10	8.35	2015-03-10 07:23:20
1	12	2	x	x		2015-03-10 07:33:04	2015-03-10 08:31:15			2015-03-10	9.73333	2015-03-10 07:23:20
1	12	2	x	x		2015-03-10 07:35:17	2015-03-10 08:11:15			2015-03-10	11.95	2015-03-10 07:23:20
1	12	2	x	x		2015-03-10 07:35:41	2015-03-10 08:11:17			2015-03-10	12.35	2015-03-10 07:23:20
1	12	2	x	x		2015-03-10 07:35:53	2015-03-10 08:11:20			2015-03-10	12.55	2015-03-10 07:23:20
1	12	2	x	x		2015-03-10 07:36:07	2015-03-10 08:11:41			2015-03-10	12.7833	2015-03-10 07:23:20
1	12	2	x	x		2015-03-10 07:36:09	2015-03-10 08:11:54			2015-03-10	12.8167	2015-03-10 07:23:20
1	12	2	x	x		2015-03-10 07:36:13	2015-03-10 08:12:29			2015-03-10	12.8833	2015-03-10 07:23:20
1	12	2	x	x		2015-03-10 07:37:04	2015-03-10 07:40:58			2015-03-10	13.7333	2015-03-10 07:23:20
1	12	2	x	x		2015-03-10 07:37:05	2015-03-10 08:12:57			2015-03-10	13.75	2015-03-10 07:23:20
1	12	2	x	x		2015-03-10 07:37:08	2015-03-10 08:13:20			2015-03-10	13.8	2015-03-10 07:23:20
1	12	2	x	x		2015-03-10 07:38:40	2015-03-10 08:17:08			2015-03-10	15.3333	2015-03-10 07:23:20
1	12	2	x	x		2015-03-10 07:40:06	2015-03-10 08:17:38			2015-03-10	16.7667	2015-03-10 07:23:20
1	12	2	x	x		2015-03-10 07:40:36	2015-03-10 08:18:23			2015-03-10	17.2667	2015-03-10 07:23:20
1	12	2	x	x		2015-03-10 07:41:34	2015-03-10 08:18:37			2015-03-10	18.2333	2015-03-10 07:23:20
1	12	2	x	x		2015-03-10 07:42:32	2015-03-10 08:19:58			2015-03-10	19.2	2015-03-10 07:23:20
1	12	2	x	x		2015-03-10 07:42:58	2015-03-10 08:20:53			2015-03-10	19.6333	2015-03-10 07:23:20
1	12	2	x	x		2015-03-10 07:44:49	2015-03-10 08:20:55			2015-03-10	21.4833	2015-03-10 07:23:20
1	12	2	x	x		2015-03-10 07:45:11	2015-03-10 08:21:03			2015-03-10	21.85	2015-03-10 07:23:20
1	12	2	x	x		2015-03-10 07:45:13	2015-03-10 08:22:10			2015-03-10	21.8833	2015-03-10 07:23:20
1	12	2	x	x		2015-03-10 07:45:28	2015-03-10 08:24:35			2015-03-10	22.1333	2015-03-10 07:23:20
1	12	2	x	x		2015-03-10 07:46:01	2015-03-10 08:26:59			2015-03-10	22.6833	2015-03-10 07:23:20
1	12	2	x	x		2015-03-10 07:46:07	2015-03-10 08:27:32			2015-03-10	22.7833	2015-03-10 07:23:20
1	12	2	x	x		2015-03-10 07:47:53	2015-03-10 08:28:49			2015-03-10	24.55	2015-03-10 07:23:20
1	12	2	x	x		2015-03-10 07:47:54	2015-03-10 08:28:51			2015-03-10	24.5667	2015-03-10 07:23:20
1	12	2	x	x		2015-03-10 07:48:01	2015-03-10 08:30:28			2015-03-10	24.6833	2015-03-10 07:23:20
1	12	2	x	x		2015-03-10 07:48:16	2015-03-10 08:32:10			2015-03-10	24.9333	2015-03-10 07:23:20
1	12	2	x	x		2015-03-10 07:48:26	2015-03-10 08:32:53			2015-03-10	25.1	2015-03-10 07:23:20
1	12	2	x	x		2015-03-10 07:48:48	2015-03-10 08:33:17			2015-03-10	25.4667	2015-03-10 07:23:20
1	12	2	x	x		2015-03-10 07:48:56	2015-03-10 08:35:16			2015-03-10	25.6	2015-03-10 07:23:20
1	12	2	x	x		2015-03-10 07:51:09	2015-03-10 08:37:01			2015-03-10	27.8167	2015-03-10 07:23:20
1	12	2	x	x		2015-03-10 07:52:23	2015-03-10 08:40:33			2015-03-10	29.05	2015-03-10 07:23:20
1	12	2	x	x		2015-03-10 08:04:00	2015-03-10 08:37:00			2015-03-10	40.6667	2015-03-10 07:23:20
1	12	2	x	x		2015-03-10 08:04:00	2015-03-10 08:37:00			2015-03-10	40.6667	2015-03-10 07:23:20
1	12	2	x	x		2015-03-10 08:04:00	2015-03-10 08:43:00			2015-03-10	40.6667	2015-03-10 07:23:20
1	12	2	x	x		2015-03-10 08:04:00	2015-03-10 08:43:00			2015-03-10	40.6667	2015-03-10 07:23:20
1	12	2	x	x		2015-03-10 08:04:00	2015-03-10 08:44:00			2015-03-10	40.6667	2015-03-10 07:23:20
1	12	2	x	x		2015-03-10 08:04:00	2015-03-10 08:44:00			2015-03-10	40.6667	2015-03-10 07:23:20
1	12	2	x	x		2015-03-10 08:06:00	2015-03-10 08:45:00			2015-03-10	42.6667	2015-03-10 07:23:20
1	12	2	x	x		2015-03-10 08:07:00	2015-03-10 08:46:00			2015-03-10	43.6667	2015-03-10 07:23:20
1	12	2	x	x		2015-03-10 08:07:00	2015-03-10 08:46:00			2015-03-10	43.6667	2015-03-10 07:23:20
1	12	2	x	x		2015-03-10 08:09:00	2015-03-10 08:46:00			2015-03-10	45.6667	2015-03-10 07:23:20
1	12	2	x	x		2015-03-10 08:09:00	2015-03-10 08:46:00			2015-03-10	45.6667	2015-03-10 07:23:20
1	12	2	x	x		2015-03-10 08:10:00	2015-03-10 08:46:00			2015-03-10	46.6667	2015-03-10 07:23:20
1	12	2	x	x		2015-03-10 08:12:00	2015-03-10 08:46:00			2015-03-10	48.6667	2015-03-10 07:23:20
1	12	2	x	x		2015-03-10 08:13:00	2015-03-10 08:46:00			2015-03-10	49.6667	2015-03-10 07:23:20
1	12	2	x	x		2015-03-10 08:16:00	2015-03-10 08:47:00			2015-03-10	52.6667	2015-03-10 07:23:20
1	12	2	x	x		2015-03-10 08:16:00	2015-03-10 08:47:00			2015-03-10	52.6667	2015-03-10 07:23:20
1	12	2	x	x		2015-03-10 08:17:00	2015-03-10 08:47:00			2015-03-10	53.6667	2015-03-10 07:23:20
1	12	2	x	x		2015-03-10 08:17:00	2015-03-10 08:48:00			2015-03-10	53.6667	2015-03-10 07:23:20
1	12	2	x	x		2015-03-10 08:21:00	2015-03-10 08:48:00			2015-03-10	57.6667	2015-03-10 07:23:20
1	12	2	x	x		2015-03-10 08:24:00	2015-03-10 08:49:00			2015-03-10	60.6667	2015-03-10 07:23:20
1	12	2	x	x		2015-03-10 08:25:00	2015-03-10 08:49:00			2015-03-10	61.6667	2015-03-10 07:23:20
1	12	2	x	x		2015-03-10 08:27:00	2015-03-10 08:49:00			2015-03-10	63.6667	2015-03-10 07:23:20
1	12	2	x	x		2015-03-10 08:28:00	2015-03-10 08:50:00			2015-03-10	64.6667	2015-03-10 07:23:20
1	12	2	x	x		2015-03-10 08:30:00	2015-03-10 08:50:00			2015-03-10	66.6667	2015-03-10 07:23:20
1	12	2	x	x		2015-03-10 08:30:00	2015-03-10 08:50:00			2015-03-10	66.6667	2015-03-10 07:23:20
1	12	2	x	x		2015-03-10 08:35:00	2015-03-10 08:52:00			2015-03-10	71.6667	2015-03-10 07:23:20
1	12	2	x	x		2015-03-10 08:42:00	2015-03-10 08:52:00			2015-03-10	78.6667	2015-03-10 07:23:20
1	12	2	x	x		2015-03-10 08:52:58	2015-03-10 08:53:03			2015-03-10	89.6333	2015-03-10 07:23:20
1	12	2	x	x		2015-03-10 08:53:35	2015-03-10 08:54:25			2015-03-10	90.25	2015-03-10 07:23:20
1	12	2	x	x		2015-03-10 08:53:45	2015-03-10 08:54:27			2015-03-10	90.4167	2015-03-10 07:23:20
1	12	2	x	x		2015-03-10 09:01:58	2015-03-10 09:01:59			2015-03-10	98.6333	2015-03-10 07:23:20
1	12	2	x	x		2015-03-10 09:02:04	2015-03-10 09:02:06			2015-03-10	98.7333	2015-03-10 07:23:20
1	12	2	x	x		2015-03-10 09:11:28	2015-03-10 09:11:32			2015-03-10	108.133	2015-03-10 07:23:20
1	12	2	x	x		2015-03-10 09:16:48	2015-03-10 09:19:18			2015-03-10	113.467	2015-03-10 07:23:20
1	12	2	x	x		2015-03-10 09:19:31	2015-03-10 09:20:06			2015-03-10	116.183	2015-03-10 07:23:20
1	12	2	x	x		2015-03-10 09:22:22	2015-03-10 09:22:24			2015-03-10	119.033	2015-03-10 07:23:20
1	12	2	x	x		2015-03-10 09:22:27	2015-03-10 09:22:29			2015-03-10	119.117	2015-03-10 07:23:20
1	12	2	x	x		2015-03-10 09:30:14	2015-03-10 09:30:15			2015-03-10	126.9	2015-03-10 07:23:20
1	12	2	x	x		2015-03-10 09:32:16	2015-03-10 09:32:17			2015-03-10	128.933	2015-03-10 07:23:20
1	12	2	x	x		2015-03-10 09:52:30	2015-03-10 09:52:31			2015-03-10	149.167	2015-03-10 07:23:20
1	12	2	x	x	x	2015-03-10 10:11:29	2015-03-10 10:11:32	2015-03-10 10:11:37		2015-03-10	168.15	2015-03-10 07:23:20
1	12	2	x	x		2015-03-10 10:53:36	2015-03-10 10:53:37			2015-03-10	210.267	2015-03-10 07:23:20
1	12	2	x			2015-03-10 11:40:28				2015-03-10	257.133	2015-03-10 07:23:20
1	12	2	x			2015-03-10 11:52:42				2015-03-10	269.367	2015-03-10 07:23:20
1	12	2	x	x		2015-03-10 12:01:54	2015-03-10 12:01:56			2015-03-10	278.567	2015-03-10 07:23:20
1	12	2	x	x		2015-03-10 14:05:19	2015-03-10 14:06:47			2015-03-10	401.983	2015-03-10 07:23:20
1	12	2	x	x		2015-03-10 14:10:52	2015-03-10 14:11:43			2015-03-10	407.533	2015-03-10 07:23:20
1	13	1	x	x		2015-03-12 07:27:21	2015-03-12 07:27:23			2015-03-12	0	2015-03-12 07:27:21
1	13	1	x	x		2015-03-12 07:27:26	2015-03-12 07:27:30			2015-03-12	0.0833333	2015-03-12 07:27:21
1	13	1	x	x		2015-03-12 07:27:53	2015-03-12 07:28:08			2015-03-12	0.533417	2015-03-12 07:27:20
1	13	1	x	x		2015-03-12 07:29:12	2015-03-12 07:29:35			2015-03-12	1.85008	2015-03-12 07:27:20
1	13	1	x	x		2015-03-12 07:30:26	2015-03-12 07:30:30			2015-03-12	3.08342	2015-03-12 07:27:20
1	13	1	x	x		2015-03-12 07:31:56	2015-03-12 07:31:57			2015-03-12	4.58342	2015-03-12 07:27:20
1	13	1	x	x		2015-03-12 07:32:36	2015-03-12 07:32:43			2015-03-12	5.25008	2015-03-12 07:27:20
1	13	1	x	x		2015-03-12 07:33:24	2015-03-12 07:34:04			2015-03-12	6.05008	2015-03-12 07:27:20
1	13	1	x	x		2015-03-12 07:34:35	2015-03-12 07:34:42			2015-03-12	7.23342	2015-03-12 07:27:20
1	13	1	x	x		2015-03-12 07:34:38	2015-03-12 07:34:46			2015-03-12	7.28342	2015-03-12 07:27:20
1	13	1	x	x		2015-03-12 07:35:53	2015-03-12 07:51:25			2015-03-12	8.53342	2015-03-12 07:27:20
1	13	1	x	x	x	2015-03-12 07:35:56	2015-03-12 07:52:02	2015-03-12 08:21:24		2015-03-12	8.58342	2015-03-12 07:27:20
1	13	1	x	x		2015-03-12 07:38:40	2015-03-12 07:58:54			2015-03-12	11.3168	2015-03-12 07:27:20
1	13	1	x	x		2015-03-12 07:38:41	2015-03-12 07:57:00			2015-03-12	11.3334	2015-03-12 07:27:20
1	13	1	x	x		2015-03-12 07:38:55	2015-03-12 07:57:00			2015-03-12	11.5668	2015-03-12 07:27:20
1	13	1	x	x		2015-03-12 07:39:06	2015-03-12 07:57:00			2015-03-12	11.7501	2015-03-12 07:27:20
1	13	1	x	x		2015-03-12 07:39:15	2015-03-12 07:57:00			2015-03-12	11.9001	2015-03-12 07:27:20
1	13	1	x	x		2015-03-12 07:39:17	2015-03-12 07:57:00			2015-03-12	11.9334	2015-03-12 07:27:20
1	13	1	x	x		2015-03-12 07:39:35	2015-03-12 07:57:00			2015-03-12	12.2334	2015-03-12 07:27:20
1	13	1	x	x		2015-03-12 07:39:48	2015-03-12 07:57:00			2015-03-12	12.4501	2015-03-12 07:27:20
1	13	1	x	x		2015-03-12 07:39:52	2015-03-12 07:57:00			2015-03-12	12.5168	2015-03-12 07:27:20
1	13	1	x	x		2015-03-12 07:43:20	2015-03-12 07:57:00			2015-03-12	15.9834	2015-03-12 07:27:20
1	13	1	x	x		2015-03-12 07:43:22	2015-03-12 07:57:00			2015-03-12	16.0168	2015-03-12 07:27:20
1	13	1	x	x		2015-03-12 07:43:56	2015-03-12 07:57:00			2015-03-12	16.5834	2015-03-12 07:27:20
1	13	1	x	x		2015-03-12 07:45:03	2015-03-12 07:57:00			2015-03-12	17.7001	2015-03-12 07:27:20
1	13	1	x	x		2015-03-12 07:48:59	2015-03-12 07:57:00			2015-03-12	21.6334	2015-03-12 07:27:20
1	13	1	x	x		2015-03-12 07:49:38	2015-03-12 07:57:00			2015-03-12	22.2834	2015-03-12 07:27:20
1	13	1	x	x		2015-03-12 07:49:53	2015-03-12 07:57:00			2015-03-12	22.5334	2015-03-12 07:27:20
1	13	1	x	x		2015-03-12 07:50:00	2015-03-12 07:57:00			2015-03-12	22.6501	2015-03-12 07:27:20
1	13	1	x	x		2015-03-12 07:50:02	2015-03-12 07:57:00			2015-03-12	22.6834	2015-03-12 07:27:20
1	13	1	x	x		2015-03-12 07:51:57	2015-03-12 07:57:00			2015-03-12	24.6001	2015-03-12 07:27:20
1	13	1	x	x		2015-03-12 07:53:40	2015-03-12 07:57:00			2015-03-12	26.3168	2015-03-12 07:27:20
1	13	1	x	x	x	2015-03-12 07:55:06	2015-03-12 07:57:56	2015-03-12 08:13:59		2015-03-12	27.7501	2015-03-12 07:27:20
1	13	1	x	x	x	2015-03-12 07:55:24	2015-03-12 07:59:14	2015-03-12 08:14:06		2015-03-12	28.0501	2015-03-12 07:27:20
1	13	1	x	x		2015-03-12 07:57:20	2015-03-12 07:59:19			2015-03-12	29.9834	2015-03-12 07:27:20
1	13	1	x	x		2015-03-12 07:58:00	2015-03-12 08:00:00			2015-03-12	30.6501	2015-03-12 07:27:20
1	13	1	x	x		2015-03-12 07:58:05	2015-03-12 08:28:36			2015-03-12	30.7334	2015-03-12 07:27:20
1	13	1	x	x		2015-03-12 07:58:08	2015-03-12 08:28:39			2015-03-12	30.7834	2015-03-12 07:27:20
1	13	1	x	x		2015-03-12 07:59:09	2015-03-12 08:28:49			2015-03-12	31.8001	2015-03-12 07:27:20
1	13	1	x	x		2015-03-12 08:01:41	2015-03-12 08:28:50			2015-03-12	34.3334	2015-03-12 07:27:20
1	13	1	x	x		2015-03-12 08:01:47	2015-03-12 08:28:54			2015-03-12	34.4334	2015-03-12 07:27:20
1	13	1	x	x		2015-03-12 08:02:38	2015-03-12 08:28:56			2015-03-12	35.2834	2015-03-12 07:27:20
1	13	1	x	x		2015-03-12 08:03:23	2015-03-12 08:28:57			2015-03-12	36.0334	2015-03-12 07:27:20
1	13	1	x	x		2015-03-12 08:03:49	2015-03-12 08:28:58			2015-03-12	36.4668	2015-03-12 07:27:20
1	13	1	x	x		2015-03-12 08:05:01	2015-03-12 08:29:01			2015-03-12	37.6668	2015-03-12 07:27:20
1	13	1	x	x		2015-03-12 08:05:04	2015-03-12 08:29:08			2015-03-12	37.7168	2015-03-12 07:27:20
1	13	1	x	x		2015-03-12 08:24:56	2015-03-12 08:29:10			2015-03-12	57.5834	2015-03-12 07:27:20
1	13	1	x	x		2015-03-12 08:26:21	2015-03-12 08:29:16			2015-03-12	59.0001	2015-03-12 07:27:20
1	13	1	x	x		2015-03-12 08:33:29	2015-03-12 08:40:23			2015-03-12	66.1334	2015-03-12 07:27:20
1	13	1	x	x		2015-03-12 08:34:31	2015-03-12 08:43:52			2015-03-12	67.1668	2015-03-12 07:27:20
1	13	1	x	x		2015-03-12 08:36:22	2015-03-12 08:43:53			2015-03-12	69.0168	2015-03-12 07:27:20
1	13	1	x	x		2015-03-12 08:36:27	2015-03-12 08:43:56			2015-03-12	69.1001	2015-03-12 07:27:20
1	13	1	x	x		2015-03-12 08:41:46	2015-03-12 08:44:03			2015-03-12	74.4168	2015-03-12 07:27:20
1	13	1	x	x		2015-03-12 08:44:44	2015-03-12 08:44:50			2015-03-12	77.3834	2015-03-12 07:27:20
1	13	1	x	x		2015-03-12 08:44:45	2015-03-12 08:44:51			2015-03-12	77.4001	2015-03-12 07:27:20
1	13	1	x	x	x	2015-03-12 08:45:51	2015-03-12 08:45:53	2015-03-12 08:49:14	2015-03-12 10:45:00	2015-03-12	78.5001	2015-03-12 07:27:20
1	13	1	x	x		2015-03-12 08:53:50	2015-03-12 09:10:22			2015-03-12	86.4834	2015-03-12 07:27:20
1	13	1	x	x		2015-03-12 09:10:31	2015-03-12 09:10:32			2015-03-12	103.167	2015-03-12 07:27:20
1	13	1	x	x		2015-03-12 09:14:55	2015-03-12 09:21:13			2015-03-12	107.567	2015-03-12 07:27:20
1	13	1	x	x		2015-03-12 09:45:25	2015-03-12 09:54:30			2015-03-12	138.067	2015-03-12 07:27:20
1	13	1	x	x		2015-03-12 09:48:09	2015-03-12 09:54:31			2015-03-12	140.8	2015-03-12 07:27:20
1	13	1	x	x		2015-03-12 09:57:10	2015-03-12 09:57:12			2015-03-12	149.817	2015-03-12 07:27:20
1	13	1	x	x		2015-03-12 10:15:40	2015-03-12 10:34:19			2015-03-12	168.317	2015-03-12 07:27:20
1	13	1	x	x		2015-03-12 10:24:02	2015-03-12 10:34:19			2015-03-12	176.683	2015-03-12 07:27:20
1	13	1	x	x		2015-03-12 10:34:02	2015-03-12 10:37:18			2015-03-12	186.683	2015-03-12 07:27:20
1	13	1	x	x		2015-03-12 10:34:13	2015-03-12 10:34:16			2015-03-12	186.867	2015-03-12 07:27:20
1	13	1	x	x		2015-03-12 10:34:14	2015-03-12 10:34:16			2015-03-12	186.883	2015-03-12 07:27:20
1	13	1	x	x		2015-03-12 10:39:50	2015-03-12 10:39:51			2015-03-12	192.483	2015-03-12 07:27:20
1	13	1	x	x		2015-03-12 10:40:43	2015-03-12 10:40:45			2015-03-12	193.367	2015-03-12 07:27:20
1	13	1	x	x		2015-03-12 12:51:49	2015-03-12 12:51:50	2015-03-12 12:55:00	2015-03-12 15:05:00	2015-03-12	324.467	2015-03-12 07:27:20
1	13	1	x	x		2015-03-12 13:29:04	2015-03-12 13:29:13			2015-03-12	361.717	2015-03-12 07:27:20
1	13	1	x			2015-03-12 13:45:57				2015-03-12	378.6	2015-03-12 07:27:20
1	13	2	x	x		2015-03-13 07:57:10	2015-03-13 07:57:36			2015-03-13	0	2015-03-13 07:57:10
1	13	2	x	x		2015-03-13 07:57:15	2015-03-13 07:57:38			2015-03-13	0.0833333	2015-03-13 07:57:10
1	13	2	x	x		2015-03-13 07:57:17	2015-03-13 07:57:38			2015-03-13	0.116667	2015-03-13 07:57:10
1	13	2	x	x		2015-03-13 07:57:18	2015-03-13 07:57:39			2015-03-13	0.133333	2015-03-13 07:57:10
1	13	2	x	x		2015-03-13 07:57:19	2015-03-13 07:57:41			2015-03-13	0.15	2015-03-13 07:57:10
1	13	2	x	x		2015-03-13 07:57:21	2015-03-13 07:57:48			2015-03-13	0.183333	2015-03-13 07:57:10
1	13	2	x	x	x	2015-03-13 07:57:23	2015-03-13 07:58:08	2015-03-13 08:12:51		2015-03-13	0.216667	2015-03-13 07:57:10
1	13	2	x	x		2015-03-13 07:57:27	2015-03-13 07:58:10			2015-03-13	0.283333	2015-03-13 07:57:10
1	13	2	x	x		2015-03-13 07:58:16	2015-03-13 07:58:18			2015-03-13	1.1	2015-03-13 07:57:10
1	13	2	x	x		2015-03-13 07:58:24	2015-03-13 07:58:22			2015-03-13	1.23333	2015-03-13 07:57:10
1	13	2	x	x		2015-03-13 07:58:27	2015-03-13 07:58:28			2015-03-13	1.28333	2015-03-13 07:57:10
1	13	2	x	x		2015-03-13 07:58:34	2015-03-13 07:58:43			2015-03-13	1.4	2015-03-13 07:57:10
1	13	2	x	x		2015-03-13 07:58:47	2015-03-13 07:58:53			2015-03-13	1.61667	2015-03-13 07:57:10
1	13	2	x	x		2015-03-13 07:58:48	2015-03-13 07:59:02			2015-03-13	1.63333	2015-03-13 07:57:10
1	13	2	x	x		2015-03-13 07:59:10	2015-03-13 07:59:14			2015-03-13	2	2015-03-13 07:57:10
1	13	2	x	x		2015-03-13 07:59:25	2015-03-13 07:59:29			2015-03-13	2.25	2015-03-13 07:57:10
1	13	2	x	x		2015-03-13 08:00:16	2015-03-13 08:00:24			2015-03-13	3.1	2015-03-13 07:57:10
1	13	2	x	x		2015-03-13 08:00:23	2015-03-13 08:00:43			2015-03-13	3.21667	2015-03-13 07:57:10
1	13	2	x	x		2015-03-13 08:00:51	2015-03-13 08:00:58			2015-03-13	3.68333	2015-03-13 07:57:10
1	13	2	x	x		2015-03-13 08:01:11	2015-03-13 08:01:22			2015-03-13	4.01667	2015-03-13 07:57:10
1	13	2	x	x		2015-03-13 08:01:12	2015-03-13 08:01:25			2015-03-13	4.03333	2015-03-13 07:57:10
1	13	2	x	x		2015-03-13 08:01:13	2015-03-13 08:01:28			2015-03-13	4.05	2015-03-13 07:57:10
1	13	2	x	x		2015-03-13 08:01:30	2015-03-13 08:01:33			2015-03-13	4.33333	2015-03-13 07:57:10
1	13	2	x	x		2015-03-13 08:01:54	2015-03-13 08:01:58			2015-03-13	4.73333	2015-03-13 07:57:10
1	13	2	x			2015-03-13 08:02:01				2015-03-13	4.85	2015-03-13 07:57:10
1	13	2	x	x		2015-03-13 08:02:09	2015-03-13 08:02:15			2015-03-13	4.98333	2015-03-13 07:57:10
1	13	2	x	x		2015-03-13 08:02:30	2015-03-13 08:02:34			2015-03-13	5.33333	2015-03-13 07:57:10
1	13	2	x	x		2015-03-13 08:02:38	2015-03-13 08:02:52			2015-03-13	5.46667	2015-03-13 07:57:10
1	13	2	x	x		2015-03-13 08:02:56	2015-03-13 08:03:48			2015-03-13	5.76667	2015-03-13 07:57:10
1	13	2	x	x		2015-03-13 08:03:16	2015-03-13 08:04:29			2015-03-13	6.1	2015-03-13 07:57:10
1	13	2	x	x		2015-03-13 08:03:18	2015-03-13 08:04:53			2015-03-13	6.13333	2015-03-13 07:57:10
1	13	2	x	x		2015-03-13 08:04:58	2015-03-13 08:05:01			2015-03-13	7.8	2015-03-13 07:57:10
1	13	2	x	x		2015-03-13 08:05:06	2015-03-13 08:05:07			2015-03-13	7.93333	2015-03-13 07:57:10
1	13	2	x	x		2015-03-13 08:05:10	2015-03-13 08:05:14			2015-03-13	8	2015-03-13 07:57:10
1	13	2	x	x		2015-03-13 08:05:34	2015-03-13 08:05:39			2015-03-13	8.4	2015-03-13 07:57:10
1	13	2	x	x		2015-03-13 08:05:36	2015-03-13 08:05:52			2015-03-13	8.43333	2015-03-13 07:57:10
1	13	2	x	x		2015-03-13 08:06:34	2015-03-13 08:14:15			2015-03-13	9.4	2015-03-13 07:57:10
1	13	2	x	x		2015-03-13 08:09:18	2015-03-13 08:15:18			2015-03-13	12.1333	2015-03-13 07:57:10
1	13	2	x	x		2015-03-13 08:09:33	2015-03-13 08:15:34			2015-03-13	12.3833	2015-03-13 07:57:10
1	13	2	x	x		2015-03-13 08:09:34	2015-03-13 08:15:39			2015-03-13	12.4	2015-03-13 07:57:10
1	13	2	x	x		2015-03-13 08:09:36	2015-03-13 08:15:41			2015-03-13	12.4333	2015-03-13 07:57:10
1	13	2	x	x		2015-03-13 08:10:20	2015-03-13 08:15:49			2015-03-13	13.1667	2015-03-13 07:57:10
1	13	2	x	x		2015-03-13 08:10:37	2015-03-13 08:15:50			2015-03-13	13.45	2015-03-13 07:57:10
1	13	2	x	x		2015-03-13 08:10:51	2015-03-13 08:16:15			2015-03-13	13.6833	2015-03-13 07:57:10
1	13	2	x	x		2015-03-13 08:10:54	2015-03-13 08:16:46			2015-03-13	13.7333	2015-03-13 07:57:10
1	13	2	x	x		2015-03-13 08:11:02	2015-03-13 08:16:53			2015-03-13	13.8667	2015-03-13 07:57:10
1	13	2	x	x		2015-03-13 08:11:12	2015-03-13 08:16:56			2015-03-13	14.0333	2015-03-13 07:57:10
1	13	2	x	x		2015-03-13 08:12:01	2015-03-13 08:17:00			2015-03-13	14.85	2015-03-13 07:57:10
1	13	2	x	x		2015-03-13 08:12:22	2015-03-13 08:17:14			2015-03-13	15.2	2015-03-13 07:57:10
1	13	2	x	x		2015-03-13 08:12:23	2015-03-13 08:13:07			2015-03-13	15.2167	2015-03-13 07:57:10
1	13	2	x	x		2015-03-13 08:12:25	2015-03-13 08:13:22			2015-03-13	15.25	2015-03-13 07:57:10
1	13	2	x	x		2015-03-13 08:13:12	2015-03-13 08:13:25			2015-03-13	16.0333	2015-03-13 07:57:10
1	13	2	x	x		2015-03-13 08:15:13	2015-03-13 08:17:19			2015-03-13	18.05	2015-03-13 07:57:10
1	13	2	x	x		2015-03-13 08:16:36	2015-03-13 08:17:21			2015-03-13	19.4333	2015-03-13 07:57:10
1	13	2	x	x		2015-03-13 08:16:41	2015-03-13 08:17:24			2015-03-13	19.5167	2015-03-13 07:57:10
1	13	2	x	x		2015-03-13 08:17:15	2015-03-13 08:18:09			2015-03-13	20.0833	2015-03-13 07:57:10
1	13	2	x	x		2015-03-13 08:17:17	2015-03-13 08:19:25			2015-03-13	20.1167	2015-03-13 07:57:10
1	13	2	x	x		2015-03-13 08:19:01	2015-03-13 08:19:07			2015-03-13	21.85	2015-03-13 07:57:10
1	13	2	x	x		2015-03-13 08:19:31	2015-03-13 08:19:39			2015-03-13	22.35	2015-03-13 07:57:10
1	13	2	x	x		2015-03-13 08:19:44	2015-03-13 08:19:50			2015-03-13	22.5667	2015-03-13 07:57:10
1	13	2	x	x		2015-03-13 08:19:51	2015-03-13 08:19:54			2015-03-13	22.6833	2015-03-13 07:57:10
1	13	2	x	x		2015-03-13 08:22:16	2015-03-13 08:22:25			2015-03-13	25.1	2015-03-13 07:57:10
1	13	2	x	x		2015-03-13 08:22:33	2015-03-13 08:22:38			2015-03-13	25.3833	2015-03-13 07:57:10
1	13	2	x	x		2015-03-13 08:25:48	2015-03-13 08:26:01			2015-03-13	28.6333	2015-03-13 07:57:10
1	13	2	x	x		2015-03-13 08:27:18	2015-03-13 08:27:20			2015-03-13	30.1333	2015-03-13 07:57:10
1	13	2	x	x		2015-03-13 08:28:25	2015-03-13 08:28:30			2015-03-13	31.25	2015-03-13 07:57:10
1	13	2	x	x		2015-03-13 08:29:02	2015-03-13 08:29:06			2015-03-13	31.8667	2015-03-13 07:57:10
1	13	2	x	x		2015-03-13 08:30:22	2015-03-13 08:30:40			2015-03-13	33.2	2015-03-13 07:57:10
1	13	2	x	x		2015-03-13 08:30:25	2015-03-13 08:30:46			2015-03-13	33.25	2015-03-13 07:57:10
1	13	2	x	x		2015-03-13 08:31:25	2015-03-13 08:32:30			2015-03-13	34.25	2015-03-13 07:57:10
1	13	2	x	x		2015-03-13 08:32:13	2015-03-13 08:32:39			2015-03-13	35.05	2015-03-13 07:57:10
1	13	2	x	x		2015-03-13 08:34:44	2015-03-13 08:34:46			2015-03-13	37.5667	2015-03-13 07:57:10
1	13	2	x	x		2015-03-13 08:39:24	2015-03-13 08:39:28			2015-03-13	42.2333	2015-03-13 07:57:10
1	13	2	x	x		2015-03-13 08:40:08	2015-03-13 08:41:53			2015-03-13	42.9667	2015-03-13 07:57:10
1	13	2	x	x		2015-03-13 08:41:57	2015-03-13 08:41:59			2015-03-13	44.7833	2015-03-13 07:57:10
1	13	2	x	x		2015-03-13 08:44:37	2015-03-13 08:44:39			2015-03-13	47.45	2015-03-13 07:57:10
1	13	2	x	x		2015-03-13 08:46:35	2015-03-13 08:46:37			2015-03-13	49.4167	2015-03-13 07:57:10
1	13	2	x	x		2015-03-13 08:47:22	2015-03-13 08:47:23			2015-03-13	50.2	2015-03-13 07:57:10
1	13	2	x	x		2015-03-13 08:47:45	2015-03-13 08:47:47			2015-03-13	50.5833	2015-03-13 07:57:10
1	13	2	x	x		2015-03-13 08:48:46	2015-03-13 08:48:47			2015-03-13	51.6	2015-03-13 07:57:10
1	13	2	x	x		2015-03-13 08:49:28	2015-03-13 08:49:29			2015-03-13	52.3	2015-03-13 07:57:10
1	13	2	x	x	x	2015-03-13 08:52:43	2015-03-13 08:52:44	2015-03-13 09:02:38	2015-03-13 10:10:00	2015-03-13	55.55	2015-03-13 07:57:10
1	13	2	x	x		2015-03-13 08:57:26	2015-03-13 08:57:28			2015-03-13	60.2667	2015-03-13 07:57:10
1	13	2	x	x		2015-03-13 09:50:25	2015-03-13 09:50:47			2015-03-13	113.25	2015-03-13 07:57:10
1	13	2	x			2015-03-13 11:09:36				2015-03-13	192.433	2015-03-13 07:57:10
1	13	2	x			2015-03-13 11:29:24				2015-03-13	212.233	2015-03-13 07:57:10
1	13	2	x			2015-03-13 11:47:45				2015-03-13	230.583	2015-03-13 07:57:10
1	13	2	x			2015-03-13 13:37:04				2015-03-13	339.9	2015-03-13 07:57:10
1	13	2	x			2015-03-13 13:57:10				2015-03-13	360	2015-03-13 07:57:10
2	14	1	x	x		2015-09-14 08:41:33	2015-09-14 08:41:46				0	2015-09-14 08:41:33
2	14	1	x	x		2015-09-14 08:42:28	2015-09-14 08:42:30				0.916667	2015-09-14 08:41:33
2	14	1	x	x		2015-09-14 08:42:39	2015-09-14 08:42:43				1.1	2015-09-14 08:41:33
2	14	1	x	x		2015-09-14 08:43:07	2015-09-14 08:43:09				1.56667	2015-09-14 08:41:33
2	14	1	x	x		2015-09-14 08:43:51	2015-09-14 08:44:14				2.3	2015-09-14 08:41:33
2	14	1	x	x		2015-09-14 08:44:04	2015-09-14 08:44:28				2.51667	2015-09-14 08:41:33
2	14	1	x	x		2015-09-14 08:45:08	2015-09-14 08:45:20				3.58333	2015-09-14 08:41:33
2	14	1	x	x		2015-09-14 08:46:19	2015-09-14 08:46:46				4.76667	2015-09-14 08:41:33
2	14	1	x	x		2015-09-14 08:46:57	2015-09-14 08:47:13				5.4	2015-09-14 08:41:33
2	14	1	x	x		2015-09-14 08:49:03	2015-09-14 08:49:08				7.5	2015-09-14 08:41:33
2	14	1	x	x	x	2015-09-14 08:49:34	2015-09-14 08:49:39	2015-09-14 08:51:43			8.01667	2015-09-14 08:41:33
2	14	1	x	x		2015-09-14 08:56:20	2015-09-14 08:56:28				14.7833	2015-09-14 08:41:33
2	14	1	x	x		2015-09-14 08:56:49	2015-09-14 08:56:55				15.2667	2015-09-14 08:41:33
2	14	1	x	x		2015-09-14 08:57:35	2015-09-14 08:58:03				16.0333	2015-09-14 08:41:33
2	14	1	x	x		2015-09-14 08:58:29	2015-09-14 08:58:56				16.9333	2015-09-14 08:41:33
2	14	1	x	x		2015-09-14 08:59:19	2015-09-14 08:59:34				17.7667	2015-09-14 08:41:33
2	14	1	x	x		2015-09-14 09:00:22	2015-09-14 09:00:45				18.8167	2015-09-14 08:41:33
2	14	1	x	x		2015-09-14 09:02:08	2015-09-14 09:02:16				20.5833	2015-09-14 08:41:33
2	14	1	x	x		2015-09-14 09:03:15	2015-09-14 09:03:28				21.7	2015-09-14 08:41:33
2	14	1	x	x		2015-09-14 09:05:47	2015-09-14 09:06:01				24.2333	2015-09-14 08:41:33
2	14	1	x	x		2015-09-14 09:07:07	2015-09-14 09:07:19				25.5667	2015-09-14 08:41:33
2	14	1	x	x		2015-09-14 09:10:40	2015-09-14 09:10:52				29.1167	2015-09-14 08:41:33
2	14	1	x	x		2015-09-14 09:12:15	2015-09-14 09:12:23				30.7	2015-09-14 08:41:33
2	14	1	x	x		2015-09-14 09:12:51	2015-09-14 09:13:01				31.3	2015-09-14 08:41:33
2	14	1	x	x		2015-09-14 09:13:03	2015-09-14 09:13:13				31.5	2015-09-14 08:41:33
2	14	1	x	x		2015-09-14 09:18:03	2015-09-14 09:24:12				36.5	2015-09-14 08:41:33
2	14	1	x	x		2015-09-14 09:21:29	2015-09-14 09:22:27				39.9333	2015-09-14 08:41:33
2	14	1	x	x		2015-09-14 09:32:20	2015-09-14 09:32:33				50.7833	2015-09-14 08:41:33
2	14	1	x	x		2015-09-14 09:33:27	2015-09-14 09:33:38				51.9	2015-09-14 08:41:33
2	14	1	x	x		2015-09-14 09:34:07	2015-09-14 09:34:37				52.5667	2015-09-14 08:41:33
2	14	1	x	x		2015-09-14 09:35:26	2015-09-14 09:35:35				53.8833	2015-09-14 08:41:33
2	14	1	x	x		2015-09-14 09:37:09	2015-09-14 09:38:08				55.6	2015-09-14 08:41:33
2	14	1	x	x		2015-09-14 09:37:11	2015-09-14 09:38:28				55.6333	2015-09-14 08:41:33
2	14	1	x	x		2015-09-14 09:51:35	2015-09-14 09:52:13				70.0333	2015-09-14 08:41:33
2	14	1	x	x		2015-09-14 10:04:25	2015-09-14 10:04:48				82.8667	2015-09-14 08:41:33
2	14	1	x	x		2015-09-14 10:06:18	2015-09-14 10:06:50				84.75	2015-09-14 08:41:33
2	14	1	x	x		2015-09-14 10:16:21	2015-09-14 10:16:48				94.8	2015-09-14 08:41:33
2	14	1	x	x		2015-09-14 10:29:25	2015-09-14 10:29:30				107.867	2015-09-14 08:41:33
2	14	1	x	x		2015-09-14 10:34:57	2015-09-14 10:35:09				113.4	2015-09-14 08:41:33
2	14	1	x	x		2015-09-14 10:35:15	2015-09-14 10:35:18				113.7	2015-09-14 08:41:33
2	14	1	x	x		2015-09-14 10:36:37	2015-09-14 10:36:40				115.067	2015-09-14 08:41:33
2	14	1	x	x		2015-09-14 10:39:29	2015-09-14 10:39:31				117.933	2015-09-14 08:41:33
2	14	1	x			2015-09-14 10:44:09					122.6	2015-09-14 08:41:33
2	14	1	x	x		2015-09-14 10:48:25	2015-09-14 10:49:21				126.867	2015-09-14 08:41:33
2	14	1	x	x		2015-09-14 10:54:49	2015-09-14 10:54:53				133.267	2015-09-14 08:41:33
2	14	1	x	x		2015-09-14 10:55:57	2015-09-14 10:55:59				134.4	2015-09-14 08:41:33
2	14	1	x	x		2015-09-14 10:57:36	2015-09-14 10:57:38				136.05	2015-09-14 08:41:33
2	14	1	x	x		2015-09-14 11:03:14	2015-09-14 11:03:26				141.683	2015-09-14 08:41:33
2	14	1	x	x		2015-09-14 11:03:52	2015-09-14 11:04:13				142.317	2015-09-14 08:41:33
2	14	1	x	x		2015-09-14 11:40:50	2015-09-14 11:41:05				179.283	2015-09-14 08:41:33
2	14	1	x			2015-09-14 11:54:47					193.233	2015-09-14 08:41:33
2	14	1	x	x		2015-09-14 11:56:34	2015-09-14 11:56:53				195.017	2015-09-14 08:41:33
2	14	1	x	x		2015-09-14 11:57:05	2015-09-14 11:57:41				195.533	2015-09-14 08:41:33
2	14	1	x	x		2015-09-14 11:58:43	2015-09-14 11:59:53				197.167	2015-09-14 08:41:33
2	14	1	x	x		2015-09-14 12:20:02	2015-09-14 12:20:06				218.483	2015-09-14 08:41:33
2	14	1	x	x		2015-09-14 12:48:07	2015-09-14 12:48:10				246.567	2015-09-14 08:41:33
2	14	1	x	x		2015-09-14 14:09:31	2015-09-14 14:10:25				327.967	2015-09-14 08:41:33
2	14	2	x	x		2015-09-15 08:33:03	2015-09-15 08:33:22				0	2015-09-15 08:33:03
2	14	2	x	x		2015-09-15 08:33:44	2015-09-15 08:33:52				0.683333	2015-09-15 08:33:03
2	14	2	x	x		2015-09-15 08:33:59	2015-09-15 08:35:48				0.933417	2015-09-15 08:33:02
2	14	2	x	x		2015-09-15 08:39:44	2015-09-15 08:39:47				6.68342	2015-09-15 08:33:02
2	14	2	x	x		2015-09-15 08:39:58	2015-09-15 08:40:05				6.91675	2015-09-15 08:33:02
2	14	2	x	x		2015-09-15 08:41:16	2015-09-15 08:41:40				8.21675	2015-09-15 08:33:02
2	14	2	x	x		2015-09-15 08:43:06	2015-09-15 08:43:10				10.0501	2015-09-15 08:33:02
2	14	2	x	x		2015-09-15 08:44:19	2015-09-15 08:44:50				11.2667	2015-09-15 08:33:02
2	14	2	x	x		2015-09-15 08:45:18	2015-09-15 08:45:32				12.2501	2015-09-15 08:33:02
2	14	2	x	x		2015-09-15 08:45:38	2015-09-15 08:45:44				12.5834	2015-09-15 08:33:02
2	14	2	x	x		2015-09-15 08:47:10	2015-09-15 08:47:18				14.1167	2015-09-15 08:33:02
2	14	2	x	x		2015-09-15 08:47:55	2015-09-15 08:47:57				14.8668	2015-09-15 08:33:02
2	14	2	x	x		2015-09-15 08:50:02	2015-09-15 08:50:10				16.9834	2015-09-15 08:33:02
2	14	2	x	x		2015-09-15 08:51:21	2015-09-15 08:51:31				18.3001	2015-09-15 08:33:02
2	14	2	x	x		2015-09-15 08:54:21	2015-09-15 08:54:27				21.3001	2015-09-15 08:33:02
2	14	2	x	x		2015-09-15 08:54:42	2015-09-15 08:55:03				21.6501	2015-09-15 08:33:02
2	14	2	x	x		2015-09-15 08:56:30	2015-09-15 08:57:23				23.4501	2015-09-15 08:33:02
2	14	2	x	x		2015-09-15 08:57:36	2015-09-15 08:58:39				24.5501	2015-09-15 08:33:02
2	14	2	x	x		2015-09-15 08:59:30	2015-09-15 09:00:02				26.4501	2015-09-15 08:33:02
2	14	2	x	x		2015-09-15 09:01:22	2015-09-15 09:02:05				28.3168	2015-09-15 08:33:02
2	14	2	x	x		2015-09-15 09:01:58	2015-09-15 09:03:02				28.9167	2015-09-15 08:33:02
2	14	2	x	x		2015-09-15 09:03:41	2015-09-15 09:03:45				30.6334	2015-09-15 08:33:02
2	14	2	x	x		2015-09-15 09:04:15	2015-09-15 09:04:26				31.2001	2015-09-15 08:33:02
2	14	2	x	x		2015-09-15 09:05:28	2015-09-15 09:06:33				32.4167	2015-09-15 08:33:02
2	14	2	x	x		2015-09-15 09:09:09	2015-09-15 09:10:04				36.1001	2015-09-15 08:33:02
2	14	2	x	x		2015-09-15 09:09:35	2015-09-15 09:10:50				36.5334	2015-09-15 08:33:02
2	14	2	x	x		2015-09-15 09:10:31	2015-09-15 09:11:39				37.4667	2015-09-15 08:33:02
2	14	2	x	x		2015-09-15 09:11:25	2015-09-15 09:12:02				38.3667	2015-09-15 08:33:02
2	14	2	x	x		2015-09-15 09:11:32	2015-09-15 09:12:47				38.4834	2015-09-15 08:33:02
2	14	2	x	x		2015-09-15 09:12:38	2015-09-15 09:13:08				39.5834	2015-09-15 08:33:02
2	14	2	x	x		2015-09-15 09:12:42	2015-09-15 09:13:55				39.6501	2015-09-15 08:33:02
2	14	2	x	x		2015-09-15 09:14:26	2015-09-15 09:15:33				41.3834	2015-09-15 08:33:02
2	14	2	x	x		2015-09-15 09:16:39	2015-09-15 09:17:31				43.6001	2015-09-15 08:33:02
2	14	2	x	x		2015-09-15 09:19:12	2015-09-15 09:19:31				46.1501	2015-09-15 08:33:02
2	14	2	x	x		2015-09-15 09:19:14	2015-09-15 09:20:39				46.1834	2015-09-15 08:33:02
2	14	2	x	x		2015-09-15 09:20:27	2015-09-15 09:21:14				47.4001	2015-09-15 08:33:02
2	14	2	x	x		2015-09-15 09:24:15	2015-09-15 09:24:35				51.2001	2015-09-15 08:33:02
2	14	2	x	x		2015-09-15 09:26:44	2015-09-15 09:27:30				53.6834	2015-09-15 08:33:02
2	14	2	x	x		2015-09-15 09:26:45	2015-09-15 09:29:24				53.7001	2015-09-15 08:33:02
2	14	2	x	x		2015-09-15 09:31:45	2015-09-15 09:32:59				58.7001	2015-09-15 08:33:02
2	14	2	x	x		2015-09-15 09:34:12	2015-09-15 09:34:50				61.1501	2015-09-15 08:33:02
2	14	2	x	x		2015-09-15 09:37:53	2015-09-15 09:39:33				64.8334	2015-09-15 08:33:02
2	14	2	x	x		2015-09-15 09:38:06	2015-09-15 09:40:22				65.0501	2015-09-15 08:33:02
2	14	2	x	x		2015-09-15 09:38:08	2015-09-15 09:40:27				65.0834	2015-09-15 08:33:02
2	14	2	x	x		2015-09-15 09:38:24	2015-09-15 09:41:30				65.3501	2015-09-15 08:33:02
2	14	2	x	x		2015-09-15 09:39:02	2015-09-15 09:42:41				65.9834	2015-09-15 08:33:02
2	14	2	x	x		2015-09-15 09:41:22	2015-09-15 09:43:42				68.3167	2015-09-15 08:33:02
2	14	2	x	x		2015-09-15 09:45:07	2015-09-15 09:46:10				72.0667	2015-09-15 08:33:02
2	14	2	x	x		2015-09-15 09:51:58	2015-09-15 09:53:00				78.9168	2015-09-15 08:33:02
2	14	2	x	x		2015-09-15 09:51:59	2015-09-15 09:53:30				78.9334	2015-09-15 08:33:02
2	14	2	x	x		2015-09-15 09:52:02	2015-09-15 09:53:53				78.9834	2015-09-15 08:33:02
2	14	2	x	x		2015-09-15 09:58:30	2015-09-15 10:00:11				85.4501	2015-09-15 08:33:02
2	14	2	x	x		2015-09-15 10:01:43	2015-09-15 10:02:39				88.6667	2015-09-15 08:33:02
2	14	2	x	x		2015-09-15 10:03:59	2015-09-15 10:04:25				90.9334	2015-09-15 08:33:02
2	14	2	x	x		2015-09-15 10:04:55	2015-09-15 10:07:15				91.8668	2015-09-15 08:33:02
2	14	2	x	x		2015-09-15 10:11:20	2015-09-15 10:12:16				98.2834	2015-09-15 08:33:02
2	14	2	x	x		2015-09-15 10:12:31	2015-09-15 10:13:15				99.4667	2015-09-15 08:33:02
2	14	2	x	x		2015-09-15 10:13:57	2015-09-15 10:14:13				100.9	2015-09-15 08:33:02
2	14	2	x	x		2015-09-15 10:17:37	2015-09-15 10:17:58				104.567	2015-09-15 08:33:02
2	14	2	x	x		2015-09-15 10:19:36	2015-09-15 10:19:55				106.55	2015-09-15 08:33:02
2	14	2	x	x		2015-09-15 10:26:19	2015-09-15 10:26:51				113.267	2015-09-15 08:33:02
2	14	2	x	x		2015-09-15 10:26:24	2015-09-15 10:28:12				113.35	2015-09-15 08:33:02
2	14	2	x	x		2015-09-15 10:36:12	2015-09-15 10:39:09				123.15	2015-09-15 08:33:02
2	14	2	x	x		2015-09-15 10:37:32	2015-09-15 10:39:44				124.483	2015-09-15 08:33:02
2	14	2	x	x		2015-09-15 10:43:59	2015-09-15 10:51:16				130.933	2015-09-15 08:33:02
2	14	2	x	x		2015-09-15 10:45:18	2015-09-15 10:52:09				132.25	2015-09-15 08:33:02
2	14	2	x	x	x	2015-09-15 10:46:48	2015-09-15 10:53:30	2015-09-15 10:56:29			133.75	2015-09-15 08:33:02
2	14	2	x	x		2015-09-15 10:48:32	2015-09-15 10:55:32				135.483	2015-09-15 08:33:02
2	14	2	x	x		2015-09-15 10:56:38	2015-09-15 11:02:42				143.583	2015-09-15 08:33:02
2	14	2	x	x		2015-09-15 11:35:38	2015-09-15 11:35:42				182.583	2015-09-15 08:33:02
2	14	2	x	x		2015-09-15 11:58:03	2015-09-15 11:58:27				205	2015-09-15 08:33:02
2	14	2	x	x		2015-09-15 12:07:29	2015-09-15 12:07:36				214.433	2015-09-15 08:33:02
2	14	2	x	x		2015-09-15 12:17:31	2015-09-15 12:18:23				224.467	2015-09-15 08:33:02
2	14	2	x	x		2015-09-15 12:17:33	2015-09-15 12:19:02				224.5	2015-09-15 08:33:02
2	14	2	x	x		2015-09-15 12:45:53	2015-09-15 12:46:44				252.833	2015-09-15 08:33:02
2	14	2	x	x		2015-09-15 13:08:31	2015-09-15 13:08:34				275.467	2015-09-15 08:33:02
2	14	2	x	x		2015-09-15 14:42:45	2015-09-15 14:42:48				369.7	2015-09-15 08:33:02
2	14	2	x	x		2015-09-15 15:24:27	2015-09-15 15:24:45				411.4	2015-09-15 08:33:02
2	15	1	x	x		2015-09-17 09:00:08	2015-09-17 09:00:47				0	2015-09-17 09:00:08
2	15	1	x	x		2015-09-17 09:00:14	2015-09-17 09:02:00				0.1	2015-09-17 09:00:08
2	15	1	x	x		2015-09-17 09:00:23	2015-09-17 09:02:56				0.250083	2015-09-17 09:00:07
2	15	1	x	x		2015-09-17 09:01:14	2015-09-17 09:04:28				1.10008	2015-09-17 09:00:07
2	15	1	x	x		2015-09-17 09:03:41	2015-09-17 09:06:05				3.55008	2015-09-17 09:00:07
2	15	1	x	x		2015-09-17 09:03:57	2015-09-17 09:06:22				3.81675	2015-09-17 09:00:07
2	15	1	x	x		2015-09-17 09:04:07	2015-09-17 09:06:36				3.98342	2015-09-17 09:00:07
2	15	1	x	x		2015-09-17 09:06:34	2015-09-17 09:06:46				6.43342	2015-09-17 09:00:07
2	15	1	x	x		2015-09-17 09:11:42	2015-09-17 09:12:01				11.5668	2015-09-17 09:00:07
2	15	1	x	x		2015-09-17 09:20:44	2015-09-17 09:20:49				20.6001	2015-09-17 09:00:07
2	15	1	x			2015-09-17 09:22:32					22.4001	2015-09-17 09:00:07
2	15	1	x	x		2015-09-17 09:22:46	2015-09-17 09:27:40				22.6334	2015-09-17 09:00:07
2	15	1	x	x		2015-09-17 09:24:58	2015-09-17 09:28:57				24.8334	2015-09-17 09:00:07
2	15	1	x	x		2015-09-17 09:25:13	2015-09-17 09:29:11				25.0834	2015-09-17 09:00:07
2	15	1	x	x		2015-09-17 09:25:22	2015-09-17 09:30:05				25.2334	2015-09-17 09:00:07
2	15	1	x			2015-09-17 09:28:31					28.3834	2015-09-17 09:00:07
2	15	1	x	x		2015-09-17 09:36:43	2015-09-17 09:36:53				36.5834	2015-09-17 09:00:07
2	15	1	x	x		2015-09-17 09:38:02	2015-09-17 09:38:19				37.9001	2015-09-17 09:00:07
2	15	1	x	x		2015-09-17 09:41:26	2015-09-17 09:41:35				41.3001	2015-09-17 09:00:07
2	15	1	x	x		2015-09-17 09:41:31	2015-09-17 09:42:35				41.3834	2015-09-17 09:00:07
2	15	1	x	x		2015-09-17 09:42:33	2015-09-17 09:42:53				42.4168	2015-09-17 09:00:07
2	15	1	x	x		2015-09-17 09:48:54	2015-09-17 09:49:06				48.7668	2015-09-17 09:00:07
2	15	1	x	x		2015-09-17 09:49:00	2015-09-17 09:49:16				48.8668	2015-09-17 09:00:07
2	15	1	x	x		2015-09-17 09:51:07	2015-09-17 09:54:48				50.9834	2015-09-17 09:00:07
2	15	1	x	x	x	2015-09-17 09:54:58	2015-09-17 09:56:05	2015-09-17 09:59:41			54.8334	2015-09-17 09:00:07
2	15	1	x	x	x	2015-09-17 10:01:39	2015-09-17 10:02:30	2015-09-17 10:06:10			61.5168	2015-09-17 09:00:07
2	15	1	x	x	x	2015-09-17 10:01:44	2015-09-17 10:03:46	2015-09-17 10:06:14			61.6001	2015-09-17 09:00:07
2	15	1	x	x		2015-09-17 10:03:41	2015-09-17 10:08:14				63.5501	2015-09-17 09:00:07
2	15	1	x	x		2015-09-17 10:07:26	2015-09-17 10:09:21				67.3001	2015-09-17 09:00:07
2	15	1	x	x		2015-09-17 10:08:06	2015-09-17 10:10:47				67.9668	2015-09-17 09:00:07
2	15	1	x	x		2015-09-17 10:14:28	2015-09-17 10:15:51				74.3334	2015-09-17 09:00:07
2	15	1	x	x		2015-09-17 10:14:30	2015-09-17 10:16:54				74.3668	2015-09-17 09:00:07
2	15	1	x	x		2015-09-17 10:22:16	2015-09-17 10:22:31				82.1334	2015-09-17 09:00:07
2	15	1	x	x		2015-09-17 10:25:14	2015-09-17 10:25:27				85.1001	2015-09-17 09:00:07
2	15	1	x	x		2015-09-17 10:26:27	2015-09-17 10:27:04				86.3168	2015-09-17 09:00:07
2	15	1	x	x	x	2015-09-17 10:29:52	2015-09-17 10:29:54	2015-09-17 10:29:56			89.7334	2015-09-17 09:00:07
2	15	1	x	x		2015-09-17 10:33:30	2015-09-17 10:34:47				93.3668	2015-09-17 09:00:07
2	15	1	x	x		2015-09-17 10:44:28	2015-09-17 10:46:26				104.333	2015-09-17 09:00:07
2	15	1	x	x		2015-09-17 10:46:56	2015-09-17 10:49:04				106.8	2015-09-17 09:00:07
2	15	1	x	x	x	2015-09-17 10:54:57	2015-09-17 10:56:23	2015-09-17 10:58:30			114.817	2015-09-17 09:00:07
2	15	1	x	x		2015-09-17 10:55:56	2015-09-17 11:00:53				115.8	2015-09-17 09:00:07
2	15	1	x	x		2015-09-17 10:56:03	2015-09-17 11:01:13				115.917	2015-09-17 09:00:07
2	15	1	x	x		2015-09-17 11:28:29	2015-09-17 11:31:04				148.35	2015-09-17 09:00:07
2	15	1	x	x		2015-09-17 11:34:47	2015-09-17 11:35:33				154.65	2015-09-17 09:00:07
2	15	1	x	x		2015-09-17 13:12:13	2015-09-17 13:12:37				252.083	2015-09-17 09:00:07
2	15	1	x	x	x	2015-09-17 14:31:34	2015-09-17 14:31:52	2015-09-17 14:34:18			331.433	2015-09-17 09:00:07
2	15	1	x	x		2015-09-17 15:31:25	2015-09-17 15:31:34				391.283	2015-09-17 09:00:07
2	15	2	x	x		2015-09-18 07:36:33	2015-09-18 07:37:16				0	2015-09-18 07:36:33
2	15	2	x	x		2015-09-18 07:36:36	2015-09-18 07:37:44				0.05	2015-09-18 07:36:33
2	15	2	x	x		2015-09-18 07:37:26	2015-09-18 07:37:57				0.883333	2015-09-18 07:36:33
2	15	2	x	x		2015-09-18 07:37:27	2015-09-18 07:38:07				0.9	2015-09-18 07:36:33
2	15	2	x	x		2015-09-18 07:37:59	2015-09-18 07:39:04				1.43333	2015-09-18 07:36:33
2	15	2	x	x	x	2015-09-18 07:38:30	2015-09-18 07:39:38	2015-09-18 07:41:13			1.95	2015-09-18 07:36:33
2	15	2	x	x		2015-09-18 07:38:31	2015-09-18 07:41:15				1.96667	2015-09-18 07:36:33
2	15	2	x	x		2015-09-18 07:38:33	2015-09-18 07:41:42				2	2015-09-18 07:36:33
2	15	2	x	x	x	2015-09-18 07:41:22	2015-09-18 07:43:13	2015-09-18 07:44:10			4.81667	2015-09-18 07:36:33
2	15	2	x	x		2015-09-18 07:41:23	2015-09-18 07:44:44				4.83333	2015-09-18 07:36:33
2	15	2	x	x		2015-09-18 07:41:24	2015-09-18 07:45:57				4.85	2015-09-18 07:36:33
2	15	2	x	x	x	2015-09-18 07:41:26	2015-09-18 07:46:45	2015-09-18 07:48:28			4.88333	2015-09-18 07:36:33
2	15	2	x	x		2015-09-18 07:44:46	2015-09-18 07:48:51				8.21667	2015-09-18 07:36:33
2	15	2	x	x		2015-09-18 07:44:47	2015-09-18 07:49:45				8.23333	2015-09-18 07:36:33
2	15	2	x	x	x	2015-09-18 07:44:50	2015-09-18 07:50:40	2015-09-18 07:51:32			8.28333	2015-09-18 07:36:33
2	15	2	x	x		2015-09-18 07:46:55	2015-09-18 07:52:10				10.3667	2015-09-18 07:36:33
2	15	2	x	x		2015-09-18 07:52:35	2015-09-18 07:53:07				16.0333	2015-09-18 07:36:33
2	15	2	x	x		2015-09-18 07:52:36	2015-09-18 07:53:58				16.05	2015-09-18 07:36:33
2	15	2	x	x		2015-09-18 07:54:29	2015-09-18 07:54:50				17.9333	2015-09-18 07:36:33
2	15	2	x	x		2015-09-18 07:54:30	2015-09-18 07:55:34				17.95	2015-09-18 07:36:33
2	15	2	x	x		2015-09-18 07:57:42	2015-09-18 07:58:49				21.15	2015-09-18 07:36:33
2	15	2	x	x	x	2015-09-18 07:58:45	2015-09-18 07:59:33	2015-09-18 08:03:08			22.2	2015-09-18 07:36:33
2	15	2	x	x		2015-09-18 08:00:48	2015-09-18 08:04:26				24.25	2015-09-18 07:36:33
2	15	2	x	x		2015-09-18 08:03:44	2015-09-18 08:04:30				27.1833	2015-09-18 07:36:33
2	15	2	x	x		2015-09-18 08:03:50	2015-09-18 08:04:48				27.2833	2015-09-18 07:36:33
2	15	2	x	x		2015-09-18 08:05:46	2015-09-18 08:06:13				29.2167	2015-09-18 07:36:33
2	15	2	x	x		2015-09-18 08:05:56	2015-09-18 08:06:38				29.3833	2015-09-18 07:36:33
2	15	2	x	x		2015-09-18 08:06:10	2015-09-18 08:06:56				29.6167	2015-09-18 07:36:33
2	15	2	x	x		2015-09-18 08:06:42	2015-09-18 08:06:58				30.15	2015-09-18 07:36:33
2	15	2	x	x		2015-09-18 08:06:44	2015-09-18 08:07:04				30.1833	2015-09-18 07:36:33
2	15	2	x	x		2015-09-18 08:08:29	2015-09-18 08:09:50				31.9333	2015-09-18 07:36:33
2	15	2	x	x	x	2015-09-18 08:08:30	2015-09-18 08:10:00	2015-09-18 08:13:04			31.95	2015-09-18 07:36:33
2	15	2	x	x		2015-09-18 08:08:32	2015-09-18 08:14:31				31.9833	2015-09-18 07:36:33
2	15	2	x	x		2015-09-18 08:13:06	2015-09-18 08:13:35				36.55	2015-09-18 07:36:33
2	15	2	x	x		2015-09-18 08:13:23	2015-09-18 08:14:56				36.8333	2015-09-18 07:36:33
2	15	2	x	x		2015-09-18 08:13:32	2015-09-18 08:15:17				36.9833	2015-09-18 07:36:33
2	15	2	x	x		2015-09-18 08:17:34	2015-09-18 08:18:38				41.0167	2015-09-18 07:36:33
2	15	2	x	x		2015-09-18 08:29:05	2015-09-18 08:29:59				52.5333	2015-09-18 07:36:33
2	15	2	x			2015-09-18 08:32:12					55.65	2015-09-18 07:36:33
2	15	2	x	x		2015-09-18 08:39:34	2015-09-18 08:39:41				63.0167	2015-09-18 07:36:33
2	15	2	x	x		2015-09-18 08:41:59	2015-09-18 08:42:21				65.4333	2015-09-18 07:36:33
2	15	2	x	x		2015-09-18 08:43:41	2015-09-18 08:43:57				67.1333	2015-09-18 07:36:33
2	15	2	x	x		2015-09-18 08:49:40	2015-09-18 08:54:33				73.1167	2015-09-18 07:36:33
2	15	2	x	x		2015-09-18 08:51:23	2015-09-18 08:56:26				74.8333	2015-09-18 07:36:33
2	15	2	x	x		2015-09-18 09:05:20	2015-09-18 09:05:22				88.7833	2015-09-18 07:36:33
2	15	2	x	x		2015-09-18 09:07:25	2015-09-18 09:07:28				90.8667	2015-09-18 07:36:33
2	15	2	x	x		2015-09-18 09:14:32	2015-09-18 09:14:39				97.9833	2015-09-18 07:36:33
2	15	2	x	x		2015-09-18 09:15:21	2015-09-18 09:16:15				98.8	2015-09-18 07:36:33
2	15	2	x	x		2015-09-18 09:15:42	2015-09-18 09:16:45				99.15	2015-09-18 07:36:33
2	15	2	x	x		2015-09-18 09:19:09	2015-09-18 09:19:36				102.6	2015-09-18 07:36:33
2	15	2	x			2015-09-18 09:24:12					107.65	2015-09-18 07:36:33
2	15	2	x	x		2015-09-18 09:24:14	2015-09-18 09:53:59				107.683	2015-09-18 07:36:33
2	15	2	x	x		2015-09-18 09:28:43	2015-09-18 09:54:18				112.167	2015-09-18 07:36:33
2	15	2	x	x		2015-09-18 09:32:44	2015-09-18 09:44:11				116.183	2015-09-18 07:36:33
2	15	2	x	x		2015-09-18 09:33:11	2015-09-18 09:43:19				116.633	2015-09-18 07:36:33
2	15	2	x	x		2015-09-18 09:37:13	2015-09-18 09:42:34				120.667	2015-09-18 07:36:33
2	15	2	x			2015-09-18 09:40:02					123.483	2015-09-18 07:36:33
2	15	2	x	x		2015-09-18 09:49:45	2015-09-18 09:49:50				133.2	2015-09-18 07:36:33
2	15	2	x	x		2015-09-18 09:53:23	2015-09-18 09:54:45				136.833	2015-09-18 07:36:33
2	15	2	x	x		2015-09-18 10:00:24	2015-09-18 10:05:35				143.85	2015-09-18 07:36:33
2	15	2	x	x		2015-09-18 10:06:59	2015-09-18 10:07:05				150.433	2015-09-18 07:36:33
2	15	2	x	x		2015-09-18 10:08:44	2015-09-18 10:08:46				152.183	2015-09-18 07:36:33
2	15	2	x	x		2015-09-18 10:15:05	2015-09-18 10:17:44				158.533	2015-09-18 07:36:33
2	15	2	x	x		2015-09-18 10:18:17	2015-09-18 10:18:41				161.733	2015-09-18 07:36:33
2	15	2	x	x		2015-09-18 10:21:17	2015-09-18 10:22:58				164.733	2015-09-18 07:36:33
2	15	2	x	x		2015-09-18 10:45:07	2015-09-18 10:45:37				188.567	2015-09-18 07:36:33
2	15	2	x	x		2015-09-18 10:45:08	2015-09-18 10:45:40				188.583	2015-09-18 07:36:33
2	15	2	x	x	x	2015-09-18 10:45:57	2015-09-18 10:46:30	2015-09-18 10:48:01			189.4	2015-09-18 07:36:33
2	15	2	x	x		2015-09-18 11:42:12	2015-09-18 11:42:18				245.65	2015-09-18 07:36:33
2	15	2	x	x	x	2015-09-18 11:56:39	2015-09-18 12:12:49	2015-09-18 12:14:33			260.1	2015-09-18 07:36:33
2	15	2	x	x	x	2015-09-18 12:28:10	2015-09-18 12:28:13	2015-09-18 12:31:07			291.617	2015-09-18 07:36:33
2	15	2	x	x	x	2015-09-18 13:45:33	2015-09-18 13:45:37	2015-09-18 13:49:31			369	2015-09-18 07:36:33
2	15	2	x	x		2015-09-18 14:13:43	2015-09-18 14:13:47				397.167	2015-09-18 07:36:33
2	15	2	x	x		2015-09-18 14:16:58	2015-09-18 14:17:15				400.417	2015-09-18 07:36:33
2	16	1	x	x		2015-09-21 07:31:44	2015-09-21 07:33:34				0	2015-09-21 07:31:44
2	16	1	x	x		2015-09-21 07:33:31	2015-09-21 07:33:44				1.78333	2015-09-21 07:31:44
2	16	1	x			2015-09-21 07:34:32					2.80008	2015-09-21 07:31:43
2	16	1	x			2015-09-21 07:34:33					2.81675	2015-09-21 07:31:43
2	16	1	x			2015-09-21 07:34:34					2.83342	2015-09-21 07:31:43
2	16	1	x			2015-09-21 07:34:35					2.85008	2015-09-21 07:31:43
2	16	1	x			2015-09-21 07:34:36					2.86675	2015-09-21 07:31:43
2	16	1	x			2015-09-21 07:34:37					2.88342	2015-09-21 07:31:43
2	16	1	x			2015-09-21 07:34:38					2.90008	2015-09-21 07:31:43
2	16	1	x			2015-09-21 07:34:39					2.91675	2015-09-21 07:31:43
2	16	1	x			2015-09-21 07:34:40					2.93342	2015-09-21 07:31:43
2	16	1	x			2015-09-21 07:34:41					2.95008	2015-09-21 07:31:43
2	16	1	x			2015-09-21 07:34:42					2.96675	2015-09-21 07:31:43
2	16	1	x			2015-09-21 07:34:59					3.25008	2015-09-21 07:31:43
2	16	1	x	x		2015-09-21 07:37:39	2015-09-21 07:45:20				5.91675	2015-09-21 07:31:43
2	16	1	x	x		2015-09-21 07:40:23	2015-09-21 07:45:29				8.65008	2015-09-21 07:31:43
2	16	1	x	x		2015-09-21 07:40:48	2015-09-21 07:45:32				9.06675	2015-09-21 07:31:43
2	16	1	x	x		2015-09-21 07:40:54	2015-09-21 07:46:12				9.16675	2015-09-21 07:31:43
2	16	1	x	x		2015-09-21 07:41:10	2015-09-21 07:47:08				9.43342	2015-09-21 07:31:43
2	16	1	x	x		2015-09-21 07:42:16	2015-09-21 07:47:29				10.5334	2015-09-21 07:31:43
2	16	1	x	x		2015-09-21 07:46:17	2015-09-21 07:49:26				14.5501	2015-09-21 07:31:43
2	16	1	x	x		2015-09-21 07:48:56	2015-09-21 07:51:49				17.2001	2015-09-21 07:31:43
2	16	1	x	x		2015-09-21 07:49:18	2015-09-21 07:53:47				17.5667	2015-09-21 07:31:43
2	16	1	x	x		2015-09-21 07:50:35	2015-09-21 07:54:19				18.8501	2015-09-21 07:31:43
2	16	1	x	x		2015-09-21 07:54:22	2015-09-21 07:59:04				22.6334	2015-09-21 07:31:43
2	16	1	x	x		2015-09-21 07:54:24	2015-09-21 08:00:04				22.6668	2015-09-21 07:31:43
2	16	1	x	x		2015-09-21 07:56:23	2015-09-21 08:00:11				24.6501	2015-09-21 07:31:43
2	16	1	x	x		2015-09-21 07:56:31	2015-09-21 08:01:13				24.7834	2015-09-21 07:31:43
2	16	1	x	x		2015-09-21 07:56:57	2015-09-21 08:01:18				25.2167	2015-09-21 07:31:43
2	16	1	x	x		2015-09-21 07:58:43	2015-09-21 08:01:37				26.9834	2015-09-21 07:31:43
2	16	1	x	x		2015-09-21 07:58:59	2015-09-21 08:02:18				27.2501	2015-09-21 07:31:43
2	16	1	x	x		2015-09-21 07:59:11	2015-09-21 08:04:50				27.4501	2015-09-21 07:31:43
2	16	1	x	x		2015-09-21 07:59:15	2015-09-21 08:05:40				27.5167	2015-09-21 07:31:43
2	16	1	x	x		2015-09-21 08:02:12	2015-09-21 08:06:23				30.4668	2015-09-21 07:31:43
2	16	1	x	x		2015-09-21 08:02:16	2015-09-21 08:07:46				30.5334	2015-09-21 07:31:43
2	16	1	x	x		2015-09-21 08:02:32	2015-09-21 08:09:38				30.8001	2015-09-21 07:31:43
2	16	1	x	x		2015-09-21 08:05:20	2015-09-21 08:11:04				33.6001	2015-09-21 07:31:43
2	16	1	x	x		2015-09-21 08:05:21	2015-09-21 08:11:20				33.6167	2015-09-21 07:31:43
2	16	1	x	x		2015-09-21 08:05:22	2015-09-21 08:13:21				33.6334	2015-09-21 07:31:43
2	16	1	x	x		2015-09-21 08:05:36	2015-09-21 08:16:12				33.8667	2015-09-21 07:31:43
2	16	1	x	x		2015-09-21 08:17:03	2015-09-21 08:17:15				45.3167	2015-09-21 07:31:43
2	16	1	x	x		2015-09-21 08:17:18	2015-09-21 08:17:42				45.5667	2015-09-21 07:31:43
2	16	1	x	x		2015-09-21 08:17:59	2015-09-21 08:18:04				46.2501	2015-09-21 07:31:43
2	16	1	x	x		2015-09-21 08:18:03	2015-09-21 08:18:05				46.3167	2015-09-21 07:31:43
2	16	1	x	x		2015-09-21 08:18:09	2015-09-21 08:18:11				46.4167	2015-09-21 07:31:43
2	16	1	x	x		2015-09-21 08:18:29	2015-09-21 08:19:07				46.7501	2015-09-21 07:31:43
2	16	1	x	x		2015-09-21 08:18:31	2015-09-21 08:19:46				46.7834	2015-09-21 07:31:43
2	16	1	x	x		2015-09-21 08:18:32	2015-09-21 08:19:54				46.8001	2015-09-21 07:31:43
2	16	1	x	x		2015-09-21 08:18:34	2015-09-21 08:20:15				46.8334	2015-09-21 07:31:43
2	16	1	x	x		2015-09-21 08:21:42	2015-09-21 08:21:44				49.9668	2015-09-21 07:31:43
2	16	1	x	x		2015-09-21 08:24:55	2015-09-21 08:25:07				53.1834	2015-09-21 07:31:43
2	16	1	x	x		2015-09-21 08:25:46	2015-09-21 08:26:03				54.0334	2015-09-21 07:31:43
2	16	1	x	x		2015-09-21 08:27:52	2015-09-21 08:28:09				56.1334	2015-09-21 07:31:43
2	16	1	x	x		2015-09-21 08:27:54	2015-09-21 08:28:32				56.1667	2015-09-21 07:31:43
2	16	1	x	x		2015-09-21 08:31:22	2015-09-21 08:34:01				59.6334	2015-09-21 07:31:43
2	16	1	x	x		2015-09-21 08:34:02	2015-09-21 08:34:20				62.3001	2015-09-21 07:31:43
2	16	1	x	x		2015-09-21 08:34:04	2015-09-21 08:34:39				62.3334	2015-09-21 07:31:43
2	16	1	x			2015-09-21 08:34:06					62.3667	2015-09-21 07:31:43
2	16	1	x	x		2015-09-21 08:36:12	2015-09-21 08:36:28				64.4667	2015-09-21 07:31:43
2	16	1	x	x		2015-09-21 08:36:40	2015-09-21 08:38:08				64.9334	2015-09-21 07:31:43
2	16	1	x	x		2015-09-21 08:42:16	2015-09-21 08:42:18				70.5334	2015-09-21 07:31:43
2	16	1	x	x		2015-09-21 08:42:49	2015-09-21 08:43:54				71.0834	2015-09-21 07:31:43
2	16	1	x	x		2015-09-21 08:44:51	2015-09-21 08:45:03				73.1167	2015-09-21 07:31:43
2	16	1	x	x		2015-09-21 08:45:16	2015-09-21 08:45:59				73.5334	2015-09-21 07:31:43
2	16	1	x	x		2015-09-21 08:46:50	2015-09-21 08:48:06				75.1001	2015-09-21 07:31:43
[truncated: 1,384 more rows]

## Sheet: Sensitivity Data
G/A	Clinic	Age (months)	Sex	Presenting Complaint	SCREEN +	SCREEN (drink/breast feed?)	SCREEN (vomit?)	SCREEN (convulsions?)	SCREEN (lethargic / unconscious?)	SCREEN age	SCREEN hosp	SCREEN Other (breathing etc.)	Temp	Resp rate	Heart rate	Weight (above or below med)	Trauma	IMCI	DANGER SIGN	Cough/ Breathing	Diarrhea	Fever	Measles	Ear Problem	Malnutrition /Anemia	HIV	TB	Infection / Janudice	Diarrhea	Congenital	Risk Factors	HIV	Feeding / Growth	SATS Category	SATS :Emergency	SATS :Very Urgent	SATS:Urgent	ETAT	ETAT:Emergency Signs	ETAT:Priority Signs	IMCI by Nurse	IMCI Self Assessment
1	1	41	M	Rash on scalp and pain	0								36	.	.	Normal	0	1				1												None				None			0	0
1	1	38	F	Cough, loss of appetite, fever	1								37.1	38	.	Normal	0	1				1												None				None			1	1
1	1	9	M	Diarrhean and Vomiting	1								36	.	.	Below	0	2			2				1									Urgent			Some respiratory distress	Priority		Respiratory distress	2	2
1	1	9	M	Fever and Coughing	1								36.9	44	.	Normal	0	1		1		1												None				None			0	0
1	1	33	M	Vomiting Solids	1								36.2	.	.	Normal	0	1			1													Urgent			Respiratory Distress	Priority		Respiratory distress	1	1
1	1	27	F	Diarrhea	1								36	.	.	Normal	0	1			1													Urgent			Respiratory Distress	Priority		Respiratory distress	1	1
1	1	27	F	Coughing and Tight Chest	0								36.8	46	.	Normal	0	1		2		1												None				None			0	0
1	1	24	F	Mouth sores loss of appetite	1								36.5	.	.	Below	0	1							1									None				None			1	1
1	1	23	M	Fever and sore throat	1								36.6	.	.	Normal	0	1				1												None				None			0	0
1	1	33	F	Fever and sore throat	1								37	.	.	Normal	0	1				1												None				None			0	0
1	1	9	F	Diarrhea and vomiting	1	0	1	0	0	0	0		36	.	.	Below	0	2			2				1									None				None			0	0
1	1	31	M	Cough and vomiting	1	1	0	0	0	0	0		36.8	30	.	Normal	0	0																None				None			0	0
1	1	43	M	Cough loss of appetite, stomach cramps	1	1	0	0	0	0	0		36.2	46	.	Normal	0	1		1														None				None			1	1
1	1	24	F	Diarrhea cough stomach cramps fever	1	1	0	0	0	0	0		36.8	44	.	Normal	0	1		1														None				None			1	0
1	1	22	F	Cough, vomit	1	0	1						35.9	40	.	Normal	0	1		1														None				None			0	0
1	1	23	F	Diarrhea, stomach cramp	1	1							36	.	.	Normal	0	0																None				None			1	1
1	1	10	M	Mouth ulcer and fever and decreased appetite	1	0	1						35.9	.	.	Normal	0	0																None				None			1	0
1	1	14	M	Eczema	0								x	.	.	Normal	0	0																None				None			1	1
1	1	37	M	Diarrhea, mouth sore, vomiting	1	1	1						37.5	.	.	Normal	0	0																None				None			0	1
1	1	30	F	Cough Fever	1	1							37.7	50	.	Normal	0	2		2														None				None			0	0
1	1	9	F	Cough fever	1	0	1						36.3	62	.	Normal	0	2		2														None				None			0	0
1	1	36	F	Fever cough	0								36.2	40	.	Normal	0	1		1														None				None			0	0
1	1	1	F	clouded nose stomach cramps	1	0	0	0	0	1			36.6	49	.	Normal	0	2																None				None			1	1
1	1	30	M	coughing	0								36	44	.	Normal	0	1		1														None				None			x	x
1	1	38	M	Headache	0								36.5	48	.	Normal		1		1														None				None			0	0
1	2	60	F	rash	0								35.5	.	.	Normal		0																None				None			0	0
1	2	60	M	stomach cramps	0								36.9	.	.	Normal		0																None				None			x	x
1	2	58	F	itchy rash	0								36	.	.	Normal		0																None				None			0	0
1	2	27	M	Cough and stomach ache	0								36.3	.	.	Normal		0																None				None			0	0
1	2	96	M	stomach ache	0								36.7	.	.	Normal		1																None				None			0	0
1	2	22	F	Rash and fever	0								37.8	.	.	Normal		1																None				None			0	0
1	2	6	M	Cough	0								36.7	.	.	Normal		0																None				None			0	0
1	2	12	M	blood in stool	0								36.5	.	.	Below		1			1				1									None				None			0	0
1	2	38	M	diarrhea	1		1						37.2	.	.	Below		1							1									None				None			0	0
1	2	22	M	boils and rash	0								39	.	.	Below		1							1									None				None			1	1
1	2	42	M	vomiting and poor appetite	0								36.3	41	.	Normal		0																None				None			0	0
1	2	30	F	Itching and fever	0								35.9	.	.	Normal		0																None				None			0	0
1	2	30	F	Eczema	0								36.1	.	.	Normal		0																None				None			x	x
1	2	107	F	fever, diarrhea	0								36.8	.	.	Normal		1																None				None			0	0
1	2	12	F	rash	0								35.3	.	.	Normal		0																None				None			1	1
1	2	15	M	Fever and cough	0								36.4	.	.	Normal		0																None				None			0	0
1	2	58	F	rash	0								35.5	.	.	Normal		0																None				None			x	x
1	2	84	M	scalp lesions	0								35.3	.	.	Normal		0																None				None			0	0
1	2	20	M	sores	0								36.4	.	.	Normal		0																None				None			x	x
1	2	64	F	warts and boil	0								36.6	.	.	Normal		0																None				None			1	0
1	2	13	M	rash and sores	0								35.4	.	.	Normal		0																None				None			0	1
1	2	66	M	coughing w/ asthma	0								35.2	.	.	Normal		1		1														None				None			x	x
1	2	33	M	diarrhea	0								36	.	.	Normal		0																None				None			x	x
1	2	1.5	M	cough	1					1			37	48	.	Normal		1		1														None				None			0	0
1	2	6	M	diarrhea	0								36.2	.	.	Normal		1																None				None			1	1
1	2	5	M	hiccups	0								36.4	40	.	Normal		0																None				None			1	1
1	2	6	F	ear pain and reslessness	0								36.8	.	.	Normal		1						1										None				None			0	0
1	2	17	M	crying when touching penis	0								36	.	.	Normal		0																None				None			x	x
1	2		F	Vomiting	1		1				1		36.2	.	.	Below		2			2				2									None				None			0	0
1	2	0.5	F	Rash on face	1					1			36.9	.	.	Normal		1										1						None				None			0	0
1	2	96	M	Sores on mouth	0								36	.	.	Normal		1																None				None			0	0
1	2	61	M	rash on back	0								36	.	.	Normal		0																None				None			1	0
1	2	27	M	Coughing	0								35.9	.	.	Normal		0																None				None			0	0
1	2	100	M	Ringworm on scalp	0								35.8	.	.	Normal		0																None				None			1	1
1	2	25	M	scatte2 dots on arms	0								35.5	.	.	Normal		0																None				None			0	0
1	2	25	M	coughing and poor appetite	0								36.7	36	.	Normal		1		1														None				None			0	0
1	2	69	M	ear discharge and rash	0								36.3	.	.	Normal		1						1										None				None			0	0
1	2	8	M	diarrhea vomiting and coughing	0								37.1	.	.	Below		1							1									None				None			0	0
1	2	11	M	ear pain and nasal discharge	0								37	.	.	Normal		1						1										None				None			0	0
1	2	54	M	difficulty swallowing	0								36.5	.	.	Normal		1						1										None				None			0	0
1	2	8	F	cough and wheeze	0								36.1	.	.	Normal		1																None				None			x	x
1	2	72	F	Eye drainage	0								37.1	.	.	Normal		0																None				None			0	0
1	2	6	M	diarrhea and vomiting	0								36.3	.	.	Normal		1																None				None			0	0
1	2	42	F	Painful sores on thighs	0								36.5	.	.	Normal		0																None				None			1	1
1	2	93	F	rash	0								35.6	.	.	Normal		0																None				None			1	1
1	2	8	M	rash on neck	0								35.8	.	.	Below		1							1									None				None			0	0
1	2	14	F	cough and fever	0								36.3	.	.	Normal		0																None				None			1	1
1	2	6	F	cough and rash	0								36.6	36	.	Normal		0																None				None			0	0
1	2	2.5	F	blood in stool	0								36.5	.	.	Normal		1			2													None				None			0	0
1	2	8	M	vomiting	0								36.1	.	.	Below		1							1									None				None			x	x
1	3	48	M	rash on legs	0								36.3	.	.	Normal		0																None				None			0	0
1	3	45	M	Cough and not eating	1	1							36.7	50	.	Normal		1		1														None				None			0	0
1	3	5	F	eczema	0								36.2	.	.	Normal		0																None				None			1	1
1	3	52	F	difficulty breathing and coughing	1		1						36.2	62	.	Below		1		1					1									None				None			0	0
1	3	7	M	Diarrhea and vomiting	0								36	36	.	Below		0																None				None			0	0
1	3	7	M	cough and vomiting	0								35.6	.	.	Normal		0																None				None			0	0
1	3	60	M	sores on hand	0								36.2	20	.	Normal		0																None				None			0	0
1	3	41	F	sores on face	0								36.3	.	.	Normal		0																None				None			0	0
1	3	14	M	cough and skin rash	0								36.4	42	.	Normal		1		1														None				None			1	1
1	3	22	M	stomach ache fever and ear sores	0								36.5	.	.	Normal		0																None				None			x	x
1	3	15	F	cough and fever	0								37	46	.	Normal		0																None				None			0	0
1	3	4	M	Fever and cough	0								36.2	50	.	Normal		1		1														None				None			0	0
1	3	24	M	cough and diarrhea	1	1							35.4	36	.	Normal		1			1													None				None			0	0
1	3	47	M	loose stool vomiting no appetite	0								36.5	.	.	Normal		0																None				None			0	0
1	3	49	F	vomiting and poor appetite	1	1	1						36.3	.	.	Normal		1			1													None				None			1	1
1	3	15	F	cough and clogged nose	0								36.2	.	.	Normal		0																None				None			1	1
1	3	19	M	runny nose and diarrhea	0								36	.	.	Normal		1																None				None			0	0
1	3	42	F	Diarrhea and skin rash	0								36	.	.	Normal		1																Urgent			Closed fracture	Priority		Pain/trauma	1	0
1	3	19	M	diarrhea and cough	0								35	32	.	Normal		0																None				None			x	x
1	3	17	M	skin rash	0								36.1	.	.	Normal		0																None				None			x	x
1	3	15	F	vomiting	1		1						35.7	.	.	Normal		1							1									None				None			0	0
1	3	10	F	ear discharge	0								35.9	.	.	Normal		1						1										None				None			0	0
1	3	132	F	wheezing	1							1	36.3	.	.	Normal		.																None				None			1	0
1	3	4	M	sores on chin	0								35.9	.	.	Normal		0																None				None			0	1
1	3	9	M	flu	0											Normal		0																None				None			1	0
1	3	57	M	cough	0								35	.	.	Normal		0																None				None			0	0
1	3	18	F	wheeze and difficulty breathing	1							1	36.4	.	.	Normal		1		1														None				None			0	0
1	3	16	F	cough and sores	0								36.3	.	.	Normal		0																None				None			0	0
1	3	51	F	sores on legs	0								35.9	.	.	Normal		0																None				None			0	0
1	3	1.5	F	cough	1					1			36.1	.	.	Normal		0																None				None			1	1
1	3	12	M	cough	0								36.2	52	.	Normal		1		1														None				None			x	x
1	3	12	M	cough	0								37.5	58	.	Normal		1		1														None				None			1	1
1	3	13	M	diarrhea and vomiting	1		1						36.5	.	.	Normal		1			1													None				None			0	0
1	3	72	F	rash on hand	0								36.1	.	.	Normal		.																None				None			x	x
1	3	72	M	skin rash	0								36.4	20	.	Normal		.																None				None			1	0
1	3	18	M	diarrhea, cough and vomiting	1		1						36.3	42	.	Normal		2		1														None				None			1	0
1	3	31	F	runny tummy	0								36.1	.	.	Normal		0																None				None			1	1
1	3	57	M	cough	0								35	36	.	Normal		0																None				None			1	0
1	3	48	M	sores on legs	0								35.9	.	.	Normal		0																None				None			0	1
1	3	1.5	M	cough	1					1			36.9	61	.	Normal		2										2						None				None			0	0
1	4	12	M	vomiting and poor appetite	1	1	1						37.1	.	.	Normal		2	2															None				None			0	0
1	4	28	M	cough and rash	0								36	40	.	Normal		1		1														None				None			0	0
1	4	17	M	vomiting and blood in stool	1	1	1						37.6	.	.	Normal		2	2		1													None				None			0	0
1	4	9	F	diarrhea and loss of appetite	0								36.9	.	.	Below		1			1				1									None				None			0	0
1	4	10	F	vomiting and diarrhea	1	1	1						35.9	.	.	Normal		2	2															None				None			0	0
1	4	34	M	epistaxis	0								36.5	.	.	Normal		0																None				None			x	x
1	4	59	F	itchy rash	0								36.6	.	.	Normal		0																None				Priority		Referral	x	x
1	4	13	M	cough light chest skin rash	1	1							36.7	.	.	Normal		1		1														None				None			1	1
1	4	24	F	cough vomit fever	1		1						36.9	.	.	Normal		1		1														None				None			1	1
1	4	36	F	loss of appetite fever rash	0								36.7	30	.	Normal		0																None				None			0	0
1	4	96	M	rash	0								36.8	.	.	Normal		.																None				None			x	x
1	4	113	F	abscess on forehead	0								35	.	.	Normal		.																None				None			1	0
1	4	12	F	runny tummy vomits fever	0								36.1	38	.	Normal		0																None				None			1	1
1	4	22	F	sores	0								37	.	.	Normal		0																None				None			1	0
1	4	19	F	sore on lip	0								36	.	.	Normal		0																None				None			0	0
1	4	3	F	vomitted and stain on diaper	0								36.6	.	.	Normal		0																None				None			1	0
1	4	15	F	vomiting and loose stools	0								36.8	30	.	Normal		0																None				None			1	0
1	4	21	F	blocked nose and cough	0								36.3	35	.	Normal		0																None				None			1	0
1	4	32	M	rash and sores	0								36	.	.	Normal		0																None				None			1	0
1	4	49	F	ringworm	0								36.3	.	.	Normal		0																Urgent			Closed fracture	None		Pain/trauma	2	0
1	4	72	M	rash on face	0								37.6	.	.	Normal		0																None				None			1	0
1	4	11	F	cough and ring worm	0								37	56	.	Normal		1																None				None			1	0
1	4	36	F	small warts on lips	0								35	.	.	Normal		0																None				None			0	0
1	4	60	M	facial warts	0								36.5	.	.	Normal		0																None				None			1	0
1	4	72	F	rash, eczema	0								36.4	.	.	Normal		0																None				None			1	0
1	4	60	M	sores on the scalp	0								36.4	.	.	Normal		0																None				None			1	0
1	4	12	F	itchy neck	0								37	.	.	Normal		0																None				None			1	1
1	4	23	M	fever, cough	0								36.4	44	.	Normal		1		1														None				None			x	x
1	4	3	M	blocked nose cough runny tummy	1	1							37	60	.	Normal		1		1														None				None			x	x
1	4	11	M	runny tummy	0								37	.	.	Normal		0																None				None			1	0
1	4	14	M	cough and fever	0								38	.	.	Normal		1		1														None				None			0
1	4	64	F	sore on face	0								35.6	.	.	Normal		0																None				None			1	0
1	4	15	M	dry skin	0								36.2	.	.	Normal		0																None				None			x	x
1	4	52	F	coughing	0								36.6	40	.	Normal		1		1														None				None			x	x
1	4	60	M	arm sore	0								36.6	.	.	Normal		0																None				None			2	0
1	4	8	F	rash and fever	0								36.3	.	.	Normal		0																None				None			1	0
1	4	48	M	cough loss of appetite	0								36.5	36	.	Normal		0																None				None			1	0
1	4	76	M	headache, sore throat	0								38.3	.	.	Normal		.																None				None			x	x
1	4	18	F	mouth ulcer	0								37.3	.	.	Normal		0																None				None			1	0
1	4	9	M	diarrhea and vomiting	0								37	.	.	Normal		0																None				None			1	0
1	4	39	F	wheals on face and body	0								36	.	.	Normal		0																None				None			1	0
1	4	10	M	cough and diarrhea	0								36.5	52	.	Normal		1																None				None			0	0
1	4	4	M	rash	0								36.7	.	.	Normal		0																None				None			0	0
1	4	5	F	fever and blocked nose	0								36.4	.	.	Normal		0																None				None			0	0
1	4	9	F	fever, loss of appetite, diarrhea	0								36.9	.	.	Below		1			1				1									None				None			x	x
1	4	26	M	vomiting, loss of appetite	1		1						36.7	40	.	Below		2	2	1					1									None				None			1	1
1	4	144	M	headache	0								38	.	.	Normal		.																None				None			0	0
1	4	11	M	swollen gum diarrhea fever	0								36	.	.	Normal		0																None				None			0	0
1	4	9	M	rash loss of appetite	0								36.5	.	.	Normal		0																None				None			0	0
1	4	12	F	runny tummy	0								37	30	.	Normal		1						1										None				None			1	0
1	4	59	M	cough	0								36	30	.	Normal		0																None				None			1	0
1	4	33	M	cough	0								36.1	46	.	Normal		1		1														None				None			1	0
1	4	57	F	swollen right eye	0								36.3	.	.	Normal		0																None				None			0	0
1	4	48	M	loss of appetite cough	0								36.6	28	.	Normal		0																None				None			x	x
1	4	25	F	cough runny nose swelling eye	0								36.3	30	.	Normal		0																None				None			1	1
1	4	35	F	tight chest and cough	1	1							36.9	49	.	Normal		1		1														None				None			1	1
1	4	41	F	fit yesterday evening	1			1					38.5	.	.	Normal		2	2															None				None			1	1
1	4	11	M	vomiting and rash	0								35.9	.	.	Normal		0																None				None			0	0
1	4	13	F	cough, vomit and blocked nose	0								36.9	35	.	Normal		0																None				None			1	1
1	4	24	M	swelling face	0								35.9	.	.	Normal		0																None				None			0	0
1	4	51	F	tonsillitis, rash, mouth ulcers	0								36.6	.	.	Normal		0																None				None			x	x
1	4	25	M	mouth ulcers and fever	0								36.9	.	.	Normal		0																None				None			1	0
1	4	31	F	itchy eyes, cough, runny tummy	0								37	.	.	Normal		1						1										None				None			x	x
1	4	22	M	Vomiting and loss of appetite	0								36.9	.	.	Normal		0																None				None			0	0
1	4	99	F	vaginal bleeding	0								x	.	.	Normal		.																None				None			0	0
1	4	31	F	cough, ring worm, loss of appetite	0								36.7	.	.	Normal		0																None				None			0	0
1	4	8	M	eye discharge	0								36	.	.	Normal		0																None				None			0	0
1	4	65	M	tight chest cough runny nose	0								37.6	.	.	Normal		.																None				None			0	0
1	4	13	M	diarrhea and rash	0								36.6	.	.	Normal		0																None				None			0	0
1	4	6	M	cough, feeling hot	0								35.9	.	.	Normal		0																None				None			0	0
1	4	45	F	ringworm and rash	0								37	.	.	Normal		0																None				None			0	0
1	4	44	F	vaginal wart	0								36	.	.	Normal		0																None				None			0	0
1	4	114	M	tight chest, not eating	1	1							36.9	.	.	Normal		1		1														None				None			1	0
1	4	x	M	runny tummy	0								35.9	.	.	Normal		0																None				None			1	1
1	4	52	M	ring worm and sore stomach	0								37	.	.	Normal		0																None				None			0	0
1	4	15	F	cough, sneeze, pyrexia	0								36.9	.	.	Normal		1		1														None				None			1	1
1	4	96	M	rash	0								37	.	.	Normal		0																Urgent			Respiratory Distress	Priority		Respiratory distress	2	2
1	4	35	M	tight chest and cough	1	1							36.9	.	.	Normal		1		1														None				None			0	0
1	4	25	M	runny tummy	0								36.7	.	.	Normal		0																Urgent			Respiratory Distress	Priority		Respiratory distress	2	2
1	4	72	F	weak and diarrhea	1				1				36	.	.	Below		2	2						1									None				None			1	0
1	4	120	M	operative check	0								37.5	.	.	Normal		.																None				None			0	0
1	4	7	F	tight chest	1	1							36.9	.	.	Normal		2		2														None				None			0	0
1	4	14	M	cough and mouth ulcer	0								36.2	.	.	Normal		0																None				None			0	1
1	4	8	M	pyrexia and cough	0								35.4	50	.	Normal		1		1														None				None			0	0
1	5	9	F	vomiting and diarrhea	0								35.9	.	.	Normal		0																None				None			0	1
1	5	108	M	sore throat	0								37	.	.	Normal		.																None				None			0	0
1	5	48	F	sore throat	0								35.9	.	.	Normal		0																None				None			0	0
1	5	88	F	sticky eyes	0								36	.	.	Normal		.																None				None			x	x
1	5	42	F	oral thrush, fever	0								35.9	.	.	Normal		1																None				None			0	0
1	5	6	F	oral thrush, mouth ulcer	0								36.5	.	.	Normal		0							1									None				None			1	1
1	5	72	M	rash on body	0								36	.	.	Normal		.																None				None			x	x
1	5	84	F	boil on buttocks	0								36.3	.	.	Normal		.																None				None			x	x
1	5	49	F	ear ache, discharge, diarrhea	0								36.7	.	.	Normal		1						1										None				None			x	x
1	5	29	M	cough, fever	0								36.6	.	.	Normal		1		1														None				None			1	1
1	5	33	M	skin rash	0								36.2	.	.	Normal		0																None				None			1	1
1	5	96	F	rash on body	0								36	.	.	Normal		.																None				None			0	0
1	5	57	M	septic sores on scalp	0								36	.	.	Normal		0																None				None			0	0
1	5	35	M	diarrhea	0								36	.	.	Normal		1																None				None			0	0
1	5	40	M	rash, cough	0								42	.	.	Normal		0																None				None			0	0
1	5	9	M	vomiting after feeds	1		1						36.5	.	.	Normal		1																None				None			0	0
1	5	12	M	ear discharge	0								36.4	.	.	Normal		1						1		1								None				None			0	0
1	5	11	M	abdominal cramp, diarrhea	0								36.6	.	.	Normal		0																None				None			1	1
1	5	21	M	cough, poor appetite	0								35.9	38	.	Normal		0																None				None			0	0
1	5	120	F	ring worm on R finger	0								36	.	.	Normal		0																None				None			0	0
1	5	120	F	rash on neck and body	0								36.1	.	.	Normal		0																None				None			0	0
1	5	51	F	vomiting after meals	1		1						36	.	.	Normal		1			1													None				None			1	1
1	6	0.75	F	tight chest	1					1			36	62	.	Normal		2										2						None				None			0	0
1	6	30	F	diarrhea	1		1		1				36.6	.	.	Normal		0																None				None			0	0
1	6	3	M	not stooling	0								36.4	.	.	Normal		0																None				None			0	0
1	6	51	F	fever runny stomach	0								39.3	.	.	Normal		0																None				None			0	0
1	6	96	M	rash	0								36.7	.	.	Normal		.																None				None			0	0
1	6	46	F	rash	0								36.2	.	.	Normal		0																None				None			0	0
1	6	120	M	boil	0								35.7	.	.	Normal		0																None				None			0	0
1	6	60	F	tight chest	0								36.4	42	.	Normal		1		1														None				None			0	0
1	6	6	F	cough	0								36.1	52	.	Normal		1		1														None				None			0	0
1	6	96	F	cough	0								36.3	.	.	Normal		0																None				None			0	0
1	6	5	M	tight chest and cough	0								36.7	42	.	Normal		1		1														None				None			0	0
1	6	31	M	cough and sores	0								35.8	26	.	Normal		0																None				None			0	0
1	6	48	F	septic sores around body	0								36.2	.	.	Normal		0																None				None			0	0
1	6	108	F	headache and fever	0								35.1	.	.	Normal		.																None				None			1	1
1	6	64	M	rash and scabies	0								36.3	.	.	Normal		0																None				None			0	0
1	6	48	M	cough	0								36.2	44	.	Normal		1																None				None			0	0
1	6	120	M	inflammation of eye	0								36.6	.	.	Normal		0																None				None			0	0
1	6	60	M	sores on the hand	0								36	.	.	Normal		0																None				None			0	0
1	6	48	F	sores on the hand	0								35.1	.	.	Normal		0																None				None			0	0
1	6	12	F	runy stomach cough mouth sores	0								35.3	30	.	Normal		0																None				None			Yello	1
1	6	9	F	fever and flu	0								35.2	28	.	Normal		1						1										None				None			1	0
1	6	35	F	tight chest	1							1	37.2	48	.	Normal		2		1														None				None			2	2
1	6	84	F	boils on buttock	0								36.6	.	.	Normal		.																None				None			1	1
1	6	31	F	pimples in the mouth	0								36.2	.	.	Normal		0																None				None			1	1
1	6	31	F	cough and left eye pain	0								36.4	29	.	Normal		0																None				None			1	1
1	6	25	M	cough	0								36.5	30	.	Normal		0																None				None			1	1
1	6	66	M	vomiting	1	1	1		1				36.5	.	.	Normal		1																None				None			1	1
1	6	7	F	cough	0								36.1	.	.	Normal		1		1														None				None			1	1
1	6	110	F	cough	0								35.7	27	.	Normal		0																None				None			0	0
1	6	36	M	R shoulder pain	0								35.9	.	.	Normal		1																None				None			0	0
1	6	108	F	sore throat	0								36	.	.	Normal		.																None				None			0	0
1	6	84	F	rash	0								35.4	.	.	Normal		.																None				None			0	0
1	6	25	F	runny stomach	0								35.4	.	.	Normal		0																None				None			0	0
1	6	48	F	painful R ear	0								36	.	.	Normal		0																None				None			0	0
1	6	58	F	sore throat	0								37.1	.	.	Normal		1																None				None			1	1
1	6	14	F	sores	0								36.2	.	.	Normal		0																None				None			0	0
1	6	121	F	skin rash	0								36.4	.	.	Normal		0																None				None			0	0
1	6	60	F	rash	0								35.7	.	.	Normal		0																None				None			1	1
1	6	72	F	L ear pain	0								36.8	.	.	Normal		.						x										None				None			x	x
1	6	65	M	ear pain	0								37	.	.	Normal		1						1										None				None			x	x
1	6	96	F	mouth sores	0								36.9	.	.	Normal		.																None				None			0	0
1	6	108	F	runny stomach, cough	0								35.8	.	.	Normal		1																None				None			0	x
1	6	50	F	cough	0								36.2	42	.	Normal		1		1														None				None			0	0
1	7	15	F	diarrhea and vomit	1		1						36	.	.	Normal		1																None				None			0	0
1	7	14	M	diarrhea and vomiting	0								36.8	.	.	Normal		1																None				None			0	0
1	7	23	F	L ear pain	0								36.9	.	.	Normal		0						1										None				None			1	1
1	7	65	M	cough	0								36.3	.	.	Normal		0																None				None			0	0
1	7	1.75	M	eye discharge	0								36.8	.	.	Normal		0																None				None			x	x
1	7	144	F	sore throat	0								36.6	.	.	Normal		.																None				None			x	x
1	7	108	M	sores on back	0								36	.	.	Normal		.																None				None			1	1
1	7	19	F	cough and fever	0								36.5	.	.	Normal		0																None				None			1	1
1	7	144	M	rash on private parts	0								37	.	.	Normal		.																None				None			0	1
1	7	58	F	2 right eye	0								36.7	.	.	Normal		1																None				None			1	1
1	7	16	F	abdominal cramp	0								36	.	.	Normal		1																None				None			1	1
1	7	52	M	diarrhea	0								35.7	.	.	Normal		1																None				None			0	0
1	7	1.75	F	fever	0								37	.	.	Normal		0																None				None			0	0
1	7	15	F	diarrhea	0								36	.	.	Normal		1																None				None			0	0
1	7		F	rash	0								37.6	.	.	Normal		1																None				None			0	0
1	7		M	sore	0								37	.	.	Normal		1																None				None			x	x
1	7	24	M	loss of appetite cough	0								35.7	.	.	Normal		1																None				None			x	x
1	7	12	M	fell yesterday	0								36.3	.	.	Normal		0																None				None			0	1
1	7	48		vomiting	0								36.4	.	.	Normal		1																None				None			1	0
1	7	9	M	dry skin	0								36.3	.	.	Normal		1																None				None			0	0
1	7	8	F	rash	0								36.9	.	.	Normal		0																None				None			0	0
1	7	7	M	rash and fever	0								36.5	.	.	Normal		1																None				None			0	0
1	7	10	F	cough and fever	0								37.3	.	.	Normal		1																None				None			0	0
1	7	81	M	night sweats diarrhea	0								36.4	.	.	Normal		1																None				None			0	1
1	7	2	F	cough and fever	0								36.5	58	.	Normal		1		1														None				None			1	1
1	7	120	F	swollen L eye	0								36.8	.	.	Normal		.																None				None			0	0
1	7	132	F	cough	0								36.4	.	.	Normal		.																None				None			0	1
1	7	14	F	feverish	0								36.8	.	.	Normal		1																None				None			0	0
1	7	59	M	rash	0								36.2	.	.	Normal		0																None				None			0	0
1	7	17	F	cough and fever	0								37	30	.	Normal		1																None				None			0	0
1	7	108	F	sore throat	0								36	.	.	Normal		.																None				None			0	0
1	7	84	M	R ear pain	0								36.4	.	.	Normal		.																None				None			0	0
1	7	45	F	bloody nose	0								35.8	.	.	Normal		.																None				None			x	x
1	7	29	F	diarrhea, abd cramps	0								36	.	.	Normal		1																None				None			0	0
1	7	40	F	abd cramps, diarrhea, fever	0								37.7	.	.	Normal		1																None				None			x	x
1	7	108	F	sore throat and cough	0								35.9	.	.	Normal		.																None				None			0	1
1	7	1.5	F	abscess on BCG site	1					1			x	.	.	Normal		1																None				None			0	0
1	7	24	F	cough	0								35.6	30	.	Normal		1																None				None			0	0
1	7	59	M	cough	0								36.2	.	.	Normal		1																None				None			0	0
1	7	14	F	diarrhea	0								36	.	.	Normal		1																None				None			0	0
1	7	24	F	cough and clogged nose	0								35.2	30	.	Normal		0																None				None			0	0
1	7	42	M	abdominal cramp	0								35.5	.	.	Normal		0																None				None			x	x
1	7	4	M	diarrhea and fever	0								36.2	.	.	Normal		0																None				None			0	0
1	8	108	M	loose stools	0								36.6	.	.	Normal		.																None				None			0	0
1	8	26	F	sore throat	0								36.2	.	.	Normal		0																None				None			0	0
1	8	28	F	rash	0								36.5	.	.	Normal		0																None				None			0	0
1	8	64	F	rash	0								36	.	.	Normal		0																None				None			0	0
1	8	22	M	cough	0								36.5	.	.	Normal		1																None				None			0	1
1	8	30	F	stomach ache and poor appetite	0								36.2	.	.	Normal		1																None				None			0	0
1	8	36	F	blisters/sores	0								37	.	.	Normal		1																None				None			0	0
1	8	156	M	vomiting	1		1						36	.	.	Normal		1																None				None			0	1
1	8	9	M	diarrhea	1	1	1		1				36	.	.	Normal		1																None				None			0	0
1	8	17	F	eye itchiness	0								36	.	.	Normal		0																None				None			0	0
1	8	84	M	cough	0								36	36	.	Normal		.																None				None			1	1
1	8	57	M	coughing	0								36.8	42	.	Normal		1		1														None				None			0	0
1	8	7	F	rash	0								36.7	.	.	Normal		0																None				None			0	0
1	8	57	M	coughing	0								36.8	42	.	Normal		1		1														None				None			0	0
1	8	22	F	loose yes stool and cough	0								36.5	.	.	Normal		0																None				None			0	0
1	8	122	M	itchy eyes and discharge	0								37	.	.	Normal		.																None				None			0	0
1	8	18	F	vomiting everything	1	1	1				1		37.2	.	.	Normal		0																None				None			0	0
1	8	25	F	fever	0								37	.	.	Normal		1																None				None			0	0
1	8	72	M	sores	0								36.7	.	.	Normal		.																None				None			0	0
1	8	14	M	cough	0								36.6	.	.	Normal		0																None				None			0	0
1	9	25	M	Rash on body	0								36.6	.	.	Normal		0																None				None			0	0
1	9	22	F	rash on arms	0								x	.	.	Normal		0																None				None			0	0
1	9	3	F	cough	0								36.3	.	.	Normal		0																None				None			1	1
1	9	11	M	coughing	0								36.6	38	.	Normal		0																None				None			0	0
1	9	21	F	rash around eye	0								35.6	.	.	Normal		0																None				None			x	x
1	9	22	F	Fever	0								35.9	.	.	Normal		0																None				None			0	0
1	9	23	M	fever diarrhea and vomiting	0								36.1	.	.	Normal		0																None				None			1	1
1	9	23	M	cough and fever	1	1							37.9	60	.	Normal		2		1														None				None			0	0
1	9	16	F	coughing	0								36.5	.	.	Normal		0																None				None			0	0
1	9	7	F	fever and cough	0								36.5	50	.	Normal		1		1														None				None			0	0
1	9	6	M	coughing	0								36.8	45	.	Normal		0																None				None			0	0
1	9	2	M	coughing	0								36.5	52	.	Normal		1		1														None				None			0	0
1	9	1	M	trouble breathing	0								36.3	66	.	Normal		2										2						None				None			0	0
1	9	1	M	trouble breathing	0								36.3	84	.	Normal		2										2						None				None			0	0
1	9	19	M	coughing	1						1		36.8	30	.	Normal		1						1					1					None				None			1	1
1	9	24	M	coughing	0								x	.	.	Normal		0																None				None			0	0
1	9	39	M	fever	0								38.3	.	.	Normal		0						1										None				None			1	1
1	9	50	M	rash on body	0								36.4	.	.	Normal		0																None				None			x	x
1	9	19	M	coughing	0								35.6	30	.	Normal		0						1										None				None			0	0
1	10	16	M	Pimples on legs	0								35.2	.	.	Normal		0																None				None			0	0
1	10	57	F	itchy body rash	0								36.9	.	.	Normal		0																None				None			1	1
1	10	96	M	sore throat and body rash	0								36.5	.	.	Normal		.																None				None			0	0
1	10	108	F	cramp/stomach ache	1							1	36.3	.	.	Normal		.																None				None			0	0
1	10	8	F	diarrhea	1	1	1						35.9	.	.	Normal		1																None				None			0	1
1	10	36	F	coughing at night	0								36.4	.	.	Normal		0																None				None			1	1
1	10	45	F	fever, r ear discharge	0								39.5	.	.	Normal		1						1										None				None			x	x
1	10	84	M	no appetite headache and fever	0								35.7	.	.	Normal		.																None				None			1	1
1	10	96	M	tight chest	1							1	x	55	.	Normal		1																None				None			1	1
1	10	37	F	stomach pains and body rash	1		1						36.8	.	.	Normal		0																None				None			0	0
1	10	108	M	fever and sore throat	0								37.6	.	.	Normal		.																None				None			0	0
1	10	35	M	stomach ache and vomiting	1		1	1					37.3	.	.	Normal		0																None				None			0	0
1	10	63	M	body rash and no appetite	0								38.5	.	.	Normal		.																None				None			x	x
1	10	40	F	stomach ache, cough, fever	0								37.9	50	.	Normal		1		1														None				None			0	0
1	10	19	F	mouth ulcer no appetite	0								36.1	48	.	Normal		1		1														None				None			0	0
1	10	2	M	discharging eyes	0								35.4	.	.	Normal		0																None				None			0	0
1	10	8	M	body rash, no appetite, blocked nose	0								37.6	.	.	Normal		0																None				None			0	0
1	10	59	M	warts on face	0								x	.	.	Normal		0																None				None			1	1
1	10	4	F	cough	0								35	.	.	Normal		0																None				None			0	0
1	10	46	M	stomach pains and body rash	0								37	.	.	Normal		0																None				None			x	x
1	10	15	F	temperature and cough	0								39.8	.	.	Normal		1																None				None			0	0
1	10	72	M	sores and dry skin	0								37	.	.	Normal		0																None				None			0	0
1	10	66	F	sores on the head	0								36.2	.	.	Normal		0																None				None			x	x
1	10	23	F	temperature and nose bleed	0								36.7	.	.	Normal		0																None				None			0	0
1	10	12	F	blocked nose	0								36.5	.	.	Normal		0																None				None			x	x
1	10	34	M	abscess and fever	0								37.6	.	.	Normal		0																None				None			1	0
1	10	26	M	diarrhea, painful private parts	0								36.8	.	.	Normal		0																None				None			0	0
1	10	45	M	fell and sore forehead	0								36.9	.	.	Normal		0																None				None			0	0
1	10	26	M	sores on R ear	0								36.9	.	.	Normal		0																None				None			1	0
1	10	50	F	cough at night	0								36	.	.	Normal		0																None				None			0	0
1	10	7	F	difficulty breathing and cough	1							1	36.5	56	.	Normal		1		1														None				None			1	0
1	10	8	F	cough tight chest	0								36.7	44	.	Normal		0																None				None			1	1
1	10	27	F	sores, diarrhea	0								36.5	.	.	Normal		0																None				None			1	0
1	10	26	F	temperature vomited yesterday	0								36.3	.	.	Normal		0																None				None			0	0
1	10	72	F	stomach cramps	0								36.3	.	.	Normal		0																None				None			0	0
1	10	34	F	sores on both legs	0								36.6	.	.	Normal		0																None				None			0	0
1	10	5	M	cough	0								36.9	59	.	Normal		1		1														None				None			0	0
1	10	29	M	temperature foul smelling urine	0								37.4	.	.	Normal		0																None				None			0	0
1	10	65	F	rign worm on scalp	0								36.9	.	.	Normal		0																None				None			1	0
1	10	48	F	cough	0								35.5	23	.	Normal		0																None				None			0	0
1	11	43	F	sticky eyes in the morning	0								36.2	.	.	Normal		0																None				None			0	0
1	11	34	F	ring worm on scalp	0								x	.	.	Normal		0																None				None			0	0
1	11	7	F	coughing	0								35.9	54	.	Normal		1		1														None				None			1	1
1	11	50	M	vomiting	0								36.9	.	.	Normal		1																None				None			0	0
1	11	19	M	cough fever runny tummy	0								36.6	42	.	Below		1		1					1									None				None			1	0
1	11	19	F	vomiting	1		1						36.5	.	.	Below		1							1									None				None			1	0
1	11	6	F	fever and coughing	1	1	1						35.5	52	.	Normal		1		1														None				None			0	0
1	11	16	F	cough vomit fever	0								35	50	.	Normal		1		1														None				None			1	1
1	11	25	M	cough vomit fever	0								36.3	41	.	Normal		1		1														None				None			1	0
1	11	6	M	cough and cold	0								35.5	52	.	Normal		1		1														None				None			0	0
1	11	18	M	cough and blocked nose	0								36.1	45	.	Normal		1		1														None				None			0	0
1	11	30	M	sores in mouth	0								36	.	.	Normal		0																None				None			0	0
1	11	36	F	chicken pox	0								35	.	.	Normal		0																none				none			1	yellow
1	11	36	F	cough and cold	0								35	34	.	Normal		0																none				none			0	green
1	11	4	F	nappy rash	0								35.8	.	.	Normal		0																none				none			0	green
1	11	36	F	cough	0								36.5	20	.	Normal		0																none				none			0	green
1	11	12	M	vomiting	1		1						36.3	.	.	Normal		2						1										None				None			0	0
1	11	30	F	skin problem	0								36	.	.	Normal		0																none				none			1	yellow
1	11	13	M	feverish	0								36.9	.	.	Normal		1						1										none				none			0	none
1	11	37	M	rash on neck	0								36	.	.	Normal		0																none				none			0	none
1	11	9	F	left swollen eye	0								36.9	.	.	Normal		0																none				none			0	green
1	11	29	F	ear pain	0								36	.	.	Normal		1						1										none				none			0	none
1	11	108	M	sore throat and sores	0								35.2	.	.	Normal		.																none				none			0	none
1	11	120	F	cough and chest problem	1							1	36.3	30	.	Normal		1																None				None			1	1
1	11	84	M	cough and chest pain	0								37.1	37	.	Normal		.																none				none			.	n/a	No IMCI in chart- child over 5 years
1	11	13	F	fever and decreased appetite	0								36.9	.	.	Normal		0																none				none			.	n/a	No IMCI in chart- child over 5 years
1	11	72	M	white patches on scalp	0								x	.	.	Normal		0																									No IMCI in chart
1	11	120	M	wound dehiscence	1	1					1		38.5	.	.	Normal		.																None				None			0	0
1	12	60	F	cough	0								36	.	.	Normal		0																none				none			.	n/a	No IMCI in chart- child over 5 years
1	12	30	F	itchy rash and fever	0								36.2	.	.	Normal		0																urgent			respiratory distress	priority signs		respiratory distress	1	yellow
1	12	16	M	eye discharge and cough	0								36.7	.	.	Below		1							1									none				none			0	none
1	12	30	M	cough vomit and fever	0								36.1	.	.	Normal		0																none				none			0	none
1	12	108	F	itchy rash	0								36.2	.	.	Normal		.																none				none			.	n/a	No IMCI in chart- child over 5 years
1	12	120	M	cough ear pain and runny nose	0								36.5	.	.	Normal		.																none				none			.	n/a	No IMCI in chart- child over 5 years
1	12	19	F	diarrhea, vomiting, fever	1		1						37.3	29	.	Below		1			1				1									None				None			0	0
1	12	12	F	cough, ear pain	0								36.7	.	.	Below		1						1	1									none				none			0	none
1	12	26	M	fever, ear pain	0								36.7	36	.	Normal		1						1										none				none			.		No IMCI in chart- child over 5 years
1	12	35	F	diarrhea, blocked nose	0								35.5	.	.	Below		0							1									none				none			0
1	12	20	F	loss of appetite cough, ear pain	0								36.3	.	.	Below		1						1	1									none				none			0
1	12	22	F	cough and fever	0								39	43	.	Below		1		1					1									none				none			0
1	12	7	M	diarrhea	0								36.2	.	.	Normal		0																none				priority signs		high temperature
1	12	48	M	pain when passing urine	0								36.5	.	.	Normal		0																none				none			1
1	12	5	F	dandruff	0								36.8	.	.	Normal		0																none				priority signs		high temperature	1
1	12	48	M	sore throat, cough	0								36	.	.	Normal		0																none				none			0
1	12	72	F	vaginal discharge	0								35.8	.	.	Normal		.																none				none			0
1	12	72	M	white patches on scalp	0								36.5	.	.	Normal		.																none				none			0
1	12	14	F	cough	0								36.7	33	.	Normal		0							1									none				none			.		No IMCI in chart- child over 5 years
1	12	28	M	fever, cough, skin rash	0								38.5	30	.	Normal		1																none				none			0
1	12	38	F	cough, sores on head	0								36.2	.	.	Normal		0																none				none			0
1	12	8	M	cough	0								36.9	32	.	Normal		0																none				none			0
1	12	26	F	swollen right below ear	0								36.5	.	.	Normal		0																none				none			.		No IMCI in chart- child over 5 years
1	12	1	F	blocked nose	0								36.3	.	.	Normal		0																none				none			0
1	12	5	F	cough and tight chest	0								37.1	46	.	Normal		0		1														none				none			0
1	12	47	M	fever cough and sore throat	0								37.1	41	.	Normal		1		1				1										none				none			0
1	12	36	F	cough and rash	0								36.7	.	.	Normal		0																none				none			0
1	12	34	F	fever	0								36.3	.	.	Below		0							1									none				none			0
1	12	33	M	cough and diarrhea	0								37.1	30	.	Normal		0																none				none			0
1	12	7	F	cough and rash	0								35.4	36	.	Normal		0																none				none			.		No IMCI in chart- child over 5 years
1	12	4	M	eye discharge	0								36	.	.	Normal		0																urgent			respiratory distress	priority signs		respiratory distress	1
1	12	14	F	cough and vomit	0								36	.	.	Normal		0																none				none			.
1	12	37	F	coughing	0								37.9	.	.	Normal		0																none				priority signs		high temperature	0	green
1	12	84	M	coughing	0								36.7	.	.	Normal		.																none				none			.		No IMCI in chart- child over 5 years
1	12	36	F	cough	0								36.8	39	.	Normal		0																urgent			respiratory distress	priority signs		respiratory distress	1
1	12	131	F	sores on lower lips	0								36.2	.	.	Normal		.																none				none			0
1	12	37	F	fever and oral thrush	0								38.8	.	.	Below		0							1									none				none			1
1	12	36	M	ring worm	0								36.3	.	.	Normal		0																none				none			0
1	12	32	F	sore throat	0								36.3	.	.	Normal		0																urgent			respiratory distress	priority signs		respiratory distress	1
1	12	42	F	cough and fever	0								36.2	30	.	Normal		0																none				none			.		No IMCI in chart- child over 5 years
1	12	20	F	Cough	0								36.3	.	.	Normal		0																none				none			.		No IMCI in chart- child over 5 years
1	12	132	F	sores on legs	0								35.8	.	.	Normal		.																urgent			respiratory distress	priority signs		respiratory distress	1
1	12	13	F	Cough	0								36	.	.	Normal		0																none				none			0
1	12	42	F	cough and fever	0								38.4	39	.	Normal		0																urgent			respiratory distress	priority signs		respiratory distress	2
1	12	11	F	cough	0								36.7	30	.	Normal		0																none				none			.		No IMCI in chart- child over 5 years
1	12	9	M	cough	0								36.5	36	.	Normal		0																none				none			.		No IMCI in chart- child over 5 years
1	12	13	M	cough	0								36	36	.	Normal		0																none				none			0
1	12	30	M	diarrhea	0								36.2	.	.	Normal		0							1									none				none			1
1	12	17	M	skin rash	0								36	.	.	Normal		0																none				none			.		No IMCI in chart- child over 5 years
1	12	35	M	cough and rash	0								30	.	.	Normal		0																none				none			0
1	12	2	F	diarrhea	0					1			x	.	.	Normal		0																None				None			0	0
1	12	16	M	cough	0								36	.	.	Normal		0																none				none			0
1	12	48	M	ear pain	0								37.9	.	.	Normal		1						1										none				none			0
1	12	32	M	coughing	0								36.4	.	.	Normal		0																none				none			0
1	12	20	F	cough and loss of appetite	0								36.6	.	.	Normal		0																none				none			0
1	12	18	M	vomiting and diarrhea	0								36.6	.	.	Normal		0																none				none			.		No IMCI in chart- child over 5 years
1	12	12	M	cough and diarrhea	0								35.8	.	.	Normal		0																none				none			.		No IMCI in chart- child over 5 years
1	12	24	M	followup	0								36.2	.	.	Normal		0																none				none			1
1	12	9	M	cough and blocked nose	0								37.4	.	.	Normal		0																none				none			.		No IMCI in chart- child over 5 years
1	12	15	F	body sores	0								35.7	.	.	Normal		0																none				none			.		No IMCI in chart- child over 5 years
1	12	20	M	fever, diarrhea	0								36.4	33	.	Normal		0																none				none			0
1	12	5	F	diarrhea, cough	0								36	.	.	Normal		0																none				none			0
1	12	10	F	body rash, itch, loss of appetite	0								36.1	.	.	Normal		0																none				none			1
1	12	48	M	pain ear with discharge, fever, cough	0								35.4	.	.	Normal		1						1										none				none			0
1	12	120	M	tight chest	0								37.3	.	.	Normal		0																none				none			1
1	12	72	M	cough sore throat abdominal pain	0								35.3	.	.	Normal		.																none				none			.
1	12	50	F	sores on buttocks, body rash, fever	0								37.8	.	.	Normal		0																none				none			1
1	12	11	F	fever, vomiting, diarrhea	0								36.8	.	.	Normal		1			1			1										none				none			0
1	12	96	F	sore throat, ring worm	0								35.4	.	.	Normal		0																none				none			0
1	12	19	F	cough, loss of appetite	0								35.9	31	.	Normal		0																none				none			0
1	12	96	F	vomiting, diarrhea, abd pain ,and cough	0								35.8	.	.	Normal		0																none				none			0	yellow
1	12	108	F	body rash	0								36.1	.	.	Normal		0																none				none			0
1	12	16	M	abdominal pain and diarrhea	0								36	.	.	Normal		0																none				none			0
1	12	10	M	loss of appetite, fever, blocked nose	0								36	.	.	Normal		0																none				none			1
1	12	10	F	itchy skin	0								36.4	.	.	Normal		0																none				none			1
1	12	15	F	cough	0								37	30	.	Normal		1						1										none				none			0
1	12	72	M	cough and fever	0								36.4	.	.	Normal		.																none				none			0
1	12	27	F	cough	0								36.3	.	.	Normal		0																none				none			0		No IMCI in chart
1	12	11	F	cough and fever	0								37.6	.	.	Normal		0																none				none			1
1	12	20	F	cough	0								x	30	.	Normal		1							1									none				none			0
1	12	60	M	sore throat, cough, fever	0								36.4	.	.	Normal		0																none				none			0
1	12	4	F	fever, vomit cough, blocked nose, ear pain	0								36.4	.	.	Normal		1						1										none				none			.		No IMCI in chart- child over 5 years
1	12	84	F	right foot cut	0								36	.	.	Normal		.																none				none			0
1	12	14	M	cough, diarrhea, fever	0								36	.	.	Normal		1							1									none				none			.		No IMCI in chart- child over 5 years
1	12	24	M	loose stool, fever	0								36.2	.	.	Normal		0																none				none			.		No IMCI in chart- child over 5 years
1	12	96	M	itchy, rash, white patches	0								36.7	.	.	Normal		.																none				none			0
1	12	60	F	fever, itchy skin	0								36.9	.	.	Normal		0																none				none			0
1	12	6	M	fever, cough	0								36	30	.	Normal		0																none				none			.		No IMCI in chart- child over 5 years
1	12	34	M	dry skin	0								36.5	.	.	Normal		0																none				none			0
1	12	48	M	cough	0								36.6	.	.	Normal		0																none				none			0
1	12	28	F	cough and fever, and sores	0								36.1	.	.	Normal		1						1										none				none			1
1	12	96	M	itchy eyes, cough	0								36.4	.	.	Normal		0																none				none			1
1	12	84	F	abdominal pain, headache	0								x	.	.	Normal		.																none				none			0
1	12	2	M	cough	0								36.4	.	.	Normal		0																none				none			0
1	12	33	F	sore throat and abdominal pain	0								36.6	.	.	Normal		0																none				none			0
1	12	132	M	rash, loss of appetite	0								35.4	.	.	Normal		.																none				none			.		No IMCI in chart- child over 5 years
1	12	48	F	itchy skin	0								36.7	.	.	Normal		0																none				none			0
1	12	84	F	cough, tight chest, rash	0								36.5	.	.	Normal		.																none				none			0
1	13	4	M	cough and flu	1		1						36	44	.	Normal		1																None				None			0	0
1	13	8	M	cough, rash	1	1							36.9	53	.	Below		2		1					1									None				None			0	0
1	13	10	F	cough and flu	0								37.5	42	.	Normal		1																none				none			1
1	13	17	F	vomit and runny tummy	0								36.8	.	.	Normal		0																none				none			1
1	13	58	F	sores	0								36.5	.	.	Normal		0																none				none			.		No IMCI in chart- child over 5 years
1	13	58	F	fever, runny tummy, vomiting	0								39.2	.	.	Normal		1																none				none			.		No IMCI in chart- child over 5 years
1	13	14	M	mouth sores	0								36.6	.	.	Normal		0																none				none			0
1	13	22	F	vomits, poor appetite	0								37.5	.	.	Below		1							1									none				none			.		No IMCI in chart- child over 5 years
1	13	4	F	diarrhea, vomits, cough	0								36.7	52	.	Normal		1																none				none			0
1	13	16	M	cough, no appetite, hot	0								37	38	.	Normal		0																none				none			0
1	13	1.5	M	cough	1					1			38	64	.	Normal		2										2						None				None			1	1
1	13	36	M	cough, diarrhea	0								37.7	38	.	Normal		0																none				none			0
1	13	11	M	diarrhea, cough	0								36.8	36	.	Normal		0																none				none			0
1	13	19	F	diarrhea, loss of appetite, cough	0								36.7	.	.	Normal		0																none				none			.		No IMCI in chart- child over 5 years
1	13	18	F	cough	0								36.9	.	.	Normal		0																none				none			.		No IMCI in chart- child over 5 years
1	13	0.25	M	eye discharge and 2ness	1					1			37.1	.	.	Normal		2										2						None				None			1	1
1	13	10	F	itchy and 2 eyes	0								36.1	.	.	Normal		1																none				none			.
1	13	23	M	body rash loss of appetite nose bleed	0								35.7	.	.	Normal		0																none				none			0
1	13	18	F	fever cough and vomiting	0								37.6	.	.	Normal		0																none				none			.
1	13	41	M	diarrhea, pimple, cough	0								37	.	.	Normal		0																none				none			0
1	13	3	F	cough, fever, nose block	0								37.8	62	.	Normal		1																none				none			0
1	13	21	F	cough, no appetite, sores	0								36.3	.	.	Normal		0																none				none			.		No IMCI in chart- child over 5 years
1	13	18	F	cough, runny tummy	0								37.2	.	.	Normal		1																none				none			0
1	13	11	F	cough, L ear pain	0								36.8	44	.	Normal		1						1										none				none			1
1	13	20	M	cough, no appetite	0								36.9	38	.	Normal		1																none				none			.		No IMCI in chart- child over 5 years
1	13	16	F	cough, fever	1			1					38	.	.	Normal		2		1														None				None			x	x
1	13	1.75	F	coughing	1					1			38.1	64	.	Normal		2										2						None				None			x	x
1	13	0.25	M	eye discharge and 2ness	1					1	1		37.5	.	.	Normal		2										2						None				None			0	0
1	13	24	F	cough, itchy eyes, rash	0								36.4	38	.	Normal		0																none				none			0
1	13	3	M	swollen eyes	0								36.7	.	.	Normal		0																none				none			0
1	13	10	F	nose block, cough	0								36.9	.	.	Normal		0																none				none			0
2	1	54.1311	F	Cough	0								36.7	.	.	below	0	1		0	0	0	0				x							none				none			0
2	1	37.1475	F	Impetigo	0								36.5	.	.	.	0	0																none				none			1
2	1	17.541	M	Diarrhea	0								36.7	.	.	.	0	0		0	0	0												none				none			0		No IMCI in chart
2	1	27.7377	F	Skin rash	0								36.9	.	.	.	0	0																none				none			0
2	1	93.3115																.																									No IMCI in chart
2	1	61.4754																.																									No IMCI in chart
2	1	21.8689	F	coughing	0								36.9	.	.	below	0	1		1		0			0									none				none			0
2	1	8.98361	F	Rash	0								36.1	.	.	.	0	0																none				none			.
2	1	5.57377	F	Skin rash	0								37	.	.	normal	0	0																none				none			.		No IMCI in chart- child over 5 years
2	1	9.93443																.																									No IMCI in chart
2	1	8.19672																.																									No IMCI in chart
2	1	61.1148																.																									No IMCI in chart- child over 5 years
2	1	33.2459	M	Rash	0								37.2	.	.	normal	0	0				0												none				none			1
2	1	17.6393	F	Rash	0								36.2	.	.	.	0	0																none				none			.		No IMCI in chart- child over 5 years
2	1	8.42623	F	Rash	0								36.1	.	.	.	0	0																none				none			1
2	1	58.7869	F	Wart on face	0								36.1	.	.	.	0	.																none				none			0
2	1	139.344	F	headache and sore throat	0								38.5	.	.	.	0	.																none				none			0
2	1	16.7213	F	coughing and tight chest	0								36.9	.	.		0	.																none				none			0
2	1	87.1148	F	cought and itchy rash	0								36.8	.	80		0	.																none				none			0
2	1	3.37705	M										36.1	.	.	normal	0	0		0														none				none			0	green	No IMCI in chart
2	1	3.63934	M	cough	0								36.9	55	.	normal	0	1		1					0	0								none				none			0
2	1	53.6066	M	sores on head	0								36.6	.	.	normal	0	0							0									none				none			.		No IMCI in chart- child over 5 years
2	1	11.0164	F	oral thrush	0								36.9	.	.	normal	0	0							0	0								none				none			.		No IMCI in chart- child over 5 years
2	1	63.6066	F	Skin rash	0								35.6	.	.	.	0	.																none				none			0
2	1	5.34426	F	tight chest	1	1							37	68	55	normal	0	2		2		0			0	0								None				None			0	0
2	1	66.6885	M	Fall (injured lower Leg)	0								.	.	.	.	1	.																none				none			0
2	1	4.03279	M	coughing	0								36.4	32	.	.	0	0							0	0								none				none			1
2	2	64.9836	M	cought and ringworm on scalp	0								36.6	32	.	.	0	.																none				none			0
2	2	6.09836	F	hx of fever + rash	0								35.4	.	.	normal	0	0				0			0									none				none			.		No IMCI in chart- child over 5 years
2	2	58.2623	M	rash	0								36.1	.	.	normal	0	0							0									none				none			0
2	2	23.4754	M	passed a worm in the stool yesterday	0								36.6	.	.	normal	0	0							0									none				none			.		No IMCI in chart- child over 5 years
2	2	99.2131	F	headache, fever, & nausea	0								38	.	.	.	0	.																none				none			.		No IMCI in chart- child over 5 years
2	2	43.1148	M	ear discharge	0								35.1	.	.	normal	0	1						1	0									none				none			.		No IMCI in chart- child over 5 years
2	2	24.6885	F	fever + tearful reddish eyes + ear pain	0								38.7	.	.	normal	0	1				0		1	0	0								none				none			0
2	2	10.3607	M	cough and rash	0								36.5	38	.	normal	0	0		0					0	0								none				none			1
2	2	20.2295	M	nappy rash (diaper rash)	0								36.4	.	.	normal	0	0							0									none				priority sign		high temperature	0
2	2	7.77049	F	dry rough skin	0								36	.	.	normal	0	0							0									none				none			0		No IMCI in chart
2	2	67.2459	F	fever + painful swallowing	0								36.2	.	.	.	0	.																none				none			0
2	2	8.52459	F	baby crying + feels hot	0								36.7	.	.	normal	0	0				0			0									none				priority sign		high temperature	0		No IMCI in chart
2	2	2.62295	F	hx of fever + blocked nose	0								36.7	.	.	normal	0	0				0			0									none				none			0		No IMCI in chart
2	2	19.0164		sores on scalp	0								36	.	.	normal	0	0							0									none				none			.		No IMCI in chart- child over 5 years
2	2	115.049	F	stomach ache + rash on body	0								36.4	.	.	.	0	.																none				none			0
2	2	5.08197	M	blocked nose	0								36	.	.	normal	0	0							0									none				none			0
2	2	4.32787	F	rash	0								36.2	.	.	normal	0	0							0									none				none			0		No IMCI in chart
2	2	3.77049	F	coughing and blocked nose	0								36.2	32	.	normal	0	0		0					0									none				none			1
2	2	53.6393	F	sore throat and cough	0								36.3	28	.	normal	0	0		0		0			0									none				none			1
2	2	10.7869	M	crying and loss of appetitie	1	1							36.7	.	.	normal	0	0							0									None				None			0	0
2	2	18.459	M	coughing	0								36	28	.	normal	0	0		0					0									none				none			.		No IMCI in chart- child over 5 years
2	2	22	F	sores on quine? And bottocks	0								36.5	.	.	normal	0	0							0									none				none			.		No IMCI in chart- child over 5 years
2	2	115.869	F	ear discharge and abdominal cramps	0								36.4	.	.	.	0	.																none				none			.		No IMCI in chart- child over 5 years
2	2	30.1311	M	cough	0								36.5	46	.	normal	0	1		1					0									none				none			0
2	2	72.0328	F	dry itchy skin on the arm	0								.	.	.	.	0	.																none				none			.		No IMCI in chart- child over 5 years
2	2	23.3443	F	sores all over body	1		1						36	.	.	normal	0	0							0									None				None			1	1
2	2	7.86885	M	sores on head	0								38.2	.	.	normal	0	0				1												none				none			.		No IMCI in chart
2	2	59.2787	F	painful itchy eye	0								36.7	.	.	.	0	.																none				none			1
2	2	29.4426	M	cough + high temperature	1		1						37.6	42	.	normal	0	1		1		0			0									None				Priority		Some dehydration	1	1
2	2	16.8525	M	cough + fever	1			1					36	26	.	normal		0		0		0			0									None				None			0	0
2	2	37.541	M	fever + vomiting	1		1						37.5	.	.	normal	0	0				0			0									None				None			0	0
2	2	29.1148	M	cough	0								36.5	44	.	normal	0	1		1					0																		No IMCI in chart
2	2	7.54098	F	sticky eyes with discharge	0								36.2	.	.	normal	0	0																none				none			0
2	2	#VALUE!	F	ear discharge + rash that turns to sores	0								35.8	.	.	normal	0	1						1										none				none			1
2	2	41.1148	F	sore throat	0								37.5	.	.	normal	0	0				0												none				none			.		No IMCI in chart- child over 5 years
2	2	31.8361	F	cough + loss of appetite	0								35.4	43	.	normal	0	1		1														none				none			.		No IMCI in chart- child over 5 years
2	2	66.8197	M	cough + loss of appetite	0								36.8	35	.	normal	0	.																none				none			0
2	2	195.115	F	sore throat	0								36.9	.	.	.	0	.																none				none			1
2	2	4.22951	M	cough and rash	0								35.8	52	.	normal	0	1		1														none				none			.		No IMCI in chart- child over 5 years
2	2	9.04918	F	cough	0								36.2	38	.	normal	0	0		0														none				none			.		No IMCI in chart- child over 5 years
2	2	6.95082	F	cough	0								36.4	64	.	normal	0	0		2														none				none			0
2	2	87.082	F	rash on buttocks	0								36.3	.	.	.	0	.																none				none			1
2	2	133.049	F	sore on both legs	0								36.9	.	.	.	0	.																none				none			0
2	2	14.5246	F	rash on the head	0								36.7	.	.	normal	0	0																none				none			1
2	2	23.6066	M	cough	0								36.5	41	.	normal	0	1		1														none				none			0
2	2	72.2623	F	cough + fever	0								37.7	26	.	.	0	.																none				none			0
2	2	60.9836	F	cough, er pain, loss of appetitie	1		1						36	.	.	.	0	1																None				None			0	0
2	2	13.7377	F	cough + diarreha, fever and rash	0								36.8	36	.	normal	0	0		0	0	0												none				none			0
2	2	57.1803	M	fever + loss of appetitie	0								38.6	.	.	normal	0	0				0												none				none			0
2	2	6.09836	M	diarrhea	0								35.8	.	.	normal	0	0			0													none				none			.		No IMCI in chart- child over 5 years
2	2	3.86885	F	eczema + fever and cough	0								36.3	26	.	normal	0	0		0														none				none			1
2	2	34.2623	M	fever, rash, loss of appetitie	0								36	.	.	normal	0	0				0												none				none			.		No IMCI in chart- child over 5 years
2	3	24.2295	F	cough	1						1		37.1	4	.	normal	0	1		1		0												None				None			x	x
2	3	77.8033	F	hot, poor appetite	0								37.5	.	.	.	0	.																none				none			0
2	3	67.4754	M	no documented	0								.	.	.	.	0	.																none				none			0
2	3	0.819672	F	stick discharge in the eyes	0								36.3	52	.	normal	0	1										1						none				none			.		No IMCI in chart- child over 5 years
2	3	95.541	F	skin rash	0								36	.	.	.	0	.																none				none			1
2	3	61.541	M	cough	0								36	.	.	.	0	.																none				none			0
2	3	1.54098	F	cough	0								36.6	44	.	normal	0	0		0														none				none			0
2	3	13.082	M	vomiting	1	1	1						37		.	normal	0	1			0													None				None			x	x
2	3	31.1475	F	cough	0								36	33	.	normal	0	0		0														none				none			.		No IMCI in chart- child over 5 years
2	3	24.5574	F	cough	0								37	41	.	normal	0	1		1		0												none				none			0
2	3	52.0328	M	rash	0								36.2	.	.	normal	0	0																none				none			.		No IMCI in chart- child over 5 years
2	3	6.98361	M	cough	0								36.3	52	.	normal	0	1		1														none				none			0
2	3	110.623	F	sore on ear	0								36	.	.	.	0	.																none				none			0
2	3	54	F	cough, hot, bloody __, poor appetite	0								37.8	41	.	normal	0	1		1		0												none				none			0
2	3	2.91803	M	coughing	0								36	.	.	normal	0	0		0														none				none			1
2	3	10.5246	F	rash on the neck	0								36.5	.	.	normal	0	0																none				none			0
2	3	45.377	M	coughing	0								36.3	36	.	normal	0	0		0														none				none			0
2	3	18.6885	M	cough	0								36	42	.	normal	0	0		1														none				none			.		No IMCI in chart- child over 5 years
2	3	47.1803	M	cough	0								36.6	34	.	normal	0	0		0														none				none			.		No IMCI in chart- child over 5 years
2	3	43.0492	M	cough	1		1						36.7	5	.	normal	0	1		1														None				None			0	0
2	3	48.4262	F	coughing	1		1						36	32	.	normal	0	0		0														None				None			0	0
2	3	49.9016	M	coughing	0								36	34	.	normal	0	0		0														none				none			0
2	3	4.42623	M	tight chest, rash skin and face	0								36.3	53	.	normal	0	1		1														none				none			0
2	3	24.3934	M	runy nose, sores, ear discharge	0								35.4	.	.	normal	0	1						1										none				none			0
2	3	17.2131	F	blocked nose, fever	0								37	.	.	normal	0	0																none				none			0
2	3	48.6557	M	stomach cramps	0								36	.	.	normal	0	0																none				none			1
2	3	26.3279	M	dry skin	1		1						36.7	.	.	normal	0	0																None				None			0	0
2	3	6.85246	F	bloody diarrhea	0								36.7	.	.	.	0	0			0													none				none			1
2	3	39.1803	F	tight chest	0								36.4	42	.	normal	0	1		1														none				priority sign		high temperature	0
2	3	4.65574	M	cough and dry skin	0								37	46	.	normal	0	0		0														none				priority sign		high temperature	1
2	3	41.1803	F	diarrhea for 5 days	0								36.7	.	.	.	0	0			0													none				none			0
2	3	90.6557	M	tight chest and coughing	0								36.6	27	.	.	0	.																none				none			0
2	3	7.86885	F	cough	0								36.6	39	.	normal	0	0		0														none				none			0
2	3	82.2951	F	cough + fever	0								36.6	34	.	.	0	.																none				none			0
2	3	82.0656	M	sores on the head and legs; sores eith yellow crust	0								36.4	.	.	.	0	.																none				none			0
2	3	10.0328	M	diarrhea	1		1						37	.	.	normal	0	0			0													None				None			0	0
2	3	133.213	F	coughing; poor appetite; vomitting after feeding	1		1						35.4	34	.	.	0	.																None				None			0	0
2	3	52.0656	F	cough, fever, poor appetite, stomach ache	0								36	38	.	normal	0	0		0		0												none				none			0
2	3	55.7377	M	cough, loss of appetite and selling of the R eye	0								36.2	34	.	normal	0	0		0														none				none			.		No IMCI in chart- child over 5 years
2	3	96.2295	F	diarrhea	0								36	.	.	.	0	.																none				none			0
2	3	45.7377	F	runny tummy and pain	0								36.1	.	.	normal	0	0			0													none				none			0
2	3	26.8525	M	sores on legs	0								36.5	.	.	normal	0	0																none				none			0
2	3	14.5246	M	blocked nose, ear pain	0								36.4	.	.	normal	0	1						1										none				none			0
2	3	23.9344	M	cough + fever	0								37	42	.	normal	0	1		1		0												none				none			0
2	3	6.98361	M	cough + fever	0								36.4	4	.	normal	0	0		0														none				none			0
2	3	20.3279	M	itchy rash, poor appetite	0								36.8	.	.	normal	0	0																none				none			0
2	3	9.67213	M	itchy rash, poor appetite	0								.	.	.	normal	0	0																none				none			0
2	3	125.213	M	stomach ache, headache	0								36.4	.	.	.	0	.																none				none			.		No IMCI in chart- child over 5 years
2	3	47.5738	F	sores on the chin	0								36	.	.	normal	0	0																none				none			.		No IMCI in chart- child over 5 years
2	3	3.14754	F	itchy rash	0								36.2	.	.	normal	0	0																none				none			1
2	3	22.9836	M	ear discharge	0								36	.	.	normal	0	1						1										none				none			.		No IMCI in chart- child over 5 years
2	3	28.2623	F	vomiting	1		1				1		36.9	.	.	normal	0	0																None				None			0	0
2	3	3.57377	F	tight chest	0								37	54	.	normal	0	1		1														none				none			0
2	3	70.6885	F	cough, fever, + headache	0								38	.	.	.	0	.																none				none			0
2	3	102.262	F	painful bilateral ears + fever + itchy eyes	0								37.6	.	.	.	0	.																none				priority sign		high temperature	0
2	4	62.2623	F	Pt. called but "no response"- not present																																							No IMCI in chart
2	4	5.63934	M	mouth sores	0								36	.	.	above	0	0																none				none			0
2	4	104.066	F	headach	0								36.5	.	.	.	0	.																none				none			.		No IMCI in chart- child over 5 years
2	4	43.4098	F	sores whole body	0								36.5	.	.	normal	0	0																none				none			0		No IMCI in chart
2	4	9.86885	M	rash on face, blisters on legs and feet	0								36	.	.	normal	0	0																none				none			0		No IMCI in chart
2	4	14.0656	F	pealing rash on face and body	0								36.3	.	.	normal	0	0																none				none			1
2	4	8.55738	M	"when feed hears noice in the tummy + baby cries"	0								36.4	34	72	normal	0	0																none				none			0
2	4	113.77	F	itchy rash	0								36.5	.	.	.	0	.																none				none			.		No IMCI in chart- child over 5 years
2	4	103.279	M	sore throat	0								36.8	28	.	.	0	.																none				none			0
2	4	11.1803	M	vomiting this morning	1		1						36	.	.	normal	0	0			0													None				None			0	0
2	4	74.8525	F	high temperature + not eating+ headache	0								37.6	.	.	.	0	.																none				none			0
2	4	49.6721	F	headache, R eye discharge	0								38.2	.	.	normal	0	0				0												none				none			0
2	4	29.6393	F	loose stool, vomiting, rash on face. Nest syndrome; Pt has hx of epilepsy had seizure this morning	1		1	1					35.5	.	.	normal	0	0			0													None				None			0	0
2	4	68.2623	M	sores on head	0								36.2	.	.	.	0	.																									No IMCI in chart- child over 5 years
2	4	37.0492	F	stomach ache	0								37.3	.	.	normal	0	0																none				none			1
2	4	5.27869	M	rash on body	0								36.1	.	.	normal	0	0																none				none			0
2	4	77.377	M	sore on the bottocks	0								36	.	.	.	0	.																none				none			0
2	4	40	M	cough	0								36.2	38	.	normal	0	0		0														none				none			.		No IMCI in chart- child over 5 years
2	4	10.1639	M	high temperature and coughing	0								36.2	52	.	normal	0	1		1		0												none				none			.		No IMCI in chart- child over 5 years
2	4	140.656	F	vomiting two days ago+ diarrhea	0								36.5	.	.	.	0	.																none				none			0
2	4	1.47541	M	sticky L eye	0								35.6	.	.	normal	0	0										0						none				none			0
2	4	37.0164	M	rash and loss of appetite	0								36.2	.	.	normal	0	0																none				none			1
2	5	#VALUE!	F	tight chest and coughing	1		1						36.5	.	.	.	0	.																None				None			0	0
2	5	#VALUE!	M	wound + rash	0								36	.	.	normal	0	0																none				none			0
2	5	44.5246	F	stomach ache, itchy rash	0								36.7	3	.	normal	0	0		0														none				none			.		No IMCI in chart- child over 5 years
2	5	#VALUE!	M	cough + eye rash	0								36.8	42	.	normal	0	1		1		0												none				none			0
2	5	3.40984	M	skin problem	0								35.6	.	.	.	0	0																none				none			.		No IMCI in chart- child over 5 years
2	5	12.1639	F																																								No IMCI in chart
2	5	16.0984	F	mouth ulcers, stomach ache	0								36.9	.	.	normal	0	0																none				none			0		No IMCI in chart
2	5	4.59016	F	blocked noe, sneezing, blood tinted mucus	0								37	.	.	normal	0	0																none				none			0
2	5	66.1639	M	pyrexia, cough	0								36.7	.	.	.	0	.																none				none			.		No IMCI in chart- child over 5 years
2	5	60.7541	M	edema under the chin	0								.	.	.	.	0	.																none				none			.		No IMCI in chart- child over 5 years
2	5	57.4754	M	cough and tight chest	0								36.8	41	.	normal	0	1		1														none				none			1
2	5	99.4098	F	sore right foot	0								35.9	.	.	.	1	.																none				none			0
2	5	29.8689	F	cough and tight chest	0								36.7	41	.	normal	0	1		1														none				none			0
2	5	#VALUE!	F	diarrhea	0								34.6	.	.	normal	0	0			0													none				none			0		No IMCI in chart
2	5	#VALUE!	F	itchy ears	0								36	.	.	normal	0	0																none				none			1
2	5	5.5082	M	oral thrush	0								36	.	.	normal	0	0																none				none			.		No IMCI in chart- child over 5 years
2	5	16.0984	M	loss of appetite	0								37	.	.	normal	0	0																none				none			0
2	5	25.4098	M	los of appetite, diarrhea	0								36.7	.	.	normal	0	0			0													none				none			0
2	5	150.23	M	diarrhea for 4 days + cough	0								37.6	.	.	normal	0	.																none				none			1
2	5	142	M	lower abdominal pain	0								36.2	.	.	.	0	.																none				none			0
2	5	14.1639	M	abscess	0								37	.	.	normal	0	0																none				none			0
2	5	43.9016	F	stomach ache, cough, loss of appetite	0								37	.	.	normal	0	0		0		0												none				none			.		No IMCI in chart- child over 5 years
2	5	6.06557	M	cough + blocked nose	0								36.7	54	.	normal	0	1		1														none				none			0
2	5	12.1311	F	eczema	0								36.5	.	.	normal	0	0																none				none			0
2	5	81.6721	F	cough, loss of appetite	0								36.7	.	.	.	0	.																none				none			1
2	5	15.0492	F	diarrhea, blocked nose, pyrexia	0								36.2	.	.	normal	0	0			0	0												none				none			0
2	5	104	F	burn on stomach	0								.	.	.	.	0	.																none				none			1
2	5	114.492	F	eye problem	0								.	.	.	.	0	.																none				none			0
2	5	95.1148	M	cough, ringworm, loss of appetite	0								36.5	.	.	.	0	.																none				none			0		No IMCI in chart
2	5	#VALUE!	M	ear discharge	0								36.7	.	.	normal	0	0				0												none				none			0
2	5	29.377	F	cough	0								37.6	.	.	normal	0	1		1														none				none			.		No IMCI in chart- child over 5 years
2	5	20.7213	F	body pains + pyroxia	0								39.2	.	.	normal	0	0				0												none				none			.		No IMCI in chart- child over 5 years
2	5	48.4918	F	skin rash	0								.	.	.	.	0	0																none				none			1
2	5	18.5902	M	diarrhea, red eyes	0								36	.	.	normal	0	0			0													none				non			0		No IMCI in chart
2	5	31.9016	F	coughing and diarrhea	1	1	1						37.6	4	.	normal	0	2		1	0													None				None			1	1
2	5	19.5082	M	mouth ulcers	1	1							36.9	.	.	.	0	0																None				None			0	0
2	5	72.3279	M	pyrexia, nose bleeding	0								38.3	.	.	.	0	0				0												none				none			0
2	5	45.9016	F	vomiting	1		1						36.9	.	.	normal	0	0			0													None				None			0	0
2	5	17.4754	M	tight chest and coughing	1	1							36.2	41	.	normal	0	2		1														None				None			0	0
2	5	11.7049	M	pink eye	0								36.6	.	.	.	0	0																none				none			0		No IMCI in chart
2	5	21.1475	F	vomiting and diarrhea	1		1						36.4	.	.	normal	0	2	2		0													None				None			0	0
2	5	64.6557	M	coughing, headache, vomiting	0								36	34	71	.	0	.																none				none			0		No IMCI in chart
2	5	1.40984	M	coughing	0								.	48	.	.	0	0										0						none				none			0		No IMCI in chart
2	5	4.78689	F	diarrhea + vomiting	0								36.2	.	185	normal	0	0	2		0	0												none				none			1
2	5	7.60656	M	itchy ear, coughing	1		1						36.4	.	.	normal	0	0																None				None			0	0
2	5	11.0492		painful L leg after fall yesterday	0								36.5	.	.	.	1	0																none				none			1
2	5	110.754	F	vomiting, sore spliter	1		1						36.7	.	.	.	0	1																None				None			1	1
2	5	55.0492	M	vomitting + loss of appetite	1		1						36.6	.	.	normal	0	1			0	0												None				None			1	1
2	5	9.04918	M	chest problem	0								36.4	51	.	normal	0	1		1														none				none			0
2	5	4.2623	F	[can't read handwritting]	0								36.8	5	.	normal	0	1		1		0				0								none				none			.		No IMCI in chart- child over 5 years
2	5	95.541	M	cough, chest pains, wound around mouth	0								37.1	26	.	.	0	.																none				none			0
2	5	69.082	M	buring eye, coughing	0								37.6	.	.	.	0	.																none				none			.		No IMCI in chart- child over 5 years
2	5	87.4754	M	pyrexia, headache, diarrhea	0								37.4	.	.	.	0	.																none				none			0
2	5	18.3934	M	itchy rash on body	0								37.2	.	.	normal	0	0				0												none				none			.		No IMCI in chart- child over 5 years
2	5	95.541	F	coughing and worms	0								.	.	.	.	0	.																none				none			0		No IMCI in chart
2	5	56.0656	M	open cut due to previous absess	0								.	.	.	.	0	.																none				none			0
2	5	4.2623	F	blocked nose	0								36	5	.	normal	0	1		1		0												none				none			.		No IMCI in chart- child over 5 years
2	5	36.3934	M	[can't read handwritting]	0																													none				priority sign		high temp	0
2	5	53.4426	M	itchy rash on body	0								36	.	.	normal	0	0																none				none			0
2	5	17.9016	M	tight chest	1		1						37.5	4	.	normal	0	1		1														None				None			0	0
2	5	17.2787	M	tight chest, skin purpule on R eye	0								37	4	.	normal	0	1		1														none				priority sign		high temp	0
2	5	#VALUE!	F	sore on right ear, coughing	0								36.8	.	.	.	0	.																none				none			0
2	5	113.115	F	rash, pyrexia, coughing	0								37.5	.	.	.	0	.																none				none			0
2	5	13.2459	M	[can't read handwritting]	0								36.2	.	.	normal	0	0				0												none				none			0
2	5	8.2623	M	cough + blocked nose	0								36.4	52	.	normal	0	1		1														none				none			0
2	5	62.7541	F	swollen mass on L chin and painful sore on mouth, ringworm on face	0								.	.	.	.	0	.																none				priority sign		high temp	0
2	5	76.9836	F	cough, pyrexia, rash	0								38.4	.	.	.	0	.																none				none			0
2	6	15.8689	M	itchy eye	0								37.4	.	.	normal	0	0																none				none			0
2	6	4.59016	M	coughing	0								36	52	.	normal	0	1		1														none				none			1
2	6	34.0984	M	tonsilitis	0								37	.	.	normal	0	0				0												none				none			0
2	6	16.9836	F	coughing	0								36.6	51	.	normal	0	1		1														none				none			0
2	6	12.459	M	rash	0								37.4	.	.	normal	0	0																none				none			0
2	6	1.47541	M	cough and pink eye-- Pt. following up from yesterday	0								37	4	.	.	0	0										0	0					none				none			.		No IMCI in chart- child over 5 years
2	6	1.18033	M	cough	1	1				1			36.7	56	.	normal	0	2										0						None				None			1	1
2	6	2.13115	M	rash	0								36.1	.	.	normal	0	0																none				none			0
2	6	17.8689	F		0								36.7	3	.	normal	0	0		0														none				none			0
2	6	116.164	F	rash on hand	0								36.7	.	.	.	0	.																none				none			1
2	6	17.9672	M	coughing	0								36.5	43	.	normal	0	1		1														none				none			1
2	6	63.1148	M	[can't read handwritting]	0								36.7	.	.	.	0	.																none				none			0
2	6	12.9836	M	coughin	0								36.5	32	.	normal	0	0		0		0												none				none			0
2	6	10.1967	F	difficulty breathing	0								36	28	.	normal	0	0		0														none				none			0
2	6	72.8525	F	abdominal pain and diarrhea	0								36	.	.	.	0	.																none				none			0
2	6	3.2459	M	"flu"	0								.	58	.	normal	0	1		1														none				none			0
2	7	50.2951	M	rash on L shoulder	0								36	.	.	normal	0	0																none				none			1
2	7	9.70492	F	cough	0								37	44	.	normal	0	0		0														none				none			.		No IMCI in chart- child over 5 years
2	7	129.869	M	rash on private parts	0								36.5	.	.	.	0	.																none				none			0
2	7	9.57377	F	cough	0								36	28	.	normal	0	0		0														none				none			0
2	7	106.131	F	sore throat	0								36.7	.	.	.	0	.																none				none			1
2	7	11.082	F	skin rash + sore	0								36.2	.	.	normal	0	0																none				none			1
2	7	5.11475	M	boil on scalp	0								36.4	.	.	normal	0	0																none				none			.		No IMCI in chart- child over 5 years
2	7	10	M	rash on neck	0								36	.	.	normal	0	0																none				none			.		No IMCI in chart- child over 5 years
2	7	37.8033	M	cough	0								36	49	.	normal	0	1		1														none				none			.		No IMCI in chart- child over 5 years
2	7	9.96721	F	fever	0								36.1	.	.	normal	0	0				0												none				none			0
2	7	20.0656	M	rash	0								36	.	.	normal	0	0																none				none			0
2	7	105.377	F	discharge R ear	0								36.1	.	.	.	0	.																none				none			0
2	7	100.623	M	cough	0								36.9	.	.	.	0	.																none				none			0
2	7	4.29508	F	fever	0								36.9	.	.	normal	0	0				0												none				none			0		No IMCI in chart
2	7	24.2295	M	boil on the L side of toe	0								36	.	.	normal	0	0																none				none			0		No IMCI in chart
2	7	42.8197	F	lost appetite; oral rash	0								36	.	.	normal	0	0				0												none				none			.		No IMCI in chart- child over 5 years
2	7	14.6557	F	sores	0								.	.	.	normal	0	0																none				none			0		No IMCI in chart
2	7	3.08197	M	cough	0								36	52	.	normal	0	1		1														none				none			.		No IMCI in chart- child over 5 years
2	7	6.06557	M	cough runny nose, fever	0								36	54	.	normal	0	1		1		0												none				none			0		No IMCI in chart
2	7	55.7049	F	cough	0								38	.	.	normal	0	0				0												none				none			.		No IMCI in chart- child over 5 years
2	7	9.96721	F	cough + fever	0								38	5	.	normal	0	1		1		0												none				none			0		No IMCI in chart
2	7	5.04918	M	fever, vomiting	0								37	.	.	normal	0	0				0												none				none			0
2	7	19.6721	M	rash	0								36.1	.	.	normal	0	0																none				none			.		No IMCI in chart- child over 5 years
2	7	58.3934	F	rash, sore throat	0								37.2	.	.	normal	0	0																none				none			0
2	7	51.2459	M	rash	0								.	.	.	normal	0	0																none				none			1		No IMCI in chart
2	7	24	M	abdominal cramps	0								36.1	.	.	normal	0	0																none				none			.		No IMCI in chart- child over 5 years
2	7	22.6885	M	oral thrush, diarrhea	0								36.9	.	.	normal	0	0			0	0												none				none			.		No IMCI in chart- child over 5 years
2	7	77.0492	M	swollen + painful finger	0								.	.	.	.	0	.																none				none			0		No IMCI in chart
2	7	38.0656	M	[can't read handwritting]	0								36.9	.	.	normal	0	0																none				none			.		No IMCI in chart- child over 5 years
2	7	44.4918	M	? Fits	0								.	.	.	normal	0	0																none				none			0		No IMCI in chart
2	7	15.3115	M	fever	0								36.2	.	.	normal	0	0				0												none				none			0
2	7	32.1967	F	abdominal cramps	0								.	.	.	normal	0	0																none				none			0		No IMCI in chart
2	7	14.1967	F	itchy skin	0								36.9	.	.	normal	0	0																none				none			0		No IMCI in chart
2	7	43.5082	M	LOA or COA?	0								37.1	.	.	normal	0	0																none				none			0
2	7	20.3934	F	fever, cough, ringworm	1		1						36.3	29	.	normal	0	0		0		0												None				None			0	0
2	7	19.4754	M	rash	0								36.2	.	.	normal	0	0																none				none			1
2	7	49.9016	M	rash	0								36.5	.	.	normal	0	0																none				none			0
2	8	24.4918	M	vomiting, tummy sore, sores on body	1	1	1						37.4	.	.	normal	0	0			0													None				None			0	0
2	8	93.4754	F	rash on both arms and legs	0								36.6	.	.	.	0	.																none				none			0		No IMCI in chart
2	8	127.77	F	rash	0								36.6	.	.	.	0	.																none				none			0
2	8	7.7377	M	cough, wheezy chest	0								36	52	.	normal	0	1		1														none				none			1
2	8	75.1475	M	pain in bubic bone	0								36.9	.	.	.	0	.																none				none			0		No IMCI in chart
2	8	20.0656	M	sores on body	0								35.3	.	.	normal	0	0																none				none			0		No IMCI in chart- child over 5 years
2	8	27.5738	F	mouth ulcers + body rash	0								36.5	.	.	normal	0	0																none				none			0		No IMCI in chart
2	8	16.8525	M	vomiting + temp	0								38	.	.	.	0	0																none				none			0		No IMCI in chart- child over 5 years
2	8	7.86885	M	vomiting, coughing, blocked nose, facial rash	1		1						36.2	.	.	.	0	1																None				None			1	1
2	8	4.29508	M	diarrhea	0								36	.	.	normal	0	0			0													none				none			0
2	8	59.7705	M	[can't read handwritting]	0								36	.	.	.	0	.																none				none			0		No IMCI in chart
2	8	5.77049	F	vomiting, coughing	0								34.8	.	.	.	0	0																none				none			1
2	8	47.5738	M	coughing, not feeling well	0								34.8	.	.	.	0	0																none				none			0
2	8	20.1967	M	oral thrush + stomach cramps	0								36.6	.	.	normal	0	1				0		1										none				none			0		No IMCI in chart- child over 5 years
2	9	13.377	M	coughing, vomiting	1		1						37	36	.	below	0	0		0	0	0												None				None			0	0
2	9	40.4918	F	discharge from eye, burning	0								35.5	.	.	below	0	0																none				none			0		No IMCI in chart
2	9	3.93443	F	diarrhea, fever	1	1							37.5	6	.	normal	0	1		1	0	0												None				None			0	0
2	9	12.918	M	fever	1								37.5	.	.	normal	0	1				0												None				None			0	0
2	9	130.197	F	blocked ears, glands behind neck	0								36.6	.	.	.	0	.																none				none			1
2	9	12.0328	M	runny nose, fever, cough	0								35	32	.	normal	0	0		0		0		0										none				none			0
2	9	52.7869	F	cough sore throat	0								35.6	32	.	normal	0	0		0		0																			1	1
2	9	26.0656	F	cough, runny nose	0								35.6	28	.	normal	0	0		0																					2	2
2	9	137.18	M	[no clinical note in chart]	0																													None							1	1
2	9	13.0164	M	ear pain	0								35	.	.	below	0	1						1										Urgent			Vomiting	None			1	1
2	9	18.7541	F	rash	0								35.3	.	.	normal	0	0																Urgent			Diarrhea	None			1	1
2	9	37.4754	M	coughing	0								36.2	3	.	normal	0	0		0														None				None			1	1
2	9	121.148	F	cough	0								35	.	.	.	0	.																None				None			1	1
2	9	98.2295	M	abnormal white marks on the face	0								35.1	.	.	.	0	.																None				None			1	1
2	9	37.3443	M	coughing	0								36.1	.	.	normal	0	0		0														Urgent			Sunkey e1	Priority		Sunkey eyews without lethargy	2	2
2	9	15.377	M	runny nose, cough	0								35.6	3	.	normal	0	0		0														None				None			0	0
2	10	10	M	fever	0								36.6	64	.	normal	0	1		1														None				None			1	1
2	10	8.36066	F	vomiting + temp	0								36.3	.	.	normal	0	0			0													Urgent			Respiratory Distress	Priority		Respiratory distress	1	1
2	10	93.4098	M	vomiting + fever at home	0								36.4	.	.	.	0	.																Urgent			Respiratory Distress	Priority		Respiratory distress	1	1
2	10	33.7705	M	fever	0								37.5	24	.	normal	0	0		0		0												None				None			0	0
2	10	66.3607	F	abdominal pain, fever, cough	0								36.3	18	.	.	0	.																None				None			0	0
2	10	6.2623	F	vomiting since past 3 this morning	0								36.6	.	.	.	0	0			0													None				None			0	0
2	10	9.60656	F	runny nose	0								.	.	.	normal	0	0			0													Urgent			Respiratory Distress	Priority		Respiratory distress	2	2
2	10	76.3607	M	[can't read handwritting]	0								36.3	.	.	.	0	.																Urgent			Respiratory Distress	Priority		Respiratory distress	2	2
2	10	123.049	M	bleeding from R ear	0								.	.	.	.	0	.																None				None			0	0
2	10	4.88525	M	cough	0								36.4	6	.	normal	0	1		1														None				None			1	1
2	10	54.2623	F	fever @ night	0								36	.	.	normal	0	0				0												None				None			1	1
2	10	61.082	M	decreased appetite, weight, cough	0								36.5	28	.	normal	0	0		0		0												Urgent			some dehydration	None		Some dehydration	2	1
2	10	49.9016	F	eye pain; itchy eye, puffy/swollen	0								.	.	.	.	0	0																None				None			1	1
2	10	39.6393	F	ear problem	0								36	.	.	normal	0	1						1										Urgent			Respiratory Distress	Priority		Respiratory distress	1	1
2	10	117.738	F	vomiting + stomach ache	0								36	.	.	.	0	.																Urgent			Respiratory Distress	Priority		Respiratory distress	1	1
2	10	40.5574	M	fever @home	0								36.3	.	.	normal	0	0				0												Urgent			some dehydration	Priority		Some Dehydration	1	1
2	10	60.0328	M	cough	0								36.2	3	.	normal	0	0		0		0												Urgent			some dehydration	Priority		some dehydration	1	1
2	10	30.6885	M	cough + vomiting	0								35.8	26	.	normal	0	1		0				1										None				None			1	1
2	10	42.4262	M	fever, cough	0								35.5	.	.	normal	0	0		0	0	0												Urgent			Respiratory Distress	Priority		Respiratory Distress	x	x
2	10	9.5082	F	fever	0								36.3	.	.	normal	0	0				0												Urgent			Respiratory Distress	Priority		Respiratory Distress	1	1
2	10	118.459	M	cough [can't read handwriting]	0								35.7	2	.	.	0	.																None				None			0	0
2	10	43.9016	M	abdominal pain	0								36.9	.	.	normal	0	0																None				None			1	1
2	10	11.2131	F	coughing	1		1						37.2	4	.	normal	0	1		0		0		1										None				None			x	x
2	10	24.6557	F	rash on back	0								36.2	.	.	normal	0	0																None				None			1	1
2	10	12.8525	M	rash on cheek	0								36.3	.	.	normal	0	1						1										None				None			2	2
2	10	34	F	coughing	0								36.8	3	.	normal	0	0		0														Urgent			Vomiting	Priority			2	2
2	10	57.5738	F	ear pain	0								36	.	.	normal	0	1						1										Urgent			Vomiting	Priority			2	2
2	11	42.918	M	vomiting, sore throat, [can't read handwriting]	1		1						36.2	.	.	normal	0	0			0													None				None			0	0
2	11	49.3115	F	fever, sore throat	0								36.9	.	.	normal	0	0				0												Urgent			Vomiting	Priority			2	2
2	11	11.377	M	cut on chin after a fall yesterday	0								36.2	.	.	.	1	0																Urgent			Respiratory Distress	Priority		Respiratory distress	1	1
2	11	4.95082	F	coughing	0								36	.	.	normal	0	0		0														None				None			1	1
2	11	122.033	M	"pain when pissing"	0								.	.	.	.	0	.																Urgent			Vomiting	Priority		Vomiting	2	2
2	11	133.541	F	itchy eye, blocked nose, sneezing	0								.	.	.	.	0	.																None				None			1	1
2	11	13.6066	M	coughing	0								35.5	41	.	normal	0	1		1														None				None			2	2
2	11	36.7541	M	fever, cough, poor appetite	0								35.9	.	.	.	0	0		0														None				None			1	1
2	11	42.9836	F	fever	0								38	.	.	normal	0	0				0												Urgent			Some respiratory distress	Priority		Respiratory Distress	1	1
2	11	27.3115	M	fever, mouth ulcers, poor appetitie	0								37.4	.	.	.	0	0																Urgent			Lethargy	Priority		Lethargy	2	2
2	11	36.3607	M	mouth ulcers	0								37.1	.	.	.	0	0																None				None			2	2
2	11	27.3115	F	mouth ulcers	0								37.5	.	.	.	0	0																None				None			1	0
2	11	54.4262	F	coughing, fever	0								36.9	4	.	normal	0	1		1														Urgent			some dehydration	Priority		some dehydration	1	1
2	11	32.8852	F	coughing, vomiting, fever, poor appeptite	0								36.8	43	.	normal	0	1		1		0												Urgent			Respiratory Distress	Priority		Respiratory Distress	2	2
2	11	30.918	M	diarrhea, poor appetite, coughing	0								35.8	34	.	normal	0	0		0														None				None			0	0
2	11	83.3115	M	pain in vagina	0								36.3	.	.	.	0	.																None				None			1	1
2	11	36.3607	F	sores on [can't read handwriting	0								36.3	.	.	normal	0	0																None				None			0	0
2	11	67.0492	F	chicken pox on whole body	0								.	.	.	.	0	.																None				None			1	0
2	11	34.4918	M	lump on the cheek	0								.	.	.	normal	0	0														1		None				None			1	1
2	11	68.5574	F	itchy eyes [can't read handwriting]	0								.	.	.	.	0	.																None				None			x	x
2	11	13.6721	F	[can't read handwritting]	0								35.2	.	.	.	0	0																None				None			1	0
2	11	41.7705	F	sore on the head	0								35	.	.	normal	0	0																None				None			0	0
2	11	87.9016	M	rectal absess	0								.	.	.	.	0	.																None				None			1	1
2	11	21.9344	F	diarrhea	0								39	.	.	normal	0	0			0	0												None				None			1	1
2	11	16.1967	F	poor appetitie	0								36.2	.	.	normal	0	0		0														None				None			x	x
2	11	9.40984	M	fever, vomiting, diarrhea	0								39	.	.	normal	0	0				0												None				None			0	0
2	12	4.13115	F	cough and blocked nose	1	1	1						36.8	50	.	normal	0	1		1														None				None			0	0
2	12	24.8852	M	body rash	0								36	.	.	normal	0	0																Urgent			Respiratory Distress	Priority		Respiratory distress	x	x
2	12	9.18033	F	nappy rash	0								36	.	.	normal	0	0																None				None			0	0
2	12	18.0328	M	rash on body	0								36.7	.	.	normal	0	0																None				None			0	0
2	12	15.541	F	itchy rash	0								36.2	.	.	normal	0	0																None				None			1	1
2	12	149.967	M	sore throat, nose blocked, [can't read handwriting]									36	.	.	.	0	.																none				none			.		No IMCI in chart- child over 5 years
2	12	11.4098	F	rash on body, fever	0								38.1	.	.	normal	0	0				0												None				None			1	1
2	12	5.37705	M	follow up from 3 days ago(difficulty breathing)	0								36.2	40	.	normal	0	0		0														None				None			1	1
2	12	25.2459	M	cough, fever, vomiting, diarrhea	1	1	1						36.9	.	.	normal	0	0			0	0												None				None			0	0
2	12	30.3607	M	LOA, fever	0								36.1	24	.	normal	0	0		0		0												None				None			2	1
2	12	3.60656	M	cough, vomiting	1	1	1						35.6	56	.	normal	0	2		1														None				None			1	1
2	12	2.2623	F	cough, blocked nose	0								36.3	52	.	normal	0	1		1														None				None			x	x
2	12	11.5082	F	fever, runny nose	0								37.1	.	.	normal	0	0				0												Urgent			Pain	Priority		Referral	x	x
2	12	23.377	F	fever	0								36.9	.	.	normal	0	0				0												Urgent			some dehydration	Priority		Some Dehydration	1	1
2	12	5.44262	F	coughing	1		1						37	54	.	normal	0	2		1														None				None			0	0
2	12	12.0656	F	[can't read handwritting]	0								36.6	.	.	normal	0	0																None				None			0	0
2	12	94.5574	F	allergic reaction (rash on face, swollen face)	0								36.1	.	.	.	0	.																None				None			1	0
2	12	8.42623	M	runny tumy	0								36.6	.	.	normal	0	0			0													None				None			1	1
2	12	13.6721	F	fever, cough	0								35	32	.	normal	0	0		0		0												None				None			2	2
2	12	16.2623	F	stridor, follow up NSH	0								36.7	46	.	normal	0	1		1														None				None			2	2
2	12	14.7541	M	wheezing +++	0								36.4	50	.	normal	0	1		1														None				None			2	1
2	12	28.5902	F	fevers	0								37.1	.	.	normal	0	0				0												Priority			Respiratory Distress	Priority		Some respiratory distess	2	2
2	12	19.4426	M	coughing, [can't read handwriting]	0								36.4	30	.	normal	0	0		0														None				None			2	2
2	12	58.1967	M	itchy rash	0								36.5	.	.	normal	0	0																urgent			respiratory distress	priority signs		respiratory distress	2	red
2	12	33.0164	M	fever, cough	0								36.9	22	.	normal	0	0		0		0												none				none			0
2	12	34.7541	M	itchy eye	0								36.1	.	.	normal	0	0																none				none			0
2	12	33.0164	F	cough, fever, vomiting	1	1	1						36.9	42	.	normal	0	2	2	2	1	0												None				None			0	0
2	12	15.0492	F	cough body rash	0								36.5	42	.	normal	0	1		1														urgent			respiratory distress	priority signs		high temperature + respiratory distress	1
2	12	88.1311	M	rash around the ear	0								36.3	.	.	.	0	.																none				none			0
2	12	2.36066	F	"rille up" [can't read handwriting]	0								36.3	42	.	normal	0	0		0														none				none			0
2	12	19.0492	M	fever, coughing	0								36.4	26	.	normal	0	0		0														none				none			.		No IMCI in chart- child over 5 years
2	12	9.7377	F	fever, blocked nose, LOA	0								36.7	.	.	normal	0	1				0		1										none				none			1
2	12	4	F	cough	0								36.1	30	.	normal	0	1		0				1										none				none			0
2	12	65.4426	F	sore throat, [can't read handwriting]	0								.	.	.	.	0	.																none				none			1
2	12	106.328	M	itchy eyes, blocked nose	0								.	.	.	.	0	.																none				none			0
2	12	71.4426	M	headache, runny nose, [can't read handwriting]	0								36.6	.	.	.	0	.																none				none			0
2	12	20.8852	M	body rash, fever, oral thrush	0								36	.	.	normal	0	0				0												none				none			0
2	12	12	F	rash on body	0								.	.	.	normal	0	0																none				none			.		No IMCI in chart- child over 5 years
2	12	19.6393	M	cough	0								37	32	.	normal	0	0		0														none				none			0
2	13	32.6557	M	diarrhea	1	1							37	.	.	normal	0	0			0	0												None				None			1	1
2	13	134.033	M	pimple undet the armpit, hx of chronic illness (out of medications)	1				1				36	.	.	.	0	.																None				None			x	x
2	13	8.88525	F	[?] of appetite	1		1						36	.	.	normal	0	0																None				None			0	0
2	13	26.4262	M	0	0								.	.	.	normal	0	0																none				none			0
2	13	1.67213	M	rash and redness around nappy area	0								.	.	.	.	0	0																none				none			0
2	13	37.3443	M	headache	0								36.2	.	.	.	0	0																none				none			.		No IMCI in chart- child over 5 years
2	13	100.098	M	asthma attack	0								.	.	.	.	0	.																none				none			1
2	13	15.4754	M	swelling and redness in the occipital area	0								.	.	.	.	0	0																none				none			0		No IMCI in chart
2	13	60.8525	M	sores on face and chin	0								.	.	.	.	0	.																none				none			0
2	13	10.6885	M	enlarged lump on right armpit	0								35.9	.	.	.	0	0																none				none			1
2	13	62.1311	F	strange eyes, burning constantly and fall sometime	0								.	.	.	.	0	.																none				none			0
2	13	51.9344	F	rash over the knee	0								.	.	.	.	0	0																none				none			0
2	13	42.3607	M	fever last night	0								37	.	.	normal	0	0				0												none				none			.		No IMCI in chart- child over 5 years
2	13	66.9836	M	loss of appetite, itching in head	0								36.7	.	.	.	0	.																none				none			0
2	13	16.3279	F	LOA + cough	0								36.2	38	.	normal	0	0		0														none				none			1
2	13	20.8525	M	tight chest	0								.	.	.	.	0	1		1														none				none			0
2	13	117.377	F	frequency and poor bladder control	0								36.4	.	.	.	0	.																none				none			0
2	13	105.213	M	vomiting and loose stool	0								.	.	.	.	0	.																none				none			0
2	13	32.5902	M	sores on the arm	0								36.8	.	.	.	0	0																none				none			0		No IMCI in chart
2	13	64.6557	M	itchy [can't read] in the throat	0								36.3	.	.	.	0	.																none				none			0
2	13	13.9016	F	child fell yesterday morning from bed. Swelling on R part of the neck	0								.	.	.	.	1	0																none				none			1
2	13	81.1148	F	abdominal cramps	1	1	1						36.3	.	.	.	0	0																None				None			0	0
2	13	154.656	M	headache since morning	1		1						.	.	.	.	0	1																None				None			1	1
2	13	25.4426	M	runny tummy	0								35	35	.	normal	0	0		0	0													none				none			0
2	13	14.3934	M	rash on the buttocks	0								.	.	.	.	0	0																none				none			1
2	13	29.7049	M	blood in stool	1		1						36.9	.	.	normal	0	0			0													None				None			0	0
2	13	22.4262	M	fever	1			1					38.4	.	.	normal	0	0				0												None				None			1	1
2	13	14.4918	F	runny tummy, vomitting	1		1						36	.	.	below	0	0			0													None				None			0	0
2	13	13.9344	F	vomiting + 1 episode of fever	1		1	1					36.6	.	.	normal	0	0			0	0												None				None			0	0
2	13	10.0328	M	vomiting, rash on the body	1	1	1						37.4	.	.	normal	0	0				0												None				None			0	0
2	13	26.3934	F	vomiting	1		1						.	.	.	.	0	0																None				None			0	0
2	13	7.08197	F	rash on the body	0								36.5	.	.	.	0	0																none				none			0
2	13	26.2951	M	blood in the stool; black stool	0								36.6	.	.	below	0	0																none				none			1
2	13	15.2459	F	ear pain at night	0								.	.	.	normal	0	1				0		1										none				none			0
2	13	23.5082	F	fever, flu + cough	0								36.7	.	.	normal	0	0		0		0												none				none			1
2	13	30.4918	F	rash over face	0								36.4	.	.	.	0	0																none				none			1
2	13	15.6393	F	mouth sores	0								36.2	.	.	normal	0	0																urgent			dehydration + diarrhea	emergency signs	dehydration + diarrhea		2
2	13	20.7541	F	vomiting	1	1	1						36.5	.	.	normal	0	0																None				None			0	0
2	13	21.9016	M	vomiting	1	1	1						36	.	.	normal	0	0			0													None				None			0	0
2	13	20.0328	F	cough	0								36.7	44	.	normal	0	1		1														none				none			0
2	13	15.6393	M	rash very itchy at night	0								.	.	.	.	0	0																none				none			.		No IMCI in chart- child over 5 years
2	13	66.3279	M	ringworms	0								.	.	.	.	0	0																none				none			0
2	13	7.77049	M	painful L arm	0								.	.	.	.	0	0																none				none			0		No IMCI in chart
2	13	66.2623	M	crying when urinating for 1 day	0								.	.	.	.	0	0																none				none			.		No IMCI in chart- child over 5 years
2	13	10.3607	M	cough	0								37	29	.	normal	0	0		0														none				none			0
2	13	27.377	M	rash on the body, loss of appetite	0								36.9	.	.	.	0	0																none				priority sign		high temp	0
2	13	26.459	M	cough	0								36.9	4	.	below	0	1		1														none				none			0
2	13	6.09836	M	runny tummy	0								36.9	.	.	normal	0	0			0													none				none			0
2	13	100.295	F	rash over body	0								.	.	.	.	0	0																none				none			0
2	13	9.67213	F	itchy eyes	0								36.8	.	.	.	0	0																0				0			0		No IMCI in chart
2	13	12.8525	M	cough	0								35	72	.	below	0	1		1														none				none			0
2	13	32.5574	F	tight chest, ringworm	0								36	28	.	normal	0	0		0														none				none			0

## Sheet: Sensitivity Key
SCREN	AVPU	IMCI	SATs: Emergency	SATs: Very Urgent	SATs: Urgent	ETAT: Emergency	ETAT: Priority signs	Resources	SATS	ETAT
Yes	Alert	Red	None	None	None	None	None		Emergency	Emergency Signs
No	Voice	Yellow	Airway/Breathing	<2 mnths	Resp distress	Airway and Breathing	< 2months		Very-Urgent	Priority Signs
	Pain	Green	Circulation	Inconsolable	Dehydration + Diarrhea	Circulation	High temp		Urgent	Non-Urgent
	Unresponsive	None	Convulsions	more sleepy than normal	Unable to drink/feed	Coma	Trauma		None
			Dehydration	Poisoning/OD	Vomit everything	Convulsions	Pallor
			Coma	Focal Neuro	Malnutrition	Dehydration withDiarrhea	Poisoning
			Other	Burns >10%/circumfrential	Pedal oedema (both)		Pain
				Eye injury	Unwell + DM		Resp Distress
				Open fracture/limb threat	Burn <10%		Restless/lethargy
				Dislocation large joint	Closed fracture		Urgent Referral
					Dislocation small joint		Malnutrition
							Oedema
							Burns

## Sheet: Adherence Data
Clinic	Start Record Date	End Record Date	Last Submission Date	Survey Taker	Do_you_consent_to_being_asked_questions_that_I_will_record_	sick_visit	ask_sick_visit	Unable_to_Drink_or_Breastfeed.Is your child unable to drink or breastfeed?	Unable_to_Drink_or_Breastfeed.Were you asked by the Queue Marshall if your child is unable to drink or breastfeed	Vomiting_Everything.Is your child vomiting everything	Vomiting_Everything.Were you asked by the QM if your child is vomiting everything?	Convulsions_during_this_illness.Is your child having convulsions during this illness?	Convulsions_during_this_illness.Were you asked by the QM if your child is having convulsions during this illness?	Lethargic_or_Unconscious.Is the child lethargic or unconscious	Lethargic_or_Unconscious.Did the QM look at your baby to see if it is lethargic or unconscious	Less_than___months_of_age_.Is your child less than 2 months of age?	Less_than___months_of_age_.Were you asked by the QM the age of your child?	Seen_in_clinic_in_last___days_.Was your child seen in a hospital or clinic in the last 2 days?	Seen_in_clinic_in_last___days_.Were you asked by the QM if your child was seen in a hospital or clinic in the last 2 days?	Date
1	42040.3	42040.4	42044	Gillian	1	1	1	1	0	1	0	1	1	1	1	0	1	0	0	42040
1	42040.3	42040.3	42044	Gillian				0	0	0	0	0	0	0	0	0	0	0	0	42040
1	42040.4	42040.4	42044	Gillian	1	1	1	1	1	0	1	1	0	1	1	0	1	0	1	42040
1	42040.4	42040.4	42044	Gillian	1	1	1	1	1	1	1	0	0	0	1	0	0	0	0	42040
1	42040.4	42040.4	42044	Gillian	1	1	1	0	1	0	1	1	1	0	1	0	0	0	1	42040
1	42040.4	42040.4	42044	Gillian	1	1	1	0	1	0	1	1	0	0	1	0	1	0	0	42040
1	42040.4	42040.5	42044	Gillian	1	1	1	0	0	0	0	0	0	0	1	0	0	0	0	42040
1	42040.4	42040.4	42044	Gillian	1	0	1	0	0	0	0	0	0	0	0	0	0	0	0	42040
1	42040.4	42040.4	42044	Gillian	1	1	1	0	0	1	1	1	1	1	1	0	1	0	1	42040
1	42040.4	42040.4	42044	Gillian	1	0	1	0	0	0	0	0	0	0	0	0	0	0	0	42040
1	42040.4	42040.4	42044	Gillian	1	0	0	0	0	0	0	0	0	0	0	0	0	0	0	42040
1	42040.4	42040.4	42044	Gillian	1	0	1	0	0	0	0	0	0	0	0	0	0	0	0	42040
1	42040.4	42040.4	42044	Gillian	1	1	1	1	1	0	1	1	1	0	1	0	1	0	1	42040
1	42040.4	42040.4	42044	Gillian	1	0	1	0	0	0	0	0	0	0	0	0	0	0	0	42040
1	42040.4	42040.4	42044	Gillian	1	0	0	0	0	0	0	0	0	0	0	0	0	0	0	42040
1	42040.4	42040.4	42044	Gillian	1	0	0	0	0	0	0	0	0	0	0	0	0	0	0	42040
1	42040.4	42040.5	42044	Gillian	1	0	1	0	0	0	0	0	0	0	0	0	0	0	0	42040
1	42040.5	42040.5	42044	Gillian	1	0	1	0	0	0	0	0	0	0	0	0	0	0	0	42040
1	42040.5	42040.5	42044	Gillian	1	0	0	0	0	0	0	0	0	0	0	0	0	0	0	42040
1	42040.5	42040.5	42044	Gillian	1	1	1	0	1	0	1	0	1	0	1	0	1	0	1	42040
1	42040.5	42040.5	42044	Gillian	1	1	1	1	0	0	1	0	1	1	1	0	1	0	1	42040
1	42040.5	42040.5	42044	Gillian	1	0	1	0	0	0	0	0	0	0	0	0	0	0	0	42040
1	42040.5	42040.6	42044	Gillian	1	1	1	0	1	0	1	0	0	0	1	0	1	0	0	42040
1	42040.6	42040.6	42044	Gillian	1	1	1	0	1	0	0	0	0	0	1	0	0	0	0	42040
1	42040.6	42040.9	42044	Gillian	1	1	1	0	1	0	1	0	1	0	1	0	1	0	0	42040
1	42041.3	42040.9	42044	Gillian	1	1	1	1	0	1	1	0	1	0	1	0	0	0	0	42041
1	42041.3	42041.3	42044	Gillian	1	0	1	0	0	0	0	0	0	0	0	0	0	0	0	42041
1	42041.3	42041.3	42044	Gillian	1	0	1	0	0	0	0	0	0	0	0	0	0	0	0	42041
1	42041.3	42041.3	42044	Gillian	1	0	1	0	0	0	0	0	0	0	0	0	0	0	0	42041
1	42041.3	42041.3	42044	Gillian	1	1	1	1	1	1	1	0	1	0	1	0	0	0	0	42041
1	42041.3	42041.3	42044	Gillian	1	0	1	0	0	0	0	0	0	0	0	0	0	0	0	42041
1	42041.3	42041.3	42044	Gillian	1	1	1	1	0	1	1	0	0	0	1	0	0	0	0	42041
1	42041.4	42041.4	42044	Gillian	1	1	1	1	1	0	1	0	0	0	0	0	0	0	0	42041
1	42041.4	42041.4	42044	Gillian	1	0	1	0	0	0	0	0	0	0	0	0	0	0	0	42041
1	42041.4	42041.4	42044	Gillian	1	1	0	1	0	0	0	0	0	0	0	0	0	0	0	42041
1	42041.4	42041.4	42044	Gillian	1	1	1	1	0	0	1	0	1	0	1	0	1	0	1	42041
1	42041.4	42041.4	42044	Gillian	1	0	1	0	0	0	0	0	0	0	0	0	0	0	0	42041
1	42041.4	42041.4	42044	Gillian	1	1	1	1	1	0	1	0	1	1	1	0	0	0	0	42041
1	42041.4	42041.4	42044	Gillian	1	0	1	0	0	0	0	0	0	0	0	0	0	0	0	42041
1	42041.4	42041.4	42044	Gillian	1	1	1	1	0	0	0	0	0	0	0	0	0	0	0	42041
1	42041.4	42041.4	42044	Gillian	1	0	0	0	0	0	0	0	0	0	0	0	0	0	0	42041
1	42041.4	42041.4	42044	Gillian	1	0	1	0	0	0	0	0	0	0	0	0	0	0	0	42041
1	42041.4	42041.4	42044	Gillian	1	0	1	0	0	0	0	0	0	0	0	0	0	0	0	42041
1	42041.4	42041.4	42044	Gillian	1	0	1	0	0	0	0	0	0	0	0	0	0	0	0	42041
1	42041.4	42041.4	42044	Gillian	1	0	1	0	0	0	0	0	0	0	0	0	0	0	0	42041
1	42041.4	42041.4	42044	Gillian	1	0	1	0	0	0	0	0	0	0	0	0	0	0	0	42041
1	42041.4	42041.4	42044	Gillian	1	0	1	0	0	0	0	0	0	0	0	0	0	0	0	42041
1	42041.4	42041.4	42044	Gillian	1	1	1	1	1	0	1	0	0	0	0	0	0	0	0	42041
1	42041.4	42041.4	42044	Gillian	1	0	1	0	0	0	0	0	0	0	0	0	0	0	0	42041
1	42041.4	42041.4	42044	Gillian	1	0	1	0	0	0	0	0	0	0	0	0	0	0	0	42041
1	42041.5	42041.5	42044	Gillian	1	1	1	0	0	0	0	0	0	0	0	1	1	0	0	42041
1	42041.5	42041.5	42044	Gillian	1	0	0	0	0	0	0	0	0	0	0	0	0	0	0	42041
1	42041.5	42041.5	42044	Gillian	1	1	1	0	0	0	0	0	0	0	0	0	0	0	0	42041
1	42041.5	42041.5	42044	Gillian	1	1	1	0	1	0	1	0	1	0	1	0	0	0	0	42041
1	42041.5	42041.5	42044	Gillian	1	0	1	0	0	0	0	0	0	0	0	0	0	0	0	42041
1	42041.5	42041.5	42044	Gillian	1	0	1	0	0	0	0	0	0	0	0	0	0	0	0	42041
1	42041.5	42041.5	42044	Gillian	1	1	1	0	1	1	1	0	1	0	1	0	1	0	1	42041
1	42041.5	42041.5	42044	Gillian	1	0	1	0	0	0	0	0	0	0	0	0	0	0	0	42041
1	42041.5	42041.5	42044	Gillian	1	0	0	0	0	0	0	0	0	0	0	0	0	0	0	42041
1	42041.6	42041.6	42044	Gillian	1	1	1	0	1	0	1	0	1	0	1	0	0	0	1	42041
1	42041.6	42041.6	42044	Gillian	1	1	1	0	1	0	1	0	1	0	1	0	1	0	1	42041
1	42041.6	42041.6	42045.9	Gillian	1	1	1	0	1	0	1	0	1	0	0	0	0	0	0	42041
1	42041.6	42041.6	42044	Gillian	1	1	1	0	0	0	1	0	1	0	1	0	0	0	0	42041
2	42045.3	42045.3	42045.9	Gillian	1	0	1	0	0	0	0	0	0	0	0	0	0	0	0	42045
2	42045.3	42045.3	42045.9	Gillian	1	1	1	0	0	0	1	0	0	0	0	0	0	0	1	42045
2	42045.3	42045.3	42045.9	Gillian	1	1	1	0	0	0	1	0	1	0	1	0	0	0	0	42045
2	42045.3	42045.3	42045.9	Gillian	1	1	1	0	1	1	1	0	1	0	1	0	1	0	1	42045
2	42045.3	42045.3	42045.9	Gillian	1	0	1	0	0	0	0	0	0	0	0	0	0	0	0	42045
2	42045.3	42045.4	42045.9	Gillian	1	1	1	0	1	0	1	0	1	0	1	0	1	0	0	42045
2	42045.3	42045.3	42045.9	Gillian	1	1	1	0	1	1	1	0	1	0	1	0	1	0	1	42045
2	42045.3	42045.3	42045.9	Gillian	1	1	1	0	1	0	1	0	1	0	1	0	1	0	0	42045
2	42045.3	42045.3	42045.9	Gillian	1	0	1	0	0	0	0	0	0	0	0	0	0	0	0	42045
2	42045.3	42045.3	42045.9	Gillian	1	0	1	0	0	0	0	0	0	0	0	0	0	0	0	42045
2	42045.3	42045.3	42045.9	Gillian	1	1	1	0	0	1	1	0	1	0	1	0	1	0	1	42045
2	42045.4	42045.4	42045.9	Gillian	1	1	1	0	0	0	1	0	0	0	0	0	1	0	1	42045
2	42045.4	42045.4	42045.9	Gillian	1	0	1	0	0	0	0	0	0	0	0	0	0	0	0	42045
2	42045.4	42045.4	42045.9	Gillian	1	1	1	0	1	0	1	0	1	0	1	0	1	0	1	42045
2	42045.4	42045.4	42045.9	Gillian	1	1	1	0	1	0	1	0	1	0	1	0	1	0	0	42045
2	42045.4	42045.4	42045.9	Gillian	1	1	0	0	0	0	0	0	0	0	0	0	0	0	0	42045
2	42045.4	42045.4	42045.9	Gillian	1	0	0	0	0	0	0	0	0	0	0	0	0	0	0	42045
2	42045.4	42045.4	42045.9	Gillian	1	1	1	0	0	0	1	0	1	0	1	0	1	0	1	42045
2	42045.4	42045.4	42045.9	Gillian	1	0	1	0	0	0	0	0	0	0	0	0	0	0	0	42045
2	42045.4	42045.4	42045.9	Gillian	1	0		0	0	0	0	0	0	0	0	0	0	0	0	42045
2	42045.4	42045.4	42045.9	Gillian	1	1	1	0	1	0	1	0	1	0	1	0	1	0	1	42045
2	42045.4	42045.4	42045.9	Gillian	1	1	1	0	1	0	1	0	1	0	1	0	1	0	0	42045
2	42045.4	42045.5	42046.9	Gillian	1	1	1	0	1	0	1	0	1	0	1	0	1	0	1	42045
2	42045.4	42045.4	42045.9	Gillian	1	1	1	0	1	0	1	0	1	0	0	0	0	0	0	42045
2	42045.5	42045.5	42045.9	Gillian	1	0	1	0	0	0	0	0	0	0	0	0	0	0	0	42045
2	42045.5	42045.5	42045.9	Gillian	1	0	1	0	0	0	0	0	0	0	0	0	0	0	0	42045
2	42045.5	42045.5	42046.9	Gillian	1	1	1	0	1	1	1	0	1	0	1	0	1	0	1	42045
2	42045.5	42045.5	42045.9	Gillian	1	1	1	0	0	0	0	0	1	0	1	0	1	0	1	42045
2	42045.5	42045.5	42045.9	Gillian	1	0	1	0	0	0	0	0	0	0	0	0	0	0	0	42045
2	42045.5	42045.5	42045.9	Gillian	1	1	1	1	0	0	1	0	1	0	1	1	0	0	0	42045
2	42045.5	42045.5	42045.9	Gillian	1	1	1	0	1	0	1	0	1	0	1	0	1	0	1	42045
2	42045.5	42045.5	42045.9	Gillian	1	0	0	0	0	0	0	0	0	0	0	0	0	0	0	42045
2	42045.5	42045.5	42045.9	Gillian	1	0	1	0	0	0	0	0	0	0	0	0	0	0	0	42045
2	42045.5	42045.5	42045.9	Gillian	1	1	1	0	1	0	1	0	0	0	1	0	1	0	0	42045
2	42045.5	42045.5	42045.9	Gillian	1	1	1	0	1	0	1	0	0	0	0	0	1	0	1	42045
2	42046.3	42046.3	42046.9	Tarynn	1	1	1	0	1	0	1	0	1	0	1	0	0	0	1	42046
2	42046.3	42046.4	42046.9	Tarynn	1	1	1	1	0	0	1	0	0	1	0	0	0	0	0	42046
2	42046.3	42046.3	42046.9	Tarynn	1	0	1	0	0	0	0	0	0	0	0	0	0	0	0	42046
2	42046.3	42046.4	42046.9	Tarynn	1	1	1	1	1	1	1	0	0	0	0	0	1	0	1	42046
2	42046.3	42046.3	42046.9	Tarynn	1	1	1	1	1	0	1	0	0	0	1	0	1	0	0	42046
2	42046.3	42046.3	42046.9	Tarynn	1	0	0	0	0	0	0	0	0	0	0	0	0	0	0	42046
2	42046.3	42046.3	42046.9	Tarynn	1	0	1	0	0	0	0	0	0	0	0	0	0	0	0	42046
2	42046.3	42046.3	42046.9	Tarynn	1	0	1	0	0	0	0	0	0	0	0	0	0	0	0	42046
2	42046.3	42046.3	42046.9	Tarynn	1	0	1	0	0	0	0	0	0	0	0	0	0	0	0	42046
2	42046.3	42046.3	42046.9	Tarynn	1	1	1	1	1	0	1	0	1	0	1	0	1	0	1	42046
2	42046.3	42046.3	42046.9	Tarynn	1	0	1	0	0	0	0	0	0	0	0	0	0	0	0	42046
2	42046.3	42046.3	42046.9	Tarynn	1	0	1	0	0	0	0	0	0	0	0	0	0	0	0	42046
2	42046.3	42046.3	42046.9	Tarynn	1	1	1	1	0	0	0	0	0	0	0	0	0	0	0	42046
2	42046.3	42046.3	42046.9	Tarynn	1	0	1	0	0	0	0	0	0	0	0	0	0	0	0	42046
2	42046.3	42046.3	42046.9	Tarynn	1	1	1	1	1	0	0	0	0	0	1	0	1	0	1	42046
2	42046.3	42046.3	42046.9	Tarynn	1	0	1	0	0	0	0	0	0	0	0	0	0	0	0	42046
2	42046.4	42046.4	42046.9	Tarynn	1	1	0	1	1	0	0	0	0	0	0	0	0	0	0	42046
2	42046.4	42046.4	42046.9	Tarynn	1	1	1	1	0	0	0	0	0	0	0	0	0	0	0	42046
2	42046.4	42046.4	42046.9	Tarynn	1	1	1	0	1	0	1	0	0	0	1	0	0	0	0	42046
2	42046.4	42046.4	42046.9	Tarynn	1	1	0	1	0	1	0	0	0	0	0	0	0	0	0	42046
2	42046.4	42046.4	42046.9	Tarynn	1	0	1	0	0	0	0	0	0	0	0	0	0	0	0	42046
2	42046.4	42046.4	42046.9	Tarynn	1	0	1	0	0	0	0	0	0	0	0	0	0	0	0	42046
2	42046.4	42046.4	42046.9	Tarynn	1	0	1	0	0	0	0	0	0	0	0	0	0	0	0	42046
2	42046.4	42046.4	42046.9	Tarynn	1	1	1	1	1	0	0	0	0	0	0	1	1	0	1	42046
2	42046.4	42046.4	42046.9	Tarynn	1	0	1	0	0	0	0	0	0	0	0	0	0	0	0	42046
2	42046.4	42046.4	42046.9	Tarynn	1	0	1	0	0	0	0	0	0	0	0	0	0	0	0	42046
2	42046.4	42046.4	42046.9	Tarynn	1	1	1	0	1	0	1	0	1	0	1	0	1	0	1	42046
2	42046.4	42046.4	42046.9	Tarynn	1	1	1	0	1	0	1	0	0	0	1	0	1	0	1	42046
2	42046.4	42046.4	42046.9	Tarynn	1	0	1	0	0	0	0	0	0	0	0	0	0	0	0	42046
2	42046.4	42046.4	42046.9	Tarynn	1	1	1	0	1	0	1	0	1	0	1	0	1	0	1	42046
2	42046.4	42046.4	42046.9	Tarynn	1	1	1	0	0	0	0	0	0	0	0	0	0	0	0	42046
2	42046.4	42046.4	42046.9	Tarynn	1	0	0	0	0	0	0	0	0	0	0	0	0	0	0	42046
2	42046.4	42046.4	42046.9	Tarynn	1	1	1	0	1	0	1	0	1	0	1	0	1	0	1	42046
2	42046.5	42046.5	42046.9	Tarynn	1	0	1	0	0	0	0	0	0	0	0	0	0	0	0	42046
2	42046.5	42046.5	42046.9	Tarynn	1	0	1	0	0	0	0	0	0	0	0	0	0	0	0	42046
2	42046.6	42046.6	42046.9	Tarynn	1	1		0	0	0	0	0	0	0	0	0	0	0	0	42046
2	42046.6	42046.6	42046.9	Tarynn	1	1		1	0	1	0	0	0	0	0	0	0	0	0	42046
2	42046.6	42046.6	42046.9	Tarynn	1	1	1	0	1	0	1	0	1	0	1	0	1	0	1	42046
2	42046.6	42046.6	42046.9	Tarynn	1	1	1	0	1	0	0	0	0	0	1	0	1	0	1	42046
2	42046.6	42046.6	42046.9	Tarynn	1	1	1	0	1	0	0	0	1	0	1	0	1	0	1	42046
2	42046.6	42046.6	42046.9	Tarynn	1	0		0	0	0	0	0	0	0	0	0	0	0	0	42046
2	42046.6	42046.6	42046.9	Tarynn	1	1	1	0	1	0	1	0	1	0	1	0	0	0	0	42046
2	42046.6	42046.6	42046.9	Tarynn	1	0	1	0	0	0	0	0	0	0	0	0	0	0	0	42046
2	42046.6	42046.6	42046.9	Tarynn	1	1	1	0	1	0	1	1	1	0	0	0	1	0	0	42046
3	42047.3	42047.3	42048.3	Gillian	1	0	1	0	0	0	0	0	0	0	0	0	0	0	0	42047
3	42047.3	42047.3	42048.3	Gillian	1	0	1	0	0	0	0	0	0	0	0	0	0	0	0	42047
3	42047.3	42047.4	42048.3	Gillian	1	0	1	0	0	0	0	0	0	0	0	0	0	0	0	42047
3	42047.3	42047.3	42048.3	Gillian	1	0	1	0	0	0	0	0	0	0	0	0	0	0	0	42047
3	42047.4	42047.4	42048.3	Gillian	1	1	1	0	0	0	1	0	0	0	0	0	0	0	0	42047
3	42047.4	42047.4	42048.3	Gillian	1	1	1	0	1	0	1	0	0	0	0	0	1	0	1	42047
3	42047.4	42047.6	42048.3	Gillian	1	1	0	1	0	1	0	0	0	0	0	0	0	0	0	42047
3	42047.4	42047.6	42050.9	Gillian	1	1	1	1	1	1	1	0	1	0	0	0	1	0	0	42047
3	42047.4	42047.4	42048.3	Gillian	1	1	1	0	0	0	0	0	0	0	0	0	0	0	0	42047
3	42047.4	42047.4	42048.3	Gillian	1	1	1	0	1	0	1	0	1	0	1	0	1	0	0	42047
3	42047.5	42047.4	42048.3	Gillian	1	1	1	0	1	0	1	0	1	0	1	0	1	0	1	42047
3	42047.5	42047.5	42048.3	Gillian	1	0	1	0	0	0	0	0	0	0	0	0	0	0	0	42047
3	42047.5	42047.5	42048.3	Gillian	1	0	1	0	0	0	0	0	0	0	0	0	0	0	0	42047
3	42047.5	42047.5	42048.3	Gillian	1	0	1	0	0	0	0	0	0	0	0	0	0	0	0	42047
3	42047.5	42047.6	42048.3	Gillian	1	1	1	1	1	0	0	0	0	0	0	0	1	0	1	42047
3	42047.6	42047.6	42048.3	Gillian	1	1	1	0	0	0	1	0	0	0	0	0	0	0	0	42047
3	42047.6	42047.6	42048.3	Gillian	1	1	1	0	0	0	0	0	0	0	0	0	0	0	0	42047
3	42048.4	42048.4	42050.9	Gillian	1	1	1	1	1	0	1	0	0	0	0	0	0	0	0	42048
3	42048.4	42048.4	42050.9	Gillian	1	1	1	0	0	0	1	0	1	0	0	0	0	0	0	42048
3	42048.4	42048.4	42050.9	Gillian	1	1	1	0	0	1	1	0	0	0	0	0	0	0	0	42048
3	42048.4	42048.4	42050.9	Gillian	1	1	1	0	0	0	0	0	1	0	0	0	0	0	0	42048
3	42048.4	42048.4	42050.9	Gillian	1	1	1	0	1	1	1	0	1	0	0	0	0	0	0	42048
3	42048.4	42048.4	42050.9	Gillian	1	1	1	0	0	0	0	0	0	0	0	0	0	0	0	42048
3	42048.4	42048.4	42050.9	Gillian	1	1	1	0	0	0	0	0	0	0	0	0	0	0	0	42048
3	42048.4	42048.4	42050.9	Gillian	1	1	1	0	1	0	1	0	0	0	0	0	0	0	1	42048
3	42048.4	42048.4	42050.9	Gillian	1	1	1	0	1	0	1	0	1	0	0	0	0	0	1	42048
3	42048.4	42048.4	42050.9	Gillian	1	1	1	0	1	0	1	0	1	0	0	0	0	0	1	42048
3	42048.4	42048.4	42050.9	Gillian	1	1	1	0	0	0	1	0	1	0	1	0	0	0	0	42048
3	42048.4	42048.4	42050.9	Gillian	1	1	1	0	1	0	1	0	1	0	0	1	0	0	0	42048
4	42051.3	42051.3	42052	Tarynn	1	1	1	0	0	0	1	0	1	0	1	0	1	0	0	42051
4	42051.3	42051.3	42052	Tarynn	1	1	1	0	1	1	1	0	1	0	1	0	1	0	1	42051
4	42051.3	42051.3	42052	Tarynn	1	0	1	0	0	0	0	0	0	0	0	0	0	0	0	42051
4	42051.3	42051.3	42052	Tarynn	1	1	1	0	1	0	1	0	1	0	1	0	1	0	1	42051
4	42051.3	42051.3	42052	Tarynn	1	0	1	0	0	0	0	0	0	0	0	0	0	0	0	42051
4	42051.3	42051.3	42052	Tarynn	1	1	1	0	1	0	1	0	1	0	1	0	1	0	1	42051
4	42051.3	42051.3	42052	Tarynn	1	1	1	0	1	0	1	0	1	1	1	0	1	0	1	42051
4	42051.3	42051.3	42052	Tarynn	1	1	1	0	1	0	1	0	1	1	1	0	1	0	1	42051
4	42051.3	42051.3	42052	Tarynn	1	0	1	0	0	0	0	0	0	0	0	0	0	0	0	42051
4	42051.3	42051.3	42052	Tarynn	1	1	1	0	1	0	1	0	1	1	1	0	1	0	1	42051
4	42051.3	42051.3	42052	Tarynn	1	1	1	0	1	0	1	0	1	0	1	0	1	0	0	42051
4	42051.3	42051.3	42052	Tarynn	1	0	1	0	0	0	0	0	0	0	0	0	0	0	0	42051
4	42051.3	42051.3	42052	Tarynn	1	0	1	0	0	0	0	0	0	0	0	0	0	0	0	42051
4	42051.3	42051.3	42052	Tarynn	1	0	1	0	0	0	0	0	0	0	0	0	0	0	0	42051
4	42051.3	42051.3	42052	Tarynn	1	0	1	0	0	0	0	0	0	0	0	0	0	0	0	42051
4	42051.3	42051.3	42052	Tarynn	1	1	1	0	1	1	1	0	0	0	0	0	0	0	0	42051
4	42051.3	42051.3	42052	Tarynn	1	1	1	0	0	1	1	1	1	0	1	0	0	0	0	42051
4	42051.3	42051.3	42052	Tarynn	1	1	1	0	0	0	1	0	0	0	1	0	1	1	1	42051
4	42051.3	42051.3	42052	Tarynn	1	0	1	0	0	0	0	0	0	0	0	0	0	0	0	42051
4	42051.3	42051.3	42052	Tarynn	1	1	1	0	1	0	1	0	1	0	1	0	1	0	1	42051
4	42051.3	42051.3	42052	Tarynn	1	0	1	0	0	0	0	0	0	0	0	0	0	0	0	42051
4	42051.3	42051.3	42052	Tarynn	1	1	1	0	1	0	1	0	1	0	1	0	1	0	1	42051
4	42051.3	42051.3	42052	Tarynn	1	0	1	0	0	0	0	0	0	0	0	0	0	0	0	42051
4	42051.3	42051.3	42052	Tarynn	1	1	1	0	1	0	1	0	1	0	1	0	1	0	0	42051
4	42051.3	42051.3	42052	Tarynn	1	1	1	0	1	0	1	0	1	0	0	0	1	0	0	42051
4	42051.3	42051.4	42052	Tarynn	1	1	1	1	0	0	1	0	1	0	0	0	0	0	0	42051
4	42051.4	42051.4	42052	Tarynn	1	1	1	0	0	0	1	0	0	1	1	0	1	0	1	42051
4	42051.4	42051.4	42052	Tarynn	1	1	1	0	0	0	1	0	0	0	0	0	0	0	0	42051
4	42051.4	42051.4	42052	Tarynn	1	1	1	0	0	0	0	0	0	0	0	0	0	0	0	42051
4	42051.4	42051.4	42052	Tarynn	1	1	1	0	1	0	1	0	1	0	1	0	1	0	0	42051
4	42051.4	42051.4	42052	Tarynn	1	1	1	0	0	0	0	0	0	0	0	0	0	0	0	42051
4	42051.4	42051.4	42052	Tarynn	1	1	1	0	1	1	1	0	1	1	1	0	1	0	1	42051
4	42051.4	42051.4	42052	Tarynn	1	1	1	0	1	1	1	0	0	1	1	0	1	0	1	42051
4	42051.4	42051.4	42052	Tarynn	1	1	1	0	0	0	1	0	0	0	0	0	0	0	0	42051
4	42052.3	42052.3	42057.9	Gillian	1	0	1	0	0	0	0	0	0	0	0	0	0	0	0	42052
4	42052.3	42052.3	42057.9	Gillian	1	1	1	0	0	0	1	0	1	0	0	0	1	0	0	42052
4	42052.3	42052.3	42057.9	Gillian	1	1	1	0	0	0	1	0	0	0	0	0	1	0	0	42052
4	42052.3	42052.3	42057.9	Gillian	1	1	1	0	0	0	0	0	0	0	0	0	0	0	0	42052
4	42052.3	42052.3	42057.9	Gillian	1	0	1	0	0	0	0	0	0	0	0	0	0	0	0	42052
4	42052.3	42052.3	42057.9	Gillian	1	1	1	0	1	1	1	0	0	0	0	0	0	0	0	42052
4	42052.3	42052.3	42057.9	Gillian	1	1	1	0	1	0	1	0	0	0	0	0	0	0	0	42052
4	42052.3	42052.3	42057.9	Gillian	1	1	1	0	1	0	1	0	0	0	1	0	0	0	0	42052
4	42052.3	42052.3	42057.9	Gillian	1	0	1	0	0	0	0	0	0	0	0	0	0	0	0	42052
4	42052.3	42052.3	42057.9	Gillian	1	1	1	0	1	0	1	0	0	0	0	0	0	0	0	42052
4	42052.3	42052.3	42057.9	Gillian	1	1	1	0	1	0	1	0	1	0	1	0	1	0	1	42052
4	42052.3	42052.3	42057.9	Gillian	1	1	1	0	0	0	0	0	0	0	0	0	0	0	1	42052
4	42052.3	42052.3	42057.9	Gillian	1	1	1	0	1	0	1	0	1	0	1	0	0	0	0	42052
4	42052.3	42052.3	42057.9	Gillian	1	1	1	0	1	0	1	0	0	0	0	0	0	0	0	42052
4	42052.3	42052.4	42057.9	Gillian	1	1	1	0	0	0	0	0	0	0	0	0	1	0	0	42052
4	42052.4	42052.4	42057.9	Gillian	1	1	1	0	0	0	0	0	0	0	0	0	0	0	0	42052
4	42052.4	42052.4	42057.9	Gillian	1	1	1	0	1	0	1	0	1	0	1	0	1	0	0	42052
4	42052.4	42052.4	42057.9	Gillian	1	1	1	0	1	0	1	0	0	0	0	0	0	0	0	42052
4	42052.4	42052.4	42057.9	Gillian	1	1	1	0	1	0	1	0	1	0	1	0	0	0	0	42052
4	42052.4	42052.4	42057.9	Gillian	1	1	1	0	1	0	1	0	1	0	1	0	1	0	1	42052
4	42052.4	42052.4	42057.9	Gillian	1	1	1	0	1	0	1	0	0	0	1	0	1	0	0	42052
4	42052.4	42052.4	42057.9	Gillian	1	1	1	0	1	0	1	0	0	0	0	0	0	0	0	42052
4	42052.4	42052.4	42057.9	Gillian	1	1	1	0	0	0	0	0	0	0	0	0	0	0	0	42052
4	42052.4	42052.4	42057.9	Gillian	1	1	1	0	1	0	1	0	1	0	0	0	0	0	0	42052
4	42052.4	42052.4	42057.9	Gillian	1	1	1	0	0	0	0	1	1	0	0	0	0	0	0	42052
4	42052.4	42052.4	42057.9	Gillian	1	1	1	0	0	1	0	0	0	0	0	0	0	0	0	42052
4	42052.4	42052.4	42057.9	Gillian	1	1	1	0	0	1	1	0	0	0	1	0	1	0	0	42052
4	42052.5	42052.5	42057.9	Gillian	1	1	1	0	0	1	0	0	1	0	0	0	0	0	0	42052
5	42053.3	42053.3	42057.9	Tarynn	1	0	1	0	0	0	0	0	0	0	0	0	0	0	0	42053
5	42053.3	42053.3	42057.9	Tarynn	1	1	1	1	1	0	1	0	1	0	1	0	0	0	0	42053
5	42053.3	42053.3	42057.9	Tarynn	1	1	1	0	0	0	1	0	1	0	0	0	1	0	0	42053
5	42053.3	42053.3	42057.9	Tarynn	1	0	1	0	0	0	0	0	0	0	0	0	0	0	0	42053
5	42053.3	42053.3	42057.9	Tarynn	1	1	1	0	1	0	1	0	1	0	1	0	0	0	0	42053
5	42053.3	42053.3	42057.9	Tarynn	1	1	1	0	1	0	0	0	0	0	0	0	0	0	0	42053
5	42053.3	42053.3	42057.9	Tarynn	1	1	1	1	1	1	1	0	1	0	1	0	1	0	1	42053
5	42053.3	42053.3	42057.9	Tarynn	1	0	1	0	0	0	0	0	0	0	0	0	0	0	0	42053
5	42053.4	42053.4	42057.9	Tarynn	1	1	1	0	0	0	0	0	0	0	0	0	0	0	0	42053
5	42053.4	42053.4	42057.9	Tarynn	1	1	1	0	1	0	1	0	0	0	0	0	0	0	0	42053
5	42053.4	42053.4	42057.9	Tarynn	1	0	1	0	0	0	0	0	0	0	0	0	0	0	0	42053
5	42053.4	42053.4	42057.9	Tarynn	1	1	1	0	1	0	1	0	0	0	0	0	0	0	0	42053
5	42053.4	42053.4	42057.9	Tarynn	1	0	1	0	0	0	0	0	0	0	0	0	0	0	0	42053
5	42053.4	42053.4	42057.9	Tarynn	1	0	1	0	0	0	0	0	0	0	0	0	0	0	0	42053
5	42053.4	42053.4	42057.9	Tarynn	1	1	1	0	1	0	1	0	1	0	1	0	0	0	0	42053
5	42053.4	42053.4	42057.9	Tarynn	1	1	1	0	1	0	1	0	1	0	1	0	1	0	0	42053
5	42053.4	42053.4	42057.9	Tarynn	1	1	1	0	1	0	0	0	0	0	0	0	1	0	0	42053
5	42053.4	42053.4	42057.9	Tarynn	1	1	1	0	1	0	1	0	1	0	1	0	1	0	1	42053
5	42053.4	42053.4	42057.9	Tarynn	1	1	1	0	0	0	0	0	0	0	0	0	0	0	0	42053
5	42053.4	42053.4	42057.9	Tarynn	1	0	1	0	0	0	0	0	0	0	0	0	0	0	0	42053
5	42053.4	42053.4	42057.9	Tarynn	1	0	1	0	0	0	0	0	0	0	0	0	0	0	0	42053
5	42053.4	42053.4	42057.9	Tarynn	1	1	1	1	1	1	1	0	1	0	1	0	0	0	1	42053
6	42054.4	42054.4	42057.9	Gillian	1	1	1	0	1	0	0	0	0	0	1	0	0	0	0	42054
6	42054.4	42054.4	42057.9	Gillian	1	1	1	0	1	0	0	0	1	0	0	0	1	0	0	42054
6	42054.4	42054.4	42057.9	Gillian	1	1	1	0	1	0	1	0	1	0	1	0	1	0	1	42054
6	42054.4	42054.4	42057.9	Gillian	1	1	1	0	1	0	0	0	1	0	1	0	1	0	1	42054
6	42054.4	42054.4	42057.9	Gillian	1	1	1	0	1	0	1	0	1	0	1	0	1	0	1	42054
6	42054.4	42054.4	42057.9	Gillian	1	1	1	0	1	0	1	0	1	0	1	0	1	0	1	42054
6	42054.4	42054.4	42057.9	Gillian	1	1	1	0	0	0	0	0	0	0	1	0	0	0	0	42054
6	42054.4	42054.4	42057.9	Gillian	1	1	1	0	1	0	1	0	0	0	0	0	1	1	1	42054
6	42054.4	42054.4	42057.9	Gillian	1	1	1	0	0	0	1	0	0	0	0	0	1	0	0	42054
6	42054.4	42054.4	42057.9	Gillian	1	1	1	0	0	0	1	0	0	0	1	0	0	0	0	42054
6	42054.4	42054.4	42057.9	Gillian	1	1	1	0	1	1	1	0	1	1	1	0	1	0	1	42054
6	42054.4	42054.4	42057.9	Gillian	1	1	1	0	1	0	0	0	0	0	1	0	0	0	0	42054
6	42054.4	42054.4	42057.9	Gillian	1	1	1	0	0	0	0	0	0	0	1	0	0	0	0	42054
6	42054.4	42054.4	42057.9	Gillian	1	0	1	0	0	0	0	0	0	0	0	0	0	0	0	42054
6	42054.4	42054.4	42057.9	Gillian	1	1	1	0	1	0	1	0	1	0	0	0	1	0	0	42054
6	42054.5	42054.5	42057.9	Gillian	1	1	1	0	0	0	0	0	0	0	0	1	1	0	0	42054
6	42054.5	42054.5	42057.9	Gillian	1	1	1	0	0	0	0	0	0	0	0	0	1	0	0	42054
5	42054.5	42054.5	42057.9	Tarynn	1	1	1	0	0	0	0	0	0	1	1	0	0	0	0	42054
5	42054.5	42054.5	42057.9	Tarynn	1	1	1	0	1	0	1	0	0	0	0	0	1	0	1	42054
5	42054.5	42054.5	42057.9	Tarynn	1	0	1	0	0	0	0	0	0	0	0	0	0	0	0	42054
5	42054.5	42054.5	42057.9	Tarynn	1	0	1	0	0	0	0	0	0	0	0	0	0	0	0	42054
5	42054.5	42054.5	42057.9	Tarynn	1	1	1	0	1	0	1	0	1	0	1	0	1	0	0	42054
5	42054.5	42054.5	42057.9	Tarynn	1	1	1	0	1	1	1	0	1	0	1	0	1	0	1	42054
5	42054.5	42054.5	42057.9	Tarynn	1	0	1	0	0	0	0	0	0	0	0	0	0	0	0	42054
5	42054.5	42054.5	42057.9	Tarynn	1	1	1	0	0	0	1	0	1	0	1	0	1	0	0	42054
5	42054.5	42054.5	42057.9	Tarynn	1	0	1	0	0	0	0	0	0	0	0	0	0	0	0	42054
5	42054.5	42054.5	42057.9	Tarynn	1	0	1	0	0	0	0	0	0	0	0	0	0	0	0	42054
5	42054.5	42054.5	42057.9	Tarynn	1	1	1	0	1	0	1	0	0	0	1	0	0	0	0	42054
5	42054.5	42054.5	42057.9	Tarynn	1	0	1	0	0	0	0	0	0	0	0	0	0	0	0	42054
5	42054.5	42054.5	42057.9	Tarynn	1	0	1	0	0	0	0	0	0	0	0	0	0	0	0	42054
5	42054.6	42054.6	42057.9	Tarynn	1	1	1	0	0	0	1	0	1	0	1	0	1	0	0	42054
5	42054.6	42054.6	42057.9	Tarynn	1	1	0	0	0	0	0	0	0	1	0	0	0	0	0	42054
6	42055.4	42055.4	42057.9	Gillian	1	1	1	0	1	0	1	0	1	0	1	0	1	0	1	42055
6	42055.4	42055.4	42057.9	Gillian	1	1	1	0	1	0	1	0	1	0	1	0	1	0	0	42055
6	42055.4	42055.4	42057.9	Gillian	1	1	1	0	0	0	0	0	0	0	0	0	0	0	0	42055
6	42055.4	42055.4	42057.9	Gillian	1	1	1	0	0	0	0	0	1	0	0	0	1	0	0	42055
6	42055.4	42055.4	42057.9	Gillian	1	1	1	0	0	0	1	0	0	0	1	0	1	0	1	42055
6	42055.4	42055.4	42057.9	Gillian	1	1	1	0	0	0	0	0	0	0	1	0	1	0	0	42055
6	42055.4	42055.4	42057.9	Gillian	1	1	1	0	0	0	1	0	0	0	0	0	1	0	0	42055
6	42055.4	42055.4	42057.9	Gillian	1	1	1	0	0	0	1	0	0	0	1	0	1	0	0	42055
6	42055.4	42055.4	42057.9	Gillian	1	1	1	0	0	0	1	0	0	0	0	0	0	0	0	42055
6	42055.4	42055.4	42057.9	Gillian	1	1	1	0	1	0	1	0	0	0	0	0	1	0	0	42055
6	42055.4	42055.4	42057.9	Gillian	1	1	1	0	0	0	1	0	1	0	1	0	1	0	1	42055
6	42055.4	42055.4	42057.9	Gillian	1	1	1	0	0	0	0	0	1	0	0	0	1	0	0	42055
6	42055.4	42055.4	42057.9	Gillian	1	1	1	0	1	0	1	0	0	0	1	0	1	0	0	42055
6	42055.4	42055.4	42057.9	Gillian	1	1	1	0	0	0	1	0	1	0	0	0	0	0	0	42055
6	42055.4	42055.4	42057.9	Gillian	1	1	1	0	1	0	0	0	0	0	1	1	1	0	1	42055
6	42055.5	42055.5	42057.9	Gillian	1	1	1	0	0	0	0	0	0	0	0	0	1	0	0	42055
6	42055.5	42055.5	42057.9	Gillian				0	0	0	0	0	0	0	0	0	0	0	0
7	42058.3	42058.3	42081.4	Tarynn	1	1	1	0	0	0	0	0	0	0	0	0	0	0	0	42058
7	42058.3	42058.3	42081.4	Tarynn	1	0	1	0	0	0	0	0	0	0	0	0	0	0	0	42058
7	42058.3	42058.3	42081.4	Tarynn	1	1	1	0	1	1	1	0	1	0	1	0	1	0	1	42058
7	42058.3	42058.3	42081.4	Tarynn	1	0	1	0	0	0	0	0	0	0	0	0	0	0	0	42058
7	42058.3	42058.3	42081.4	Tarynn	1	0	1	0	0	0	0	0	0	0	0	0	0	0	0	42058
7	42058.3	42058.3	42081.4	Tarynn	1	1	1	0	1	0	1	0	1	0	0	0	0	0	0	42058
7	42058.3	42058.3	42081.4	Tarynn	1	0	0	0	0	0	0	0	0	0	0	0	0	0	0	42058
7	42058.3	42058.3	42081.4	Tarynn	1	0	1	0	0	0	0	0	0	0	0	0	0	0	0	42058
7	42058.3	42058.3	42081.4	Tarynn	1	1	1	0	1	0	1	0	1	0	1	0	1	0	0	42058
7	42058.3	42058.3	42081.4	Tarynn	1	0	0	0	0	0	0	0	0	0	0	0	0	0	0	42058
7	42058.4	42058.4	42081.4	Tarynn	1	1	0	1	0	0	0	0	0	0	0	0	0	0	0	42058
7	42058.4	42058.4	42081.4	Tarynn	1	0	1	0	0	0	0	0	0	0	0	0	0	0	0	42058
7	42058.4	42058.4	42081.4	Tarynn	1	1	0	0	0	0	0	0	0	0	0	0	0	0	0	42058
7	42058.4	42058.4	42081.4	Tarynn	1	1	1	0	1	0	1	0	1	0	1	0	0	0	0	42058
7	42058.4	42058.4	42081.4	Tarynn	1	0	1	0	0	0	0	0	0	0	0	0	0	0	0	42058
7	42058.4	42058.4	42081.4	Tarynn	1	1	1	0	0	0	1	0	1	1	0	0	0	0	0	42058
7	42058.4	42058.4	42081.4	Tarynn	1	0	1	0	0	0	0	0	0	0	0	0	0	0	0	42058
7	42058.4	42058.4	42081.4	Tarynn	1	0	1	0	0	0	0	0	0	0	0	0	0	0	0	42058
7	42058.4	42058.4	42081.4	Tarynn	1	0	1	0	0	0	0	0	0	0	0	0	0	0	0	42058
7	42058.4	42058.4	42081.4	Tarynn	1	0	1	0	0	0	0	0	0	0	0	0	0	0	0	42058
8	42059.3	42059.3	42081.4	Gillian	1	1	1	0	0	0	1	0	1	0	1	0	0	0	0	42059
8	42059.3	42059.3	42081.4	Gillian	1	0	1	0	0	0	0	0	0	0	0	0	0	0	0	42059
8	42059.3	42059.3	42081.4	Gillian	1	0	1	0	0	0	0	0	0	0	0	0	0	0	0	42059
8	42059.3	42059.3	42081.4	Gillian	1	0	0	0	0	0	0	0	0	0	0	0	0	0	0	42059
8	42059.3	42059.3	42081.4	Gillian	1	1	0	0	0	0	1	0	0	0	1	0	1	0	0	42059
8	42059.3	42059.3	42081.4	Gillian	1	0	0	0	0	0	0	0	0	0	0	0	0	0	0	42059
8	42059.4	42059.4	42081.4	Gillian	1	0	1	0	0	0	0	0	0	0	0	0	0	0	0	42059
8	42059.4	42059.4	42081.4	Gillian	1	0	1	0	0	0	0	0	0	0	0	0	0	0	0	42059
8	42059.4	42059.4	42081.4	Gillian	1	1	1	0	0	0	1	0	1	0	1	0	1	0	0	42059
8	42059.4	42059.4	42081.4	Gillian	1	1	1	0	1	0	1	0	1	0	1	0	1	0	1	42059
8	42059.4	42059.4	42081.4	Gillian	1	1	1	0	0	0	1	1	0	0	1	0	1	0	0	42059
8	42059.4	42059.4	42081.4	Gillian	1	0	1	0	0	0	0	0	0	0	0	0	0	0	0	42059
8	42059.4	42059.4	42081.4	Gillian	1	1	1	0	1	0	1	0	1	0	1	0	1	0	1	42059
8	42059.4	42059.4	42081.4	Gillian	1	0	1	0	0	0	0	0	0	0	0	0	0	0	0	42059
8	42059.4	42059.4	42081.4	Gillian	1	1	1	0	1	0	1	0	0	0	1	0	0	0	1	42059
8	42059.4	42059.4	42081.4	Gillian	1	0	1	0	0	0	0	0	0	0	0	0	0	0	0	42059
8	42059.4	42059.4	42081.4	Gillian	1	1	1	0	1	0	1	0	1	0	1	0	0	0	0	42059
8	42059.4	42059.4	42081.4	Gillian	1	0	0	0	0	0	0	0	0	0	0	0	0	0	0	42059
8	42059.4	42059.4	42081.4	Gillian	1	1	1	0	1	0	1	0	1	0	1	0	1	0	1	42059
8	42059.4	42059.4	42081.4	Gillian	1	0	0	0	0	0	0	0	0	0	0	0	0	0	0	42059
8	42059.4	42059.4	42081.4	Gillian	1	0	0	0	0	0	0	0	0	0	0	0	0	0	0	42059
8	42059.4	42059.4	42081.4	Gillian	1	0	0	0	0	0	0	0	0	0	0	0	0	0	0	42059
7	42059.4	42059.4	42081.4	Tarynn	1	1	1	0	1	0	1	0	1	0	1	0	1	0	0	42059
8	42059.4	42059.4	42081.4	Gillian	1	0	1	0	0	0	0	0	0	0	0	0	0	0	0	42059
7	42059.4	42059.4	42081.4	Tarynn	1	1	1	0	1	0	1	0	1	0	1	0	1	0	0	42059
8	42059.4	42059.4	42081.4	Gillian	1	0	1	0	0	0	0	0	0	0	0	0	0	0	0	42059
8	42059.4	42059.4	42081.4	Gillian	1	0	1	0	0	0	0	0	0	0	0	0	0	0	0	42059
8	42059.4	42059.4	42081.4	Gillian	1	1	1	0	1	1	1	0	1	0	1	0	1	0	1	42059
7	42059.4	42059.4	42081.4	Tarynn	1	1	1	0	1	0	1	0	0	0	1	0	1	0	0	42059
8	42059.4	42059.4	42081.4	Gillian	1	0	1	0	0	0	0	0	0	0	0	0	0	0	0	42059
8	42059.4	42059.4	42081.4	Gillian	1	1	1	0	1	0	1	0	1	0	1	0	0	0	0	42059
8	42059.4	42059.4	42081.4	Gillian	1	0	1	0	0	0	0	0	0	0	0	0	0	0	0	42059
8	42059.4	42059.4	42081.4	Gillian	1	0	1	0	0	0	0	0	0	0	0	0	0	0	0	42059
8	42059.4	42059.4	42081.4	Gillian	1	1	1	0	1	0	1	0	1	0	0	0	0	0	1	42059
7	42059.4	42059.4	42081.4	Tarynn	1	0	1	0	0	0	0	0	0	0	0	0	0	0	0	42059
8	42059.4	42059.4	42081.4	Gillian	1	0	1	0	0	0	0	0	0	0	0	0	0	0	0	42059
7	42059.4	42059.4	42081.4	Tarynn	1	1	1	0	1	1	1	0	1	0	1	0	0	0	0	42059
7	42059.5	42059.5	42081.4	Tarynn	1	0	1	0	0	0	0	0	0	0	0	0	0	0	0	42059
7	42059.5	42059.5	42081.4	Tarynn	1	0	1	0	0	0	0	0	0	0	0	0	0	0	0	42059
7	42059.5	42059.5	42081.4	Tarynn	1	1	1	0	1	0	1	0	1	0	0	0	0	0	0	42059
7	42059.6	42059.6	42081.4	Tarynn	1	1	1	0	1	0	1	0	0	0	1	0	0	0	0	42059
8	42060.4	42060.4	42081.4	Gillian	1	1	1	0	1	0	1	0	1	0	1	0	1	0	0	42060
8	42060.4	42060.4	42081.4	Gillian	1	0	0	0	0	0	0	0	0	0	0	0	0	0	0	42060
8	42060.4	42060.4	42081.4	Gillian	1	0	1	0	0	0	0	0	0	0	0	0	0	0	0	42060
8	42060.4	42060.4	42081.4	Gillian	1	1	1	0	1	0	1	0	1	0	1	0	1	0	1	42060
8	42060.4	42060.4	42081.4	Gillian	1	0	1	0	0	0	0	0	0	0	0	0	0	0	0	42060
8	42060.4	42060.4	42081.4	Gillian	1	1	1	0	1	0	1	0	1	0	1	0	1	0	1	42060
8	42060.4	42060.4	42081.4	Gillian	1	0	1	0	0	0	0	0	0	0	0	0	0	0	0	42060
8	42060.4	42060.4	42081.4	Gillian	1	1	1	0	0	0	1	0	1	0	1	0	0	0	0	42060
8	42060.4	42060.4	42081.4	Gillian	1	1	1	0	1	0	1	0	1	0	1	0	1	0	0	42060
8	42060.4	42060.4	42081.4	Gillian	1	0	1	0	0	0	0	0	0	0	0	0	0	0	0	42060
8	42060.4	42060.4	42081.4	Gillian	1	0	1	0	0	0	0	0	0	0	0	0	0	0	0	42060
8	42060.4	42060.4	42081.4	Gillian	1	1	1	0	1	0	1	0	1	0	0	0	0	0	1	42060
8	42060.4	42060.4	42081.4	Gillian	1	0	1	0	0	0	0	0	0	0	0	0	0	0	0	42060
8	42060.4	42060.4	42081.4	Gillian	1	0	1	0	0	0	0	0	0	0	0	0	0	0	0	42060
8	42060.4	42060.4	42081.4	Gillian	1	0	1	0	0	0	0	0	0	0	0	0	0	0	0	42060
8	42060.4	42060.4	42081.4	Gillian	1	0	1	0	0	0	0	0	0	0	0	0	0	0	0	42060
8	42060.4	42060.4	42081.4	Gillian	1	0	1	0	0	0	0	0	0	0	0	0	0	0	0	42060
8	42060.4	42060.4	42081.4	Gillian	1	1	1	0	1	0	1	0	0	0	1	0	1	0	0	42060
8	42060.4	42060.4	42081.4	Gillian	1	0	1	0	0	0	0	0	0	0	0	0	0	0	0	42060
8	42060.4	42060.4	42081.4	Gillian	1	0	1	0	0	0	0	0	0	0	0	0	0	0	0	42060
8	42060.4	42060.4	42081.4	Gillian	1	0	1	0	0	0	0	0	0	0	0	0	0	0	0	42060
8	42060.4	42060.4	42081.4	Gillian	1	1	1	0	1	0	1	0	1	0	1	0	1	0	0	42060
8	42060.4	42060.4	42081.4	Gillian	1	1	1	0	1	0	1	0	1	0	0	0	0	0	1	42060
9	42061.4	42061.4	42081.4	Tarynn	1	1	1	0	1	0	0	0	0	0	0	0	0	0	0	42061
9	42061.4	42061.4	42081.4	Tarynn	1	1	1	1	1	1	1	0	0	0	1	0	0	0	0	42061
9	42061.4	42061.4	42081.4	Tarynn	1	1	1	0	1	0	0	0	0	0	0	0	1	0	0	42061
9	42061.4	42061.4	42081.4	Tarynn	1	0	0	0	0	0	0	0	0	0	0	0	0	0	0	42061
9	42061.4	42061.4	42081.4	Tarynn	1	1	1	0	0	0	0	0	0	1	0	0	0	0	0	42061
9	42061.4	42061.4	42081.4	Tarynn	1	1	1	0	0	0	0	0	0	0	0	0	1	0	0	42061
9	42061.4	42061.4	42081.4	Tarynn	1	0	1	0	0	0	0	0	0	0	0	0	0	0	0	42061
9	42061.4	42061.4	42081.4	Tarynn	1	0	0	0	0	0	0	0	0	0	0	0	0	0	0	42061
9	42061.4	42061.4	42081.4	Tarynn	1	0	0	0	0	0	0	0	0	0	0	0	0	0	0	42061
9	42061.4	42061.4	42081.4	Tarynn	1	1	1	0	1	1	0	0	0	1	0	0	1	0	0	42061
9	42062.4	42062.4	42081.4	Gillian	1	1	0	0	0	0	0	0	0	0	0	0	0	0	0	42062
9	42062.4	42062.4	42081.4	Gillian	1	0	1	0	0	0	0	0	0	0	0	0	0	0	0	42062
9	42062.4	42062.4	42081.4	Gillian	1	0	1	0	0	0	0	0	0	0	0	0	0	0	0	42062
9	42062.4	42062.4	42081.4	Gillian	1	1	1	0	0	0	0	0	0	0	0	0	0	0	0	42062
9	42062.4	42062.4	42081.4	Gillian	1	1	1	0	0	0	1	0	0	0	0	0	0	0	0	42062
9	42062.4	42062.4	42081.4	Gillian	1	0	1	0	0	0	0	0	0	0	0	0	0	0	0	42062
9	42062.4	42062.4	42081.4	Gillian	1	1	1	0	1	0	1	1	0	1	0	0	0	0	0	42062
9	42062.4	42062.4	42081.4	Gillian	1	0	1	0	0	0	0	0	0	0	0	0	0	0	0	42062
9	42062.4	42062.4	42081.4	Gillian	1	0	0	0	0	0	0	0	0	0	0	0	0	0	0	42062
9	42062.5	42062.5	42081.4	Gillian	1	1	1	0	1	0	1	0	0	0	1	1	0	0	0	42062
9	42062.5	42062.5	42081.4	Gillian	1	0	1	0	0	0	0	0	0	0	0	0	0	0	0	42062
10	42066.4	42066.4	42081.4	Gillian	1	0	1	0	0	0	0	0	0	0	0	0	0	0	0	42066
10	42066.4	42066.4	42081.4	Gillian	1	1	1	0	0	0	0	0	0	0	1	0	0	0	0	42066
10	42066.4	42066.4	42081.4	Gillian	1	1	1	0	0	0	0	0	0	0	0	0	0	0	0	42066
10	42066.4	42066.4	42081.4	Gillian	1	1	0	0	0	0	0	0	0	0	0	0	0	0	0	42066
10	42066.4	42066.4	42081.4	Gillian	1	1	1	0	1	0	1	0	0	0	1	0	1	0	0	42066
10	42066.4	42066.4	42081.4	Gillian	1	1	0	0	0	0	0	0	0	0	0	0	0	0	0	42066
10	42066.4	42066.4	42081.4	Gillian	1	0	0	0	0	0	0	0	0	0	0	0	0	0	0	42066
10	42066.4	42066.4	42081.4	Gillian	1	0	1	0	0	0	0	0	0	0	0	0	0	0	0	42066
10	42066.4	42066.4	42081.4	Gillian	1	0	0	0	0	0	0	0	0	0	0	0	0	0	0	42066
10	42066.4	42066.4	42081.4	Gillian	1	0	1	0	0	0	0	0	0	0	0	0	0	0	0	42066
10	42066.4	42066.4	42081.4	Gillian	1	0	1	0	0	0	0	0	0	0	0	0	0	0	0	42066
10	42066.4	42066.4	42081.4	Gillian	1	1	1	0	1	0	1	0	0	0	1	0	0	0	1	42066
10	42066.4	42066.4	42081.4	Gillian	1	1	1	0	1	0	1	0	0	0	1	0	1	0	0	42066
10	42066.4	42066.4	42081.4	Gillian	1	1	1	0	0	0	1	0	0	0	0	0	1	0	0	42066
10	42066.4	42066.4	42081.4	Gillian	1	1	1	0	1	0	1	0	1	0	1	0	1	0	1	42066
10	42066.4	42066.4	42081.4	Gillian	1	0	1	0	0	0	0	0	0	0	0	0	0	0	0	42066
10	42066.4	42066.4	42081.4	Gillian	1	1	0	0	0	0	0	0	0	0	0	0	0	0	0	42066
10	42066.4	42066.4	42081.4	Gillian	1	0	1	0	0	0	0	0	0	0	0	0	0	0	0	42066
10	42066.4	42066.4	42081.4	Gillian	1	0	0	0	0	0	0	0	0	0	0	0	0	0	0	42066
10	42066.4	42066.4	42081.4	Gillian	1	0	1	0	0	0	0	0	0	0	0	0	0	0	0	42066
10	42066.4	42066.4	42081.4	Gillian	1	1	1	0	0	0	1	0	0	0	1	0	0	0	0	42066
10	42066.4	42066.4	42081.4	Gillian	1	1	1	0	0	0	0	0	1	0	1	0	1	0	0	42066
10	42067.4	42067.4	42081.4	Gillian	1	0	1	0	0	0	0	0	0	0	0	0	0	0	0	42067
10	42067.4	42067.4	42081.4	Gillian	1	0	1	0	0	0	0	0	0	0	0	0	0	0	0	42067
10	42067.4	42067.4	42081.4	Gillian	1	0	1	0	0	0	0	0	0	0	0	0	0	0	0	42067
10	42067.4	42067.4	42081.4	Gillian	1	1	1	0	0	0	0	0	0	0	0	0	0	0	0	42067
10	42067.4	42067.4	42081.4	Gillian	1	0		0	0	0	0	0	0	0	0	0	0	0	0	42067
10	42067.4	42067.4	42081.4	Gillian	1	0	1	0	0	0	0	0	0	0	0	0	0	0	0	42067
10	42067.4	42067.4	42081.4	Gillian	1	0		0	0	0	0	0	0	0	0	0	0	0	0	42067
10	42067.4	42067.4	42081.4	Gillian	1	1		0	0	0	0	0	0	0	0	0	0	0	0	42067
10	42067.4	42067.4	42081.4	Gillian	1	0	1	0	0	0	0	0	0	0	0	0	0	0	0	42067
10	42067.4	42067.4	42081.4	Gillian	1	1	1	0	0	0	0	0	1	0	0	0	0	0	0	42067
10	42067.4	42067.4	42081.4	Gillian	1	1		0	0	0	0	0	0	0	0	0	0	0	0	42067
10	42067.4	42067.4	42081.4	Gillian	1	1	1	0	0	0	0	0	0	0	0	0	0	0	0	42067
10	42067.4	42067.4	42081.4	Gillian	1	0		0	0	0	0	0	0	0	0	0	0	0	0	42067
10	42067.4	42067.4	42081.4	Gillian	1	1	1	0	0	0	0	0	0	0	1	0	1	0	0	42067
10	42067.4	42067.4	42081.4	Gillian	1	1	1	0	1	0	0	0	0	0	1	0	1	0	1	42067
10	42067.4	42067.4	42081.4	Gillian	1	0	1	0	0	0	0	0	0	0	0	0	0	0	0	42067
10	42067.4	42067.4	42081.4	Gillian	1	1	1	0	0	0	0	0	0	0	0	0	0	0	0	42067
10	42067.4	42067.4	42081.4	Gillian	1	0		0	0	0	0	0	0	0	0	0	0	0	0	42067
10	42067.4	42067.4	42081.4	Gillian	1	1	1	0	0	0	1	0	1	0	0	0	0	0	0	42067
11	42069.3	42069.3	42081.4	Gillian	1	0	1	0	0	0	0	0	0	0	0	0	0	0	0	42069
11	42069.3	42069.3	42081.4	Gillian	1	1	1	0	1	0	1	0	1	0	1	0	1	0	0	42069
11	42069.3	42069.3	42081.4	Gillian	1	1	1	0	0	0	1	0	0	0	0	0	1	0	0	42069
11	42069.3	42069.3	42081.4	Gillian	1	0	1	0	0	0	0	0	0	0	0	0	0	0	0	42069
11	42069.4	42069.4	42081.4	Gillian	1	0	1	0	0	0	0	0	0	0	0	0	0	0	0	42069
11	42069.4	42069.4	42081.4	Gillian	1	0	1	0	0	0	0	0	0	0	0	0	0	0	0	42069
11	42069.4	42069.4	42081.4	Gillian	1	0	1	0	0	0	0	0	0	0	0	0	0	0	0	42069
11	42069.4	42069.4	42081.4	Gillian	1	1	1	0	1	0	0	0	0	0	0	0	1	0	0	42069
11	42069.4	42069.4	42081.4	Gillian	1	1	1	0	0	0	0	0	0	0	0	0	0	0	0	42069
11	42069.4	42069.4	42081.4	Gillian	1	0	1	0	0	0	0	0	0	0	0	0	0	0	0	42069
11	42069.4	42069.4	42081.4	Gillian	1	0	1	0	0	0	0	0	0	0	0	0	0	0	0	42069
11	42069.4	42069.4	42081.4	Gillian	1	0	1	0	0	0	0	0	0	0	0	0	0	0	0	42069
11	42069.4	42069.4	42081.4	Gillian	1	1	1	0	1	0	1	0	0	0	1	1	1	0	1	42069
11	42069.4	42069.4	42081.4	Gillian	1	1	1	0	1	0	1	0	1	0	1	1	0	0	0	42069
11	42069.4	42069.4	42081.4	Gillian	1	0	1	0	0	0	0	0	0	0	0	0	0	0	0	42069
11	42069.4	42069.4	42081.4	Gillian	1	0	1	0	0	0	0	0	0	0	0	0	0	0	0	42069
11	42069.4	42069.4	42081.4	Gillian	1	0	1	0	0	0	0	0	0	0	0	0	0	0	0	42069
11	42069.4	42069.4	42081.4	Gillian	1	0	1	0	0	0	0	0	0	0	0	0	0	0	0	42069
11	42069.4	42069.4	42081.4	Gillian	1	0	1	0	0	0	0	0	0	0	0	0	0	0	0	42069
11	42069.5	42069.5	42081.4	Gillian	1	1	1	1	0	0	1	0	0	0	0	0	0	0	0	42069
11	42069.5	42069.5	42081.4	Gillian	1	0	1	0	0	0	0	0	0	0	0	0	0	0	0	42069
11	42069.6	42069.6	42081.4	Gillian	1	1		0	0	1	0	0	0	0	0	0	0	0	0	42069
11	42069.6	42069.6	42081.4	Gillian	1	0		0	0	0	0	0	0	0	0	0	0	0	0	42069
12	42072.4	42072.4	42081.4	Gillian	1	1	1	0	0	0	1	0	1	0	1	0	1	0	1	42072
12	42072.4	42072.4	42081.4	Gillian	1	1	1	0	0	0	1	0	1	0	0	0	1	0	0	42072
12	42072.4	42072.4	42081.4	Gillian	1	1	1	0	0	0	1	0	1	0	1	0	1	0	0	42072
12	42072.4	42072.4	42081.4	Gillian	1	1	1	0	0	0	0	0	1	0	0	0	1	0	0	42072
12	42072.4	42072.4	42081.4	Gillian	1	1		0	0	0	0	0	0	0	0	0	0	0	0	42072
12	42072.4	42072.4	42081.4	Gillian	1	1	1	0	0	0	0	0	0	0	0	0	0	0	0	42072
12	42072.4	42072.4	42081.4	Gillian	1	1	1	0	1	0	1	0	1	0	1	0	0	0	1	42072
12	42072.4	42072.4	42081.4	Gillian	1	1	1	0	1	0	1	0	0	0	0	0	1	0	0	42072
12	42072.4	42072.4	42081.4	Gillian	1	1	1	0	0	0	0	0	0	0	0	0	0	0	0	42072
12	42072.4	42072.4	42081.4	Gillian	1	1	1	0	0	0	1	0	1	0	1	0	1	0	0	42072
12	42072.4	42072.4	42081.4	Gillian	1	1	1	0	0	0	0	0	0	0	0	0	0	0	0	42072
12	42072.4	42072.4	42081.4	Gillian	1	1	1	0	0	0	1	0	1	0	1	0	1	0	1	42072
12	42072.4	42072.4	42081.4	Gillian	1	0	1	0	0	0	0	0	0	0	0	0	0	0	0	42072
12	42072.5	42072.5	42081.4	Gillian	1	0	1	0	0	0	0	0	0	0	0	0	0	0	0	42072
12	42072.5	42072.5	42081.4	Gillian	1	1	1	0	1	0	1	0	1	0	0	0	0	0	0	42072
12	42072.5	42072.5	42081.4	Gillian	1	1	1	0	1	0	1	0	1	0	1	0	1	0	1	42072
12	42072.5	42072.5	42081.4	Gillian	1	1	1	0	1	0	1	0	1	0	1	0	1	0	1	42072
12	42072.5	42072.5	42081.4	Gillian	1	1	1	0	1	0	1	0	1	0	1	0	1	0	1	42072
12	42072.5	42072.5	42081.4	Gillian	1	0	1	0	0	0	0	0	0	0	0	0	0	0	0	42072
12	42072.5	42072.5	42081.4	Gillian	1	1	1	0	0	0	1	0	0	0	0	0	0	0	0	42072
12	42072.5	42072.5	42081.4	Gillian	1	0	1	0	0	0	0	0	0	0	0	0	0	0	0	42072
12	42072.5	42072.5	42081.4	Gillian	1	1	1	0	0	0	1	0	1	0	0	0	1	0	1	42072
12	42072.5	42072.5	42081.4	Gillian	1	1	1	0	0	0	0	0	0	0	0	0	0	0	0	42072
12	42073.4	42073.4	42081.4	Gillian	1	1	1	0	1	0	1	0	1	0	1	0	1	0	0	42073
12	42073.4	42073.4	42081.4	Gillian	1	1	1	1	0	1	1	0	0	0	1	0	1	0	1	42073
12	42073.4	42073.4	42081.4	Gillian	1	1	1	0	0	0	1	0	0	0	0	0	1	1	0	42073
12	42073.4	42073.4	42081.4	Gillian	1	1	1	0	0	0	0	0	0	0	0	0	0	0	0	42073
12	42073.4	42073.4	42081.4	Gillian	1	1	1	0	0	0	0	0	1	0	0	0	0	0	0	42073
12	42073.4	42073.4	42081.4	Gillian	1	1	1	0	0	0	0	0	0	0	0	0	0	0	0	42073
12	42073.4	42073.4	42081.4	Gillian	1	1	1	0	0	0	1	0	1	0	0	0	0	0	0	42073
12	42073.4	42073.4	42081.4	Gillian	1	1	1	0	1	1	1	0	0	0	1	0	1	0	0	42073
12	42073.4	42073.4	42081.4	Gillian	1	1	1	0	0	0	0	0	0	0	0	0	0	0	0	42073
12	42073.4	42073.4	42081.4	Gillian	1	1	1	0	1	0	1	0	1	0	0	0	1	0	0	42073
12	42073.4	42073.4	42081.4	Gillian	1	1	1	0	0	0	1	0	0	0	0	0	0	0	0	42073
12	42073.4	42073.4	42081.4	Gillian	1	1	1	1	0	0	0	0	0	1	0	0	0	0	0	42073
12	42073.4	42073.4	42081.4	Gillian	1	1	1	0	0	0	1	0	0	0	0	1	0	0	0	42073
12	42073.4	42073.4	42081.4	Gillian	1	1	1	0	0	0	1	0	0	0	0	0	0	0	0	42073
12	42073.4	42073.4	42081.4	Gillian	1	1	1	0	1	0	1	0	1	0	1	0	1	0	0	42073
12	42073.4	42073.5	42081.4	Gillian	1	1	1	0	0	0	1	0	1	0	0	0	0	0	0	42073
12	42073.5	42073.5	42081.4	Gillian	1	1	1	0	0	0	0	0	0	0	0	0	1	0	0	42073
12	42073.5	42073.5	42081.4	Gillian	1	1	1	0	1	0	0	0	0	0	0	1	0	0	0	42073
12	42073.5	42073.5	42081.4	Gillian	1	1	1	1	0	0	1	0	1	1	0	1	0	0	0	42073
13	42075.4	42075.4	42081.4	Gillian	1	1	1	1	1	1	1	0	0	0	0	1	0	0	0	42075
13	42075.4	42075.4	42081.4	Gillian	1	1	1	0	0	0	0	0	0	0	0	0	0	0	0	42075
13	42075.4	42075.4	42081.4	Gillian	1	0	1	0	0	0	0	0	0	0	0	0	0	0	0	42075
13	42075.4	42075.4	42081.4	Gillian	1	1	1	0	0	0	0	0	0	0	0	0	0	0	0	42075
13	42075.4	42075.4	42081.4	Gillian	1	1	1	0	1	0	1	0	0	0	0	0	0	0	0	42075
13	42075.4	42075.4	42081.4	Gillian	1	1	1	0	0	1	1	0	0	0	0	0	0	0	0	42075
13	42075.4	42075.4	42081.4	Gillian	1	1	1	0	0	0	0	0	0	1	0	1	0	0	0	42075
13	42075.4	42075.4	42081.4	Gillian	1	0	1	0	0	0	0	0	0	0	0	0	0	0	0	42075
13	42075.4	42075.4	42081.4	Gillian	1	1	1	0	1	0	1	0	1	0	0	0	0	0	0	42075
13	42075.4	42075.4	42081.4	Gillian	1	0	1	0	0	0	0	0	0	0	0	0	0	0	0	42075
13	42075.4	42075.4	42081.4	Gillian	1	0	1	0	0	0	0	0	0	0	0	0	0	0	0	42075
13	42075.4	42075.4	42081.4	Gillian	1	1	1	0	1	0	1	0	1	0	1	0	1	0	1	42075
13	42075.4	42075.4	42081.4	Gillian	1	0	1	0	0	0	0	0	0	0	0	0	0	0	0	42075
13	42075.5	42075.5	42081.4	Gillian	1	1	1	0	1	0	0	0	0	0	1	0	0	0	0	42075
13	42075.5	42075.5	42081.4	Gillian	1	0	1	0	0	0	0	0	0	0	0	0	0	0	0	42075
13	42075.5	42075.5	42081.4	Gillian	1	1	1	1	0	0	0	0	0	0	1	0	1	0	1	42075
13	42075.5	42075.5	42081.4	Gillian	1	0	1	0	0	0	0	0	0	0	0	0	0	0	0	42075
13	42075.5	42075.5	42081.4	Gillian	1	1	1	0	0	0	0	0	0	1	0	1	0	0	0	42075
13	42075.5	42075.5	42081.4	Gillian	1	0	1	0	0	0	0	0	0	0	0	0	0	0	0	42075
13	42076.4	42076.4	42081.4	Gillian	1	0	1	0	0	0	0	0	0	0	0	0	0	0	0	42076
13	42076.4	42076.4	42081.4	Gillian	1	0	1	0	0	0	0	0	0	0	0	0	0	0	0	42076
13	42076.4	42076.4	42081.4	Gillian	1	1	1	0	1	0	1	0	1	0	1	0	1	0	0	42076
13	42076.4	42076.4	42081.4	Gillian	1	0	1	0	0	0	0	0	0	0	0	0	0	0	0	42076
13	42076.4	42076.4	42081.4	Gillian	1	0	1	0	0	0	0	0	0	0	0	0	0	0	0	42076
13	42076.4	42076.4	42081.4	Gillian	1	0	1	0	0	0	0	0	0	0	0	0	0	0	0	42076
13	42076.4	42076.4	42081.4	Gillian	1	0	1	0	0	0	0	0	0	0	0	0	0	0	0	42076
13	42076.4	42076.4	42081.4	Gillian	1	1	1	0	1	0	1	0	1	0	1	0	0	0	0	42076
13	42076.4	42076.4	42081.4	Gillian	1	1	1	0	1	0	1	0	1	0	0	0	0	0	0	42076
13	42076.4	42076.4	42081.4	Gillian	1	1	1	0	1	0	1	0	1	0	1	0	0	0	0	42076
13	42076.4	42076.4	42081.4	Gillian	1	1	1	0	1	0	1	0	0	0	0	0	0	0	0	42076
13	42076.4	42076.4	42081.4	Gillian	1	0	1	0	0	0	0	0	0	0	0	0	0	0	0	42076
13	42076.4	42076.4	42081.4	Gillian	1	0	1	0	0	0	0	0	0	0	0	0	0	0	0	42076
13	42076.4	42076.4	42081.4	Gillian	1	0	1	0	0	0	0	0	0	0	0	0	0	0	0	42076
13	42076.4	42076.4	42081.4	Gillian	1	1	1	0	0	0	0	0	0	0	0	0	0	0	0	42076
13	42076.4	42076.4	42081.4	Gillian	1	1	1	0	1	0	0	0	0	0	0	0	0	0	0	42076
13	42076.4	42076.4	42081.4	Gillian	1	1	1	1	0	0	0	0	0	0	0	0	0	0	0	42076
13	42076.4	42076.4	42081.4	Gillian	1	1	1	0	1	0	1	0	1	0	1	0	0	0	1	42076
13	42076.4	42076.4	42081.4	Gillian	1	1	1	0	0	0	0	0	0	0	0	0	0	0	0	42076
13	42076.5	42076.5	42081.4	Gillian	1	0	1	0	0	0	0	0	0	0	0	0	0	0	0	42076
11				Gillian	1	1	1	0	1	0	1	0	0	0	0	0	1	0	1	2015-03-05
11				Gillian	1	0	1
11				Gillian	1	0	1
11				Gillian	1	0	1
11				Gillian	1	0	0
11				Gillian	1	1	1
11				Gillian	1	0	1
11				Gillian	1	0	1
11				Gillian	1	0	1
11				Gillian	1	1	1	1	1	0	1	0	1	0	1	0	1	0	0
11				Gillian	1	0	1
11				Gillian	1	1	1	1	0	0	0	0	1	0	1	0	0	0	0
11				Gillian	1	0	1
11				Gillian	1	1	1	0	1	0	1	0	0	0	0	0	1	0	0
11				Gillian	1	0	1
11				Gillian	1	1	0	1	0	0	0	0	0	0	0	0	0	0	0
11				Gillian	1	1	1	0	0	0	0	0	0	0	0	0	1	0	0
11				Gillian	1	1	1	0	0	0	0	0	0	0	0	0	0	0	0
11				Gillian	1	1	1	0	1	0	1	0	1	0	1	0	1	0	0
11				Gillian	1	0	1
11				Gillian	1	0	1
11				Gillian	1	1	1	0	1	0	1	0	1	0	1	0	1	0	1
14	42261.4	42261.4	42262.3		1	1	1	0	0	0	0	0	0	0	0	0	0	0	0	42261
14	42261.4	42261.4	42262.3		1	1	1	0	1	0	0	0	1	0	0	0	1	0	0	42261
14	42261.4	42261.4	42262.3		1	1	1	0	1	1	1	0	1	0	0	0	1	0	0	42261
14	42261.4	42261.4	42262.3		1	1	1	0	1	0	1	0	1	0	0	0	0	0	0	42261
14	42261.4	42261.4	42262.3		1	1	1	0	0	0	1	0	0	0	0	0	1	0	0	42261
14	42261.4	42261.4	42262.3		1	1	1	0	0	0	1	0	0	0	0	0	1	1	0	42261
14	42261.4	42261.4	42262.3		1	1	1	0	0	0	1	0	0	0	0	0	0	0	0	42261
14	42261.4	42261.5	42262.3		1	0	1	0	0	0	0	0	0	0	0	0	0	0	0	42261
14	42261.5	42261.5	42262.3		1	0	1	0	0	0	0	0	0	0	0	0	0	0	0	42261
14	42261.5	42261.5	42262.3		1	1	1	0	1	0	1	0	0	0	0	1	0	0	0	42261
14	42261.5	42261.5	42262.3		1	0	1	0	0	0	0	0	0	0	0	0	0	0	0	42261
14	42261.5	42261.5	42262.3		1	0	1	0	0	0	0	0	0	0	0	0	0	0	0	42261
14	42261.5	42261.5	42262.3		1	0	1	0	0	0	0	0	0	0	0	0	0	0	0	42261
14	42261.5	42261.5	42262.3		1	0	1	0	1	0	1	0	1	0	0	0	1	0	1	42261
14	42261.5	42261.5	42262.3		1	0	1	0	0	0	0	0	0	0	0	0	0	0	0	42261
14	42261.5	42261.5	42262.3		1	0	1	0	0	0	0	0	0	0	0	0	0	0	0	42261
14	42261.5	42261.5	42262.3		1	0	1	0	0	0	0	0	0	0	0	0	0	0	0	42261
14	42261.6	42261.6	42262.3		1	0	1	0	0	0	0	0	0	0	0	0	0	0	0	42261
14	42261.6	42261.6	42262.3		1	1	1	0	1	0	1	0	1	0	0	0	1	0	1	42261
14	42261.6	42261.6	42262.3		1	1	1	0	1	0	1	0	0	0	0	0	1	0	1	42261
14	42261.6	42261.6	42262.3		1	0	1	0	0	0	0	0	0	0	0	0	0	0	0	42261
14	42261.6	42261.6	42262.3		1	1	1	0	0	0	1	0	0	0	0	0	0	0	0	42261
14	42262.4	42262.4	42269.7		1	1	1	0	1	0	1	0	1	0	1	0	0	0	1	42262
14	42262.4	42262.4	42269.7		1	1	1	0	0	0	1	0	1	0	1	0	0	0	0	42262
14	42262.4	42262.4	42269.7		1	0	1	0	0	0	0	0	0	0	0	0	0	0	0	42262
14	42262.4	42262.4	42269.7		1	0	0	0	0	0	0	0	0	0	0	0	0	0	0	42262
14	42262.4	42262.4	42269.7		1	0	1	0	0	0	0	0	0	0	0	0	0	0	0	42262
14	42262.4	42262.4	42269.7		1	1	1	0	0	0	1	0	1	0	0	0	0	0	1	42262
14	42262.4	42262.4	42269.7		1	1	1	0	1	0	1	0	1	0	1	0	0	0	0	42262
14	42262.4	42262.4	42269.7		1	0	1	0	0	0	0	0	0	0	0	0	0	0	0	42262
14	42262.4	42262.4	42269.7		1	0		0	0	0	0	0	0	0	0	0	0	0	0	42262
14	42262.4	42262.4	42269.7		1	1	1	0	0	0	0	0	1	0	1	0	0	0	1	42262
14	42262.4	42262.4	42269.7		1	0	1	0	0	0	0	0	0	0	0	0	0	0	0	42262
14	42262.4	42262.4	42269.7		1	1	1	0	1	0	1	0	1	0	0	0	1	0	1	42262
14	42262.4	42262.4	42269.7		1	0	1	0	0	0	0	0	0	0	0	0	0	0	0	42262
14	42262.4	42262.4	42269.7		1	0	1	0	0	0	0	0	0	0	0	0	0	0	0	42262
14	42262.4	42262.4	42269.7		1	1	1	0	0	0	0	0	0	0	0	0	0	0	0	42262
14	42262.4	42262.4	42269.7		1	0	1	0	0	0	0	0	0	0	0	0	0	0	0	42262
14	42262.4	42262.4	42269.7		1	1	1	0	0	0	0	0	0	0	0	0	0	0	0	42262
14	42262.4	42262.4	42269.7		1	0	1	0	0	0	0	0	0	0	0	0	0	0	0	42262
14	42262.4	42262.5	42269.7		1	0	1	0	0	0	0	0	0	0	0	0	0	0	0	42262
14	42262.5	42262.5	42269.7		1	0	1	0	0	0	0	0	0	0	0	0	0	0	0	42262
14	42262.5	42262.5	42269.7		1	1	1	0	0	0	1	0	1	0	0	0	0	0	1	42262
14	42262.5	42262.5	42269.7		1	0	1	0	0	0	0	0	0	0	0	0	0	0	0	42262
14	42262.6	42262.6	42269.7		1	0	1	0	0	0	0	0	0	0	0	0	0	0	0	42262
14	42262.6	42262.6	42269.7		1	0	1	0	0	0	0	0	0	0	0	0	0	0	0	42262
14	42262.6	42262.6	42269.7		1	0	0	0	0	0	0	0	0	0	0	0	0	0	0	42262
14	42262.6	42262.6	42269.7		1	1	1	0	1	0	1	0	1	0	1	1	1	0	1	42262
14	42262.6	42262.6	42269.7		1	1	1	0	0	0	1	0	1	0	1	0	0	0	0	42262
14	42262.6	42262.6	42269.7		1	0	1	0	0	0	0	0	0	0	0	0	0	0	0	42262
14	42262.6	42262.6	42269.7		1	1	1	0	1	0	1	0	1	0	1	0	0	0	0	42262
14	42262.6	42262.6	42269.7		1	0	1	0	0	0	0	0	0	0	0	0	0	0	0	42262
14	42262.6	42262.6	42269.7		1	0	1	0	0	0	0	0	0	0	0	0	0	0	0	42262
14	42262.6	42262.6	42269.7		1	0	1	0	0	0	0	0	0	0	0	0	0	0	0	42262
14	42262.6	42262.6	42269.7		1	0	1	0	0	0	0	0	0	0	0	0	0	0	0	42262
15	42264.4	42264.4	42269.7		1	0	1	0	0	0	0	0	0	0	0	0	0	0	0	42264
15	42264.4	42264.4	42269.7		1	0	1	0	0	0	0	0	0	0	0	0	0	0	0	42264
15	42264.4	42264.4	42269.7		1	1	1	0	1	0	1	0	1	0	0	0	1	0	0	42264
15	42264.4	42264.4	42269.7		1	1	1	0	1	0	1	0	1	0	1	0	1	0	1	42264
15	42264.4	42264.4	42269.7		1	0	1	0	0	0	0	0	0	0	0	0	0	0	0	42264
15	42264.4	42264.4	42269.7		1	1	1	0	1	0	1	0	1	0	0	0	1	0	0	42264
15	42264.4	42264.4	42269.7		1	0	1	0	0	0	0	0	0	0	0	0	0	0	0	42264
15	42264.4	42264.4	42269.7		1	1	1	0	1	0	1	0	1	0	1	0	0	0	0	42264
15	42264.4	42264.4	42269.7		1	1	1	0	1	0	1	0	1	0	1	0	1	0	1	42264
15	42264.4	42264.4	42269.7		1	1	1	0	1	0	1	0	1	0	0	0	1	0	1	42264
15	42264.4	42264.4	42269.7		1	1	1	0	1	0	1	0	1	0	1	0	1	0	1	42264
15	42264.4	42264.4	42269.7		1	0	1	0	0	0	0	0	0	0	0	0	0	0	0	42264
15	42264.4	42264.4	42269.7		1	1	1	0	1	0	1	0	1	0	1	0	1	0	1	42264
15	42264.4	42264.4	42269.7		1	0	1	0	0	0	0	0	0	0	0	0	0	0	0	42264
15	42264.4	42264.4	42269.7		1	0	1	0	0	0	0	0	0	0	0	0	0	0	0	42264
15	42264.4	42264.4	42269.7		1	0	1	0	0	0	0	0	0	0	0	0	0	0	0	42264
15	42264.4	42264.4	42269.7		1	0	1	0	0	0	0	0	0	0	0	0	0	0	0	42264
15	42264.4	42264.4	42269.7		1	1	1	0	1	0	1	0	1	0	1	0	1	0	1	42264
15	42264.4	42264.4	42269.7		1	0	1	0	0	0	0	0	0	0	0	0	0	0	0	42264
15	42264.4	42264.4	42269.7		1	1	1	0	1	0	1	0	1	0	1	0	1	0	1	42264
15	42264.5	42264.5	42296.7		1	1	1	0	0	0	0	0	0	0	0	0	0	0	0	42264
15	42264.5	42264.5	42269.7		1	1	1	0	1	0	1	0	1	0	1	0	1	0	0	42264
15	42264.5	42264.5	42269.7		1	1	1	0	1	0	1	0	1	0	1	0	1	0	1	42264
15	42264.5	42264.5	42269.7		1	1	1	0	1	0	1	0	1	0	1	0	1	0	0	42264
15	42264.5	42264.5	42269.7		1	0	1	0	0	0	0	0	0	0	0	0	0	0	0	42264
15	42264.6	42264.6	42269.7		1	1	1	0	1	0	1	0	1	0	1	0	1	0	1	42264
15	42264.6	42264.6	42269.7		1	0	1	0	0	0	0	0	0	0	0	0	0	0	0	42264
15	42264.6	42264.6	42269.7		1	0	1	0	0	0	0	0	0	0	0	0	0	0	0	42264
15	42265.4	42265.4	42269.7		1	0	1	0	0	0	0	0	0	0	0	0	0	0	0	42265
15	42265.4	42265.4	42269.7		1	0	1	0	0	0	0	0	0	0	0	0	0	0	0	42265
15	42265.4	42265.4	42269.7		1	1	1	0	1	0	1	0	1	0	1	0	1	0	1	42265
15	42265.4	42265.4	42269.7		1	0	1	0	0	0	0	0	0	0	0	0	0	0	0	42265
15	42265.4	42265.4	42269.7		1	1	1	0	1	0	1	0	1	0	1	0	1	0	0	42265
15	42265.4	42265.4	42269.7		1	0	1	0	0	0	0	0	0	0	0	0	0	0	0	42265
15	42265.4	42265.4	42269.7		1	1	1	0	1	0	1	0	1	0	1	0	1	0	1	42265
15	42265.4	42265.4	42269.7		1	1	1	0	1	0	1	0	1	0	1	0	1	1	1	42265
15	42265.4	42265.4	42269.7		1	0	1	0	0	0	0	0	0	0	0	0	0	0	0	42265
15	42265.4	42265.4	42269.7		1	0	1	0	0	0	0	0	0	0	0	0	0	0	0	42265
15	42265.4	42265.4	42269.7		1	0	1	0	0	0	0	0	0	0	0	0	0	0	0	42265
15	42265.4	42265.4	42269.7		1	0	1	0	0	0	0	0	0	0	0	0	0	0	0	42265
15	42265.4	42265.4	42269.7		1	1	1	0	1	0	1	0	1	1	1	0	1	0	1	42265
15	42265.4	42265.4	42269.7		1	0	1	0	0	0	0	0	0	0	0	0	0	0	0	42265
15	42265.4	42265.4	42269.7		1	0	1	0	0	0	0	0	0	0	0	0	0	0	0	42265
15	42265.4	42265.4	42269.7		1	0	1	0	0	0	0	0	0	0	0	0	0	0	0	42265
15	42265.4	42265.4	42269.7		1	0	1	0	0	0	0	0	0	0	0	0	0	0	0	42265
15	42265.4	42265.4	42269.7		1	0	1	0	0	0	0	0	0	0	0	0	0	0	0	42265
15	42265.4	42265.4	42269.7		1	1	1	0	1	0	1	0	1	0	1	1	1	0	1	42265
15	42265.4	42265.4	42269.7		1	1	1	0	1	0	1	0	1	0	1	0	1	0	1	42265
15	42265.5	42265.5	42269.7		1	0	1	0	0	0	0	0	0	0	0	0	0	0	0	42265
15	42265.5	42265.5	42269.7		1	1	1	0	1	0	1	0	1	0	1	0	1	0	1	42265
15	42265.5	42265.5	42269.7		1	1	1	1	1	1	1	0	1	0	1	0	1	0	1	42265
15	42265.5	42265.5	42269.7		1	1	1	0	1	0	1	0	1	0	1	0	1	0	1	42265
15	42265.5	42265.5	42269.7		1	0	1	0	0	0	0	0	0	0	0	0	0	0	0	42265
15	42265.5	42265.5	42269.7		1	0	1	0	0	0	0	0	0	0	0	0	0	0	0	42265
15	42265.5	42265.5	42269.7		1	1	1	0	1	0	1	0	1	1	1	0	1	1	0	42265
15	42265.5	42265.5	42269.7		1	1	1	0	1	0	1	0	1	0	1	0	1	0	1	42265
15	42265.5	42265.5	42269.7		1	1	1	0	1	0	1	0	1	0	1	0	1	0	1	42265
15	42265.5	42265.5	42269.7		1	1	1	0	1	0	1	0	1	0	1	1	1	0	1	42265
16	42268.4	42268.4	42269.7		1	0	0	0	0	0	0	0	0	0	0	0	0	0	0	42268
16	42268.4	42268.4	42269.7		1	1	1	0	1	0	1	0	1	0	1	0	1	0	1	42268
16	42268.4	42268.4	42269.7		1	0	1	0	0	0	0	0	0	0	0	0	0	0	0	42268
16	42268.4	42268.4	42269.7		1	1	1	0	1	0	1	0	1	0	1	0	0	0	1	42268
16	42268.4	42268.4	42269.7		1	0	1	0	0	0	0	0	0	0	0	0	0	0	0	42268
16	42268.4	42268.4	42269.7		1	1	1	0	1	0	1	0	1	0	1	0	1	0	1	42268
16	42268.4	42268.4	42269.7		1	0	1	0	0	0	0	0	0	0	0	0	0	0	0	42268
16	42268.4	42268.4	42269.7		1	0	1	0	0	0	0	0	0	0	0	0	0	0	0	42268
16	42268.4	42268.4	42269.7		1	1	1	0	1	0	1	0	1	0	1	0	0	0	1	42268
16	42268.4	42268.4	42269.7		1	1	1	0	1	0	1	0	1	0	1	0	0	0	1	42268
16	42268.5	42268.5	42269.7		1	0	1	0	0	0	0	0	0	0	0	0	0	0	0	42268
16	42268.5	42268.5	42269.7		1	0	1	0	0	0	0	0	0	0	0	0	0	0	0	42268
16	42268.5	42268.5	42269.7		1	0	1	0	0	0	0	0	0	0	0	0	0	0	0	42268
16	42268.5	42268.5	42269.7		1	1	1	0	1	0	1	0	1	0	1	0	1	0	1	42268
16	42268.5	42268.5	42269.7		1	1	1	0	1	1	1	0	1	0	1	0	1	0	1	42268
16	42268.5	42268.5	42269.7		1	0	1	0	0	0	0	0	0	0	0	0	0	0	0	42268
16	42268.5	42268.5	42269.7		1	1	1	0	1	0	1	0	1	0	1	0	1	0	1	42268
16	42268.5	42268.5	42269.7		1	1	1	0	1	0	1	0	1	0	1	0	0	0	1	42268
16	42268.5	42268.5	42269.7		1	0	1	0	0	0	0	0	0	0	0	0	0	0	0	42268
16	42268.5	42268.5	42269.7		1	0	1	0	0	0	0	0	0	0	0	0	0	0	0	42268
16	42268.5	42268.5	42269.7		1	0	1	0	0	0	0	0	0	0	0	0	0	0	0	42268
16	42268.5	42268.5	42269.7		1	1	1	0	1	0	1	0	1	0	1	0	0	0	1	42268
16	42268.5	42268.5	42269.7		1	1	1	0	1	0	1	0	1	0	1	0	0	0	1	42268
16	42268.5	42268.5	42269.7		1	1	1	0	1	0	1	0	1	0	1	0	1	0	1	42268
16	42268.5	42268.5	42269.7		1	1	1	0	1	0	1	0	1	0	1	0	1	0	1	42268
16	42268.5	42268.5	42269.7		1	1	1	0	1	0	1	0	1	0	1	0	1	0	1	42268
16	42268.5	42268.5	42269.7		1	0	1	0	0	0	0	0	0	0	0	0	0	0	0	42268
16	42268.5	42268.5	42269.7		1	1	1	0	1	0	1	0	1	0	1	1	1	0	0	42268
16	42268.5	42268.5	42269.7		1	1	1	0	1	0	1	0	1	0	1	0	0	0	1	42268
16	42268.5	42268.5	42269.7		1	0	1	0	0	0	0	0	0	0	0	0	0	0	0	42268
16	42268.6	42268.6	42269.7		1	0	1	0	0	0	0	0	0	0	0	0	0	0	0	42268
16	42268.7	42268.7	42269.7		1	1	1	0	1	0	1	0	0	0	1	0	1	0	1	42268
16	42269.4	42269.4	42269.7		1	0	1	0	0	0	0	0	0	0	0	0	0	0	0	42269
16	42269.4	42269.4	42269.7		1	0	1	0	0	0	0	0	0	0	0	0	0	0	0	42269
16	42269.4	42269.4	42269.7		1	1	1	0	1	0	1	0	1	0	1	0	0	0	1	42269
16	42269.4	42269.4	42269.7		1	0	1	0	0	0	0	0	0	0	0	0	0	0	0	42269
16	42269.4	42269.4	42269.7		1	0	1	0	0	0	0	0	0	0	0	0	0	0	0	42269
16	42269.4	42269.4	42269.7		1	0	1	0	0	0	0	0	0	0	0	0	0	0	0	42269
16	42269.4	42269.4	42269.7		1	1	1	1	1	0	1	0	1	0	1	0	1	0	0	42269
16	42269.4	42269.4	42269.7		1	1	1	0	1	0	1	0	1	0	1	0	1	0	1	42269
16	42269.4	42269.4	42269.7		1	0	1	0	0	0	0	0	0	0	0	0	0	0	0	42269
16	42269.4	42269.4	42269.7		1	1	1	0	1	0	1	0	1	0	1	0	1	0	1	42269
16	42269.4	42269.4	42269.7		1	1	1	0	1	0	1	0	1	0	0	0	1	0	1	42269
16	42269.4	42269.4	42269.7		1	1	1	0	1	0	1	0	1	0	1	0	1	0	1	42269
16	42269.4	42269.4	42269.7		1	1	1	0	1	0	1	0	1	0	1	0	1	0	1	42269
16	42269.4	42269.4	42269.7		1	1	1	0	1	0	1	0	1	0	1	0	1	0	1	42269
16	42269.4	42269.4	42269.7		1	1	1	0	1	0	1	0	1	0	1	0	1	0	1	42269
16	42269.5	42269.5	42269.7		1	0	1	0	0	0	0	0	0	0	0	0	0	0	0	42269
16	42269.5	42269.5	42269.7		1	0	1	0	0	0	0	0	0	0	0	0	0	0	0	42269
16	42269.5	42269.5	42269.7		1	1	1	0	1	0	1	0	1	0	1	0	1	0	1	42269
16	42269.5	42269.5	42269.7		1	0	1	0	0	0	0	0	0	0	0	0	0	0	0	42269
16	42269.5	42269.5	42269.7		1	0	1	0	0	0	0	0	0	0	0	0	0	0	0	42269
16	42269.5	42269.5	42269.7		1	1	1	0	1	1	1	0	1	0	1	0	1	0	1	42269
16	42269.6	42269.6	42269.7		1	1	1	0	0	0	0	0	0	0	0	0	0	0	0	42269
16	42269.6	42269.6	42269.7		1	1		0	0	0	0	0	0	0	0	0	0	0	0	42269
16	42269.6	42269.6	42269.7		1	1	1	0	1	0	1	0	1	0	1	0	1	0	1	42269
16	42269.6	42269.6	42296.7		1	1	1	0	0	0	0	0	0	0	0	0	0	0	0	42269
16	42269.6	42269.6	42269.7		1	1	1	0	1	0	1	0	1	0	1	0	1	0	1	42269
17	42270.4	42270.4	42296.7		1	1	1	0	0	0	0	0	0	0	0	0	0	0	0	42270
17	42270.4	42270.4	42296.7		1	1	1	0	0	0	0	0	0	0	0	0	0	0	0	42270
17	42270.4	42270.4	42296.7		1	0	1	0	0	0	0	0	0	0	0	0	0	0	0	42270
17	42270.4	42270.4	42296.7		1	0	1	0	0	0	0	0	0	0	0	0	0	0	0	42270
17	42270.4	42270.4	42296.7		1	1	1	0	0	0	0	0	0	0	0	0	0	0	0	42270
17	42270.4	42270.4	42296.7		1	0	1	0	0	0	0	0	0	0	0	0	0	0	0	42270
17	42270.4	42270.4	42296.7		1	0	1	0	0	0	0	0	0	0	0	0	0	0	0	42270
17	42270.4	42270.4	42296.7		1	1	1	0	0	0	0	0	0	0	0	0	0	0	0	42270
17	42270.4	42270.4	42296.7		1	1	1	0	0	0	0	0	0	0	0	0	0	0	0	42270
17	42270.4	42270.4	42296.7		1	0	1	0	0	0	0	0	0	0	0	0	0	0	0	42270
17	42270.4	42270.4	42296.7		1	1	1	0	0	0	0	0	0	0	0	0	0	0	0	42270
17	42270.4	42270.4	42296.7		1	0	1	0	0	0	0	0	0	0	0	0	0	0	0	42270
17	42270.4	42270.4	42296.7		1	0	1	0	0	0	0	0	0	0	0	0	0	0	0	42270
17	42270.4	42270.4	42296.7		1	1	1	0	0	0	0	0	0	0	0	0	0	0	0	42270
17	42270.4	42270.4	42296.7		1	1	1	0	0	0	0	0	0	0	0	0	0	0	0	42270
17	42270.4	42270.4	42296.7		1	1	1	0	0	0	0	0	0	0	0	0	0	0	0	42270
17	42270.4	42270.4	42296.7		1	1	1	0	0	0	0	0	0	0	0	0	0	0	0	42270
17	42270.4	42270.4	42296.7		1	0	1	0	0	0	0	0	0	0	0	0	0	0	0	42270
17	42270.4	42270.4	42296.7		1	1	1	0	0	0	0	0	0	0	0	0	0	0	0	42270
17	42270.4	42270.4	42296.7		1	0		0	0	0	0	0	0	0	0	0	0	0	0	42270
17	42270.5	42270.5	42296.7		1	0	1	0	0	0	0	0	0	0	0	0	0	0	0	42270
17	42270.5	42270.5	42296.7		1	0	1	0	0	0	0	0	0	0	0	0	0	0	0	42270
17	42270.5	42270.5	42296.7		1	0	1	0	0	0	0	0	0	0	0	0	0	0	0	42270
17	42270.5	42270.5	42296.7		1	1	1	0	0	0	0	0	0	0	0	0	0	0	0	42270
17	42270.5	42270.5	42296.7		1	0	1	0	0	0	0	0	0	0	0	0	0	0	0	42270
17	42270.5	42270.5	42296.7		1	1	1	0	0	0	0	0	0	0	0	0	0	0	0	42270
17	42270.5	42270.5	42296.7		1	0	1	0	0	0	0	0	0	0	0	0	0	0	0	42270
17	42270.5	42270.5	42296.7		1	1	1	0	0	0	0	0	0	0	0	0	0	0	0	42270
17	42270.6	42270.6	42296.7		1	1	1	0	0	0	0	0	0	0	0	0	0	0	0	42270
17	42270.6	42270.6	42296.7		1	1	1	0	0	0	0	0	0	0	0	0	0	0	0	42270
17	42270.6	42270.6	42296.7		1	1	1	0	0	0	0	0	0	0	0	0	0	0	0	42270
17	42270.6	42270.6	42296.7		1	1	1	0	0	0	0	0	0	0	0	0	0	0	0	42270
17	42270.6	42270.6	42296.7		1	1	1	0	0	0	0	0	0	0	0	0	0	0	0	42270
17	42270.6	42270.6	42296.7		1	1	1	0	0	0	0	0	0	0	0	0	0	0	0	42270
17	42272.4	42272.4	42296.7		1	1	1	0	0	0	0	0	0	0	0	0	0	0	0	42272
17	42272.4	42272.4	42296.7		1	1	1	0	0	0	0	0	0	0	0	0	0	0	0	42272
17	42272.4	42272.4	42296.7		1	0	1	0	0	0	0	0	0	0	0	0	0	0	0	42272
17	42272.4	42272.4	42296.7		1	0	1	0	0	0	0	0	0	0	0	0	0	0	0	42272
17	42272.4	42272.4	42296.7		1	0	0	0	0	0	0	0	0	0	0	0	0	0	0	42272
17	42272.4	42272.4	42296.7		1	0	1	0	0	0	0	0	0	0	0	0	0	0	0	42272
17	42272.4	42272.4	42296.7		1	1	1	0	0	0	0	0	0	0	0	0	0	0	0	42272
17	42272.4	42272.4	42296.7		1	0	1	0	0	0	0	0	0	0	0	0	0	0	0	42272
17	42272.4	42272.4	42296.7		1	1	1	0	0	0	0	0	0	0	0	0	0	0	0	42272
17	42272.4	42272.4	42296.7		1	1	1	0	0	0	0	0	0	0	0	0	0	0	0	42272
17	42272.4	42272.4	42296.7		1	0	1	0	0	0	0	0	0	0	0	0	0	0	0	42272
17	42272.4	42272.4	42296.7		1	0	1	0	0	0	0	0	0	0	0	0	0	0	0	42272
17	42272.4	42272.4	42296.7		1	0	1	0	0	0	0	0	0	0	0	0	0	0	0	42272
17	42272.4	42272.4	42296.7		1	0	1	0	0	0	0	0	0	0	0	0	0	0	0	42272
17	42272.4	42272.4	42296.7		1	0	1	0	0	0	0	0	0	0	0	0	0	0	0	42272
17	42272.4	42272.4	42296.7		1	0	1	0	0	0	0	0	0	0	0	0	0	0	0	42272
17	42272.4	42272.4	42296.7		1	1	1	0	0	0	0	0	0	0	0	0	0	0	0	42272
17	42272.4	42272.4	42296.7		1	0	1	0	0	0	0	0	0	0	0	0	0	0	0	42272
17	42272.4	42272.5	42296.7		1	0	1	0	0	0	0	0	0	0	0	0	0	0	0	42272
17	42272.5	42272.5	42296.7		1	0	1	0	0	0	0	0	0	0	0	0	0	0	0	42272
17	42272.5	42272.5	42296.7		1	0	1	0	0	0	0	0	0	0	0	0	0	0	0	42272
17	42272.5	42272.5	42296.7		1	1	1	0	0	0	0	0	0	0	0	0	0	0	0	42272
17	42272.6	42272.6	42296.7		1	0	1	0	0	0	0	0	0	0	0	0	0	0	0	42272
17	42272.6	42272.6	42296.7		1	0	1	0	0	0	0	0	0	0	0	0	0	0	0	42272
17	42272.6	42272.6	42296.7		1	0	1	0	0	0	0	0	0	0	0	0	0	0	0	42272
17	42272.6	42272.6	42296.7		1	0	1	0	0	0	0	0	0	0	0	0	0	0	0	42272
17	42272.6	42272.6	42296.7		1	1	1	0	0	0	0	0	0	0	0	0	0	0	0	42272
17	42272.6	42272.6	42296.7		1	0	1	0	0	0	0	0	0	0	0	0	0	0	0	42272
18	42275.4	42275.4	42296.7		1	0	1	0	0	0	0	0	0	0	0	0	0	0	0	42275
18	42275.4	42275.4	42296.7		1	1	1	0	0	0	0	0	0	0	0	0	0	0	0	42275
18	42275.4	42275.4	42296.7		1	0	1	0	0	0	0	0	0	0	0	0	0	0	0	42275
18	42275.4	42275.4	42296.7		1	0	1	0	0	0	0	0	0	0	0	0	0	0	0	42275
18	42275.4	42275.4	42296.7		1	0	0	0	0	0	0	0	0	0	0	0	0	0	0	42275
18	42275.4	42275.4	42296.7		1	1	1	0	0	0	0	0	0	0	0	0	0	0	0	42275
18	42275.4	42275.4	42296.7		1	1	1	0	0	0	0	0	0	0	0	0	0	0	0	42275
18	42275.4	42275.4	42296.7		1	1	1	0	0	0	0	0	0	0	0	0	0	0	0	42275
18	42275.4	42275.4	42296.7		1	0	1	0	0	0	0	0	0	0	0	0	0	0	0	42275
18	42275.4	42275.4	42296.7		1	1	1	0	0	0	0	0	0	0	0	0	0	0	0	42275
18	42275.4	42275.4	42296.7		1	1	1	0	0	0	0	0	0	0	0	0	0	0	0	42275
18	42275.4	42275.4	42296.7		1	0	1	0	0	0	0	0	0	0	0	0	0	0	0	42275
18	42275.4	42275.4	42296.7		1	0	1	0	0	0	0	0	0	0	0	0	0	0	0	42275
18	42275.5	42275.5	42296.7		1	0	1	0	0	0	0	0	0	0	0	0	0	0	0	42275
18	42275.5	42275.5	42296.7		1	0	1	0	0	0	0	0	0	0	0	0	0	0	0	42275
18	42275.5	42275.5	42296.7		1	0	1	0	0	0	0	0	0	0	0	0	0	0	0	42275
18	42275.5	42275.5	42296.7		1	1	1	0	0	0	0	0	0	0	0	0	0	0	0	42275
18	42275.5	42275.5	42296.7		1	1	1	0	0	0	0	0	0	0	0	0	0	0	0	42275
18	42275.5	42275.5	42296.7		1	1	1	0	0	0	0	0	0	0	0	0	0	0	0	42275
18	42275.5	42275.5	42296.7		1	1	1	0	0	0	0	0	0	0	0	0	0	0	0	42275
18	42275.5	42275.5	42296.7		1	1	1	0	0	0	0	0	0	0	0	0	0	0	0	42275
18	42275.5	42275.5	42296.7		1	0	1	0	0	0	0	0	0	0	0	0	0	0	0	42275
18	42275.5	42275.5	42296.7		1	0	1	0	0	0	0	0	0	0	0	0	0	0	0	42275
18	42275.5	42275.5	42296.7		1	0	1	0	0	0	0	0	0	0	0	0	0	0	0	42275
18	42275.5	42275.5	42296.7		1	0	1	0	0	0	0	0	0	0	0	0	0	0	0	42275
18	42275.5	42275.5	42296.7		1	0	1	0	0	0	0	0	0	0	0	0	0	0	0	42275
18	42275.5	42275.5	42296.7		1	1	1	0	0	0	0	0	0	0	0	0	0	0	0	42275
18	42275.5	42275.5	42296.7		1	0	1	0	0	0	0	0	0	0	0	0	0	0	0	42275
18	42275.5	42275.5	42296.7		1	0	1	0	0	0	0	0	0	0	0	0	0	0	0	42275
18	42275.5	42275.5	42296.7		1	1	1	0	0	0	0	0	0	0	0	0	0	0	0	42275
18	42275.5	42275.5	42296.7		1	0	1	0	0	0	0	0	0	0	0	0	0	0	0	42275
18	42275.5	42275.5	42296.7		1	1	1	0	0	0	0	0	0	0	0	0	0	0	0	42275
18	42275.5	42275.5	42296.7		1	1	1	0	0	0	0	0	0	0	0	0	0	0	0	42275
18	42275.5	42275.5	42296.7		1	0	0	0	0	0	0	0	0	0	0	0	0	0	0	42275
18	42275.5	42275.5	42296.7		1	0	1	0	0	0	0	0	0	0	0	0	0	0	0	42275
18	42275.5	42275.5	42296.7		1	0	1	0	0	0	0	0	0	0	0	0	0	0	0	42275
18	42275.5	42275.5	42296.7		1	1	1	0	0	0	0	0	0	0	0	0	0	0	0	42275
18	42275.5	42275.5	42296.7		1	0	1	0	0	0	0	0	0	0	0	0	0	0	0	42275
18	42275.5	42275.5	42296.7		1	1	1	0	0	0	0	0	0	0	0	0	0	0	0	42275
18	42275.5	42275.5	42296.7		1	0	1	0	0	0	0	0	0	0	0	0	0	0	0	42275
18	42275.5	42275.5	42296.7		1	1	1	0	0	0	0	0	0	0	0	0	0	0	0	42275
18	42275.5	42275.5	42296.7		1	1	1	0	0	0	0	0	0	0	0	0	0	0	0	42275
18	42275.5	42275.5	42296.7		1	1	1	0	0	0	0	0	0	0	0	0	0	0	0	42275
18	42275.5	42275.5	42296.7		1	0	1	0	0	0	0	0	0	0	0	0	0	0	0	42275
18	42275.5	42275.5	42296.7		1	1	1	0	0	0	0	0	0	0	0	0	0	0	0	42275
18	42276.4	42276.4	42296.7		1	0	1	0	0	0	0	0	0	0	0	0	0	0	0	42276
18	42276.4	42276.4	42296.7		1	1	1	0	0	0	0	0	0	0	0	0	0	0	0	42276
18	42276.4	42276.4	42296.7		1	0	1	0	0	0	0	0	0	0	0	0	0	0	0	42276
18	42276.4	42276.4	42296.7		1	0	1	0	0	0	0	0	0	0	0	0	0	0	0	42276
18	42276.4	42276.4	42296.7		1	1	1	0	0	0	0	0	0	0	0	0	0	0	0	42276
18	42276.4	42276.4	42296.7		1	0	1	0	0	0	0	0	0	0	0	0	0	0	0	42276
18	42276.4	42276.4	42296.7		1	0	1	0	0	0	0	0	0	0	0	0	0	0	0	42276
18	42276.4	42276.4	42296.7		1	1	1	0	0	0	0	0	0	0	0	0	0	0	0	42276
18	42276.4	42276.4	42296.7		1	1	1	0	0	0	0	0	0	0	0	0	0	0	0	42276
18	42276.4	42276.4	42296.7		1	1	1	0	0	0	0	0	0	0	0	0	0	0	0	42276
18	42276.4	42276.4	42296.7		1	0	1	0	0	0	0	0	0	0	0	0	0	0	0	42276
18	42276.4	42276.4	42296.7		1	0	1	0	0	0	0	0	0	0	0	0	0	0	0	42276
18	42276.4	42276.4	42296.7		1	0	1	0	0	0	0	0	0	0	0	0	0	0	0	42276
18	42276.4	42276.4	42296.7		1	0	1	0	0	0	0	0	0	0	0	0	0	0	0	42276
18	42276.4	42276.4	42296.7		1	0	1	0	0	0	0	0	0	0	0	0	0	0	0	42276
18	42276.4	42276.4	42296.7		1	0	1	0	0	0	0	0	0	0	0	0	0	0	0	42276
18	42276.4	42276.4	42296.7		1	1	0	0	0	0	0	0	0	0	0	0	0	0	0	42276
18	42276.4	42276.4	42296.7		1	1	1	0	0	0	0	0	0	0	0	0	0	0	0	42276
18	42276.4	42276.4	42296.7		1	1	1	0	0	0	0	0	0	0	0	0	0	0	0	42276
18	42276.4	42276.4	42296.7		1	0	1	0	0	0	0	0	0	0	0	0	0	0	0	42276
18	42276.4	42276.4	42296.7		1	0	0	0	0	0	0	0	0	0	0	0	0	0	0	42276
18	42276.4	42276.4	42296.7		1	0	0	0	0	0	0	0	0	0	0	0	0	0	0	42276
18	42276.4	42276.4	42296.7		1	0	1	0	0	0	0	0	0	0	0	0	0	0	0	42276
18	42276.4	42276.4	42296.7		1	0	1	0	0	0	0	0	0	0	0	0	0	0	0	42276
18	42276.4	42276.4	42296.7		1	0	1	0	0	0	0	0	0	0	0	0	0	0	0	42276
18	42276.4	42276.4	42296.7		1	0	1	0	0	0	0	0	0	0	0	0	0	0	0	42276
18	42276.4	42276.4	42296.7		1	0	1	0	0	0	0	0	0	0	0	0	0	0	0	42276
18	42276.4	42276.4	42296.7		1	0	0	0	0	0	0	0	0	0	0	0	0	0	0	42276
18	42276.5	42276.5	42296.7		1	0	0	0	0	0	0	0	0	0	0	0	0	0	0	42276
18	42276.5	42276.5	42296.7		1	0	0	0	0	0	0	0	0	0	0	0	0	0	0	42276
18	42276.5	42276.5	42296.7		1	1	1	0	0	0	0	0	0	0	0	0	0	0	0	42276
18	42276.5	42276.5	42296.7		1	1	1	0	0	0	0	0	0	0	0	0	0	0	0	42276
18	42276.5	42276.5	42296.7		1	0	1	0	0	0	0	0	0	0	0	0	0	0	0	42276
18	42276.5	42276.5	42296.7		1	0	1	0	0	0	0	0	0	0	0	0	0	0	0	42276
18	42276.5	42276.5	42296.7		1	1	1	0	0	0	0	0	0	0	0	0	0	0	0	42276
18	42276.5	42276.5	42296.7		1	1	1	0	0	0	0	0	0	0	0	0	0	0	0	42276
18	42276.5	42276.5	42296.7		1	1	1	0	0	0	0	0	0	0	0	0	0	0	0	42276
18	42276.6	42276.6	42296.7		1	1	1	0	0	0	0	0	0	0	0	0	0	0	0	42276
18	42276.6	42276.6	42296.7		1	0	1	0	0	0	0	0	0	0	0	0	0	0	0	42276
18	42276.6	42276.6	42296.7		1	1	1	0	0	0	0	0	0	0	0	0	0	0	0	42276
18	42276.6	42276.6	42296.7		1	1	1	0	0	0	0	0	0	0	0	0	0	0	0	42276
18	42276.6	42276.6	42296.7		1	1	1	0	0	0	0	0	0	0	0	0	0	0	0	42276
18	42276.6	42276.6	42296.7		1	1	1	0	0	0	0	0	0	0	0	0	0	0	0	42276
19	42277.4	42277.4	42296.7		1	1	1	0	0	0	0	0	0	0	0	0	0	0	0	42277
19	42277.4	42277.4	42296.7		1	0	1	0	0	0	0	0	0	0	0	0	0	0	0	42277
19	42277.4	42277.4	42296.7		1	0	1	0	0	0	0	0	0	0	0	0	0	0	0	42277
19	42277.4	42277.4	42296.7		1	0	1	0	0	0	0	0	0	0	0	0	0	0	0	42277
19	42277.4	42277.4	42296.7		1	1	1	0	0	0	0	0	0	0	0	0	0	0	0	42277
19	42277.4	42277.4	42296.7		1	0	1	0	0	0	0	0	0	0	0	0	0	0	0	42277
19	42277.4	42277.4	42296.7		1	0	1	0	0	0	0	0	0	0	0	0	0	0	0	42277
19	42277.4	42277.4	42296.7		1	0	1	0	0	0	0	0	0	0	0	0	0	0	0	42277
19	42277.4	42277.4	42296.7		1	0	1	0	0	0	0	0	0	0	0	0	0	0	0	42277
19	42277.4	42277.4	42296.7		1	0	0	0	0	0	0	0	0	0	0	0	0	0	0	42277
19	42277.4	42277.4	42296.7		1	0	1	0	0	0	0	0	0	0	0	0	0	0	0	42277
19	42277.4	42277.4	42296.7		1	0	1	0	0	0	0	0	0	0	0	0	0	0	0	42277
19	42277.4	42277.4	42296.7		1	0	1	0	0	0	0	0	0	0	0	0	0	0	0	42277
19	42277.4	42277.4	42296.7		1	0	1	0	0	0	0	0	0	0	0	0	0	0	0	42277
19	42277.5	42277.5	42296.7		1	1	1	0	0	0	0	0	0	0	0	0	0	0	0	42277
19	42278.3	42278.3	42296.7		1	0	1	0	0	0	0	0	0	0	0	0	0	0	0	42278
19	42278.3	42278.3	42296.7		1	1	1	0	0	0	0	0	0	0	0	0	0	0	0	42278
19	42278.4	42278.4	42296.7		1	0	1	0	0	0	0	0	0	0	0	0	0	0	0	42278
19	42278.4	42278.4	42296.7		1	1	1	0	0	0	0	0	0	0	0	0	0	0	0	42278
19	42278.4	42278.4	42296.7		1	0	1	0	0	0	0	0	0	0	0	0	0	0	0	42278
19	42278.4	42278.4	42296.7		1	1	1	0	0	0	0	0	0	0	0	0	0	0	0	42278
19	42278.4	42278.4	42296.7		1	0	1	0	0	0	0	0	0	0	0	0	0	0	0	42278
19	42278.4	42278.4	42296.7		1	0	1	0	0	0	0	0	0	0	0	0	0	0	0	42278
19	42278.4	42278.4	42296.7		1	0	1	0	0	0	0	0	0	0	0	0	0	0	0	42278
19	42278.4	42278.4	42296.7		1	1	1	0	0	0	0	0	0	0	0	0	0	0	0	42278
19	42278.4	42278.4	42296.7		1	1	1	0	0	0	0	0	0	0	0	0	0	0	0	42278
19	42278.4	42278.4	42296.7		1	1	1	0	0	0	0	0	0	0	0	0	0	0	0	42278
19	42278.4	42278.4	42296.7		1	0	1	0	0	0	0	0	0	0	0	0	0	0	0	42278
19	42278.4	42278.4	42296.7		1	0	1	0	0	0	0	0	0	0	0	0	0	0	0	42278
19	42278.4	42278.4	42296.7		1	0	1	0	0	0	0	0	0	0	0	0	0	0	0	42278
19	42278.4	42278.4	42296.7		1	0	1	0	0	0	0	0	0	0	0	0	0	0	0	42278
19	42278.4	42278.4	42296.7		1	0	1	0	0	0	0	0	0	0	0	0	0	0	0	42278
19	42278.4	42278.4	42296.7		1	0	1	0	0	0	0	0	0	0	0	0	0	0	0	42278
19	42278.4	42278.4	42296.7		1	1	1	0	0	0	0	0	0	0	0	0	0	0	0	42278
19	42278.4	42278.4	42296.7		1	0	1	0	0	0	0	0	0	0	0	0	0	0	0	42278
19	42278.4	42278.4	42296.7		1	0	1	0	0	0	0	0	0	0	0	0	0	0	0	42278
19	42278.4	42278.4	42296.7		1	1	1	0	0	0	0	0	0	0	0	0	0	0	0	42278
19	42278.4	42278.4	42296.7		1	0	1	0	0	0	0	0	0	0	0	0	0	0	0	42278
19	42278.4	42278.4	42296.7		1	0	1	0	0	0	0	0	0	0	0	0	0	0	0	42278
19	42278.4	42278.4	42296.7		1	0	1	0	0	0	0	0	0	0	0	0	0	0	0	42278
19	42278.4	42278.4	42296.7		1	0	1	0	0	0	0	0	0	0	0	0	0	0	0	42278
19	42278.4	42278.4	42296.7		1	0	1	0	0	0	0	0	0	0	0	0	0	0	0	42278
19	42278.4	42278.4	42296.7		1	0	1	0	0	0	0	0	0	0	0	0	0	0	0	42278
19	42278.4	42278.4	42296.7		1	0	1	0	0	0	0	0	0	0	0	0	0	0	0	42278
19	42278.4	42278.4	42296.7		1	1	1	0	0	0	0	0	0	0	0	0	0	0	0	42278
19	42278.4	42278.4	42296.7		1	1	1	0	0	0	0	0	0	0	0	0	0	0	0	42278
19	42278.5	42278.5	42296.7		1	0	1	0	0	0	0	0	0	0	0	0	0	0	0	42278
20	42279.4	42279.4	42296.7		1	0	1	0	0	0	0	0	0	0	0	0	0	0	0	42279
20	42279.4	42279.4	42296.7		1	1	1	0	0	0	0	0	0	0	0	0	0	0	0	42279
20	42279.4	42279.4	42296.7		1	1	1	0	0	0	0	0	0	0	0	0	0	0	0
20	42279.4	42279.4	42296.7		1	0	1	0	0	0	0	0	0	0	0	0	0	0	0	42279
20	42279.4	42279.4	42296.7		1	0	1	0	0	0	0	0	0	0	0	0	0	0	0	42279
20	42279.4	42279.4	42296.7		1	0	1	0	0	0	0	0	0	0	0	0	0	0	0	42279
20	42279.4	42279.4	42296.7		1	0	1	0	0	0	0	0	0	0	0	0	0	0	0	42279
20	42279.4	42279.4	42296.7		1	1	1	0	0	0	0	0	0	0	0	0	0	0	0	42279
20	42279.4	42279.4	42296.7		1	0	1	0	0	0	0	0	0	0	0	0	0	0	0	42279
20	42279.4	42279.4	42296.7		1	0	1	0	0	0	0	0	0	0	0	0	0	0	0	42279
20	42279.4	42279.4	42296.7		1	0	1	0	0	0	0	0	0	0	0	0	0	0	0	42279
20	42279.4	42279.4	42296.7		1	0	1	0	0	0	0	0	0	0	0	0	0	0	0	42279
20	42279.4	42279.4	42296.7		1	1	1	0	0	0	0	0	0	0	0	0	0	0	0	42279
20	42279.4	42279.4	42296.7		1	0	1	0	0	0	0	0	0	0	0	0	0	0	0	42279
20	42279.4	42279.4	42296.7		1	0	1	0	0	0	0	0	0	0	0	0	0	0	0	42279
20	42279.4	42279.4	42296.7		1	1	1	0	0	0	0	0	0	0	0	0	0	0	0	42279
20	42279.4	42279.4	42296.7		1	1	1	0	0	0	0	0	0	0	0	0	0	0	0	42279
20	42279.4	42279.4	42296.7		1	0	1	0	0	0	0	0	0	0	0	0	0	0	0	42279
20	42279.4	42279.4	42296.7		1	0	1	0	0	0	0	0	0	0	0	0	0	0	0	42279
20	42279.4	42279.4	42296.7		1	0	1	0	0	0	0	0	0	0	0	0	0	0	0	42279
20	42279.4	42279.4	42296.7		1	1	1	0	0	0	0	0	0	0	0	0	0	0	0	42279
20	42279.4	42279.4	42296.7		1	1	1	0	0	0	0	0	0	0	0	0	0	0	0	42279
20	42279.4	42279.4	42296.7		1	1	1	0	0	0	0	0	0	0	0	0	0	0	0	42279
20	42279.4	42279.4	42296.7		1	1	1	0	0	0	0	0	0	0	0	0	0	0	0	42279
20	42279.4	42279.4	42296.7		1	0	1	0	0	0	0	0	0	0	0	0	0	0	0	42279
20	42279.4	42279.4	42296.7		1	0	1	0	0	0	0	0	0	0	0	0	0	0	0	42279
20	42279.4	42279.4	42296.7		1	0	1	0	0	0	0	0	0	0	0	0	0	0	0	42279
20	42279.4	42279.4	42296.7		1	0	1	0	0	0	0	0	0	0	0	0	0	0	0	42279
20	42279.4	42279.4	42296.7		1	0	1	0	0	0	0	0	0	0	0	0	0	0	0	42279
20	42279.4	42279.4	42296.7		1	0	1	0	0	0	0	0	0	0	0	0	0	0	0	42279
20	42279.4	42279.4	42296.7		1	0	1	0	0	0	0	0	0	0	0	0	0	0	0	42279
20	42279.5	42279.5	42296.7		1	0	1	0	0	0	0	0	0	0	0	0	0	0	0	42279
20	42279.5	42279.5	42296.7		1	0	1	0	0	0	0	0	0	0	0	0	0	0	0	42279
20	42282.4	42282.4	42296.7		1	1	1	0	0	0	0	0	0	0	0	0	0	0	0	42282
20	42282.4	42282.4	42296.7		1	1	1	0	0	0	0	0	0	0	0	0	0	0	0	42282
20	42282.4	42282.4	42296.7		1	0	1	0	0	0	0	0	0	0	0	0	0	0	0	42282
20	42282.4	42282.4	42296.7		1	1	1	0	0	0	0	0	0	0	0	0	0	0	0	42282
20	42282.4	42282.4	42296.7		1	1	1	0	0	0	0	0	0	0	0	0	0	0	0	42282
20	42282.4	42282.4	42296.7		1	0	1	0	0	0	0	0	0	0	0	0	0	0	0	42282
20	42282.4	42282.4	42296.7		1	0	1	0	0	0	0	0	0	0	0	0	0	0	0	42282
20	42282.4	42282.4	42296.7		1	0	1	0	0	0	0	0	0	0	0	0	0	0	0	42282
20	42282.4	42282.4	42296.7		1	1	1	0	0	0	0	0	0	0	0	0	0	0	0	42282
20	42282.4	42282.4	42296.7		1	0	1	0	0	0	0	0	0	0	0	0	0	0	0	42282
20	42282.4	42282.4	42296.7		1	1	1	0	0	0	0	0	0	0	0	0	0	0	0	42282
20	42282.4	42282.4	42296.7		1	0	1	0	0	0	0	0	0	0	0	0	0	0	0	42282
20	42282.4	42282.4	42296.7		1	0	1	0	0	0	0	0	0	0	0	0	0	0	0	42282
20	42282.4	42282.4	42296.7		1	1	1	0	0	0	0	0	0	0	0	0	0	0	0	42282
20	42282.4	42282.4	42296.7		1	1	1	0	0	0	0	0	0	0	0	0	0	0	0	42282
20	42282.4	42282.4	42296.7		1	0	1	0	0	0	0	0	0	0	0	0	0	0	0	42282
20	42282.4	42282.4	42296.7		1	0	1	0	0	0	0	0	0	0	0	0	0	0	0	42282
20	42282.4	42282.4	42296.7		1	1	1	0	0	0	0	0	0	0	0	0	0	0	0	42282
20	42282.4	42282.4	42296.7		1	0	1	0	0	0	0	0	0	0	0	0	0	0	0	42282
20	42282.5	42282.5	42296.7		1	0	1	0	0	0	0	0	0	0	0	0	0	0	0	42282
20	42282.5	42282.5	42296.7		1	0	1	0	0	0	0	0	0	0	0	0	0	0	0	42282
20	42282.5	42282.5	42296.7		1	0	1	0	0	0	0	0	0	0	0	0	0	0	0	42282
20	42282.5	42282.5	42296.7		1	0	1	0	0	0	0	0	0	0	0	0	0	0	0	42282
20	42282.5	42282.5	42296.7		1	0	1	0	0	0	0	0	0	0	0	0	0	0	0	42282
20	42282.5	42282.5	42296.7		1	0	1	0	0	0	0	0	0	0	0	0	0	0	0	42282
20	42282.5	42282.5	42296.7		1	0	1	0	0	0	0	0	0	0	0	0	0	0	0	42282
20	42282.5	42282.5	42296.7		1	1	1	0	0	0	0	0	0	0	0	0	0	0	0	42282
20	42282.5	42282.5	42296.7		1	1	1	0	0	0	0	0	0	0	0	0	0	0	0	42282
20	42282.5	42282.5	42296.7		1	0	0	0	0	0	0	0	0	0	0	0	0	0	0	42282
20	42282.5	42282.5	42296.7		0			0	0	0	0	0	0	0	0	0	0	0	0	42282
20	42282.5	42282.5	42296.7		1	1	1	0	0	0	0	0	0	0	0	0	0	0	0	42282
20	42282.5	42282.5	42296.7		1	0	1	0	0	0	0	0	0	0	0	0	0	0	0	42282
20	42282.5	42282.5	42296.7		1	1	1	0	0	0	0	0	0	0	0	0	0	0	0	42282
20	42282.5	42282.5	42296.7		1	1	1	0	0	0	0	0	0	0	0	0	0	0	0	42282
20	42282.5	42282.5	42296.7		1	0	1	0	0	0	0	0	0	0	0	0	0	0	0	42282
20	42282.5	42282.5	42296.7		1	0	0	0	0	0	0	0	0	0	0	0	0	0	0	42282
21	42283.4	42283.4	42296.7		1	1	1	0	0	0	0	0	0	0	0	0	0	0	0	42283
21	42283.4	42283.4	42296.7		1	0	1	0	0	0	0	0	0	0	0	0	0	0	0	42283
21	42283.4	42283.4	42296.7		1	0	1	0	0	0	0	0	0	0	0	0	0	0	0	42283
21	42283.4	42283.4	42296.7		1	0	1	0	0	0	0	0	0	0	0	0	0	0	0	42283
21	42283.4	42283.4	42296.7		1	0	1	0	0	0	0	0	0	0	0	0	0	0	0	42283
21	42283.4	42283.4	42296.7		1	0	1	0	0	0	0	0	0	0	0	0	0	0	0	42283
21	42283.4	42283.4	42296.7		1	0	1	0	0	0	0	0	0	0	0	0	0	0	0	42283
21	42283.4	42283.4	42296.7		1	0	0	0	0	0	0	0	0	0	0	0	0	0	0	42283
21	42283.4	42283.4	42296.7		1	1	0	0	0	0	0	0	0	0	0	0	0	0	0	42283
21	42283.4	42283.4	42296.7		1	0	1	0	0	0	0	0	0	0	0	0	0	0	0	42283
21	42283.4	42283.4	42296.7		1	0	1	0	0	0	0	0	0	0	0	0	0	0	0	42283
21	42283.4	42283.4	42296.7		1	1	1	0	0	0	0	0	0	0	0	0	0	0	0	42283
21	42283.4	42283.4	42296.7		1	0	1	0	0	0	0	0	0	0	0	0	0	0	0	42283
21	42283.4	42283.4	42296.7		1	0	0	0	0	0	0	0	0	0	0	0	0	0	0	42283
21	42283.4	42283.4	42296.7		1	0	0	0	0	0	0	0	0	0	0	0	0	0	0	42283
21	42283.4	42283.4	42296.7		1	1	1	0	0	0	0	0	0	0	0	0	0	0	0	42283
21	42283.4	42283.4	42296.7		1	0	1	0	0	0	0	0	0	0	0	0	0	0	0	42283
21	42283.4	42283.4	42296.7		1	0	1	0	0	0	0	0	0	0	0	0	0	0	0	42283
21	42283.4	42283.4	42296.7		1	0	1	0	0	0	0	0	0	0	0	0	0	0	0	42283
21	42283.4	42283.4	42296.7		1	0	1	0	0	0	0	0	0	0	0	0	0	0	0	42283
21	42283.4	42283.4	42296.7		1	0	1	0	0	0	0	0	0	0	0	0	0	0	0	42283
21	42283.4	42283.4	42296.7		1	0	1	0	0	0	0	0	0	0	0	0	0	0	0	42283
21	42283.4	42283.4	42296.7		1	1	1	0	0	0	0	0	0	0	0	0	0	0	0	42283
21	42283.4	42283.4	42296.7		1	0	1	0	0	0	0	0	0	0	0	0	0	0	0	42283
21	42283.4	42283.4	42296.7		1	0	0	0	0	0	0	0	0	0	0	0	0	0	0	42283
21	42283.4	42283.4	42296.7		1	0	1	0	0	0	0	0	0	0	0	0	0	0	0	42283
21	42283.4	42283.4	42296.7		1	1	1	0	0	0	0	0	0	0	0	0	0	0	0	42283
21	42283.4	42283.4	42296.7		1	0	1	0	0	0	0	0	0	0	0	0	0	0	0	42283
21	42283.4	42283.4	42296.7		1	0	1	0	0	0	0	0	0	0	0	0	0	0	0	42283
21	42283.4	42283.4	42296.7		1	0	1	0	0	0	0	0	0	0	0	0	0	0	0	42283
21	42283.5	42283.5	42296.7		1	0	1	0	0	0	0	0	0	0	0	0	0	0	0	42283
21	42283.5	42283.5	42296.7		1	0	0	0	0	0	0	0	0	0	0	0	0	0	0	42283
21	42283.5	42283.5	42296.7		1	0	1	0	0	0	0	0	0	0	0	0	0	0	0	42283
21	42283.5	42283.5	42296.7		1	0	0	0	0	0	0	0	0	0	0	0	0	0	0	42283
21	42283.6	42283.6	42296.7		1	1	1	0	0	0	0	0	0	0	0	0	0	0	0	42283
21	42283.6	42283.6	42296.7		1	0	1	0	0	0	0	0	0	0	0	0	0	0	0	42283
21	42283.6	42283.6	42296.7		1	1	1	0	0	0	0	0	0	0	0	0	0	0	0	42283
21	42283.6	42283.6	42296.7		1	0	1	0	0	0	0	0	0	0	0	0	0	0	0	42283
21	42283.6	42283.6	42296.7		1	0	1	0	0	0	0	0	0	0	0	0	0	0	0	42283
21	42283.6	42283.6	42296.7		1	1	1	0	0	0	0	0	0	0	0	0	0	0	0	42283
21	42283.6	42283.6	42296.7		1	1	1	0	0	0	0	0	0	0	0	0	0	0	0	42283
21	42284.3	42284.3	42297.6		1	0	1	0	0	0	0	0	0	0	0	0	0	0	0	42284
21	42284.3	42284.3	42297.6		1	0	1	0	0	0	0	0	0	0	0	0	0	0	0	42284
21	42284.3	42284.3	42297.6		1	1	1	0	1	0	1	0	1	0	1	0	1	0	1	42284
21	42284.3	42284.3	42297.6		1	0	0	0	0	0	0	0	0	0	0	0	0	0	0	42284
21	42284.3	42284.3	42297.6		1	0	1	0	0	0	0	0	0	0	0	0	0	0	0	42284
21	42284.3	42284.3	42297.6		1	0	0	0	0	0	0	0	0	0	0	0	0	0	0	42284
21	42284.3	42284.3	42297.6		1	0	1	0	0	0	0	0	0	0	0	0	0	0	0	42284
21	42284.3	42284.3	42297.6		1	0	1	0	0	0	0	0	0	0	0	0	0	0	0	42284
21	42284.4	42284.4	42297.6		1	1	1	0	1	0	1	0	1	0	1	0	1	0	1	42284
21	42284.4	42284.4	42297.6		1	1	1	0	1	0	1	0	1	0	0	0	0	0	1	42284
21	42284.4	42284.4	42297.6		1	0	1	0	0	0	0	0	0	0	0	0	0	0	0	42284
21	42284.4	42284.4	42297.6		1	1	1	0	1	0	1	0	1	0	1	0	1	0	1	42284
21	42284.4	42284.4	42297.6		1	1	1	0	0	0	0	0	0	0	0	0	1	0	0	42284
21	42284.4	42284.4	42297.6		1	1	1	0	1	0	1	0	1	0	1	0	1	0	1	42284
21	42284.4	42284.4	42297.6		1	1	1	0	1	0	1	0	1	0	1	0	1	0	1	42284
21	42284.4	42284.4	42297.6		1	1	1	0	1	0	1	0	0	0	1	0	1	0	1	42284
21	42284.4	42284.4	42297.6		1	0	1	0	0	0	0	0	0	0	0	0	0	0	0	42284
21	42284.4	42284.4	42297.6		1	1	1	0	1	0	1	0	1	0	1	0	1	0	1	42284
21	42284.4	42284.4	42297.6		1	0	1	0	0	0	0	0	0	0	0	0	0	0	0	42284
21	42284.4	42284.4	42297.6		1	0	1	0	0	0	0	0	0	0	0	0	0	0	0	42284
21	42284.4	42284.4	42297.6		1	0	1	0	0	0	0	0	0	0	0	0	0	0	0	42284
21	42284.4	42284.4	42297.6		1	1	1	0	1	0	1	0	1	0	0	0	0	0	1	42284
21	42284.4	42284.4	42297.6		1	0	1	0	0	0	0	0	0	0	0	0	0	0	0	42284
21	42284.4	42284.4	42297.6		1	1	1	1	0	0	0	0	0	0	0	0	0	0	0	42284
21	42284.4	42284.4	42297.6		1	1	1	0	1	0	1	0	1	0	1	0	0	0	1	42284
21	42284.4	42284.4	42297.6		1	0	1	0	0	0	0	0	0	0	0	0	0	0	0	42284
21	42284.4	42284.4	42297.6		1	1	1	0	1	0	1	0	1	0	1	0	1	0	1	42284
21	42284.4	42284.4	42297.6		1	0	1	0	0	0	0	0	0	0	0	0	0	0	0	42284
21	42284.4	42284.4	42297.6		1	1	1	0	1	0	1	0	1	0	1	0	1	0	1	42284
21	42284.4	42284.4	42297.6		1	1	1	0	1	0	1	0	1	1	1	0	1	0	1	42284
21	42284.4	42284.4	42297.6		1	0	1	0	0	0	0	0	0	0	0	0	0	0	0	42284
21	42284.4	42284.4	42297.6		1	0	1	0	0	0	0	0	0	0	0	0	0	0	0	42284
21	42284.4	42284.4	42297.6		1	0	0	0	0	0	0	0	0	0	0	0	0	0	0	42284
21	42284.4	42284.4	42297.6		1	1	1	0	0	0	0	0	0	0	0	0	0	0	0	42284
21	42284.4	42284.4	42297.6		1	1	0	0	0	0	0	0	0	0	0	0	0	0	0	42284
21	42284.4	42284.4	42297.6		1	0	0	0	0	0	0	0	0	0	0	0	0	0	0	42284
21	42284.4	42284.4	42297.6		1	1	1	0	1	0	1	0	1	0	1	0	0	0	1	42284
22	42285.4	42285.4	42297.6		1	1	1	0	1	0	1	0	1	0	1	0	1	0	1	42285
22	42285.4	42285.4	42297.6		1	0	1	0	0	0	0	0	0	0	0	0	0	0	0	42285
22	42285.4	42285.4	42297.6		1	1	1	0	1	0	1	0	1	0	1	0	1	0	1	42285
22	42285.4	42285.4	42297.6		1	0	1	0	0	0	0	0	0	0	0	0	0	0	0	42285
22	42285.4	42285.4	42297.6		1	1	1	0	1	0	1	0	1	0	0	0	1	0	1	42285
22	42285.4	42285.4	42297.6		1	0	1	0	0	0	0	0	0	0	0	0	0	0	0	42285
22	42285.4	42285.4	42297.6		1	1	1	0	1	0	1	0	1	0	1	0	1	0	1	42285
22	42285.4	42285.4	42297.6		1	0	1	0	0	0	0	0	0	0	0	0	0	0	0	42285
22	42285.5	42285.5	42297.6		1	0	1	0	0	0	0	0	0	0	0	0	0	0	0	42285
22	42285.5	42285.5	42297.6		1	1	1	0	1	0	1	0	1	0	1	0	1	0	0	42285
22	42285.5	42285.5	42297.6		1	1	1	0	1	0	1	0	0	0	1	0	0	0	1	42285
23	42296.3	42296.3	42297.6		1	1	0	0	0	0	0	0	0	0	0	0	0	0	0	42296
23	42296.3	42296.3	42297.6		1	0	1	0	0	0	0	0	0	0	0	0	0	0	0	42296
23	42296.3	42296.3	42297.6		1	0	1	0	0	0	0	0	0	0	0	0	0	0	0	42296
23	42296.3	42296.3	42297.6		1	1	1	0	0	0	0	0	0	0	0	0	0	0	0	42296
23	42296.3	42296.3	42297.6		1	1	1	0	1	0	1	0	0	0	0	0	1	0	1	42296
23	42296.3	42296.3	42297.6		1	0	0	0	0	0	0	0	0	0	0	0	0	0	0	42296
23	42296.3	42296.3	42297.6		1	1	0	0	0	0	0	0	0	0	0	0	0	0	0	42296
23	42296.3	42296.3	42297.6		1	1	0	0	0	0	0	0	0	0	0	0	0	0	0	42296
23	42296.3	42296.3	42297.6		1	0	1	0	0	0	0	0	0	0	0	0	0	0	0	42296
23	42296.3	42296.3	42297.6		1	1	1	0	1	0	0	0	0	0	1	1	1	0	1	42296
23	42296.3	42296.3	42297.6		1	0	0	0	0	0	0	0	0	0	0	0	0	0	0	42296
23	42296.4	42296.4	42297.6		1	1	0	0	0	0	0	0	0	0	0	0	0	0	0	42296
23	42296.4	42296.4	42297.6		1	1	1	0	0	0	0	0	0	0	0	0	0	0	0	42296
23	42296.4	42296.4	42297.6		1	1	1	0	1	0	1	0	1	0	1	0	1	0	1	42296
23	42296.4	42296.4	42297.6		1	0	1	0	0	0	0	0	0	0	0	0	0	0	0	42296
23	42296.4	42296.4	42297.6		1	0	0	0	0	0	0	0	0	0	0	0	0	0	0	42296
23	42296.4	42296.4	42297.6		1	0	0	0	0	0	0	0	0	0	0	0	0	0	0	42296
23	42296.4	42296.4	42297.6		1	1	1	0	0	0	1	0	0	0	0	0	0	0	0	42296
23	42296.4	42296.4	42297.6		1	0	0	0	0	0	0	0	0	0	0	0	0	0	0	42296
23	42296.4	42296.4	42297.6		1	0	1	0	0	0	0	0	0	0	0	0	0	0	0	42296
23	42296.4	42296.4	42297.6		1	0	1	0	0	0	0	0	0	0	0	0	0	0	0	42296
23	42296.4	42296.4	42297.6		1	1	1	0	0	0	1	0	0	0	1	0	0	0	0	42296
23	42296.4	42296.4	42297.6		1	1	0	0	0	0	0	0	0	0	0	0	0	0	0	42296
23	42296.4	42296.4	42297.6		1	1	1	0	1	0	1	0	0	0	0	0	0	0	0	42296
23	42296.4	42296.4	42297.6		1	0	0	0	0	0	0	0	0	0	0	0	0	0	0	42296
23	42296.4	42296.4	42297.6		1	1	1	0	1	0	1	0	0	0	0	0	1	0	1	42296
23	42296.4	42296.4	42297.6		1	0	0	0	0	0	0	0	0	0	0	0	0	0	0	42296
23	42296.4	42296.4	42297.6		1	1	1	0	0	0	1	0	0	0	1	0	0	0	1	42296
23	42296.4	42296.4	42297.6		1	0	0	0	0	0	0	0	0	0	0	0	0	0	0	42296
23	42296.4	42296.4	42297.6		1	0	0	0	0	0	0	0	0	0	0	0	0	0	0	42296
23	42296.5	42296.5	42297.6		1	0	1	0	0	0	0	0	0	0	0	0	0	0	0	42296
23	42296.5	42296.6	42297.6		1	1	1	0	0	1	1	0	0	0	0	0	0	0	1	42296
23	42296.6	42296.6	42297.6		1	0	1	0	0	0	0	0	0	0	0	0	0	0	0	42296
23	42297.3	42297.3	42297.6		1	0	1	0	0	0	0	0	0	0	0	0	0	0	0	42297
23	42297.3	42297.3	42297.6		1	1	1	0	1	0	1	0	1	0	1	0	1	0	1	42297
23	42297.3	42297.3	42297.6		1	0	1	0	0	0	0	0	0	0	0	0	0	0	0	42297
23	42297.3	42297.3	42297.6		1	0	1	0	0	0	0	0	0	0	0	0	0	0	0	42297
23	42297.3	42297.3	42297.6		1	0	0	0	0	0	0	0	0	0	0	0	0	0	0	42297
23	42297.4	42297.4	42297.6		1	1	1	0	0	0	1	0	0	0	0	0	1	0	1	42297
23	42297.4	42297.4	42297.6		1	1	1	0	1	0	1	0	1	0	1	0	1	0	1	42297
23	42297.4	42297.4	42297.6		1	1	1	0	1	0	1	0	1	0	1	0	1	0	1	42297
23	42297.4	42297.4	42297.6		1	1	1	0	0	0	1	0	0	0	0	0	1	0	1	42297
23	42297.4	42297.4	42297.6		1	0	1	0	0	0	0	0	0	0	0	0	0	0	0	42297
23	42297.4	42297.4	42297.6		1	1	1	0	1	1	1	0	1	0	0	0	1	0	1	42297
23	42297.4	42297.4	42297.6		1	1	1	0	0	0	1	0	0	0	0	0	1	0	1	42297
23	42297.4	42297.4	42297.6		1	0	1	0	0	0	0	0	0	0	0	0	0	0	0	42297
23	42297.4	42297.4	42297.6		1	0	1	0	0	0	0	0	0	0	0	0	0	0	0	42297
23	42297.5	42297.5	42297.6		1	0	1	0	0	0	0	0	0	0	0	0	0	0	0	42297
23	42297.5	42297.5	42297.6		1	0	1	0	0	0	0	0	0	0	0	0	0	0	0	42297
23	42297.5	42297.5	42297.6		1	0	1	0	0	0	0	0	0	0	0	0	0	0	0	42297
23	42297.5	42297.5	42297.6		1	0	1	0	0	0	0	0	0	0	0	0	0	0	0	42297
23	42297.5	42297.5	42297.6		1	0	1	0	0	0	0	0	0	0	0	0	0	0	0	42297
24	42298.4	42298.4	42311.4		1	0	0	0	0	0	0	0	0	0	0	0	0	0	0	42298
24	42298.4	42298.4	42311.4		1	0	1	0	0	0	0	0	0	0	0	0	0	0	0	42298
24	42298.4	42298.4	42311.4		1	0	1	0	0	0	0	0	0	0	0	0	0	0	0	42298
24	42298.4	42298.4	42311.4		1	1	0	0	0	0	0	0	0	0	0	0	0	0	0	42298
24	42298.4	42298.4	42311.4		1	0	1	0	0	0	0	0	0	0	0	0	0	0	0	42298
24	42298.4	42298.4	42311.4		1	1	0	0	0	0	0	0	0	0	0	0	0	0	0	42298
24	42298.4	42298.4	42311.4		1	0	0	0	0	0	0	0	0	0	0	0	0	0	0	42298
24	42298.4	42298.4	42311.4		1	1	1	0	0	0	0	0	0	0	0	0	0	0	0	42298
24	42298.4	42298.4	42311.4		1	1	0	0	0	0	0	0	0	0	0	0	0	0	0	42298
24	42298.4	42298.4	42311.4		1	0	0	0	0	0	0	0	0	0	0	0	0	0	0	42298
24	42298.4	42298.4	42311.4		1	0	0	0	0	0	0	0	0	0	0	0	0	0	0	42298
24	42298.4	42298.4	42311.4		1	0	1	0	0	0	0	0	0	0	0	0	0	0	0	42298
24	42298.4	42298.4	42311.4		1	0	1	0	0	0	0	0	0	0	0	0	0	0	0	42298
24	42298.4	42298.4	42311.4		1	0	1	0	0	0	0	0	0	0	0	0	0	0	0	42298
24	42298.4	42298.4	42311.4		1	0	1	0	0	0	0	0	0	0	0	0	0	0	0	42298
24	42298.4	42298.4	42311.4		1	0	1	0	0	0	0	0	0	0	0	0	0	0	0	42298
24	42298.4	42298.4	42311.4		1	1	1	0	0	0	1	0	0	0	1	0	0	0	0	42298
24	42298.4	42298.4	42311.4		1	1	0	0	0	0	0	0	0	0	0	1	0	0	0	42298
24	42298.4	42298.4	42311.4		1	0	1	0	0	0	0	0	0	0	0	0	0	0	0	42298
24	42299.4	42299.4	42311.4		1	1	1	0	0	0	1	0	0	0	1	0	0	0	1	42299
24	42299.4	42299.4	42311.4		1	0	0	0	0	0	0	0	0	0	0	0	0	0	0	42299
24	42299.4	42299.4	42311.4		1	1	1	0	1	0	1	0	1	0	1	0	1	0	1	42299
24	42299.4	42299.4	42311.4		1	1	1	0	1	0	1	0	1	0	1	0	1	0	0	42299
24	42299.4	42299.4	42311.4		1	1	0	0	0	0	0	0	0	0	0	0	0	0	0	42299
24	42299.4	42299.4	42311.4		1	0	1	0	0	0	0	0	0	0	0	0	0	0	0	42299
24	42299.4	42299.4	42311.4		1	1	1	0	0	0	1	0	1	0	1	0	1	0	1	42299
24	42299.4	42299.4	42311.4		1	1	1	0	0	1	0	0	0	0	0	0	0	0	0	42299
24	42299.4	42299.4	42311.4		1	0	0	0	0	0	0	0	0	0	0	0	0	0	0	42299
24	42299.4	42299.4	42311.4		1	0	1	0	0	0	0	0	0	0	0	0	0	0	0	42299
24	42299.4	42299.4	42311.4		1	0	1	0	0	0	0	0	0	0	0	0	0	0	0	42299
24	42299.4	42299.4	42311.4		1	0	1	0	0	0	0	0	0	0	0	0	0	0	0	42299
24	42299.4	42299.4	42311.4		1	0	1	0	0	0	0	0	0	0	0	0	0	0	0	42299
24	42299.4	42299.4	42311.4		1	0	1	0	0	0	0	0	0	0	0	0	0	0	0	42299
24	42299.4	42299.4	42311.4		1	0	1	0	0	0	0	0	0	0	0	0	0	0	0	42299
24	42299.5	42299.5	42311.4		1	0	0	0	0	0	0	0	0	0	0	0	0	0	0	42299
24	42299.5	42299.5	42311.4		1	1	0	0	0	0	0	0	0	0	0	0	0	0	0	42299
24	42299.5	42299.5	42311.4		1	1	0	0	0	0	0	0	0	0	0	0	0	0	0	42299
24	42299.5	42299.5	42311.4		1	1	1	1	0	1	1	0	0	0	1	0	0	0	1	42299
24	42299.5	42299.5	42311.4		1	0	0	0	0	0	0	0	0	0	0	0	0	0	0	42299
25	42300.3	42300.3	42311.4		1	1	1	0	0	0	0	0	0	0	0	0	0	0	0	42300
25	42300.3	42300.3	42311.4		1	0	1	0	0	0	0	0	0	0	0	0	0	0	0	42300
25	42300.3	42300.3	42311.4		1	1	1	0	1	0	1	0	1	0	0	0	0	0	0	42300
25	42300.3	42300.3	42311.4		1	0	1	0	0	0	0	0	0	0	0	0	0	0	0	42300
25	42300.3	42300.3	42311.4		1	0	1	0	0	0	0	0	0	0	0	0	0	0	0	42300
25	42300.3	42300.3	42311.4		1	0	1	0	0	0	0	0	0	0	0	0	0	0	0	42300
25	42300.3	42300.3	42311.4		1	0	0	0	0	0	0	0	0	0	0	0	0	0	0	42300
25	42300.3	42300.3	42311.4		1	0	1	0	0	0	0	0	0	0	0	0	0	0	0	42300
25	42300.3	42300.3	42311.4		1	1	1	0	1	0	1	0	1	0	0	0	1	0	1	42300
25	42300.3	42300.3	42311.4		1	0	1	0	0	0	0	0	0	0	0	0	0	0	0	42300
25	42300.4	42300.4	42311.4		1	0	1	0	0	0	0	0	0	0	0	0	0	0	0	42300
25	42300.4	42300.4	42311.4		1	0	1	0	0	0	0	0	0	0	0	0	0	0	0	42300
25	42300.4	42300.4	42311.4		1	0	1	0	0	0	0	0	0	0	0	0	0	0	0	42300
25	42300.4	42300.4	42311.4		1	1	1	0	0	0	0	0	1	0	0	0	0	0	0	42300
25	42300.4	42300.4	42311.4		1	1	1	0	1	0	1	0	1	0	0	0	1	0	1	42300
25	42300.6	42300.6	42311.4		1	1	1	0	1	0	1	0	1	0	1	0	1	0	1	42300
25	42303.3	42303.3	42311.4		1	0	0	0	0	0	0	0	0	0	0	0	0	0	0	42303
25	42303.3	42303.3	42311.4		1	0	1	0	0	0	0	0	0	0	0	0	0	0	0	42303
25	42303.3	42303.3	42311.4		1	0	1	0	0	0	0	0	0	0	0	0	0	0	0	42303
25	42303.3	42303.3	42311.4		1	0	1	0	0	0	0	0	0	0	0	0	0	0	0	42303
25	42303.3	42303.3	42311.4		1	1	1	0	1	0	1	0	1	0	1	0	1	0	1	42303
25	42303.3	42303.3	42311.4		1	0	1	0	0	0	0	0	0	0	0	0	0	0	0	42303
25	42303.3	42303.3	42311.4		1	0	0	0	0	0	0	0	0	0	0	0	0	0	0	42303
25	42303.3	42303.3	42311.4		1	0	1	0	0	0	0	0	0	0	0	0	0	0	0	42303
25	42303.3	42303.3	42311.4		1	0	1	0	0	0	0	0	0	0	0	0	0	0	0	42303
25	42303.3	42303.3	42311.4		1	0	1	0	0	0	0	0	0	0	0	0	0	0	0	42303
25	42303.3	42303.3	42311.4		1	1	0	0	0	0	0	0	0	0	0	0	0	1	0	42303
25	42303.3	42303.3	42311.4		1	0	1	0	0	0	0	0	0	0	0	0	0	0	0	42303
25	42303.3	42303.3	42311.4		1	0	1	0	0	0	0	0	0	0	0	0	0	0	0	42303
25	42303.3	42303.3	42311.4		1	0	1	0	0	0	0	0	0	0	0	0	0	0	0	42303
25	42303.4	42303.4	42311.4		1	1	1	0	1	0	1	0	1	0	1	0	1	0	1	42303
25	42303.4	42303.4	42311.4		1	1	1	0	1	0	1	0	1	0	1	0	1	0	1	42303
25	42303.4	42303.4	42311.4		1	1	1	0	0	0	1	0	0	0	0	0	0	0	0	42303
25	42303.4	42303.4	42311.4		1	1	1	0	0	0	1	0	1	0	0	0	0	1	0	42303
25	42303.4	42303.4	42311.4		1	1	1	0	1	0	1	0	1	0	0	0	1	0	1	42303
25	42303.4	42303.4	42311.4		1	1	1	0	1	0	1	0	1	0	1	0	1	0	1	42303
25	42303.4	42303.4	42311.4		1	1	1	0	1	0	1	0	1	0	0	0	1	0	1	42303
25	42303.4	42303.4	42311.4		1	0	1	0	0	0	0	0	0	0	0	0	0	0	0	42303
25	42303.4	42303.4	42311.4		1	0	1	0	0	0	0	0	0	0	0	0	0	0	0	42303
25	42303.4	42303.4	42311.4		1	0	1	0	0	0	0	0	0	0	0	0	0	0	0	42303
25	42303.4	42303.4	42311.4		1	0	1	0	0	0	0	0	0	0	0	0	0	0	0	42303
25	42303.4	42303.4	42311.4		1	1	1	0	1	0	1	0	1	0	0	0	0	0	1	42303
25	42303.4	42303.4	42311.4		1	0	1	0	0	0	0	0	0	0	0	0	0	0	0	42303
25	42303.5	42303.5	42311.4		1	0	1	0	0	0	0	0	0	0	0	0	0	0	0	42303
25	42303.5	42303.5	42311.4		1	1	1	0	0	0	0	0	0	0	1	0	1	1	0	42303
25	42303.5	42303.5	42311.4		1	1	1	0	1	0	1	0	1	0	1	1	1	0	1	42303
25	42303.6	42303.6	42311.4		1	0	1	0	0	0	0	0	0	0	0	0	0	0	0	42303
26	42304.4	42304.4	42311.4		1	0	0	0	0	0	0	0	0	0	0	0	0	0	0	42304
26	42304.4	42304.4	42311.4		1	0	0	0	0	0	0	0	0	0	0	0	0	0	0	42304
26	42304.4	42304.4	42311.4		1	0	0	0	0	0	0	0	0	0	0	0	0	0	0	42304
26	42304.4	42304.4	42311.4		1	0	0	0	0	0	0	0	0	0	0	0	0	0	0	42304
26	42304.4	42304.4	42311.4		1	0	0	0	0	0	0	0	0	0	0	0	0	0	0	42304
26	42304.4	42304.4	42311.4		1	1	0	1	0	0	0	0	0	0	0	0	0	0	0	42304
26	42304.4	42304.4	42311.4		1	1	1	0	1	0	1	0	1	0	0	0	0	0	1	42304
26	42304.4	42304.4	42311.4		1	1	1	0	1	0	1	0	1	0	0	0	0	0	1	42304
26	42304.4	42304.4	42311.4		1	1	1	0	1	0	1	0	1	0	1	0	1	0	1	42304
26	42304.4	42304.4	42311.4		1	1	1	0	1	0	0	0	1	0	0	0	1	0	1	42304
26	42304.4	42304.4	42311.4		1	0	1	0	0	0	0	0	0	0	0	0	0	0	0	42304
26	42304.4	42304.4	42311.4		1	1	0	0	0	0	0	0	0	0	0	0	0	0	0	42304
26	42304.4	42304.4	42311.4		1	1	1	0	1	0	1	0	1	0	1	0	0	0	1	42304
26	42304.4	42304.4	42311.4		1	1	1	0	1	0	1	0	1	0	1	0	0	0	1	42304
26	42304.4	42304.4	42311.4		1	1	0	0	0	1	0	0	0	0	0	0	0	0	0	42304
26	42304.4	42304.4	42311.4		1	0	0	0	0	0	0	0	0	0	0	0	0	0	0	42304
26	42304.4	42304.4	42311.4		1	1	1	0	1	0	1	0	0	0	0	0	0	0	0	42304
26	42305.3	42305.3	42311.4		1	0	0	0	0	0	0	0	0	0	0	0	0	0	0	42305
26	42305.3	42305.3	42311.4		1	0	1	0	0	0	0	0	0	0	0	0	0	0	0	42305
26	42305.3	42305.3	42311.4		1	0	1	0	0	0	0	0	0	0	0	0	0	0	0	42305
26	42305.3	42305.3	42311.4		1	0	1	0	0	0	0	0	0	0	0	0	0	0	0	42305
26	42305.3	42305.3	42311.4		1	0	1	0	0	0	0	0	0	0	0	0	0	0	0	42305
26	42305.3	42305.3	42311.4		1	1	1	0	0	0	1	0	1	0	0	0	0	0	1	42305
26	42305.3	42305.3	42311.4		1	0	1	0	0	0	0	0	0	0	0	0	0	0	0	42305
26	42305.3	42305.3	42311.4		1	0	1	0	0	0	0	0	0	0	0	0	0	0	0	42305
26	42305.3	42305.3	42311.4		1	1	1	0	1	1	1	0	0	0	1	0	1	0	0	42305
26	42305.3	42305.3	42311.4		1	1	1	0	1	1	0	0	1	0	1	0	1	0	1	42305
26	42305.4	42305.4	42311.4		1	1	1	0	0	0	1	0	0	0	0	0	0	0	1	42305
26	42305.4	42305.4	42311.4		1	1	1	0	1	0	1	0	1	0	0	0	0	0	1	42305
26	42305.4	42305.4	42311.4		1	1	0	0	0	0	0	0	0	0	0	0	0	0	0	42305
26	42305.4	42305.4	42311.4		1	1	1	0	0	0	0	0	0	0	0	0	0	0	0	42305
26	42305.4	42305.4	42311.4		1	1	1	0	1	0	1	0	1	0	0	0	0	0	0	42305
26	42305.4	42305.4	42311.4		1	1	1	0	1	0	1	0	1	0	1	0	1	0	1	42305
26	42305.4	42305.4	42311.4		1	1	0	0	0	0	0	0	0	0	0	0	0	0	0	42305
26	42305.4	42305.4	42311.4		1	1	0	0	0	0	0	0	0	0	0	0	0	0	0	42305
26	42305.4	42305.4	42311.4		1	1	1	0	0	0	0	0	0	0	0	0	0	0	0	42305
26	42305.4	42305.4	42311.4		1	1	1	0	1	0	1	0	1	0	0	0	1	0	1	42305
26	42305.4	42305.4	42311.4		1	1	1	0	1	0	1	0	1	0	1	0	1	0	1	42305
26	42305.4	42305.4	42311.4		1	0	1	0	0	0	0	0	0	0	0	0	0	0	0	42305
26	42305.4	42305.4	42311.4		1	0	1	0	0	0	0	0	0	0	0	0	0	0	0	42305
26	42305.4	42305.4	42311.4		1	0	1	0	0	0	0	0	0	0	0	0	0	0	0	42305
26	42305.4	42305.4	42311.4		1	0	1	0	0	0	0	0	0	0	0	0	0	0	0	42305
26	42305.4	42305.4	42311.4		1	0	0	0	0	0	0	0	0	0	0	0	0	0	0	42305
26	42305.4	42305.4	42311.4		1	0	1	0	0	0	0	0	0	0	0	0	0	0	0	42305
